# Supplementary material for: Self-aware face emotion accelerated recognition algorithm: a novel neural network acceleration algorithm of emotion recognition for international students
Source: PeerJ Comput Sci. 2023 Sep 26;9:e1611. doi: 10.7717/peerj-cs.1611 (PMC10557955; doi:10.7717/peerj-cs.1611)
Supplement: Supplemental Information 1 [file peerj-cs-09-1611-s001.xlsx]

## Sheet: Sheet1
THRESHOLD	TPR	FPR
0	0.508065	0.0273109
0.05	0.604839	0.0420168
0.1	0.637097	0.0882353
0.15	0.66129	0.130252
0.2	0.685484	0.151261
0.25	0.709677	0.157563
0.3	0.693548	0.180672
0.35	0.725806	0.212185
0.4	0.75	0.243697
0.45	0.758065	0.258403
0.5	0.822581	0.346639
0.55	0.854839	0.369748
0.6	0.862903	0.506303
0.65	0.903226	0.62395
0.7	0.951613	0.60084
0.75	0.991935	0.619748
0.8	0.991935	0.829832
0.85	1	0.905462
0.9	1	0.960084
0.95	1	1
1	1	0.997899

## Sheet: Sheet2
The number of positive examples	Number of actually identified as T	The number of negative examples	The number of being mistaken as T
124	63	476	13
124	75	476	20
124	79	476	42
124	82	476	62
124	85	476	72
124	88	476	75
124	86	476	86
124	90	476	101
124	93	476	116
124	94	476	123
124	102	476	165
124	106	476	176
124	107	476	241
124	112	476	297
124	118	476	286
124	123	476	295
124	123	476	395
124	124	476	431
124	124	476	457
124	124	476	476
124	124	476	475
