# Supplementary material for: Self-aware face emotion accelerated recognition algorithm: a novel neural network acceleration algorithm of emotion recognition for international students
Source: PeerJ Comput Sci. 2023 Sep 26;9:e1611. doi: 10.7717/peerj-cs.1611 (PMC10557955; doi:10.7717/peerj-cs.1611)
Supplement: Supplemental Information 2 [file peerj-cs-09-1611-s002.xlsx]

## Sheet: ResNet
	SFEARA(ResNet)				ResNet
	acc	sirt	ec		acc	sirt	ec
	78.14	0.192	25.91		86.27	0.622	49.59
	85.31	0.122	31.05		82.3	0.51	48.28
	82.05	0.09	33.26		89.9	0.532	62.98
	85.41	0.082	22.46		81.71	0.47	63.58
	82.05	0.19	22.16		80.78	0.552	51.61
	81.22	0.162	35.33		82.3	0.572	57.61
	89.98	0.132	24.55		81.2	0.542	49.68
	89.87	0.09	33.63		90.77	0.642	58.51
	89	0.102	33.87		89.81	0.5	53.03
	77.46	0.08	36.19		84.33	0.452	58.34
	77.17	0.102	21.14		75.24	0.592	62.08
	80.55	0.102	27.18		78.17	0.562	64.04
	79.27	0.082	23.41		91.06	0.462	64.29
	79.73	0.152	27.15		89.37	0.48	50.94
	81.41	0.19	31.36		87.63	0.53	64.28
	85.62	0.062	25.22		87.81	0.5	63.8
	89.34	0.162	37.97		79.23	0.46	54.78
	88.17	0.17	25.43		87.51	0.52	59.95
	86.68	0.08	37.65		91.53	0.58	53.76
	89.39	0.19	26.52		85.09	0.64	59.39
	88.71	0.1	36.38		78.34	0.512	47.89
	81.45	0.192	25.83		81.12	0.512	62.6
	78.28	0.182	29.85		83.44	0.582	49.44
	79.38	0.05	26.47		77.01	0.592	54.54
	84.98	0.13	32.01		80.74	0.65	60.94
	77.41	0.102	34.82		78.62	0.46	50.77
	87.57	0.16	21.26		91.29	0.472	55.8
	84.82	0.19	22.81		85.58	0.512	64.6
	88.93	0.182	28.55		88.24	0.632	54.47
	77.29	0.132	29.02		86.02	0.48	51.8
	77.49	0.12	28.44		79.96	0.602	56.99
	84.84	0.172	32.53		75.02	0.6	58.41
	83.46	0.09	27.23		85.74	0.452	53.99
	88.07	0.06	29.33		81.36	0.65	50.62
	87.34	0.13	26.01		87.59	0.64	56.03
	80.39	0.182	30.81		81.11	0.55	54.12
	79.98	0.19	29.68		84.37	0.63	49.69
	86.29	0.15	25.98		77.53	0.552	64.13
	77.48	0.072	29.77		75.06	0.6	47.74
	80.79	0.17	32.37		77.06	0.522	51.72
	82.28	0.082	31.24		90.65	0.48	54.16
	88.4	0.092	36		81.86	0.53	57.97
	83.19	0.152	20.75		83.73	0.632	48.33
	82.33	0.182	32.55		84.97	0.49	52.72
	80.73	0.072	35.47		88.61	0.502	51.01
	80.72	0.11	26.56		81.43	0.552	52.7
	78.19	0.142	22.61		90.15	0.58	52.73
	79.28	0.072	21.15		89.4	0.562	51.67
	89.74	0.122	20.94		83.62	0.52	48.01
	79.63	0.172	31.82		76.16	0.562	64.81
	88.42	0.172	28.88		87.17	0.55	52.77
	82.42	0.05	23.1		76.51	0.512	63.96
	89.57	0.142	36.66		83.3	0.592	64.88
	77.11	0.15	33.81		75.04	0.542	47.94
	82.03	0.15	36.27		76.76	0.48	52.23
	86.52	0.072	33.74		86.39	0.592	60.2
	77.95	0.06	25.96		87.77	0.61	47.05
	88.21	0.162	26.77		78.89	0.63	47.15
	80.72	0.18	28.73		82.69	0.5	49.82
	81.16	0.09	22.84		88.9	0.562	54.19
	76.83	0.1	30.41		81.49	0.582	62.85
	79.87	0.122	31.83		79.52	0.532	51.82
	89.74	0.192	21.28		78.8	0.46	62.33
	80.26	0.082	27.65		86.96	0.48	49.75
	85.08	0.122	31.98		86.48	0.622	58.65
	84.37	0.112	21.41		82.49	0.472	54.53
	88.81	0.052	26.92		89.51	0.49	56.22
	77.36	0.11	24.33		81.23	0.592	52.35
	89.25	0.082	26.43		85.27	0.582	55.61
	89.3	0.172	26.3		77.78	0.56	51.37
	88.42	0.13	21.7		77.3	0.602	51.66
	81.98	0.052	29.16		84.94	0.602	59.11
	88.18	0.172	35.62		76.55	0.512	52.83
	89.29	0.142	29.86		81.59	0.592	63.96
	85.52	0.14	29.13		87.95	0.492	51.67
	78.33	0.152	22.87		79.43	0.55	49.32
	79.99	0.18	22.44		82.87	0.54	56.53
	86.26	0.062	37.02		88.81	0.502	55.01
	85.36	0.142	36.57		88.09	0.612	64
	89.83	0.19	24.93		83.92	0.622	47.47
	82.95	0.142	24.77		83.1	0.632	48.66
	80.19	0.14	34.67		81.94	0.6	51.21
	81.14	0.112	21.42		80.22	0.61	64.9
	78.62	0.13	31.41		78.37	0.58	54.94
	80.63	0.07	35.67		85.09	0.65	59.75
	86.75	0.07	33.9		90.84	0.52	49.45
	85.31	0.062	33.92		75.74	0.642	50.75
	77.69	0.102	23.36		81.83	0.492	53.34
	88.45	0.062	21.45		91.07	0.622	56.95
	88.13	0.132	28.4		79.93	0.502	59.02
	81.06	0.07	37.3		85.03	0.61	62.86
	76.91	0.05	21.48		75.73	0.6	51.84
	85.52	0.082	31.91		86.87	0.482	50.54
	84.63	0.152	26.56		87.29	0.63	47.64
	79.09	0.13	35.31		78.45	0.49	63.33
	79.93	0.132	32.08		86.46	0.542	58.25
	89.78	0.192	24.55		86.73	0.64	63.43
	79.61	0.09	26.39		76.66	0.492	55.47
	89.25	0.102	28.08		75.39	0.52	56.81
	84.95	0.13	32.34		88.93	0.642	47.71
	88.62	0.132	34.43		76.45	0.602	48.05
	87.92	0.12	36.51		90.8	0.602	54.8
	88.48	0.152	22.76		84.23	0.602	48.74
	82.66	0.05	36.47		82.51	0.502	56.77
	80.6	0.062	21.74		77.63	0.512	64.72
	83.11	0.152	20.88		87.1	0.62	52.93
	81.84	0.162	22.75		80.76	0.582	47.3
	82.11	0.05	32.48		76.95	0.49	52.45
	89.51	0.19	35.2		91.04	0.51	57.99
	80.76	0.05	21.69		89.09	0.65	62.46
	80.54	0.162	34.66		75.56	0.472	51.33
	89.16	0.062	23.16		90.58	0.65	58.31
	85.11	0.112	27.85		82.1	0.502	61.48
	87.59	0.072	27.1		78	0.492	61.2
	77.79	0.112	28.12		88.79	0.46	53.02
	77.84	0.182	30.12		90.84	0.5	55.7
	84.33	0.112	33.33		84.1	0.522	63.99
	77.4	0.132	29.67		75.61	0.5	59.64
	78.68	0.18	31.57		79.26	0.5	55.24
	77.43	0.092	24.41		85.21	0.472	55.28
	88.97	0.082	26.21		90.53	0.52	56.41
	89.28	0.062	37.35		85.87	0.592	51.51
	77.7	0.14	35.73		77.96	0.56	64.24
	88.66	0.09	29.8		90.43	0.54	53.18
	88.41	0.13	25.85		76.59	0.482	50.21
	80.75	0.09	37.74		79.52	0.55	59.38
	83.06	0.132	28.06		75.78	0.482	64.61
	81.12	0.19	34.75		81	0.55	62.79
	84.34	0.092	20.36		86.3	0.5	50.42
	86.38	0.06	27.38		84.58	0.61	55.5
	88.82	0.15	21.6		80.29	0.532	63.96
	84.3	0.102	24.84		78.26	0.592	55.56
	84.5	0.082	29.84		88.93	0.5	50.81
	77.51	0.18	29.92		88.07	0.47	51.21
	81.08	0.092	35.99		81.04	0.55	47.71
	82.5	0.102	29.69		88.95	0.59	58.26
	78.7	0.14	34.31		91.15	0.522	61.28
	78.07	0.13	32.59		84.8	0.452	60.09
	80.19	0.102	30.14		90.18	0.542	50.63
	87.58	0.152	25.07		75.27	0.48	47.65
	82.67	0.102	26.56		76.88	0.65	61.87
	80.27	0.12	20.29		91.15	0.55	57.27
	82.84	0.082	23.17		82.21	0.5	47.06
	78.19	0.1	28.92		78.3	0.47	64.43
	80.68	0.082	31.01		86.93	0.51	56.37
	79.36	0.11	31.8		86.8	0.49	50.27
	86.7	0.112	35.94		77.23	0.512	56.79
	78.37	0.142	31.32		87.04	0.472	49.29
	86.08	0.092	20.63		77.32	0.61	64.87
	83.7	0.082	22.25		76.51	0.502	58.48
	86.03	0.14	33.76		75.43	0.542	58.44
	77.37	0.132	29.37		85.89	0.59	57.04
	78.79	0.19	34.22		84.8	0.5	50.27
	81.86	0.152	35.48		87.04	0.55	60.65
	83.29	0.19	37.06		83.91	0.53	48.69
	80.67	0.14	36.26		87.58	0.552	58.67
	82.74	0.14	33.57		82.9	0.48	62.71
	86.72	0.17	20.2		91.26	0.582	51.53
	84.18	0.07	36.85		88.21	0.48	62.08
	88.88	0.12	36.35		90.13	0.522	47.19
	80.94	0.15	20.78		83.68	0.5	64.22
	89.26	0.062	36.53		82.58	0.56	47.32
	78.6	0.09	29.33		86.44	0.53	48.79
	87.86	0.06	25.45		86.41	0.63	64.88
	77.61	0.06	34.55		89.23	0.522	51.69
	77.12	0.11	37.89		78.88	0.452	54.88
	86.39	0.162	27.04		84.07	0.57	61.03
	77.82	0.11	25.92		82.09	0.612	49
	80.8	0.152	25.6		78.04	0.46	51.28
	79.74	0.07	29.35		86.67	0.612	52.97
	80.03	0.172	27.69		75.38	0.61	52.76
	86.73	0.19	26.33		92.09	0.562	62.48
	85.15	0.102	27.48		82.34	0.582	48.66
	82.76	0.07	32.44		87.1	0.6	56.35
	83.49	0.09	37.4		75.5	0.47	58.08
	86.91	0.09	35.42		86.43	0.552	49.37
	78.45	0.19	26.2		90.53	0.48	64.41
	82.86	0.15	31.69		77.46	0.582	48.28
	82.54	0.18	24.97		76.39	0.512	55.91
	80.76	0.06	34.97		83.36	0.46	56
	86.6	0.182	35.66		81.58	0.622	53.18
	88.16	0.08	36.87		88.62	0.51	62.46
	87.09	0.072	37.31		77.99	0.482	59.47
	77.42	0.12	37.27		88.2	0.572	50.73
	76.82	0.072	27.54		78.48	0.5	54.06
	88.92	0.062	36.92		79.32	0.5	48.04
	86.48	0.162	24.1		82.81	0.63	59.49
	87.05	0.172	24.18		81.2	0.58	56.37
	76.99	0.15	25.94		91.39	0.64	50.62
	86.97	0.09	22.69		77.18	0.502	54.05
	88.64	0.1	37.82		88	0.58	53.74
	88.4	0.152	33.92		91.91	0.63	47.55
	79.61	0.172	23.73		79.94	0.582	60.31
	80.72	0.092	28.66		79.32	0.452	47.39
	89.05	0.11	32.54		80.8	0.602	60.37
	77.69	0.18	36.75		77.44	0.54	61.04
	84.27	0.182	34.92		79	0.65	61.13
	88.51	0.17	30.63		75.03	0.62	52.52
	86.51	0.14	25.97		82.48	0.632	51.06
	80.07	0.08	34.87		86.53	0.512	63.99
	84.17	0.122	27.84		79.84	0.462	56.04
	84.73	0.102	27.8		80.73	0.632	57.94
	78.42	0.082	26.79		76.9	0.58	64.78
	86.41	0.162	34.38		75.78	0.452	60.78
	85.61	0.19	27.2		90.32	0.52	57.14
	84.33	0.18	22.14		80.02	0.56	60.34
	86.36	0.15	28.58		78.95	0.63	52.63
	88.93	0.102	24.3		76.21	0.592	47.37
	89.97	0.152	36.24		79.5	0.56	58.32
	78.23	0.052	22.79		80.24	0.462	48.78
	79.72	0.132	24.45		83.5	0.522	48.06
	85.12	0.142	33.76		78.34	0.59	54.6
	77.79	0.112	37.42		78.92	0.532	59.69
	87.55	0.122	25.02		84.2	0.53	53.23
	83.3	0.19	30.69		77.56	0.562	47.02
	88.81	0.172	20.71		90.79	0.572	48.85
	78.41	0.092	24.35		85.69	0.63	59.7
	87.25	0.172	37.14		84.56	0.582	48.32
	88.03	0.11	27.29		78.76	0.5	64.27
	83.14	0.102	27.57		85.39	0.62	63.81
	87.08	0.1	30.44		92.04	0.48	53.56
	84.27	0.17	37		76.12	0.56	51.02
	85.3	0.152	25.66		76.62	0.642	52.12
	79.88	0.16	29.39		84.03	0.602	50.95
	81.82	0.102	24.66		81.05	0.54	58.69
	88.57	0.082	25.98		76.32	0.47	57.09
	77.69	0.112	20.63		79.8	0.642	53.85
	80.21	0.05	22.46		82.01	0.49	60.55
	78.23	0.092	37.19		89.15	0.47	61.79
	85.26	0.192	33.78		85.36	0.54	59.3
	80.77	0.13	32.8		91.13	0.532	55.18
	81.91	0.15	25.41		85.8	0.562	53
	86.47	0.13	21.77		78.7	0.63	48.35
	89.53	0.152	34.29		79.7	0.48	52.44
	79.54	0.172	32.61		86.23	0.65	63.35
	76.95	0.162	27.49		91.69	0.53	58.84
	78.07	0.112	33.05		86.1	0.462	60.51
	86.86	0.12	31.55		86.79	0.51	54.27
	85.35	0.102	21.87		90.78	0.6	53.74
	87.74	0.12	26.2		91.59	0.572	60.64
	81.34	0.092	32.14		86.9	0.602	57.59
	79.37	0.18	34.56		76.47	0.46	47.29
	79.43	0.132	36.24		84.46	0.6	53.81
	85.87	0.19	22.98		75.01	0.6	57.24
	89.62	0.122	36.6		77.64	0.492	64.57
	88.7	0.132	35.46		81.62	0.55	63.87
	88.23	0.07	28.35		76.35	0.61	48.93
	85.7	0.09	35.63		77.7	0.55	62.74
	80.25	0.172	30.56		90.64	0.6	47.35
	81.91	0.08	26.84		90.9	0.572	50.74
	78.81	0.172	23.68		76.21	0.502	51.48
	86.08	0.112	24.94		87.1	0.46	48.4
	88.28	0.17	21.92		75.46	0.532	49.86
	80.66	0.16	23.62		83.13	0.572	59.11
	79.69	0.09	35.16		78.91	0.612	62.56
	85.2	0.14	37.8		80.99	0.582	64.83
	87.18	0.142	22.35		78.96	0.622	51.61
	87.2	0.152	25.65		84.88	0.632	64.15
	79.46	0.14	35.54		86.04	0.51	61.1
	87.01	0.122	24.4		85.13	0.51	56.52
	84.09	0.09	29.42		78.97	0.552	64.56
	82.2	0.092	26.38		78.9	0.532	63.99
	83.95	0.14	30.85		81.62	0.532	59.44
	77.25	0.17	20.96		81.29	0.6	50.52
	81.12	0.152	29.11		89.62	0.452	50.42
	85.07	0.152	22.79		88.09	0.55	51.74
	78.37	0.092	32.93		77.94	0.522	58.21
	89.81	0.162	21.24		77	0.622	56.77
	81.5	0.08	20.16		79.25	0.532	55.61
	86.49	0.08	36.44		77.4	0.642	63.9
	87.71	0.14	27.94		84.12	0.5	63.92
	80.83	0.082	26.58		81.19	0.482	48.96
	87.56	0.13	21.4		76.88	0.512	48.47
	85.88	0.1	37.75		88.57	0.522	62.01
	80.76	0.052	32.35		83.51	0.54	62.14
	77.59	0.092	27.94		84.12	0.642	59.63
	87.43	0.08	29.67		81.7	0.582	54.01
	87.42	0.08	37.5		80.5	0.63	49.62
	82.31	0.06	33.85		89.49	0.49	63.37
	82.5	0.19	35.27		86.73	0.46	59.2
	82.66	0.05	34.58		79.68	0.622	61.78
	88.5	0.16	33.04		89.21	0.49	52.2
	83.3	0.1	28.2		75.22	0.542	48.1
	83.97	0.132	21.94		82.64	0.632	64.43
	77.4	0.17	31.92		81.97	0.58	48.65
	81.65	0.112	36.92		87.75	0.462	61.38
	89.4	0.162	34.07		88.38	0.64	52.89
	81.55	0.062	26.78		80.45	0.58	48.56
	88.99	0.132	22.52		77.22	0.61	52.02
	83.88	0.172	30.91		89.53	0.59	64.55
	88.38	0.052	27.2		76.66	0.46	52.53
	79.21	0.14	31.58		83.37	0.59	47.81
	89.68	0.082	32.7		76.23	0.562	50.4
	84.44	0.122	37.4		84.48	0.532	48.54
	76.93	0.14	21.13		75.93	0.582	54.23
	85.43	0.162	32.01		76.06	0.612	50.09
	82.02	0.152	34.79		82.06	0.472	61.92
	86.43	0.132	29.37		82.8	0.542	51.97
	88	0.19	31.33		77.58	0.51	60.36
	88.89	0.18	27.02		78.98	0.472	52.74
	76.9	0.09	32.67		85.71	0.55	56.82
	88.04	0.08	22.54		89.37	0.51	56.53
	79.13	0.07	30.44		83	0.602	56.92
	88.25	0.052	34.25		87.45	0.5	50.12
	88.37	0.142	20.18		77.66	0.612	56.41
	89.34	0.152	34.91		76.41	0.6	56.35
	78.18	0.092	23.35		75.41	0.562	50.31
	80.02	0.182	28.38		87.15	0.452	62.09
	78.15	0.142	23.05		91.97	0.61	54.83
	81.08	0.152	26.31		85.4	0.582	48.82
	84.13	0.082	21		84.5	0.602	58.14
	85.99	0.092	27.87		83.2	0.602	55.63
	85.73	0.12	29.65		78.25	0.49	48.35
	82.85	0.14	35.7		90.56	0.552	51.96
	79.11	0.072	34.86		83.46	0.462	57.26
	85.22	0.132	20.14		89.51	0.61	58.84
	85.59	0.102	27.23		90.6	0.592	60.69
	82.91	0.15	22.89		83.96	0.632	61.34
	80.85	0.09	36.57		89.11	0.552	55.48
	82.84	0.13	30.58		82.18	0.49	47.62
	82.74	0.152	21.92		75.36	0.482	51.91
	88.57	0.15	34.85		89.2	0.48	49.03
	83.54	0.14	28.83		82.23	0.602	64.41
	80.49	0.07	34.93		86.46	0.632	47.53
	87.35	0.16	28.81		91.42	0.552	50.22
	82.35	0.11	30.67		79.55	0.592	64.04
	86.41	0.092	33.26		83.33	0.542	50.1
	85.28	0.13	36.76		86.1	0.46	59.67
	81.6	0.14	20.79		88.29	0.49	60.47
	89.88	0.17	24.05		92.14	0.58	48.02
	87.75	0.18	34.02		92.2	0.532	50.74
	86.82	0.172	25.51		83.82	0.64	53.2
	78.84	0.17	27.9		75.07	0.51	57.78
	78.62	0.17	23.82		85.36	0.612	47.39
	79.7	0.19	30.48		83.4	0.58	53.29
	81.27	0.12	35.16		80.44	0.53	57.75
	84.51	0.09	24.16		77.54	0.562	57.73
	85.18	0.122	30.51		90.94	0.51	63.3
	87.92	0.16	25.44		90.2	0.642	64.36
	78.05	0.142	37.21		78.38	0.5	63.87
	84.99	0.18	34.53		85.78	0.572	48.81
	77.73	0.13	20.48		78.02	0.552	52.14
	86.65	0.102	26.78		90.23	0.522	60.42
	84.8	0.12	26.08		77.1	0.59	58.44
	87.42	0.192	28.72		82.01	0.502	53.2
	84.78	0.12	23.05		82.98	0.472	52.73
	85.88	0.152	37.62		76.53	0.65	62.97
	87.9	0.13	34.06		83.3	0.55	58.27
	80.05	0.1	20.93		90.28	0.46	58.94
	79.07	0.15	25.87		86.7	0.572	54.31
	89.56	0.09	24.36		77.39	0.49	60.27
	88.59	0.112	24.01		77.3	0.462	60.73
	82.4	0.142	23.15		88.8	0.572	55.7
	89.74	0.06	31.69		88.57	0.642	64.78
	86.92	0.17	24.08		81.77	0.642	49.31
	82.34	0.092	30.82		78.12	0.642	61.65
	85.65	0.052	30.04		87.95	0.63	57.54
	89.83	0.062	22.92		76.93	0.622	59.94
	80.53	0.152	34.49		85.88	0.53	58.46
	77.71	0.15	36.9		84.39	0.63	53.54
	77.43	0.09	27.12		76.66	0.47	60.87
	84.25	0.07	28.43		88.9	0.47	51.46
	76.83	0.072	27.7		87.01	0.542	55.26
	76.8	0.12	22.85		76.92	0.612	49.63
	80.24	0.182	31.24		80.01	0.472	61.58
	84.53	0.092	29.77		87.76	0.612	52.31
	81.48	0.18	28.83		85.34	0.532	50.15
	84.44	0.05	34.07		79.38	0.532	58.47
	85.51	0.11	32.9		77.47	0.512	48.58
	88.25	0.08	20.79		91.83	0.532	55.17
	82.14	0.07	32.51		90.69	0.47	58.06
	81.48	0.11	21.54		81.89	0.512	49.31
	83.55	0.13	27.34		85.91	0.572	55.71
	83.32	0.12	31.02		83.76	0.472	64.04
	78.45	0.16	24.82		91.29	0.55	49.37
	82.06	0.06	25.97		81.14	0.472	57.71
	83.02	0.13	25.76		86.35	0.512	64.24
	82.43	0.09	20.41		87.85	0.482	55.51
	78.78	0.112	23.94		92.19	0.482	57.27
	84.1	0.112	36.97		89.72	0.65	59.35
	77.93	0.18	35.49		76.17	0.542	57.88
	83.54	0.15	35.08		83.61	0.58	52.01
	81.77	0.11	36		91.08	0.48	60.88
	86.38	0.15	21.47		77.82	0.64	57.9
	86.52	0.1	29.23		78.41	0.532	64.05
	87.79	0.13	32.04		81.3	0.61	54.37
	87.1	0.192	20.92		88.9	0.62	59.15
	87.66	0.082	26.46		86.3	0.65	61.47
	83.05	0.15	30.71		75.33	0.632	59.43
	83.37	0.08	20.1		81.12	0.63	48.27
	85.49	0.19	29.34		87.28	0.632	64.16
	87.44	0.072	30.53		87.06	0.6	62.21
	77.39	0.192	32.55		83.34	0.59	50.6
	79.57	0.192	25.16		81.93	0.63	61.06
	77.84	0.13	32.44		84.26	0.522	52.13
	82.37	0.102	23.2		84.31	0.602	52.37
	83.59	0.11	31.67		89.82	0.532	49.73
	85.84	0.072	20.65		86.7	0.55	62.05
	76.89	0.182	25.49		84.93	0.63	53.93
	88.41	0.082	27.61		77.54	0.572	47.76
	78.6	0.17	31.91		84.43	0.612	52.53
	80.04	0.1	22.11		91.36	0.59	60.92
	77.56	0.07	29.41		79.45	0.5	57.69
	81.42	0.13	26.28		77.44	0.61	63.46
	82.47	0.19	33.33		90.64	0.55	57.73
	78.35	0.102	21.47		82.02	0.462	50.24
	82.47	0.172	20.73		78.5	0.63	63.79
	81.65	0.092	25.68		76.67	0.46	61.83
	84.9	0.092	32.55		79.09	0.64	48.01
	80.89	0.052	35.4		91.48	0.552	54.01
	85.87	0.132	34.41		85.26	0.542	56.76
	78.39	0.18	31.45		88.14	0.47	57.11
	85.45	0.19	32.82		87.21	0.61	52.86
	82.15	0.092	23.93		86.55	0.63	56.91
	84.44	0.152	35.98		87.17	0.532	53.53
	78.88	0.142	30.93		90.22	0.51	58.59
	81.25	0.182	37.61		79.19	0.65	49.92
	81.24	0.1	20.5		78.19	0.622	55.15
	84.39	0.162	23.45		79.32	0.51	61.91
	89.04	0.09	35.87		76.03	0.502	47.47
	88.41	0.13	27.51		84.02	0.61	55.87
	78.43	0.062	22.54		88	0.48	56.87
	86.39	0.17	33.37		81.79	0.622	51.98
	77.91	0.15	33.97		76.14	0.54	49.84
	83.16	0.052	27.91		91.18	0.56	53.51
	84.74	0.182	28.04		75.81	0.64	64.19
	87.62	0.182	37.61		84.91	0.51	55.88
	88.73	0.12	27.68		89.36	0.462	55.11
	79.97	0.092	27.24		78.66	0.562	58.68
	89.57	0.052	24.22		88.2	0.61	54.95
	83.19	0.12	35.08		91.58	0.46	57.77
	79.75	0.182	34.31		86.29	0.55	63.97
	80.65	0.17	22.49		80.71	0.58	60.22
	78.31	0.162	26.04		85.91	0.56	50.12
	85.99	0.06	29.73		85.81	0.47	50.42
	82.85	0.092	22.53		88.44	0.64	48.6
	81.04	0.162	23.09		76.36	0.54	52.02
	86.87	0.19	25.27		83.86	0.65	63.88
	83.5	0.142	35.11		90.8	0.52	49.54
	86.96	0.12	29.16		82.89	0.59	55.02
	78.73	0.12	25.56		81.99	0.53	47.6
	83.76	0.092	32.21		89.26	0.57	56.91
	88.75	0.082	32.83		84.77	0.6	47.29
	79.08	0.082	22.39		82.54	0.54	63.16
	86.23	0.052	37.68		85.36	0.46	61.53
	79.91	0.16	21.09		77.89	0.57	50.05
	77.55	0.07	23.83		78.22	0.54	64.06
	83.53	0.122	28.77		85.76	0.632	51.43
	87.02	0.12	28.84		76.36	0.56	62.29
	82.95	0.182	26.93		79.29	0.63	61.49
	85.79	0.082	29.27		80.89	0.512	48.25
	82.6	0.082	21.38		76.2	0.47	62.41
	89.15	0.12	26.39		85.53	0.51	57.94
	87.91	0.092	26.77		84.8	0.53	58.53
	86.56	0.122	26.53		77.95	0.55	54.23
	81.97	0.112	21.89		76.36	0.56	47.73
	83.72	0.14	21.58		87.86	0.55	64.26
	84.68	0.142	36.36		91.37	0.58	58.46
	86.98	0.192	33.86		87.22	0.582	63.04
	87.27	0.102	31.94		90.73	0.46	56.45
	81.11	0.152	30.46		92.08	0.5	56.3
	78.43	0.14	34.63		83.42	0.53	64.61
	85.68	0.15	32.98		75.4	0.49	54.18
	81.2	0.162	20.81		75.63	0.55	52.69
	86.31	0.16	24.26		91.08	0.54	63.3
	78.92	0.1	30.06		82.46	0.582	57.9
	84.02	0.052	22.22		78.19	0.602	61.47
	76.95	0.1	28.6		83.76	0.47	63.39
	84.41	0.07	25.21		85.81	0.47	52.88
	84.42	0.072	27.14		91.2	0.502	49.28
	86.97	0.15	31.49		82.07	0.492	54.21
	88.29	0.13	28.94		82.61	0.56	61.19
	77.46	0.09	21.79		80.28	0.622	54.25
	88.53	0.17	35.51		91.89	0.582	48.73
	89.21	0.182	27.71		82.03	0.46	61.42
	78.26	0.14	37.73		89.84	0.54	53.66
	80.74	0.082	21.46		80.03	0.512	56.21
	78.57	0.162	25.91		79.03	0.46	50.18
	78.4	0.14	23.25		91.03	0.54	62.62
	79.51	0.16	30.71		88.76	0.622	62.07
	83.65	0.09	33.81		89.48	0.542	57.25
	83.93	0.18	30.13		85.1	0.632	64.37
	83.52	0.052	35.37		76.87	0.58	61.83
	87.54	0.19	20.79		86.34	0.58	64.71
	86.28	0.11	24.9		91.14	0.64	60.87
	78.28	0.122	32.11		86.24	0.6	61.45
	79.24	0.09	28.98		79.95	0.582	48.08
	82.53	0.11	33.86		89.69	0.46	52.45
	77.57	0.08	22.12		78.29	0.542	53.76
	83.93	0.07	28.17		90.49	0.542	63.44
	84.88	0.052	33.08		88.98	0.5	60.32
	87.08	0.15	29.31		86.71	0.562	50.84
	77.49	0.122	36.25		87.4	0.54	55.12
	84.27	0.172	24.54		90.81	0.602	58.43
	86.99	0.11	29.42		75.47	0.562	55.26
	88.53	0.08	27.48		78.43	0.58	61.59
	80.97	0.152	37.26		80.18	0.59	53.55
	85.12	0.17	30.46		85.49	0.47	58.98
	79.47	0.12	21.95		90.48	0.51	53.27
	88.92	0.192	23.79		79.49	0.582	63.81
	79.83	0.08	29		88.18	0.56	57.68
	82.41	0.07	33.97		83.86	0.58	60.61
	85.73	0.07	35.22		79.8	0.62	53.76
	84.59	0.112	23.59		88.22	0.48	63.08
	77.44	0.14	37.19		83.58	0.572	63.4
	89.9	0.172	25.4		88.39	0.5	61.75
	77.92	0.08	20.02		81.07	0.59	56.31
	78.96	0.11	36.69		89.56	0.62	51.17
	83.74	0.142	20.67		86.7	0.6	52.17
	78.93	0.17	25.82		80.72	0.54	48.18
	86.91	0.052	34.69		88.12	0.562	53.2
	77.76	0.172	28.7		89.6	0.572	59.85
	89.78	0.12	31.75		77.6	0.6	63.91
	79	0.06	28.07		88.25	0.62	60.93
	86.61	0.16	26.92		87.59	0.52	55.25
	88.44	0.06	37.33		87.05	0.48	64.68
	89.27	0.092	27.95		84.47	0.492	63.02
	77.25	0.102	29.76		80.16	0.532	57.99
	77.53	0.062	20.15		86.32	0.62	55.24
	89.81	0.13	24.02		85.12	0.502	49.34
	84.99	0.13	20.01		92.05	0.472	55.5
	87.14	0.16	27.05		81.39	0.542	51.47
	79.64	0.11	25.65		80.92	0.62	49.7
	89.78	0.14	36.91		81.49	0.552	47.82
	89.34	0.152	33.41		82.31	0.47	48.45
	82.85	0.082	25.11		91.06	0.572	51.28
	84.94	0.14	26.38		86.38	0.502	47.59
	79.79	0.112	34.19		85.34	0.52	56.85
	77.54	0.18	37.78		82.8	0.65	51.96
	82.37	0.09	30.72		78.58	0.552	64.51
	85.55	0.072	30.52		77.3	0.572	49.52
	80.33	0.072	23.22		81.36	0.582	50.44
	81.18	0.1	29.06		86.56	0.57	59.63
	83.52	0.062	25.58		88.13	0.542	57.81
	77.27	0.182	36.22		76.41	0.642	64.94
	86.35	0.112	24.35		79.43	0.55	59.33
	84.29	0.07	21.69		90.77	0.622	64.7
	79.83	0.142	31.56		78.99	0.57	54.94
	79.03	0.07	32.05		88.95	0.472	55.22
	77.35	0.122	21.25		85.76	0.64	50.7
	80.39	0.08	31.37		85.87	0.54	57.46
	78.28	0.152	29.85		92.12	0.54	57.23
	85.17	0.12	29.54		77.63	0.602	48.98
	80.62	0.13	28.72		86.61	0.472	52.09
	87.52	0.092	35.34		76.79	0.492	59.36
	89.04	0.162	23.68		89.51	0.53	50.25
	80.24	0.122	37.99		89.77	0.612	52.53
	80.22	0.072	36.52		91.51	0.572	57.89
	83.29	0.11	21.67		88.33	0.602	57.95
	85.44	0.052	25.02		86.23	0.602	60.36
	78.08	0.14	27.28		81.51	0.562	47.99
	79.73	0.08	31.06		89.94	0.502	47.54
	80.68	0.062	21.91		86.36	0.58	62.3
	81.21	0.19	31.67		86.31	0.46	53.52
	78.2	0.132	30.12		86.81	0.5	63.61
	81.54	0.08	36.01		75.64	0.562	57.28
	77.67	0.1	36.9		90.19	0.47	47.68
	78.36	0.09	27.05		83.68	0.472	60.3
	84.7	0.17	28.19		77.41	0.622	57.95
	84.03	0.162	23.63		76.04	0.59	51.74
	88.22	0.112	26.01		75.04	0.572	53.7
	86.45	0.192	29.89		77.1	0.562	64.97
	76.88	0.1	31.63		87.24	0.492	61.89
	83.75	0.162	31.54		80.62	0.52	64.43
	86.92	0.06	24.33		79.55	0.632	56.09
	89.19	0.052	26.95		80.19	0.462	64.05
	78.7	0.142	30.08		78.58	0.5	56.42
	83.25	0.182	35.13		81.71	0.492	58.67
	89.11	0.19	37.16		77.15	0.58	64.89
	86.93	0.132	22.12		81.29	0.472	59.98
	88.82	0.182	37.82		81.32	0.492	57.22
	78.06	0.092	22.77		88.27	0.5	55.31
	83.83	0.09	21.94		91.09	0.56	52.92
	79.08	0.102	31.64		83.89	0.56	60.48
	82.62	0.13	33.01		75.56	0.472	63.32
	85.49	0.08	32.33		76.6	0.56	47.32
	77.38	0.08	30.82		87.16	0.592	60.06
	88.54	0.152	23.69		89.89	0.622	50.62
	85.88	0.1	29.08		84.91	0.47	58.04
	88.1	0.072	25.45		81.23	0.51	49.81
	85.29	0.122	24.41		78.78	0.55	63.29
	87.19	0.07	29.3		84.39	0.542	59.7
	88.24	0.142	33.72		86.34	0.56	60.16
	84.75	0.11	29.27		80.06	0.64	47.11
	88.13	0.07	29.29		77.99	0.502	53.02
	87.97	0.13	22.74		79.39	0.6	59.36
	88.16	0.15	37.38		84.53	0.592	57.34
	80.23	0.11	35.25		78.43	0.57	50.33
	89.63	0.052	24.89		89.85	0.512	52.38
	86.47	0.072	36.35		77.3	0.542	53.25
	78.84	0.08	34.01		76.41	0.51	64.67
	77.5	0.132	28.57		84.6	0.522	60.62
	84.64	0.132	25.27		83.17	0.592	60.02
	82.57	0.092	31.79		88.47	0.522	51.87
	77.54	0.152	37.56		87.02	0.502	47.93
	80.47	0.07	29.71		88.4	0.512	55.47
	88.22	0.16	32.39		78.53	0.5	52.32
	86.95	0.13	28.67		86.16	0.642	59.17
	83.09	0.13	32.2		79.66	0.522	55.4
	85.23	0.12	20.29		92.05	0.632	60.99
	86.53	0.052	34.65		77.72	0.562	60.54
	81.53	0.152	20.73		89.01	0.512	61.56
	89.49	0.14	32.74		83.18	0.632	48.06
	89.34	0.112	23.54		77.65	0.572	62.03
	80.84	0.09	22.34		81.33	0.53	62.76
	85.78	0.092	28.97		76.74	0.522	61.57
	84.08	0.072	28.92		85.9	0.54	48.84
	80.77	0.18	35.03		77.67	0.502	64.61
	80.77	0.142	36.68		81.98	0.61	58.01
	83.26	0.132	35.7		78.34	0.642	54.69
	84.74	0.15	28.82		75.71	0.532	61.89
	82.29	0.15	36.46		86.38	0.58	55.61
	87.66	0.15	28.38		89.98	0.57	60.93
	83.26	0.06	24.31		77.48	0.59	51.8
	78.65	0.09	22.97		88.6	0.58	62.02
	77.04	0.092	30.36		84.99	0.532	60.17
	82.96	0.152	37.78		81.94	0.552	63.8
	86.31	0.11	23.3		77.21	0.57	63.55
	78.76	0.14	26.63		86.93	0.51	57.79
	84.03	0.09	22.03		85.28	0.562	54.37
	79.98	0.182	26.76		90.14	0.48	52.39
	81.01	0.052	31.29		90.9	0.502	48.07
	79.3	0.12	21.35		85.4	0.582	48.55
	86.87	0.142	33.6		90.96	0.62	54.29
	82.33	0.052	26.28		79.68	0.642	64.8
	89.73	0.1	29.21		88.81	0.53	57.12
	86.23	0.102	25.86		88.87	0.64	56.54
	84.24	0.18	21.47		78.25	0.472	58.69
	78.37	0.182	22.17		83.81	0.5	47.6
	81.43	0.09	28.31		83.47	0.49	51.27
	79.62	0.102	27.66		76.91	0.492	50.13
	85.85	0.152	34.39		83.7	0.532	55.09
	89.53	0.14	36.93		76.42	0.542	62.66
	80.38	0.06	36.36		89.86	0.65	57.34
	86.7	0.13	21.89		84.93	0.462	51.78
	88.76	0.052	35.92		87.74	0.6	51.07
	77.14	0.18	32.19		85.74	0.562	49.58
	88.04	0.1	28.14		81.53	0.61	59.47
	80.03	0.092	33.02		82.55	0.59	52.1
	84.92	0.192	28.84		91.55	0.472	63.33
	79.21	0.112	25.22		91.79	0.61	59.46
	86.73	0.15	28.54		87.91	0.52	63.27
	83.11	0.152	31.43		89.38	0.632	57.71
	88.84	0.072	30.31		90.18	0.552	59.83
	81.32	0.062	23.28		76.55	0.562	59.75
	79.89	0.08	30.29		87.68	0.52	64.58
	88.35	0.1	28.7		80.47	0.59	64.63
	88.93	0.132	29.73		91.95	0.562	57.51
	78.22	0.152	24.58		90.07	0.61	48.27
	77.88	0.102	31.1		82.04	0.532	47.89
	77.54	0.132	26.4		85.93	0.58	54.03
	82.7	0.172	25.04		90.14	0.49	52.46
	83.64	0.06	23.45		78.95	0.532	58.42
	77.09	0.13	35.46		85.21	0.64	54.21
	83.55	0.112	31.36		78.28	0.472	63.99
	88.67	0.12	28.61		77.97	0.57	49.54
	77.99	0.052	24.18		77.26	0.612	54.72
	84.8	0.062	31.37		90.49	0.57	64.39
	87.56	0.05	27.51		91.77	0.57	50.59
	82.72	0.142	35.39		76.96	0.57	63.76
	86.97	0.102	37.63		86.47	0.55	55.09
	82.53	0.122	27.01		90.77	0.6	60.1
	87.94	0.172	34.86		83.49	0.532	58.79
	80.75	0.062	37.62		86.95	0.522	48.39
	79.81	0.06	21.01		80.92	0.522	49.93
	83	0.102	34.36		89.08	0.49	49.12
	87.61	0.17	36.49		85.01	0.502	49.46
	81.11	0.102	23.74		91.32	0.62	48.74
	84.58	0.132	31.72		81.47	0.632	55.16
	81.81	0.13	21.55		83.73	0.522	47.49
	89.56	0.06	35.69		89.28	0.572	64.77
	85.38	0.072	30.48		87.79	0.622	47.46
	77.86	0.162	26.43		82.82	0.53	54.3
	88.28	0.13	34.81		91.6	0.472	52.44
	83.49	0.19	30.85		86.4	0.602	50.28
	88.83	0.07	21.99		77.64	0.61	53.78
	80.91	0.052	31.27		90.59	0.542	55.17
	80.06	0.16	34.4		81.25	0.462	48.13
	80.85	0.062	26.29		86.99	0.56	49.8
	83.86	0.092	27.54		75.26	0.56	54.34
	88.71	0.11	31.09		83.02	0.612	48.71
	88.95	0.102	37.71		82.82	0.552	51.11
	89.12	0.092	32.69		83.27	0.592	51.12
	77.5	0.09	23.54		79.56	0.47	51.33
	80.42	0.15	33.98		82.82	0.56	56.12
	84.76	0.132	28.6		92.07	0.57	57.13
	79.23	0.122	34.79		90.54	0.462	59.07
	88.5	0.1	33.81		77.25	0.64	53.66
	79.39	0.14	30.18		84.32	0.64	51.38
	79.58	0.142	26.84		83.59	0.492	61.41
	79.33	0.11	28.09		76.73	0.572	50.38
	82.43	0.142	37.68		90.42	0.5	49.59
	87.79	0.182	37.26		87.12	0.462	54.78
	82.3	0.13	30.17		75.16	0.55	56.31
	79.93	0.122	21.13		82.95	0.642	50.17
	78.62	0.17	33.65		82.76	0.482	61.94
	80.15	0.152	33.89		89.39	0.482	59.59
	82.71	0.152	27.22		86.18	0.622	52.6
	83.24	0.052	30.49		91.06	0.52	48.46
	88.6	0.19	25.93		85.5	0.462	62.12
	89.24	0.06	33.43		82.6	0.552	63.91
	81.5	0.112	37.86		88.31	0.552	56.52
	83.85	0.062	20.18		81.19	0.48	51.85
	89.43	0.12	36.99		84.15	0.58	56.4
	84.59	0.122	31.26		82.57	0.502	59.8
	87.23	0.12	26.82		88.28	0.52	51.58
	82.27	0.112	20.21		83.94	0.58	64.58
	88.89	0.06	26.85		81.42	0.472	47.67
	77.03	0.17	32.38		80.91	0.5	57.99
	83.5	0.092	34.47		78.83	0.62	63.88
	89.54	0.15	31.98		82.14	0.61	60.64
	79.68	0.07	29.42		82.86	0.532	54.38
	79.46	0.16	21.13		86.65	0.55	52.19
	81.14	0.142	20.79		87.65	0.502	50.98
	86.52	0.132	34.52		75.53	0.6	58.9
	86.15	0.08	20.23		83.25	0.592	53.01
	80.87	0.182	32.97		80.52	0.46	49.27
	84.88	0.052	32.06		80.82	0.51	58.66
	80.77	0.17	34.2		84.47	0.502	62.91
	85.95	0.13	25.28		77.88	0.522	61.77
	80.77	0.132	27.79		89.07	0.46	51.45
	83.24	0.11	25.63		89.86	0.492	55.57
	85.98	0.122	24.49		85.97	0.55	48.59
	85.47	0.062	20.19		85.01	0.52	50.02
	85.68	0.182	26.22		89.22	0.552	63.26
	85.83	0.09	35.6		91.79	0.612	56.63
	85.54	0.13	27.47		83.16	0.47	58.34
	88.71	0.07	33.05		82.68	0.61	64.52
	79.21	0.19	22.57		81.51	0.632	61.79
	89.93	0.112	34.14		75.21	0.552	48.29
	80.32	0.132	21.27		89.62	0.6	54.41
	82.71	0.122	32.77		90.79	0.622	47.94
	81.63	0.14	28.92		78.53	0.492	51.51
	84.68	0.12	21.49		89.94	0.52	51.18
	82.35	0.07	24.31		80.55	0.582	49.52
	78.61	0.13	36.47		77.43	0.62	57.46
	83.42	0.102	23.95		76.44	0.602	54.82
	77.93	0.06	24.48		85.78	0.55	55.24
	87.37	0.102	23.63		90.37	0.502	61.51
	85.13	0.06	27.32		87.62	0.55	58.56
	87.07	0.14	25.63		89.19	0.62	54.81
	85.69	0.14	28.91		85.66	0.492	50.99
	77.7	0.152	28.08		77.66	0.512	61.02
	80.84	0.08	25.99		89.8	0.462	64.56
	89.5	0.05	30.33		88.48	0.54	55.82
	78.56	0.182	29.2		83.68	0.48	52.82
	79.29	0.06	27.39		76.99	0.642	52.25
	82.04	0.16	30.12		80.41	0.48	58.23
	81.24	0.09	26.61		88	0.48	55.9
	84.14	0.1	26.15		80.74	0.492	47.25
	89.27	0.17	30.58		78.59	0.512	62.41
	82.22	0.12	34.51		84.57	0.602	59.57
	77.6	0.1	29.5		76.17	0.482	53.77
	82.1	0.082	26.18		88.39	0.65	62.32
	89.24	0.142	25.86		86.59	0.62	56.94
	88.29	0.132	27.57		75.51	0.502	60.61
	78.24	0.18	21.68		82	0.522	60.35
	88.06	0.162	33.46		79.19	0.54	56.54
	82.52	0.152	29.96		84.17	0.512	53.59
	87.53	0.122	32.63		78.37	0.58	53.57
	89.51	0.132	28.37		81.57	0.61	56.68
	89.13	0.18	35.83		92.16	0.542	53.33
	81.56	0.11	33.14		83.83	0.602	55.91
	79.83	0.18	21.52		90.75	0.542	58.5
	89.5	0.06	23.37		79.5	0.462	49.39
	80.96	0.18	35.78		82.16	0.602	63.36
	82.93	0.122	28.14		75.24	0.502	53.78
	86.87	0.09	34.43		83.27	0.592	48.39
	78.54	0.15	21		78.93	0.602	58.3
	79.76	0.102	30.73		88.54	0.64	50.15
	84.29	0.07	20.41		88.54	0.582	48.97
	79.18	0.052	23.49		80.93	0.492	60.26
	79.44	0.1	20.72		88.97	0.61	59.39
	79.15	0.082	30.29		77.33	0.54	60.99
	79.51	0.07	30.43		84.18	0.57	52.99
	84.1	0.112	31.48		91.23	0.502	49.21
	77.7	0.14	36.83		91.46	0.492	59.52
	89.98	0.13	35.21		92.13	0.49	58.27
	83.04	0.16	30.57		88.25	0.64	49.85
	79.88	0.11	33.68		85.71	0.54	55.92
	78.89	0.152	31.64		92.06	0.452	59.73
	87.22	0.06	32.76		84.23	0.51	50.72
	86.23	0.152	36.83		91.01	0.6	51.87
	86.77	0.142	33.14		75.26	0.61	53.49
	82.18	0.05	27.71		76.13	0.582	56.3
	78.88	0.13	34.76		89.5	0.482	57.95
	88.72	0.192	31.5		88.96	0.612	57.26
	80.87	0.11	21.66		89.52	0.47	51.52
	79.77	0.162	22.26		90.58	0.592	50.27
	84.16	0.06	26.71		80.09	0.572	58.63
	77.45	0.08	30.14		81.07	0.53	61.59
	80.79	0.08	37.36		90.31	0.602	50.36
	83.88	0.142	22.49		79.47	0.542	57.63
	89.42	0.13	31.72		85.71	0.55	61.37
	81.47	0.182	29.45		90.92	0.482	63.6
	85.06	0.14	20.32		84.53	0.552	56.07
	83.28	0.172	36.98		84.03	0.592	59.92
	85.48	0.08	33.51		87.79	0.472	61.15
	78.85	0.182	20.22		78.35	0.49	59
	87.14	0.052	35.6		89.97	0.492	52.36
	77.54	0.152	26.5		87.63	0.582	62.53
	83.01	0.072	27.44		85.31	0.612	47.96
	84.52	0.112	29.02		78.22	0.512	54.4
	88.3	0.152	28.85		80.47	0.582	54.11
	87.99	0.112	21.45		85.95	0.47	64.6
	79.59	0.092	34.05		79.99	0.582	64.47
	87.83	0.152	26.24		91.82	0.59	54.43
	79.68	0.182	32.37		82.66	0.58	50.2
	84.01	0.06	30.1		90.42	0.57	58.85
	76.97	0.06	27.9		84.48	0.55	49.38
	84.2	0.1	36.86		76.58	0.6	54.52
	82.67	0.18	37.43		85.05	0.47	53.62
	88.05	0.102	21.48		81.13	0.592	53.25
	79.6	0.092	30.87		81.62	0.63	61.3
	77.18	0.122	29.89		90.65	0.592	55.84
	79.66	0.072	26.73		78.77	0.602	48.67
	83.65	0.09	35.21		88.83	0.49	59.16
	81.91	0.072	37.9		90.67	0.49	50.25
	88.52	0.072	26.18		82.46	0.65	55.41
	89	0.182	31.72		87.41	0.572	50.47
	77.64	0.142	31.93		83.81	0.6	47.38
	79.62	0.162	23.03		85.92	0.572	54.22
	89.46	0.12	22.57		88.1	0.54	63.34
	84.27	0.172	28.27		83.71	0.49	54.73
	88.5	0.06	25.44		78.68	0.64	62.32
	77.34	0.132	31.68		85.97	0.55	48.36
	81.8	0.192	25.19		84.42	0.522	51.1
	84.13	0.052	25.66		88.24	0.53	62.56
	82.93	0.08	30.73		78.22	0.65	63.24
	78.31	0.18	37.87		83.49	0.632	59.79
	87.29	0.16	32.08		81.66	0.64	62.41
	83.97	0.12	26.6		91.44	0.552	64.7
	77.91	0.14	32.27		81.35	0.602	59.86
	89.55	0.13	21.81		85.17	0.522	61.63
	80.97	0.05	22.02		75.33	0.512	55.08
	87.79	0.15	26.62		85.6	0.472	47.76
	89.89	0.082	37.22		83.22	0.55	62.66
	78.67	0.13	36.15		77.48	0.46	47.14
	79.39	0.05	21.99		76.94	0.632	58.1
	81	0.08	22.94		78.53	0.522	47.75
	82.37	0.09	33.09		82.88	0.472	56.59
	89.34	0.192	28.87		77.14	0.59	47.06
	89.77	0.1	25.98		84.77	0.532	59.58
	81.33	0.06	25.97		89.1	0.602	61.46
	88.24	0.142	34.81		75.17	0.572	58.52
	88.33	0.09	24.47		83	0.602	53.51
	78.87	0.17	22.8		80.88	0.57	47.22
	80.19	0.11	29.24		91.24	0.53	62.5
	77.38	0.192	32.19		88.94	0.6	63.36
	80.44	0.142	32.02		84.5	0.532	59.52
	83.39	0.17	31.08		89.66	0.592	48.97
	83.05	0.08	20.24		90.86	0.542	48.08
	80.09	0.092	22.09		84.44	0.6	49.66
	88.04	0.19	34.91		90.92	0.612	59.99
	84.68	0.102	30.02		89.34	0.62	53.33
	87.02	0.09	23.39		90.63	0.632	56.91
	79.52	0.062	22		81.1	0.492	62.88
	80.03	0.13	33.24		86.99	0.532	61.7
	77.81	0.052	23.63		90.26	0.642	50.21
	87.7	0.14	31.7		84.43	0.55	48.27
	86.19	0.13	30.8		83.46	0.542	52.38
	78.28	0.09	33.8		90.22	0.64	51.16
	88.75	0.09	28.98		81.78	0.61	48.98
	89.76	0.15	25.41		79.37	0.482	64.65
	85.4	0.172	27.48		89.97	0.492	59.31
	88.2	0.182	25.89		89.65	0.59	55.09
	82.47	0.132	31.41		83.2	0.53	63.24
	82.4	0.092	33.11		78.04	0.63	60.19
	80.7	0.132	32.88		91.57	0.61	50.44
	83.67	0.122	36.11		82.73	0.532	62.45
	80.34	0.19	33.82		85.66	0.582	52.32
	81.12	0.062	36.58		87.87	0.47	52.46
	84.08	0.15	36.52		75.47	0.522	55.17
	84.48	0.152	36.33		75.4	0.632	61.42
	87.07	0.112	31.13		89.7	0.552	53.47
	78.31	0.172	27.05		82.24	0.61	50.11
	84.99	0.17	22.76		82.47	0.612	59.58
	82.36	0.14	36.75		75.65	0.52	54.27
	88.03	0.13	37.85		91.02	0.54	58.83
	79.88	0.162	37.52		77.65	0.522	50.89
	79.14	0.14	29.53		76.13	0.48	49.11
	79.51	0.07	25.04		84.79	0.462	54.5
	83.51	0.17	25.32		81.13	0.482	54.2
	79.72	0.162	31.96		75.46	0.632	49.9
	86.41	0.11	36.83		79.35	0.472	54.63
	85.48	0.12	21.24		81.29	0.642	48.23
	81.8	0.1	22.67		83.4	0.592	64.5
	80.74	0.142	25.17		88.46	0.51	53.38
	83.17	0.052	32.03		82.83	0.582	62.72
	83.84	0.06	30.39		89.33	0.532	57.56
	82.07	0.11	36.84		82.94	0.63	61.03
	79.17	0.07	24.61		78.6	0.49	60.76
	84.76	0.14	23.08		86.76	0.63	51.58
	87.31	0.092	23.67		82.94	0.53	54.15
	76.94	0.142	24.1		77.38	0.582	54.88
	85.23	0.13	21.67		79.87	0.49	48.44
	89.85	0.16	24.59		84.51	0.57	57.92
	77.86	0.12	28.26		80.02	0.48	57.57
	84.9	0.122	37.2		83.54	0.63	48.33
	87.17	0.13	27.52		77.95	0.602	57.88
	83.69	0.062	27.7		79.2	0.592	48.54
	89.82	0.092	31.61		79.34	0.572	50.55
	84.27	0.11	27.98		90.47	0.462	48.89
	82.43	0.132	27.1		76.45	0.57	60.88
	89.8	0.112	30.57		78.06	0.5	63.93
	81.37	0.162	23.27		83.51	0.61	63.13
	85.94	0.11	34.74		90.44	0.462	64.77
	88.76	0.16	35.82		76.28	0.46	61.9
	83.77	0.162	22.64		86.16	0.6	52.77
	77.64	0.1	24.67		80.63	0.542	54.27
	83.38	0.132	30.02		85.49	0.62	50.59
	88.18	0.132	32.7		81.63	0.532	59.26
	88.65	0.11	34.31		85.62	0.5	50.78
	85.1	0.172	22.55		83.24	0.542	48.23
	84.58	0.152	30.24		86.08	0.602	48.79
	82.55	0.18	21.26		86.34	0.5	62.12
	78.21	0.05	28.35		75.19	0.452	52.31
	76.98	0.142	22.44		91.07	0.462	59.49
	82.32	0.062	28.39		85.49	0.55	54.63
	88.15	0.17	24.46		90.63	0.52	59.28
	84.29	0.172	36.28		84.48	0.482	64.49
	88.18	0.17	27.89		85.82	0.57	47.1
	85.04	0.13	36.88		79.49	0.58	57.2
	82.63	0.19	26.29		86.97	0.49	64.39
	86.82	0.062	22.02		88.73	0.592	49.34
	87.3	0.062	23.79		78.05	0.65	62.39
	88.98	0.18	30.13		83.3	0.57	49.28
	87.42	0.142	32.53		83.13	0.522	63.19
	77.02	0.122	20.81		78.72	0.59	60.57
	77.69	0.182	22.7		79.34	0.602	52.88
	86.37	0.14	24.73		89.53	0.572	59.66
	79.19	0.092	22.56		91.62	0.592	59.9
	79.65	0.18	36.42		77.19	0.522	62.74
	79.14	0.172	24.61		76.52	0.56	48.86
	89.86	0.16	24.95		88.52	0.56	56.41
	89.51	0.092	35.83		75.62	0.56	64.24
	81.28	0.162	20.74		84.44	0.612	51.5
	87.29	0.102	35.23		82.27	0.542	53.02
	78.38	0.1	20.98		81.78	0.6	51.29
	76.96	0.112	31.61		86.3	0.48	60.39
	80.1	0.18	29.8		85.97	0.582	59.01
	82.81	0.06	31.21		77.1	0.59	59
	84.58	0.13	23.91		89.85	0.602	61.21
	81.05	0.112	29.09		75.31	0.502	50.57
	85.91	0.072	20.33		82.54	0.542	48.4
	88.12	0.06	21.88		84.89	0.622	51.95
	88.25	0.14	35.37		80.39	0.6	62.5
	80.24	0.052	20.19		81.37	0.472	55.34
	86.95	0.15	22.07		86.66	0.572	50.56
	88.86	0.052	24.58		76.64	0.56	47.26
	76.88	0.05	29.27		78.38	0.55	55.41
	81.81	0.142	33.21		77.31	0.512	56.87
	86.17	0.182	24.77		80.37	0.562	53.11
	89.17	0.162	30.81		79.25	0.562	47.04
	82.71	0.182	24.42		90.3	0.57	56.01
	77.34	0.182	20.45		87.46	0.552	52.29
	79.08	0.19	26.22		78.91	0.602	52.84
	77.58	0.142	25.42		89.86	0.51	57.63
	84.44	0.12	22.7		89.7	0.482	57.51
	77.8	0.08	25.33		81.29	0.552	53.08
	86.41	0.06	27.56		89.74	0.51	63.36
	84.73	0.14	23.41		76.91	0.642	59.49
	81.48	0.12	24.8		84.83	0.642	57.04
	79.08	0.182	36.58		89.91	0.492	64.28
	82.86	0.152	32.83		78.13	0.48	64.98
	83.23	0.092	27.4		75.74	0.6	62.46
	86.8	0.132	32.51		92.13	0.57	55.11
	77.89	0.18	34.38		78.41	0.512	49.25
	81.96	0.05	37.22		82.24	0.502	49.87
	80.39	0.15	37.72		91.34	0.5	48.96
	76.88	0.11	26.7		90.05	0.562	59.19
	77.48	0.17	35.47		88.8	0.61	47.2
	89.16	0.082	37.42		88.89	0.49	48.11
	79.66	0.12	32		78.33	0.472	51.35
	87.19	0.05	36.5		83.57	0.502	48.57
	78.62	0.182	21.61		76.69	0.56	51.02
	79.38	0.072	24.1		82.24	0.522	57.22
	78.8	0.17	21.46		82.49	0.592	50.74
	87.54	0.1	26.15		85.51	0.512	63.55
	84.01	0.18	33.84		75.56	0.54	50.57
	82.75	0.12	20.31		77.17	0.59	57.76
	80.18	0.19	31.18		78.8	0.622	50.68
	76.91	0.152	33.49		91.41	0.532	64.34
	86.37	0.17	25.87		85.37	0.542	62.84
	79.54	0.08	22.57		89.29	0.572	51.53
	88.79	0.122	23.15		89.4	0.51	60
	82.04	0.06	35.03		84.23	0.482	53.81
	77.06	0.052	29.34		91.92	0.552	47.11
	86.97	0.19	29.86		83.97	0.542	51.46
	80.22	0.06	29.43		77.63	0.632	47.73
	79.3	0.132	34.45		88.72	0.55	49.26
	87.82	0.12	37.7		86.88	0.61	64.53
	85.81	0.162	25.58		83.22	0.502	52.7
	81.35	0.17	26.95		84.81	0.562	48.01
	79.95	0.13	26.13		83.5	0.522	48.76
	89.58	0.09	29.72		78.12	0.59	53.15
	89.81	0.112	23.42		84.45	0.522	50.51
	79.09	0.14	22.96		80.4	0.602	61.93
	80.16	0.17	34.6		85.01	0.642	51.08
	79.33	0.09	23.76		84.19	0.482	62.09
	89.32	0.152	20.2		87.18	0.57	57.47
	79.19	0.142	21.35		91.21	0.472	47.47
	81.44	0.07	27.62		88.91	0.582	62.82
	77.82	0.052	32.77		92.11	0.62	63.78
	85.87	0.05	35.27		85.12	0.532	50.09
	78.52	0.09	27.96		77.76	0.512	57.74
	80.1	0.112	24.34		85.81	0.64	47.56
	81.14	0.172	32.96		77.31	0.48	64.46
	86.69	0.09	23.71		87.79	0.64	55.23
	87.72	0.102	24.57		84.96	0.63	56.41
	80.08	0.13	29.53		86.3	0.5	60.36
	83.25	0.132	24		79.35	0.512	52.33
	84.97	0.112	33.53		77.68	0.56	54.03
	88.16	0.16	29.3		84.96	0.522	48.32
	89.14	0.102	29.91		80.96	0.48	56.44
	84.13	0.13	29.39		75.31	0.472	64.71
	89.07	0.092	26.04		84.59	0.49	57.29
	82.36	0.19	34.75		80.37	0.592	50.68
	83.95	0.172	26.84		77.5	0.6	55.08
	80.82	0.07	33.77		76.76	0.56	54.38
	87.88	0.08	33.62		75.11	0.602	48.19
	78.76	0.092	31.18		85.35	0.602	58.59
	82.87	0.12	27.21		82.33	0.582	51.19
	85.28	0.16	34.39		90.68	0.592	55.2
	81.25	0.092	31.71		88.96	0.482	48.49
	77.87	0.12	22.37		77.37	0.48	62.93
	84.16	0.06	35.93		87.01	0.642	54.22
	88.23	0.142	20.81		83.9	0.62	56.21
	84.31	0.09	37.13		80.6	0.532	63.55
	88.74	0.132	20.47		91.43	0.5	47.42
	82.24	0.16	27.78		86.59	0.53	50.55
	77.79	0.16	25.8		89.75	0.522	56.6
	80.75	0.072	31.83		90.93	0.622	62.91
	87.91	0.142	27.95		83.45	0.562	56.86
	79.73	0.152	36.13		82.04	0.64	50.17
	79.18	0.07	32.17		89.86	0.55	53.23
	86.67	0.182	29.63		75.62	0.452	62.8
	78.88	0.192	29.98		84.38	0.47	56.5
	86.99	0.152	25.75		79.88	0.64	52.64
	77.72	0.132	29.88		86.26	0.572	55.63
	80.93	0.132	34.34		76.11	0.512	61.63
	79.11	0.16	20.15		86.65	0.522	63.4
	80.36	0.062	24.29		82.31	0.59	63.4
	89.42	0.15	31.1		77.07	0.62	47.89
	87.74	0.182	28.38		81.7	0.51	48.77
	77.57	0.17	26.63		81.94	0.58	54.11
	82.57	0.082	34.61		85.03	0.582	51.39
	79.05	0.17	23.55		91.32	0.49	61.06
	86.74	0.12	34.8		91.93	0.46	60.78
	84.08	0.14	22.11		83.81	0.58	50.16
	79.77	0.05	36.54		75.42	0.59	55.96
	79.56	0.11	22.46		85.1	0.562	64.42
	83.19	0.09	32.89		81.38	0.56	47.05
	85.52	0.12	28.63		76.99	0.612	57.99
	79.2	0.13	24.18		85.39	0.56	53.38
	85.5	0.13	33.74		86.05	0.65	56.42
	89.67	0.18	35.57		90.21	0.522	49.11
	82.29	0.072	36.77		75.18	0.482	47.52
	81.63	0.09	27.06		83.46	0.522	53.78
	88.53	0.14	35.14		84.64	0.57	62.73
	84.77	0.16	35.83		87.29	0.64	61.87
	89.15	0.082	29.76		84.6	0.48	56.3
	81.01	0.17	20.7		83.13	0.622	53.68
	89.29	0.08	21.12		75.83	0.552	50.26
	84.84	0.122	29.44		84.25	0.58	58.94
	88.83	0.11	34.53		82.57	0.532	52.11
	79.09	0.182	33.3		82.56	0.55	61.94
	81.88	0.07	27.47		85.36	0.63	48.07
	78.98	0.162	34.83		88.42	0.6	53.46
	87.36	0.15	22.02		76.47	0.562	56.66
	80.15	0.06	23.37		78.63	0.56	56.22
	88.18	0.09	25.46		81.41	0.472	55.06
	89.99	0.12	22.67		76.65	0.65	51.31
	77.83	0.162	37.9		78.06	0.51	50.07
	80.53	0.13	28.09		87.68	0.46	49.23
	83.76	0.11	29.34		83.3	0.51	54.88
	78.08	0.132	37.09		88.03	0.512	48.37
	83.3	0.152	31.46		84.83	0.622	51.63
	80.54	0.14	37.23		86.07	0.502	47.85
	77.48	0.062	25		92.09	0.482	51.72
	85.25	0.092	22.04		75.56	0.592	55.71
	89.1	0.102	22.37		78.58	0.57	60.04
	80.34	0.06	32.45		76.86	0.492	63.27
	77.19	0.072	27.13		88.18	0.642	60.52
	78.63	0.152	35.83		75.79	0.51	60.62
	84.35	0.122	32.93		92.19	0.55	50.81
	85.03	0.162	25.64		90.11	0.6	53.26
	88.72	0.122	28.47		80.15	0.492	56.47
	81.49	0.102	27.86		91.86	0.542	62.91
	82.13	0.112	37.61		81.53	0.542	60.89
	82.83	0.172	34.87		84.18	0.56	50.98
	85.15	0.19	30.8		89.06	0.602	47.33
	82.39	0.13	20.76		79.63	0.612	53.15
	83.1	0.162	20.56		83.24	0.612	58.45
	88.05	0.142	31.2		79.21	0.492	63.53
	82.4	0.092	35.06		85.71	0.522	60.34
	83.22	0.07	32.16		87.67	0.55	59.36
	82.86	0.09	26.59		81.77	0.6	57.82
	78.29	0.052	22.51		82.09	0.64	61.17
	86.75	0.08	25.04		75.03	0.46	60.8
	86.64	0.18	33.04		83.13	0.53	55.51
	77.6	0.09	21.41		91.83	0.52	49.32
	88.65	0.092	29.45		78.26	0.492	54
	78.2	0.1	30.13		79.53	0.5	61.72
	86.62	0.082	32.23		76.6	0.57	52.07
	80.09	0.122	22.03		81.39	0.552	60.74
	86.08	0.17	37.56		75.81	0.472	52.09
	89.14	0.092	23.77		84.91	0.532	63.5
	85.37	0.07	24.2		75.5	0.52	48.84
	78.92	0.08	29.81		75.63	0.562	61.02
	78.04	0.07	22.4		81.96	0.522	61.8
	81.01	0.102	22.79		91.82	0.512	64.12
	87.51	0.1	26.26		76.05	0.622	54.49
	79.47	0.052	21.49		92.15	0.622	47.62
	77.13	0.11	37.7		79.7	0.58	64.44
	86.38	0.122	35.23		85.26	0.57	48.76
	82.04	0.17	30.29		84.18	0.562	48.17
	88.46	0.112	20.53		77.47	0.64	63.78
	77.26	0.11	20.22		88	0.612	56.08
	89.65	0.14	22.22		77.57	0.642	54.2
	83.61	0.13	24.25		83.59	0.64	49.98
	80.17	0.1	31.59		75.72	0.592	60.95
	79.24	0.122	28.67		75.8	0.58	61.29
	82.98	0.172	24.43		75.16	0.46	54.11
	80.05	0.06	32.96		82.78	0.58	57.17
	86.39	0.11	37.02		86.97	0.56	64.81
	77.24	0.172	36.75		82.37	0.592	60.29
	81.03	0.132	24.96		87.76	0.62	57.03
	78.51	0.182	29.43		90.6	0.492	60.84
	77.28	0.062	30.72		90.46	0.612	51.41
	88.52	0.11	36.69		91.58	0.63	50.66
	85.14	0.082	20.61		91.45	0.62	63.5
	85.96	0.05	28.48		81.5	0.58	64.53
	81.05	0.112	35.31		87.41	0.6	51.86
	77.02	0.15	34.23		85.61	0.542	47.39
	79.83	0.062	24.71		87.69	0.64	51.71
	85.23	0.132	28.03		85.96	0.6	49.38
	85.45	0.132	22.31		80.21	0.532	64.9
	85.57	0.07	36.6		85.06	0.6	56.68
	87.44	0.11	23.37		87.51	0.462	61.06
	86.83	0.142	23.89		89.47	0.61	64.49
	84.84	0.1	34.62		83.86	0.47	57.92
	77.68	0.112	30.4		85.54	0.572	56.44
	82.01	0.052	32.11		84.28	0.542	58.53
	87.61	0.162	27.88		75.47	0.612	59.93
	88.3	0.06	30.03		78.1	0.472	57.93
	86.89	0.152	28.34		91.11	0.592	61.78
	86.56	0.072	20.5		83.41	0.6	60.75
	88.61	0.172	29.03		79.1	0.58	63.73
	89.04	0.122	22.78		83.15	0.592	62.8
	89.82	0.09	36.32		84.37	0.59	60.55
	79.39	0.092	20.19		85.81	0.51	52.62
	89.37	0.062	34.42		92.16	0.622	63.61
	87.05	0.072	21.42		85.95	0.62	48.27
	88.35	0.09	31.33		82.78	0.63	49.85
	88.33	0.082	33.81		84.67	0.49	59.55
	83.37	0.082	30.33		83.22	0.64	47.13
	78.17	0.1	31.75		85.24	0.592	48.84
	86.83	0.082	31.67		75.67	0.522	50.1
	88.61	0.07	25.81		80.5	0.482	59.56
	78.21	0.19	29.02		76.71	0.47	57.78
	79.38	0.09	33.49		84.77	0.502	53.98
	77.33	0.07	31.14		90.98	0.472	58.07
	77.37	0.172	32.18		82.6	0.482	57.94
	88.21	0.132	26.9		89.94	0.612	56.68
	88.16	0.16	25.05		89.18	0.6	56.89
	88.27	0.09	34.72		75.58	0.52	62.06
	85.43	0.192	22.18		84.03	0.502	64.71
	84.59	0.17	37.33		86.46	0.56	50.61
	89.33	0.11	27.16		84.96	0.55	54.05
	80.27	0.152	31.42		83.9	0.52	64.03
	82.76	0.15	23.62		85.46	0.64	51.3
	78.96	0.06	25.37		87.22	0.55	59.21
	79.14	0.11	32.92		86.04	0.59	51.1
	77.84	0.162	25.14		79.42	0.57	55.29
	87.6	0.092	31.69		88.68	0.552	64.41
	81.93	0.102	30.78		84.72	0.602	53.74
	84.99	0.182	23.9		75.07	0.59	63.95
	79.26	0.052	20.71		76.35	0.54	48.58
	79.79	0.162	20.56		85.1	0.492	59.87
	78.01	0.18	36.18		88.91	0.512	54.08
	86.97	0.082	21.09		90.82	0.622	61.75
	80.47	0.182	34.91		76.29	0.482	48.49
	77.31	0.09	31.93		77.29	0.522	62.26
	89.88	0.12	27.85		77.26	0.522	55.53
	84.95	0.15	35.22		76.77	0.49	58.65
	77.08	0.06	30.31		81.69	0.522	50.02
	78.88	0.11	28.78		77.43	0.612	63.15
	81.76	0.14	35.34		75.88	0.582	64.32
	81.22	0.15	34.47		87.53	0.46	56.82
	87.89	0.192	34.59		85.44	0.642	52.97
	86.82	0.13	23.14		84.6	0.57	52.42
	83.34	0.102	27.41		79.45	0.49	59.54
	81.52	0.09	27.83		83.04	0.59	64.94
	80.35	0.172	28.91		75.42	0.5	48.77
	85.33	0.052	31.75		75.7	0.51	61.19
	87.2	0.11	23.25		86.43	0.58	63.77
	77.07	0.18	33.84		87.5	0.65	50.64
	79.45	0.12	26.21		86.36	0.592	61.69
	80.58	0.18	24.53		77.77	0.532	48.06
	80.92	0.132	37.39		85.05	0.49	57.2
	81.26	0.162	28.76		78	0.47	51.05
	82.94	0.092	26.72		81.91	0.62	54.91
	87.98	0.192	28.84		75.75	0.54	48.04
	82.72	0.16	27.94		83.32	0.5	63.12
	88.69	0.16	22.68		81.49	0.54	60.33
	80.5	0.09	20.75		88.34	0.542	63.64
	78.5	0.142	23.03		79.26	0.582	51.93
	85.24	0.122	37.64		83.2	0.522	48.17
	85.88	0.172	26.94		91.03	0.48	55.56
	88.94	0.102	37		86.35	0.622	59.25
	84.47	0.19	26.07		82.22	0.49	59.62
	85.78	0.152	27.87		87.78	0.642	64.72
	84.74	0.162	21.67		75.46	0.46	53.25
	80.5	0.122	30.41		79.24	0.49	58.77
	84.83	0.11	37.62		89.34	0.522	59.14
	84.5	0.07	21.82		81.04	0.49	61.19
	89.74	0.12	23.74		81.46	0.612	63.12
	80.98	0.132	35.59		89.3	0.512	54.21
	81.6	0.08	21.8		77.04	0.622	63.51
	87.35	0.13	37.95		82.27	0.56	64.47
	84.15	0.07	34.46		77.07	0.57	55.35
	84.69	0.102	37.33		83.81	0.61	60.45
	77.03	0.17	29.22		78.24	0.61	58.63
	86.37	0.19	20.88		75.02	0.63	49.24
	89.93	0.1	34.3		88.33	0.56	61.02
	82.71	0.052	35.11		80.62	0.502	49.91
	88.87	0.112	37.66		75.5	0.482	52.02
	84.79	0.112	22.01		79.02	0.46	59.17
	88.44	0.14	22.8		82.74	0.63	63.43
	78.19	0.15	37.35		82.09	0.592	52.9
	80.18	0.07	24.97		91.02	0.462	60.86
	82.3	0.072	28.19		86.15	0.54	49.18
	78.96	0.17	25.54		81.84	0.56	50.43
	76.94	0.072	25.23		81.04	0.63	51.16
	86.22	0.112	28.25		82.29	0.522	52.17
	86.46	0.092	26.98		92.07	0.47	57.36
	82.17	0.17	20.09		87.8	0.6	55.52
	76.81	0.12	22.18		84.93	0.48	62.38
	81.15	0.13	23.44		81.24	0.522	53.3
	85.27	0.09	24.16		77.84	0.592	51.47
	85.1	0.11	33.54		75.76	0.55	62.75
	78.91	0.102	30.83		88.23	0.472	47.62
	89.55	0.11	26.7		79.06	0.492	56.94
	82.25	0.172	37.02		79.04	0.51	55.38
	85.13	0.18	22.22		79.35	0.622	62.43
	78.89	0.112	23.19		81.48	0.46	52.99
	81.52	0.182	26.51		83.1	0.61	63.02
	87.49	0.092	29.54		83.48	0.5	48.59
	77.4	0.17	28.02		83.69	0.612	59.71
	86.03	0.1	20.04		85.16	0.59	48.55
	83.94	0.14	22.08		85.97	0.56	61.07
	85.13	0.132	27.32		84.88	0.462	52.01
	81.66	0.13	25.23		76.16	0.58	47.46
	81.04	0.182	24.75		84.04	0.622	53.07
	76.84	0.142	23.82		82.77	0.602	53.17
	80.61	0.192	23.35		84.6	0.592	56.49
	83.32	0.07	21.23		76.96	0.562	57.39
	80.49	0.182	31.57		83.42	0.63	50.3
	85.42	0.132	32.71		89.47	0.542	52.08
	77.46	0.152	32.69		84.44	0.492	48.3
	80.49	0.142	21.81		88.95	0.562	58.02
	77.15	0.052	33.67		83.54	0.49	63.09
	81.58	0.12	23.88		75.15	0.52	50.53
	86.24	0.07	27.31		86.89	0.55	49.18
	80.69	0.052	34.49		76.98	0.54	54.55
	84.52	0.1	21.66		78.35	0.48	60.62
	80.4	0.072	23		80.82	0.55	53.21
	80.44	0.08	32.43		86.56	0.612	63.29
	86.82	0.09	27.82		76.11	0.472	62.01
	89.03	0.052	31.3		88.05	0.452	60.43
	77.79	0.12	22.66		81.53	0.602	56.46
	77.59	0.192	23.89		76.34	0.572	61.71
	79.86	0.16	36.26		77.05	0.522	48.01
	86.44	0.132	26.38		86.32	0.492	56.81
	89.22	0.082	31.33		84.63	0.622	58.34
	87.64	0.09	34.32		87.2	0.632	60.95
	78.01	0.052	26.05		78.39	0.492	56.79
	81.63	0.12	31.53		76.5	0.56	61.44
	87.12	0.1	32.73		77.09	0.512	59.46
	79.54	0.052	36.5		91.92	0.6	58.31
	87.2	0.092	30.66		86.56	0.632	61.69
	83.04	0.152	22.13		88.98	0.472	63.68
	78.4	0.13	22.13		78.74	0.62	58.64
	77.95	0.192	37.38		91.06	0.462	61.31
	77.42	0.15	35.87		75.88	0.582	51.75
	80.6	0.172	25.98		76.21	0.48	51.82
	81.47	0.11	28.3		85.45	0.54	51.33
	77.28	0.17	37.16		75.46	0.622	51.83
	78.86	0.15	33.58		75.93	0.472	49.15
	85.26	0.182	32.39		89.67	0.602	50.56
	76.95	0.092	32.12		82.17	0.53	49.99
	78.3	0.132	31.07		83.56	0.542	51.58
	80.13	0.112	25.45		81.1	0.592	51.27
	89.11	0.102	27.95		88.86	0.502	64.98
	78.84	0.082	21.3		80.37	0.632	56.56
	78.75	0.112	20.5		76.81	0.582	49.39
	85.05	0.102	21.77		88.96	0.61	49.42
	85.86	0.152	30.05		90.89	0.472	52.88
	87.77	0.09	25.03		89.75	0.54	47.74
	84.06	0.17	28.59		89.26	0.492	59.93
	89.49	0.16	31.24		79.84	0.572	49.85
	77.81	0.062	31.33		75.68	0.522	51.76
	87.15	0.16	31.92		81.84	0.49	51.46
	78.09	0.15	24.16		91	0.58	62.45
	78.28	0.13	34.42		85.76	0.462	52.57
	79.21	0.15	31.86		76.37	0.54	59.77
	81.61	0.122	22.2		87.21	0.602	55.6
	78.1	0.112	20.62		85.24	0.49	55.92
	79.53	0.16	37.19		80.4	0.552	51.45
	89.63	0.09	25.32		79.42	0.492	49.89
	89.42	0.172	24.7		78.87	0.502	55.13
	87.74	0.072	32.37		80.3	0.5	53.45
	77.99	0.182	26.65		77.77	0.622	61.47
	85.74	0.052	37.72		82.41	0.562	51.71
	86.36	0.1	31.36		80.36	0.52	58.82
	84.38	0.06	27.59		76.15	0.5	49.57
	88.17	0.132	37.24		89.12	0.492	62.04
	86.92	0.162	37.19		79.68	0.54	60.07
	88.77	0.13	27.41		88.57	0.542	52.09
	85	0.052	29.92		86.6	0.61	48.73
	77.88	0.19	31.5		82.22	0.49	52.7
	82.38	0.172	24.15		81.13	0.59	64.93
	86.15	0.072	23.85		88.04	0.492	56.46
	86.05	0.192	21.55		82.15	0.57	54.71
	79.86	0.13	26.63		85.39	0.58	61.71
	79.73	0.112	32.02		87.3	0.562	48.36
	80.14	0.09	31.81		81.38	0.51	48.08
	87.75	0.13	27.57		86.63	0.61	61.98
	87.7	0.17	23.95		81.93	0.61	52.29
	85.28	0.082	37.34		88.28	0.6	64.15
	80.52	0.112	25.68		76.34	0.612	53.43
	77.65	0.082	31.78		79.26	0.48	60.24
	79.47	0.11	32.37		79.26	0.582	58.35
	79.75	0.13	28.68		82.3	0.512	49.89
	78.34	0.112	36.33		82.14	0.63	49.67
	88.73	0.152	20.18		85.12	0.632	54.81
	87.11	0.102	33.66		84.59	0.572	58.7
	81.58	0.142	26.52		75.43	0.54	59.43
	88.79	0.062	25.31		81.68	0.49	54.44
	89.85	0.08	22.36		89.98	0.51	58.88
	83.43	0.11	20.27		81.03	0.49	48.24
	85.82	0.062	36.92		83.32	0.482	58.68
	87.53	0.112	32.78		88.18	0.602	49.53
	84.13	0.14	34.25		83.81	0.48	62.65
	86.4	0.112	20.76		89.05	0.55	48.2
	76.84	0.112	22.36		80.88	0.52	47.61
	82.79	0.18	32.46		88.17	0.572	55.85
	85.58	0.09	35.43		76.76	0.642	62.1
	86.35	0.06	35.35		91.26	0.452	55.01
	88.56	0.18	34.82		75.6	0.59	55
	82.59	0.142	37.27		75.03	0.49	52.51
	88.95	0.11	23.09		89.17	0.552	52.49
	83.6	0.1	31.42		81.66	0.562	51.72
	84.81	0.05	34.38		87.03	0.48	55.37
	79.87	0.132	37		88.43	0.52	55.91
	81.14	0.11	33.45		87.16	0.492	52.19
	79.3	0.17	36.6		86.91	0.632	61.05
	88.45	0.17	21.81		88.77	0.532	48.87
	81.83	0.072	36.72		85.01	0.54	48.22
	84.74	0.092	22.9		85.33	0.55	52.81
	89.24	0.152	28.55		80.76	0.57	58.39
	77.07	0.182	28.08		87.74	0.632	63.06
	88.62	0.162	25.63		83.88	0.492	64.9
	78.34	0.072	36.74		77.58	0.48	62.81
	85.56	0.12	33.67		84.69	0.5	51.24
	77.56	0.102	29.63		85.33	0.64	63.71
	78.31	0.082	27.36		77.58	0.49	52.67
	89.76	0.07	29.68		85.67	0.59	61.85
	83.72	0.17	24.64		84.58	0.49	62.27
	80.32	0.15	25.35		82.35	0.62	47.54
	81.07	0.132	31.58		78.05	0.462	52.6
	89.32	0.09	27.39		83.38	0.602	59.75
	77.38	0.08	23.62		88.43	0.5	56.37
	87.99	0.072	21.62		84.3	0.53	49.72
	76.99	0.08	24.82		89.39	0.5	63.91
	89.97	0.06	32.92		76.96	0.62	50.11
	88.83	0.112	34		89.28	0.59	53.35
	84.86	0.152	33.92		77.86	0.58	51.14
	79.17	0.12	24.7		78.29	0.562	58.03
	77	0.072	21.16		77.75	0.612	51.85
	84.94	0.112	36.25		83.07	0.64	61.25
	88.46	0.17	34.47		87.31	0.53	53.38
	81.04	0.15	22.17		79.19	0.64	61.69
	79.65	0.162	37.62		83.65	0.49	64.5
	89.09	0.17	37.95		91.14	0.612	62.18
	81.01	0.182	27.71		91.05	0.49	58.95
	86.97	0.112	25.74		88.21	0.48	47.53
	79.51	0.09	27.22		87.3	0.542	59.4
	87.07	0.18	23.94		80.49	0.472	54.33
	79.02	0.19	24.98		90.83	0.51	54.46
	78.38	0.142	29.66		76.78	0.54	57.33
	83.57	0.172	32.87		77.39	0.62	53.69
	76.91	0.13	26.36		75.08	0.572	53.51
	83.72	0.142	22.84		80.25	0.542	56.02
	88.24	0.12	26.32		81.03	0.542	63.01
	81.38	0.07	35.33		79.38	0.62	48.53
	78.04	0.102	33.06		81.47	0.6	59.75
	79.07	0.11	26.99		79.73	0.54	53.38
	81.62	0.142	33.1		85.52	0.572	50.38
	84.68	0.142	35.72		85.68	0.592	61.34
	86.46	0.1	36.33		87.99	0.482	60.74
	82.43	0.11	25.33		80.07	0.5	63.54
	88.76	0.112	29.88		76.9	0.612	53.3
	87.5	0.07	30.24		83.15	0.512	50.17
	84.13	0.192	33.54		78.52	0.492	48.44
	80.26	0.162	25.14		91.7	0.482	48.41
	77.43	0.152	33.57		89.84	0.592	62.5
	84.78	0.11	32.47		90.73	0.58	55.74
	86.65	0.15	20.67		76.32	0.602	62.11
	79.33	0.152	35.99		78.68	0.61	49.89
	88.36	0.07	33.43		86.68	0.502	64.77
	89.79	0.072	25.99		79.52	0.61	59.97
	82.92	0.172	34.84		80.78	0.522	58.06
	81.07	0.182	25.46		84.41	0.582	56.66
	79.2	0.17	37.51		89.62	0.492	51.7
	81.01	0.052	23.28		89.36	0.58	54.09
	82.96	0.13	35.61		90.55	0.562	63.5
	85.1	0.14	23.52		80.78	0.622	59.64
	78.72	0.07	36.44		88.6	0.632	53.47
	78.66	0.102	23.89		75.65	0.59	49.69
	89.54	0.06	25.66		90.17	0.58	56.46
	86.91	0.152	32.89		83.33	0.572	60
	85.9	0.05	33.89		87.26	0.642	60.63
	79.75	0.12	22.35		88.08	0.64	59.13
	87.35	0.18	37.31		78.05	0.47	49.93
	77.58	0.092	37.5		87.82	0.642	56.38
	87.89	0.1	30.29		77.09	0.642	49.66
	77.64	0.122	22.02		83.38	0.542	59.88
	81.18	0.162	23.39		90.84	0.48	49.82
	88.93	0.172	37.21		88.87	0.51	62.47
	77.55	0.14	25.45		77.79	0.53	59.79
	88.15	0.182	22.59		85.28	0.51	56.94
	79.92	0.15	20.55		75.39	0.48	55.52
	80.48	0.112	20.46		86.93	0.642	61.6
	79.72	0.19	34.51		81.16	0.632	62.24
	78.08	0.112	28.15		78.84	0.542	51.51
	78.34	0.062	22.2		86.76	0.502	58.37
	79.27	0.1	37.89		88.09	0.53	50.25
	83.18	0.132	24.51		76.28	0.572	50.4
	79.16	0.132	30.94		87.65	0.532	47.12
	76.82	0.08	28.09		90.95	0.462	50.27
	89.66	0.07	33.56		90.45	0.61	49.41
	77.15	0.16	25.54		76.8	0.58	47.93
	87.7	0.15	21.48		81.05	0.56	56.69
	80.45	0.08	33.18		78.24	0.55	53.58
	84.01	0.16	31.6		82.77	0.622	63.15
	86.92	0.092	23.13		77.6	0.61	57.22
	86.3	0.112	32.36		89.64	0.632	55
	78.07	0.11	37.06		80.79	0.552	51.38
	88.87	0.052	23.24		89.56	0.582	59.74
	89.24	0.172	26.37		86.11	0.64	48.54
	88.04	0.172	35.36		90.49	0.562	50.24
	77.01	0.19	34.46		90.37	0.472	51.97
	88.77	0.09	32.54		87.2	0.602	61.69
	78.54	0.05	37.11		86.27	0.632	57.33
	86.76	0.142	21.73		85.21	0.64	48.12
	85.72	0.18	33.67		86.9	0.622	63.24
	79.45	0.192	35.82		82.96	0.48	59.59
	86.39	0.17	23.39		81.94	0.562	62.51
	87.22	0.1	36.78		84.07	0.462	55.11
	82.7	0.17	35.15		84.29	0.522	53.99
	84.35	0.112	28.01		76	0.47	55
	80.68	0.17	22.26		89.13	0.57	47.42
	77.34	0.132	24.35		89.85	0.452	64.42
	87.74	0.172	27.87		89.7	0.47	52.64
	83.45	0.14	29.54		90.56	0.48	50.98
	85.42	0.18	21.2		84.79	0.59	54.49
	88.35	0.142	35.53		81.04	0.5	53.64
	89.28	0.072	36.45		87.6	0.64	55.48
	89.1	0.16	35.64		78.58	0.5	57.83
	82.64	0.1	33.42		90.08	0.5	52.3
	84.76	0.09	28.77		75.74	0.522	56.46
	81.02	0.14	28.97		81.9	0.52	63.05
	87.85	0.05	33.01		85.42	0.54	50.06
	85.95	0.102	37.55		85.56	0.562	51.21
	77.79	0.152	32.62		90.3	0.57	59.48
	89.56	0.17	28.72		75.72	0.63	50.58
	78.23	0.122	29.24		77.21	0.562	48.2
	86.27	0.052	28.11		80.12	0.522	63.75
	87.84	0.102	22.2		77.64	0.59	61.2
	84.59	0.082	36.92		78.33	0.55	62.07
	77.18	0.052	20.85		75.98	0.52	52.98
	80.68	0.1	27.6		80.33	0.65	55.08
	86.73	0.08	20.44		87.45	0.55	55.43
	89.1	0.152	35.85		83.89	0.64	54.17
	77.19	0.19	34.59		84.12	0.61	51.05
	87.19	0.062	34.38		80.91	0.592	47.3
	84.27	0.16	34.02		88.39	0.46	52.34
	86.77	0.19	31.08		91.59	0.53	60.43
	79.16	0.19	27.69		81.03	0.55	61.58
	89.97	0.142	35.63		88.14	0.6	55.17
	78.07	0.172	29.27		78.96	0.47	49.48
	80.79	0.09	29.74		76.59	0.51	59.75
	88.82	0.052	28.11		77.61	0.572	52.91
	77.3	0.1	23.71		83.55	0.5	59.4
	85.92	0.082	26.09		90.2	0.502	60.58
	86.61	0.06	36.02		78.36	0.54	50.4
	80.56	0.112	25.36		88.82	0.512	61.75
	81.34	0.162	24.08		91.94	0.59	60.1
	78.02	0.092	28.46		91.38	0.542	57.79
	80.92	0.162	21.74		84.4	0.6	50.67
	82.56	0.08	25.08		86.01	0.47	57.11
	85.98	0.192	31.23		81.89	0.63	64.44
	81.55	0.05	20.28		81.96	0.51	53.73
	83.82	0.052	32.49		85.52	0.59	63.6
	78.2	0.06	31.33		91.07	0.612	52.87
	84.83	0.08	26.65		91.04	0.6	50.66
	89.75	0.16	26.85		89.98	0.51	59.62
	84.68	0.13	36.14		89.87	0.552	57.24
	87.88	0.072	31.82		78.63	0.53	61.21
	83.89	0.092	27.81		82.18	0.57	51.5
	86.6	0.142	35.68		90.5	0.5	58.57
	79.51	0.082	24.59		89.5	0.5	59.58
	85.03	0.092	24.16		79.57	0.492	49.76
	77.43	0.082	25.7		85.16	0.492	64.96
	85.52	0.152	24.82		88.29	0.502	56.06
	77.94	0.112	20.22		84.42	0.472	52.27
	87.4	0.112	36.36		83.26	0.502	59.1
	79.62	0.14	29.26		84.83	0.462	62.98
	81.52	0.072	31.3		87.14	0.5	51.46
	81.93	0.072	30.28		76.69	0.532	54.49
	81.17	0.08	33.71		82.27	0.53	48.49
	85.33	0.122	24		80.09	0.65	49.82
	77.66	0.142	34.79		86.32	0.562	60.93
	84.43	0.12	28.73		83.74	0.58	53.55
	82.49	0.14	35.34		87.71	0.592	52.76
	78.95	0.172	27.86		85.37	0.62	53.18
	83.41	0.092	25.65		76.93	0.602	48.85
	84.76	0.132	30.77		84.78	0.612	48.79
	81.48	0.082	30.08		82.28	0.53	61.82
	82.56	0.162	24.41		83.44	0.572	60.3
	78.11	0.11	24.34		82.09	0.602	52.48
	89.74	0.122	23.97		91.35	0.552	51.77
	81.74	0.16	37.1		82.42	0.53	50.94
	84.7	0.19	34.08		79.75	0.52	58.22
	81.45	0.06	32.52		82.73	0.582	50.03
	78.78	0.06	24.06		82.24	0.54	58.05
	79.12	0.19	36.8		83.82	0.47	64.16
	78.18	0.1	26.51		82.34	0.59	56.15
	85.4	0.082	26.18		90.93	0.552	51.96
	89.02	0.112	35.22		75.51	0.462	57.26
	82.57	0.19	23.83		85.04	0.552	51.32
	88.48	0.19	33.75		88.4	0.462	64.36
	76.83	0.152	28.35		89.14	0.48	55.49
	84.38	0.122	24.11		82.79	0.552	49.5
	82.61	0.16	32.27		88.52	0.562	58.31
	86.04	0.19	35		81.91	0.592	62.35
	85.65	0.112	29.98		81.16	0.622	48.13
	79.41	0.132	34.84		87.54	0.5	53.53
	83.82	0.14	34.3		77.88	0.602	62.7
	79.69	0.09	21.45		82.32	0.452	50.41
	83.04	0.15	29.4		76.35	0.512	63.65
	88.04	0.19	23.14		86.37	0.56	60.39
	80.34	0.072	30.78		84.95	0.48	63.93
	88.93	0.132	26.32		82.83	0.472	61.25
	89.57	0.16	21.89		88.87	0.57	63.04
	81.69	0.13	25.24		88.83	0.472	54.36
	87.14	0.192	36.54		88.96	0.642	63.02
	88.02	0.052	33.7		86.18	0.6	55.22
	81.92	0.112	27.55		89.59	0.59	50.08
	77.84	0.112	34.58		87.79	0.55	56.46
	82.47	0.082	30.59		85.91	0.56	47.26
	82.57	0.062	26.45		91	0.46	61.93
	85.52	0.07	23.83		89.88	0.462	63.6
	85.35	0.102	31.97		80.55	0.582	48.46
	78.71	0.09	23.52		75.89	0.522	52.56
	86.2	0.132	37.29		76.33	0.58	63.44
	79.92	0.142	27.88		79.7	0.61	50.51
	81.28	0.08	23.41		85.31	0.51	55.14
	83.36	0.092	27.48		75.47	0.472	57.61
	89.54	0.11	34.75		86.91	0.622	55.19
	77.75	0.152	21.54		90.16	0.5	48.77
	81.07	0.16	22.52		79.55	0.58	56.76
	82.46	0.09	26.4		89.34	0.52	53.44
	84.87	0.16	33.9		83.04	0.472	59.35
	84.19	0.132	34.48		75.54	0.49	52.34
	85.76	0.15	30.58		90.18	0.482	50.39
	83.02	0.142	22.17		79.93	0.65	53.16
	82.56	0.13	24.79		81.49	0.64	64.06
	86.19	0.142	24.47		80.2	0.612	50.18
	84.92	0.152	30.52		77.22	0.51	64.91
	84.23	0.132	28.83		87.57	0.542	59.57
	83.24	0.15	23.5		88.45	0.492	53.6
	79.57	0.132	21.41		76.57	0.642	50.15
	86.5	0.172	28.66		79.52	0.592	61.91
	82.72	0.092	25.42		86.29	0.622	59.83
	87.9	0.19	27.79		79.02	0.512	61.86
	86.11	0.142	32.86		79.73	0.62	62.23
	87.21	0.152	34.45		78.6	0.532	49.54
	88.26	0.12	32.09		79.2	0.47	59.56
	87.03	0.192	28.65		89.33	0.56	51.42
	84.02	0.102	23.18		81.84	0.592	61.37
	77.93	0.07	32.25		88.81	0.48	61.71
	79.83	0.112	20.88		77.31	0.51	55.83
	78.23	0.142	20.39		91.79	0.58	48.82
	77.82	0.192	32.34		80.63	0.532	57.69
	88.43	0.152	29.72		78.31	0.54	56.8
	79.99	0.082	24.99		86.61	0.492	60.05
	87.64	0.112	31.76		83.75	0.46	49.18
	84.4	0.162	30.36		75.59	0.54	53.16
	86.57	0.13	33.59		90.29	0.492	56.59
	84.78	0.19	34.99		76.03	0.46	61.77
	88.02	0.132	27.94		79.08	0.52	48.05
	85.81	0.17	25.66		86.57	0.65	53.92
	78.37	0.12	32.82		85.15	0.49	64.32
	84.89	0.052	30.19		91.46	0.622	56.81
	88.99	0.072	25.5		79.63	0.49	60.44
	83.01	0.11	27.9		91.95	0.502	50.43
	80.47	0.072	29.93		90.21	0.51	59.8
	79.65	0.122	25.92		87.07	0.47	63.61
	77.31	0.142	30.95		81.11	0.6	55.49
	78.03	0.172	21.42		87.65	0.472	62.13
	76.88	0.05	30.43		75.6	0.472	47.1
	77.19	0.182	34.85		75.91	0.49	49.19
	79.7	0.192	25.73		75.54	0.542	58.16
	77.09	0.14	26.07		76.65	0.53	53.4
	89.53	0.19	28.65		80.59	0.57	61.87
	78.43	0.062	36.71		83.87	0.59	64.56
	82.07	0.1	21.63		78.05	0.542	63.47
	79.43	0.182	21.88		88.22	0.512	61.85
	80.35	0.072	37.95		88.14	0.522	50.22
	78.58	0.14	29.36		90.39	0.52	64.86
	84.23	0.19	33.92		88.4	0.512	60.41
	80.66	0.092	23.33		76.37	0.64	49.45
	79.16	0.172	33.17		76.98	0.58	58.4
	87.41	0.142	22.91		84.24	0.542	52.36
	88.43	0.102	29.79		89.87	0.56	56.02
	78.73	0.14	25.99		79.49	0.482	47.66
	79.29	0.092	20.42		78.29	0.5	54.86
	88.9	0.162	27.08		78.06	0.492	54.58
	77.49	0.152	31.74		87.59	0.482	61.8
	89.06	0.162	35.89		75.34	0.492	58.33
	78.32	0.15	34.96		77.27	0.622	56.08
	89.69	0.18	31.29		88.01	0.572	48.64
	84.76	0.09	21.13		84.72	0.65	58.22
	84.04	0.132	36.91		88.62	0.56	59.91
	87.59	0.062	22.74		78.96	0.57	64.94
	76.85	0.182	24.06		83.35	0.542	56.29
	88.59	0.14	25.49		78.34	0.51	63.37
	84.51	0.09	20.21		85.22	0.46	60
	80.42	0.182	30.06		87.4	0.522	62.92
	80.38	0.132	26.33		83.84	0.57	48.63
	80.6	0.06	24.85		89.97	0.542	56.31
	85.59	0.052	36.56		86.48	0.642	60.74
	78.68	0.1	31.6		75.11	0.612	54.77
	87.45	0.13	26.98		87.73	0.46	53.17
	79.58	0.13	24.38		77.02	0.57	52.58
	87.11	0.082	32.01		89.67	0.57	61.62
	88.34	0.192	28.82		84.34	0.542	58.51
	84.14	0.102	37.44		84.61	0.622	51.69
	89.88	0.052	37.52		80.5	0.492	53.71
	78.99	0.122	23.62		88.16	0.512	50.54
	79.08	0.08	24.95		78.07	0.61	51.51
	83.56	0.16	24.65		87.83	0.592	56.24
	79.34	0.08	22.99		83.77	0.592	50.8
	81.88	0.1	21.66		88.78	0.51	56.16
	82.32	0.17	23.39		76.61	0.622	63.76
	86.1	0.112	22.73		83.47	0.612	52.21
	82.77	0.172	22.91		88.62	0.562	49.88
	80.06	0.08	30.11		86.81	0.52	50.85
	87.28	0.1	33.13		89.85	0.56	58.22
	86.08	0.112	36.63		81.68	0.53	64.07
	84.23	0.07	26.61		81.05	0.542	53.49
	86.66	0.182	26.72		77.93	0.49	51.57
	84.29	0.06	34.91		81.21	0.532	50.63
	79.59	0.16	22.25		77.75	0.532	49.86
	80.48	0.182	20.51		76.99	0.49	62.15
	85.32	0.07	22.7		76.2	0.59	57.63
	78.3	0.14	35.96		78.37	0.642	59.05
	77.61	0.14	22.35		76.58	0.632	64.89
	84.01	0.102	33.95		88.83	0.47	63.93
	80.51	0.112	20.2		89.45	0.58	52.1
	79.7	0.07	33.86		82.71	0.542	60.31
	88.98	0.12	23.83		78.95	0.53	62.93
	88.79	0.062	20.81		82.67	0.582	52.28
	80.17	0.152	22.44		85.78	0.572	47.72
	77.37	0.132	28.91		90.55	0.512	50.98
	79.82	0.162	29.6		90.09	0.552	53.48
	79.82	0.07	30.88		81.7	0.51	49.22
	82.8	0.11	23.81		80.21	0.492	63.03
	86.96	0.192	30.4		89.59	0.632	52.2
	77.69	0.07	31.02		86.64	0.632	58.12
	85.7	0.082	33.35		87.87	0.522	49.31
	78.7	0.052	35.89		86.82	0.602	58.75
	82.51	0.182	36.12		85.83	0.472	49.94
	86.27	0.052	21.95		87.81	0.622	58.52
	82.29	0.082	23.82		82.48	0.512	63.59
	77.5	0.14	32.24		88.13	0.55	58.38
	85.5	0.16	28.89		76.55	0.462	57.78
	82.15	0.152	27.38		85.45	0.582	54.41
	82.66	0.12	23.21		91.55	0.63	53.15
	84.34	0.162	25.82		88.91	0.492	59.93
	81.29	0.102	21.23		78.02	0.592	64.65
	88.78	0.09	31.43		86.73	0.54	56.58
	81.84	0.082	34.11		77.62	0.46	56.7
	80.9	0.07	26.73		85.46	0.62	59.05
	83.33	0.18	22.53		78.84	0.552	47.02
	84.99	0.16	30.78		87.05	0.49	63.94
	85.06	0.18	23.08		78.59	0.55	57.58
	80.8	0.152	24.16		77.52	0.46	53.53
	88.68	0.16	31.16		80.38	0.55	58.23
	77.15	0.16	25.64		79.79	0.53	60.61
	86.82	0.11	30.74		91.48	0.5	51.69
	86.76	0.052	25.5		87.01	0.572	49.46
	83.4	0.122	30.91		75.15	0.58	55.54
	82.32	0.092	30.64		89.53	0.492	54.22
	86.47	0.112	36.25		87.35	0.5	61.87
	79.26	0.082	26.69		89.13	0.62	60.15
	80.12	0.142	25.73		88.04	0.602	47.6
	86.66	0.1	23.86		76.16	0.512	56.84
	87.23	0.12	24.22		86.4	0.64	58.12
	84.59	0.062	24.77		76.64	0.472	50
	80.54	0.132	32.37		76.73	0.542	51.1
	89.7	0.122	20.76		89.34	0.57	64.51
	82.14	0.14	21.75		82.27	0.542	63.89
	80.54	0.062	31.34		80.7	0.59	49.32
	82.24	0.16	21.76		91.33	0.502	52.01
	81.31	0.07	21.18		80.72	0.63	63.64
	78.38	0.15	34.05		83.78	0.64	55.88
	86.2	0.142	30.15		89.18	0.592	54.66
	80.29	0.052	36.66		80.3	0.592	55.23
	77.76	0.08	37.93		87.04	0.6	55.54
	86.04	0.122	28.66		91.08	0.61	55.13
	78.59	0.142	27.64		84.96	0.58	59.25
	88.94	0.16	24.5		90.65	0.542	62.77
	83.11	0.17	37.69		84.93	0.48	58.12
	85.95	0.11	27.3		87.94	0.592	62.29
	85.93	0.182	20.7		76.78	0.592	56.88
	82.8	0.1	21.76		75.45	0.462	53.76
	80.56	0.16	24.57		87.45	0.56	62.63
	79.16	0.082	25.06		77.33	0.46	64.69
	78.51	0.13	36.99		88.79	0.582	62.91
	81.08	0.132	27.4		90	0.542	48.11
	79.81	0.102	30.37		75.56	0.482	62.79
	78.81	0.14	29.13		82.56	0.622	48.09
	80.78	0.07	23.7		75.44	0.47	53.66
	84.39	0.17	22.5		83.77	0.64	53.99
	87.89	0.06	22.33		84.28	0.602	48.09
	84.2	0.15	28.47		80	0.51	62.26
	84.5	0.062	35.13		87.48	0.602	56.87
	80.91	0.182	29.27		88.52	0.57	53.93
	85.91	0.17	27.04		87.03	0.632	50.75
	80.68	0.112	29.75		83.89	0.54	52.04
	82.43	0.1	36.73		75.25	0.54	60.33
	83.54	0.07	37.83		88.23	0.632	60.67
	77.2	0.132	30		77.34	0.53	60.02
	85.38	0.06	29.53		83.23	0.51	58.03
	79.38	0.11	25.56		82.85	0.502	47.19
	84.14	0.07	24.49		85.31	0.56	64.6
	85.66	0.082	26.9		81.36	0.6	64.36
	82.84	0.132	34.92		85.05	0.612	56.72
	77.77	0.11	36.92		86.54	0.59	53.38
	79.55	0.082	37.84		82.51	0.47	55.21
	80.21	0.08	30.29		85.38	0.59	52.51
	87.46	0.06	27.16		85.32	0.63	55.08
	86.51	0.19	24.45		89.07	0.46	56.4
	88.45	0.1	28.69		85.87	0.502	55.67
	78.24	0.102	22.01		83.7	0.62	55.16
	80.91	0.112	36.73		89.37	0.582	63.51
	79.38	0.07	28.84		84.72	0.462	61.16
	87.28	0.12	35.32		78.4	0.62	47.59
	85.94	0.08	22.34		81.93	0.462	53.06
	78.03	0.06	26.71		81.28	0.48	52.74
	79.16	0.102	33.49		77.48	0.63	56.76
	84.68	0.13	20.65		82.2	0.55	51.4
	80.55	0.102	21.28		87.67	0.5	59.24
	78.76	0.062	25.55		81.83	0.61	59.91
	77.9	0.19	33		81.01	0.58	56.44
	78.6	0.122	37.83		79.19	0.55	52.12
	89.57	0.1	28.02		88.23	0.592	62.74
	87.74	0.072	29.38		76.57	0.6	50.51
	84.14	0.05	28.09		75.38	0.502	57.57
	84.82	0.17	37.38		90	0.542	62.47
	77.87	0.17	23.39		85.77	0.562	51.26
	79.19	0.1	27.48		86.5	0.502	48.11
	80.66	0.17	32.15		80.45	0.65	51.19
	82.51	0.112	35.94		78.6	0.54	62.36
	78.27	0.11	27.31		91.84	0.512	55.76
	83.53	0.072	24.33		79	0.58	62.58
	77.3	0.14	36.04		86.47	0.642	51.97
	81.2	0.132	26.24		90.24	0.59	48.48
	89.72	0.19	20.03		77.13	0.46	47.27
	79.43	0.12	30.08		88.59	0.5	53.92
	84.8	0.05	27.29		88.37	0.46	48.31
	76.86	0.112	33.47		90.97	0.512	53.07
	85.11	0.14	22.33		87.88	0.532	60.99
	81.37	0.1	27.18		77.87	0.49	49.02
	87.74	0.17	27.27		89.79	0.522	54.84
	87.96	0.16	23.76		79.58	0.62	52.55
	84.79	0.162	35.28		88	0.58	48.58
	86.28	0.06	21.08		82.76	0.562	51.35
	86.29	0.17	23.5		90.93	0.512	57.62
	84.01	0.07	23.51		88.63	0.65	48.97
	84.11	0.052	23.89		90.57	0.532	58.47
	88.48	0.14	34.42		80.35	0.512	59.24
	82.04	0.12	22.39		88.94	0.602	51.81
	87.2	0.08	36.39		83.71	0.64	54.95
	88.65	0.07	24.66		87.57	0.64	61.8
	85.9	0.112	22.86		79.02	0.62	63.75
	87.44	0.092	23.74		79.25	0.502	61.92
	83.01	0.182	37.84		82.69	0.59	53.95
	86.37	0.082	36.11		78.53	0.512	62.94
	81.48	0.162	33.73		76.63	0.522	56.32
	85.76	0.05	22.85		81.23	0.5	63.04
	85.07	0.17	34.21		91.87	0.61	61.55
	88.43	0.06	25.18		79.16	0.49	51.51
	77.28	0.15	31.46		91.06	0.532	59.72
	83.84	0.08	27.89		78.01	0.6	64.28
	80.84	0.13	32.64		85.59	0.642	47.4
	81.35	0.18	37.26		84.7	0.52	59.77
	88.82	0.16	34.14		79.21	0.63	50.09
	79.63	0.06	24.38		82.44	0.64	49.14
	78.86	0.182	21.71		91.96	0.47	55.88
	88.24	0.112	37.54		78.14	0.57	60.96
	79.96	0.072	24.67		84.69	0.47	52.89
	82.46	0.08	27.37		91.43	0.572	63.99
	82.17	0.162	36.89		91.68	0.632	53.21
	85.16	0.112	25.58		85.54	0.49	55.15
	79.99	0.052	23.89		90.69	0.57	48.02
	77.35	0.112	37.86		78.66	0.59	57.32
	80	0.19	31.88		81.53	0.49	59.39
	82.59	0.072	33.94		86.63	0.63	55.22
	79.36	0.162	29.89		88.66	0.542	56.88
	83.6	0.18	29.05		82.01	0.592	64.07
	81.7	0.12	23		80.68	0.62	49.5
	78.8	0.08	27.21		75.35	0.602	56.64
	83.64	0.13	22.38		84.47	0.522	52.54
	80.96	0.102	35.01		90.19	0.54	53.48
	86.72	0.072	37.88		83.93	0.48	47.09
	89.65	0.072	36.65		81.79	0.572	58.85
	77.96	0.17	24.3		86.35	0.61	49.14
	83.86	0.1	30.09		85.8	0.562	64.43
	85.78	0.172	21.99		79.09	0.53	50.53
	87.26	0.09	31.44		83.44	0.602	48.04
	87.64	0.06	27.21		86.7	0.61	62.47
	84.17	0.122	36.66		79.89	0.642	58.3
	87.41	0.052	22.8		84.68	0.49	61.64
	86.01	0.18	28.48		89.19	0.61	56.12
	78.05	0.142	23.3		78.36	0.64	58.16
	81.95	0.14	27.37		79.07	0.47	57.03
	88.45	0.122	33.95		78	0.52	56.36
	82.75	0.142	33.74		78.08	0.49	54.69
	85.42	0.07	28.66		75.13	0.6	58.45
	77.54	0.11	37.72		89.82	0.532	54.76
	86.22	0.16	25.37		85.13	0.472	53.48
	82.83	0.1	26.14		90.21	0.612	62.53
	85.28	0.14	25.93		76.96	0.58	49.71
	82.82	0.15	24.19		87.17	0.64	49.81
	85.21	0.062	22.29		87.25	0.46	56.79
	82.09	0.08	28.04		90.26	0.5	47.55
	86.87	0.15	35.72		85.96	0.562	57.35
	86.17	0.122	28.9		85.43	0.542	47.61
	81.75	0.15	25.14		77.68	0.6	49.08
	82.57	0.16	37.54		77.28	0.492	51.9
	81.94	0.132	32.76		76.39	0.592	47.05
	84.27	0.172	37.3		88.76	0.61	58.8
	82.6	0.192	28.97		82.73	0.472	55.76
	88.55	0.09	20.8		90.83	0.532	53.6
	83.79	0.052	26.5		88.62	0.462	61.24
	83.97	0.102	37.35		78.22	0.532	50.81
	89.95	0.11	21.42		86.48	0.58	48.55
	84.76	0.052	34.97		76.22	0.62	59.67
	80.59	0.1	37.62		83.06	0.602	61.37
	79.69	0.162	34.56		86.07	0.632	56.75
	77.61	0.122	32.73		81.78	0.64	51.37
	77.58	0.17	27.66		82.62	0.602	55.59
	79.62	0.172	37.33		88.6	0.61	56.23
	79.23	0.162	35.41		81.82	0.64	59.27
	85.46	0.052	20.47		91.09	0.47	54.56
	82.52	0.06	33.56		79.52	0.522	54.65
	88.98	0.15	28.68		90.17	0.502	58.17
	82.8	0.15	29.71		79.04	0.46	61.9
	80.98	0.072	29.91		88.39	0.49	59.56
	81.64	0.09	22.54		83.02	0.57	51.97
	82.11	0.11	35.84		90.53	0.61	56.32
	83.25	0.122	28.67		76.14	0.622	63.63
	87.13	0.11	21.7		83.58	0.632	63.61
	83.28	0.052	28.54		86.99	0.542	50.2
	88.71	0.19	31.59		81.09	0.57	53.53
	80.62	0.17	21.69		83.26	0.542	61.34
	86.72	0.09	28.67		86	0.642	57.59
	79.34	0.16	25.8		90.81	0.53	53.08
	80.92	0.152	34.36		76.05	0.502	51.45
	79.41	0.09	31.3		78.24	0.632	49.46
	76.83	0.152	35.75		82.34	0.55	62.29
	80.01	0.172	23.44		89.25	0.59	64.22
	82.51	0.06	24.99		85.12	0.55	47.84
	86.92	0.1	26.42		75.73	0.542	50.78
	84.57	0.19	34.06		85.5	0.612	50.35
	77.27	0.062	26.41		91.8	0.602	60.71
	87.92	0.14	35.03		80.86	0.59	55.17
	81.89	0.14	27.8		86.09	0.642	55.54
	79.05	0.08	27.53		78.81	0.6	52.98
	86.87	0.122	35.48		81.91	0.622	61.85
	83.44	0.06	23.17		80.07	0.5	58.46
	79.67	0.102	36.99		86.78	0.62	52.34
	80.3	0.13	21.14		85.08	0.61	52.73
	81.67	0.182	26.39		79.96	0.552	61.23
	87.07	0.16	23.18		82.63	0.502	49.03
	78.15	0.092	24.47		81.15	0.492	52.08
	87.82	0.09	26.57		90.53	0.462	59.65
	79.51	0.152	34.5		81.1	0.5	59.43
	78.19	0.13	33.37		86.59	0.46	59.67
	89.34	0.142	24.84		82.28	0.462	51.56
	84.71	0.072	26.49		84.05	0.5	48.26
	81.83	0.15	30.84		87.36	0.592	49.33
	79.32	0.06	25.42		83.81	0.48	48.53
	83.76	0.052	20.68		78.1	0.49	49.56
	87.35	0.19	23.97		80.81	0.592	62.97
	78.08	0.13	30.13		81.54	0.602	48.01
	82.82	0.16	32.07		90.32	0.62	59.78
	89.45	0.052	28.86		75.65	0.562	52.01
	78.65	0.142	22.29		85.22	0.56	51.75
	79.35	0.072	31.08		87.05	0.57	53.31
	85.24	0.08	20.57		76.93	0.57	51.19
	84.84	0.06	36.58		76.73	0.452	56.96
	77.06	0.172	25.63		76.67	0.57	63.49
	89.09	0.102	21.22		83.52	0.632	56.25
	88.23	0.11	34.98		84.48	0.592	57.14
	85.68	0.11	24.54		77.47	0.462	63.91
	79.36	0.1	30.09		86.83	0.632	58.08
	81.16	0.14	25.65		79.6	0.51	53.97
	77.92	0.12	30.66		84.28	0.472	55.14
	85.7	0.172	22.44		85.91	0.622	58.78
	86.45	0.132	31.63		90.34	0.512	61.88
	82.45	0.102	36.2		92.01	0.58	51.91
	77.81	0.092	37.8		91.8	0.52	63.04
	77.79	0.07	24.01		81.24	0.562	64.57
	83.22	0.1	31.21		77.2	0.5	48.71
	87.58	0.102	32.15		89.15	0.59	59.03
	89.82	0.062	23.81		84.32	0.65	61.13
	78.39	0.19	21.05		89.25	0.502	47.49
	78.88	0.11	21.63		82.98	0.562	59.07
	86.63	0.192	27.51		80.68	0.502	53.37
	86.5	0.152	33.7		82.37	0.572	62.71
	81.03	0.142	22.09		89.76	0.54	62.96
	81.05	0.082	30.81		88.82	0.61	55.13
	84.58	0.052	25.24		76.1	0.512	64.66
	89.56	0.152	22.89		78.62	0.472	54.78
	87.18	0.142	20.39		86.8	0.6	48.34
	89.15	0.122	36.48		84.65	0.59	64.98
	86.87	0.092	36.41		79.33	0.482	59.77
	88.67	0.15	32.59		83.49	0.46	52.05
	79.5	0.102	29.24		89.45	0.47	50.83
	84.55	0.122	37.31		86	0.48	59.78
	81.09	0.07	27.58		85.68	0.56	62.6
	87.07	0.162	27.06		91.96	0.482	58.62
	82.32	0.14	37.44		80.48	0.472	64.33
	87.03	0.08	33.51		78.66	0.602	53.7
	81.77	0.19	29.71		87.78	0.562	60.73
	77.69	0.112	34.56		81.88	0.462	48.74
	85.83	0.08	29.36		86.49	0.632	55.29
	81.36	0.1	37.46		89.06	0.502	56.44
	82.61	0.05	25.88		83.82	0.63	56.16
	77.25	0.092	21.52		79.79	0.49	47.06
	83.41	0.092	20.77		89.97	0.6	63.28
	87.81	0.11	34.21		77.25	0.59	64.24
	86.41	0.172	35.65		81.5	0.622	52.12
	78.23	0.19	31.63		79.36	0.49	47.42
	81.06	0.09	29.74		88.55	0.522	54.91
	88.5	0.192	29.41		75.6	0.642	57.64
	81.87	0.06	24.77		78.6	0.622	59.85
	77.26	0.102	32.98		84.17	0.502	60.57
	86.65	0.112	37.19		85.5	0.512	63.51
	77.36	0.14	29.76		88.55	0.632	47.39
	84.22	0.15	26.33		86.32	0.63	47.44
	86.23	0.072	36.71		77.8	0.56	52.74
	80.31	0.06	37.52		84.5	0.56	55.89
	89.31	0.152	28.67		86.78	0.46	64.2
	83.41	0.09	30.61		87.47	0.51	56.79
	80.73	0.17	26.91		78.21	0.6	55.36
	79.88	0.052	32.8		88	0.542	58.53
	82.62	0.05	24.66		91.69	0.512	60.16
	86.22	0.08	30.9		84.05	0.512	53.81
	86.52	0.132	30.14		90.33	0.51	52.56
	77	0.15	30.35		90.65	0.49	56.72
	82.25	0.05	37.74		78.42	0.46	51.48
	80.4	0.09	29.15		90.97	0.622	49.16
	78.17	0.132	28.64		75.17	0.65	48.12
	78.6	0.1	34.38		89.17	0.6	53.86
	87.38	0.09	36.59		87.77	0.65	56.85
	80.11	0.132	20.88		79.71	0.5	50.23
	89.27	0.162	31.91		84.51	0.612	53.76
	79.54	0.11	37.74		81.34	0.512	49.28
	79.52	0.122	30.34		80.12	0.592	50.06
	79.6	0.09	25.8		78.09	0.57	47.03
	84.87	0.152	30.51		90.76	0.592	53.69
	85.88	0.182	32.03		84.19	0.59	50.2
	78.19	0.082	28.6		80.64	0.602	52.03
	85.55	0.07	25.18		90.24	0.572	62.77
	83.74	0.13	37.5		86.89	0.582	64.35
	77.95	0.122	31.86		86.64	0.512	60.27
	88.81	0.092	22.91		91.74	0.472	62.02
	80.22	0.172	33.91		86.05	0.582	52.47
	83.44	0.052	24.02		76.48	0.47	56.71
	82.36	0.162	21.06		83.36	0.64	56.33
	83.7	0.16	23.25		77.66	0.54	51.15
[truncated: 6,855 more rows]

## Sheet: AlexNet
	SFEARA(AlexNet)				AlexNet
	acc	sirt	ec		acc	sirt	ec
	84.34	0.23	38.17		86.97	0.33	36.23
	84.02	0.24	27.12		87.26	0.29	38.41
	83.63	0.16	31.77		82.3	0.45	54.88
	79.9	0.25	39.17		85.97	0.37	54.89
	91.77	0.29	31.25		87.26	0.33	45.58
	85.22	0.28	40.96		76.64	0.31	37.37
	92.32	0.14	37.67		87.85	0.33	54.46
	78.87	0.2	39.44		80.67	0.37	37.03
	92.72	0.27	29.79		83.41	0.35	49.18
	79.41	0.24	37.15		81.27	0.3	45.98
	85.53	0.29	30.17		80.89	0.28	48.76
	93.59	0.18	37.25		82.49	0.36	53.41
	81.62	0.27	43.37		82.82	0.32	47.07
	90.36	0.18	37.71		75.75	0.44	40.99
	79.98	0.13	27.53		87.19	0.37	41.54
	82.73	0.27	42.7		81.79	0.34	35.77
	82.4	0.14	32.86		82.66	0.34	36.5
	87.47	0.17	41.28		75.33	0.38	50.58
	90.19	0.29	35.45		76.6	0.36	52.4
	85.32	0.19	44.67		80.95	0.35	41.59
	82.38	0.14	36.25		86.32	0.4	37.23
	89.03	0.22	29.73		84.38	0.41	51.26
	85.63	0.29	42.35		86.6	0.35	41.71
	78.78	0.2	33.61		79.21	0.41	49.93
	84.04	0.2	36.49		79.57	0.4	40.65
	83.7	0.17	44.78		78.89	0.34	36.03
	90.63	0.2	28.4		75.63	0.3	41.16
	77.64	0.24	34.43		83.66	0.44	41.16
	83.05	0.26	39.97		80.35	0.29	44.62
	87.81	0.18	32.8		79.83	0.4	37.46
	78.19	0.17	39.45		79.75	0.36	53.4
	92.03	0.23	40.15		80.67	0.31	40.05
	79.37	0.22	30.74		76.24	0.29	51.51
	91.83	0.13	27.2		85.66	0.29	45.25
	84.75	0.25	36.22		84.75	0.3	45.54
	88.78	0.18	30.88		78.22	0.42	46.15
	88.56	0.3	36.46		75.88	0.42	53.94
	84.98	0.24	28.68		75.81	0.3	36.82
	87.46	0.27	34.05		79.24	0.41	41.14
	89.4	0.28	41.56		82.49	0.34	49.96
	80.2	0.14	40		75.86	0.38	37.55
	93.03	0.26	42.92		75.83	0.45	42.28
	91.63	0.16	42.26		83.96	0.39	39.6
	87.86	0.29	31.39		78.82	0.34	46.05
	89.09	0.18	27.69		79.68	0.3	35.38
	90.22	0.3	34.41		78.06	0.41	46.5
	93.35	0.24	34.3		78.03	0.44	38.88
	92.66	0.26	44.48		86.94	0.32	41.86
	91.53	0.22	42.16		85.86	0.28	46.43
	90.92	0.24	41.08		85.52	0.33	35.21
	83.05	0.2	37.83		88.04	0.31	39.36
	79.25	0.28	38.44		86.53	0.32	47.74
	81.58	0.26	39.09		78.11	0.28	44.37
	78.94	0.29	32.39		76.71	0.39	40.12
	83.58	0.26	44.36		86.6	0.42	39.05
	85.2	0.14	43.8		77.43	0.28	51.91
	88.04	0.22	27.53		78.99	0.29	39.51
	93.63	0.29	31.38		82.73	0.3	53.15
	89.74	0.19	37.57		81.12	0.42	50.55
	79.68	0.25	30.19		87.35	0.38	40.63
	88.88	0.14	36.81		82.12	0.36	54.18
	82.02	0.15	27.27		77.9	0.28	37.93
	83.17	0.17	33.77		79.17	0.41	43.58
	85.76	0.14	31.09		87.3	0.45	41.2
	82.59	0.19	27.24		88.08	0.37	39.15
	78.8	0.15	27.54		85.89	0.34	44.51
	89.95	0.19	38.38		79.82	0.3	53.58
	93.4	0.14	35.2		84.08	0.36	50.05
	92.96	0.15	28.44		83.08	0.32	50.89
	91.33	0.28	29.21		77.22	0.39	41.91
	78.23	0.26	37.19		75.31	0.29	44.83
	81.38	0.15	36.04		81.94	0.34	42.69
	83.19	0.21	28.33		76.8	0.34	52.24
	92.14	0.27	35.74		85.13	0.38	45.63
	90.58	0.29	35.5		85.29	0.31	53.25
	78.45	0.18	35.41		77.75	0.4	50.63
	78.24	0.13	33.25		78.27	0.31	45.74
	79.75	0.27	44.03		86.11	0.32	43.69
	80.63	0.14	28.18		80.11	0.3	47.1
	80.63	0.28	32.2		79.84	0.45	40.83
	82.79	0.3	38.81		78.98	0.37	36.18
	92.46	0.14	35.79		85.59	0.41	42.59
	92.52	0.17	30.88		82.91	0.31	49.01
	90.45	0.13	36.57		86.3	0.44	41.55
	90.8	0.23	37.68		75.74	0.36	35.26
	87.2	0.25	31.31		76.6	0.41	45.73
	87.89	0.17	28.87		84.66	0.34	37.85
	87.16	0.22	35.01		78.67	0.42	49.6
	88.14	0.24	41.7		87.27	0.32	48.41
	83.56	0.26	28.45		77.53	0.34	44.12
	84.05	0.21	33.54		86.8	0.37	44.3
	84.85	0.22	37.88		87.8	0.32	37.37
	89.72	0.28	41.24		78.79	0.39	53.2
	83.28	0.26	42.43		80.51	0.35	39
	81.26	0.18	29.64		81.02	0.32	40.39
	93.78	0.27	29.4		78.65	0.31	43.38
	89.45	0.17	27.29		87.74	0.44	41.96
	90.35	0.15	33.58		76.86	0.39	47.33
	77.42	0.19	27.4		80.88	0.44	48.53
	92.01	0.13	29.67		85.89	0.36	46.28
	84.14	0.2	31.73		80.91	0.39	36.25
	81.14	0.23	44.99		84.84	0.39	52.91
	90.95	0.19	30.15		79.9	0.41	53.13
	91.75	0.14	42.82		88.11	0.39	52.94
	79.82	0.23	28.48		85.91	0.29	44.18
	80.14	0.25	39.8		78.1	0.4	47.89
	91.16	0.22	27.32		86.84	0.44	36.97
	89.52	0.18	30.8		76.98	0.43	53.4
	93.81	0.26	43.51		77.12	0.45	44.52
	83.24	0.3	40.48		82.68	0.28	47.03
	78.67	0.24	42.33		83.96	0.35	44.4
	91.44	0.22	40.6		85.4	0.29	41.7
	88.28	0.29	40.79		78.76	0.39	37.32
	86.08	0.19	43.69		79.04	0.34	45.38
	88.15	0.14	32.87		82.51	0.44	46.92
	83.48	0.27	29.15		76.55	0.29	42.83
	93.54	0.27	38.44		86	0.45	48.07
	90.63	0.27	27.74		79.25	0.37	50.09
	90.81	0.19	44.47		80.74	0.35	51.31
	90.43	0.17	38.13		84.75	0.32	47.55
	81.36	0.2	38.76		78.14	0.45	37.39
	88.29	0.29	31.56		86.16	0.28	53.45
	88.67	0.21	34.11		82.52	0.4	46.28
	87.23	0.16	33.28		80.31	0.34	37.04
	78.94	0.21	32.72		80.94	0.45	51.31
	84.72	0.16	32.79		75.38	0.32	51.19
	82.3	0.18	33.84		83.96	0.3	48.52
	82.58	0.3	33.87		79.14	0.28	50.11
	88.21	0.21	32.2		85.69	0.41	48.27
	93.36	0.18	27.45		75.25	0.32	51.95
	79.89	0.18	27.82		80.77	0.34	49.75
	93.33	0.26	32.33		85.72	0.4	43.24
	85.65	0.18	33.76		79.24	0.42	52.48
	88.42	0.28	37.75		76.47	0.33	36.88
	85.75	0.17	38.24		80.21	0.44	42.93
	77.46	0.21	43.08		82.07	0.38	35.86
	91.77	0.27	32.62		78.53	0.37	53.07
	79.14	0.2	28.44		85.27	0.39	53.86
	86.72	0.27	41.06		88.01	0.32	49.97
	89.92	0.16	35.23		84.88	0.41	50.13
	90.72	0.25	43.73		85.98	0.4	35.38
	90.91	0.17	28.79		76.97	0.32	39.41
	81.76	0.18	31.2		78.24	0.4	35.27
	79.81	0.3	28.84		76.7	0.39	39.35
	85.82	0.3	44.91		86.43	0.44	52.31
	80.6	0.25	32.44		76.9	0.44	43.3
	89.05	0.2	42.6		85.32	0.36	49.82
	88.42	0.17	37.52		87.62	0.3	47.19
	81.37	0.26	31.19		86.83	0.28	49.18
	78.53	0.24	38.35		82.04	0.29	35.51
	89.6	0.21	29.13		80.29	0.43	51.96
	83.47	0.25	34.9		83.92	0.44	35.92
	82.19	0.14	37.77		85.3	0.32	39.92
	80.61	0.25	32.67		82.05	0.32	35.35
	80.02	0.27	44.79		81.04	0.41	37.93
	91.96	0.29	37.28		78.95	0.41	50.09
	92.24	0.14	39.47		82.89	0.37	54.97
	78.32	0.17	28.85		82.14	0.31	43
	88.86	0.25	37.45		86.55	0.41	48
	86.72	0.18	43.8		87.19	0.44	45.01
	91.29	0.15	42.57		78.01	0.39	42.22
	83.34	0.22	43.82		81.16	0.39	42.26
	91.06	0.16	43.17		76.4	0.41	54.96
	88.29	0.24	28.57		77.27	0.34	39.41
	81	0.29	43.55		86.54	0.32	44.16
	83.78	0.15	27.01		78.92	0.38	53.09
	91.58	0.19	28.89		87.18	0.31	37.6
	78.82	0.28	43.7		78.78	0.37	49.49
	82.46	0.24	28.82		81.07	0.43	48.31
	80.27	0.26	38.44		79.31	0.4	51.47
	88.99	0.18	31.02		87.97	0.33	44.28
	83.19	0.15	31.05		86.91	0.36	45.81
	93.42	0.2	31.67		76.06	0.31	51.39
	78.15	0.22	30.35		77.09	0.4	46.85
	88.77	0.21	36.66		76.66	0.39	40.94
	81.19	0.18	29.08		81.34	0.44	45.6
	81.14	0.29	35.21		82.47	0.39	51.8
	77.98	0.27	39.62		80.3	0.41	35.03
	90.68	0.3	30.24		85.33	0.29	38.18
	90.45	0.29	29.33		75.56	0.37	36.94
	92.74	0.28	35.63		86.86	0.32	49.67
	79.73	0.21	27.31		87.67	0.33	41.76
	78.25	0.29	34.68		82.88	0.4	39.95
	88.21	0.14	39.78		76.62	0.41	44.48
	78.51	0.22	32.29		75.51	0.39	36.58
	79.6	0.18	28.34		75.33	0.39	45.98
	87.26	0.23	29.85		83.23	0.33	44.09
	87.79	0.13	32.02		78.24	0.35	46.44
	90.16	0.27	35.19		75.62	0.37	38.92
	82.45	0.18	28.61		80.09	0.42	53.42
	83.41	0.22	30.88		81.23	0.33	36.41
	80.51	0.18	30.86		85.82	0.31	42.37
	91.57	0.18	40.09		81.51	0.32	47.87
	85.89	0.16	33.8		77.09	0.45	44.38
	81.09	0.26	42.89		78.5	0.28	35.64
	83.09	0.2	40.11		86.53	0.33	54.27
	83.35	0.29	27.43		78.81	0.38	46.32
	93.94	0.27	28.63		88.06	0.37	38.08
	81.5	0.16	36.21		81.24	0.28	49.85
	77.88	0.27	31.97		86.22	0.33	40.13
	84.27	0.2	28.31		85.86	0.39	45.48
	78.81	0.14	32.61		79.57	0.44	39.52
	81.28	0.24	42.28		82.97	0.35	52.54
	91.53	0.2	35.53		82.46	0.28	38.73
	84.54	0.24	33.92		85.49	0.31	37.21
	77.05	0.21	30.3		83	0.39	52.74
	93.71	0.29	39.28		77.79	0.36	44.81
	84.02	0.25	43.07		84.16	0.29	45.97
	83.1	0.3	40.79		75.57	0.41	47.67
	93.32	0.27	29.91		76.34	0.28	45.81
	88.43	0.3	43.78		76.4	0.43	39.52
	93.11	0.19	28.16		85.26	0.33	53.2
	86.8	0.18	34.05		84.93	0.44	49.62
	87.43	0.25	35.2		77.69	0.42	40.88
	93.91	0.24	40.79		80.65	0.29	48.32
	79.23	0.15	44.75		78.52	0.33	44.07
	93.44	0.27	42.63		77.93	0.31	44.37
	78.54	0.14	43.3		81.98	0.28	50.16
	82.58	0.17	30.68		81.34	0.36	44.79
	81.55	0.27	28.51		76.75	0.32	39.28
	88.04	0.17	43.31		76.02	0.37	49.91
	86.81	0.21	27.79		83.15	0.36	49.82
	88.09	0.3	27.4		83.23	0.29	47.16
	86.16	0.15	32.36		87.79	0.42	51.77
	79.37	0.2	31.27		79.06	0.33	40.37
	78.9	0.24	36.66		84.31	0.45	52.12
	82.86	0.19	42.25		86.67	0.4	47.89
	77.01	0.21	34.77		83.1	0.39	52.45
	82.79	0.24	40.32		75.01	0.34	54.79
	83.43	0.28	37.39		87.82	0.38	40.35
	87.78	0.2	33.44		76.82	0.35	51.78
	77.94	0.18	35.52		77.12	0.37	45.17
	79.8	0.16	36.97		84.52	0.43	53.86
	86.5	0.25	44.18		82.3	0.29	38.96
	84.82	0.16	27.19		77.91	0.36	44.29
	78.42	0.25	36.33		80.12	0.38	42.26
	81.58	0.15	42.58		77.77	0.44	52.52
	86.15	0.3	42.54		81.28	0.37	35.77
	84.99	0.14	35.98		81.24	0.32	53.46
	77.75	0.24	32.28		76.8	0.4	44.31
	84.11	0.25	43.5		80.75	0.32	43.8
	79.4	0.27	43.99		75.7	0.43	44.05
	78.44	0.25	28.09		81.46	0.43	39.65
	77.69	0.2	44.16		80.63	0.37	54.57
	91.45	0.15	44.72		75.06	0.36	36.14
	84.51	0.27	40.23		83.13	0.42	38.98
	86.01	0.22	35.49		83.03	0.28	35.57
	78.85	0.21	34.51		75.33	0.32	47.96
	80.08	0.2	27.12		80.66	0.31	38.78
	77.92	0.22	38.1		78.93	0.45	37.35
	91.38	0.24	27.2		81.09	0.42	37.77
	86.47	0.17	32.34		85.69	0.37	53.58
	86.08	0.24	27.45		80.68	0.29	49.86
	93.19	0.22	39.69		82.95	0.43	42.5
	85.67	0.14	28.84		87.18	0.37	44.49
	92.66	0.19	34.05		80.26	0.32	46.2
	87.15	0.19	30.68		76.4	0.38	43.68
	92.31	0.21	36.85		76.4	0.43	54.96
	78.68	0.3	43.2		80.17	0.33	46.6
	86.3	0.14	35.86		81.83	0.42	36.83
	81.3	0.2	34.42		77.98	0.43	49.07
	87.92	0.22	37.17		83.57	0.38	47.51
	78.2	0.27	38.02		80.64	0.3	49.3
	91.73	0.22	36.73		88.17	0.41	54.85
	77.68	0.21	34.76		77.87	0.34	51.49
	83.78	0.17	31.1		88	0.38	51.28
	93.85	0.21	37.73		77.16	0.39	49.11
	91.7	0.15	30.32		82.57	0.36	42.98
	81.42	0.16	28.11		86.66	0.3	43.64
	77.58	0.29	29.12		77.21	0.45	52.45
	88.28	0.2	43.19		81.17	0.44	42.97
	87.71	0.15	27.65		78.98	0.39	43.22
	83.97	0.25	36.95		75.93	0.31	51.26
	84.92	0.24	36.35		83.62	0.36	51.19
	85.45	0.15	29.82		75.29	0.33	40.12
	81.88	0.24	29.15		77.48	0.32	46.34
	87.43	0.23	35.61		78.18	0.38	40.03
	87.31	0.24	31.02		83.46	0.42	52.54
	85.94	0.19	33.41		84.76	0.3	38.34
	93.62	0.2	36.38		82.58	0.34	53.48
	86.07	0.26	27.36		77.79	0.37	43.07
	77.22	0.23	33.53		76.76	0.41	47.46
	80.77	0.13	33.52		75.55	0.32	37.69
	78.41	0.19	27.21		81.55	0.41	43.77
	86.7	0.15	41		79.41	0.34	36.52
	86.36	0.17	27.57		88.08	0.39	53.49
	90.23	0.21	33.11		81.89	0.44	47.53
	89.95	0.24	41.45		85.79	0.37	42.93
	82.77	0.16	34.19		87.11	0.4	48.22
	87.57	0.16	44.23		86.77	0.31	42.96
	85.3	0.26	29.67		86.21	0.35	51.74
	82.96	0.21	33.22		80.18	0.42	46.82
	93.91	0.2	35.04		75.77	0.37	45.85
	80.47	0.29	38.03		83.63	0.44	42.86
	83.94	0.16	36.74		84.63	0.42	51.96
	77.98	0.15	31.5		79.93	0.44	52.52
	85.4	0.14	31.91		86.11	0.44	47.46
	85.69	0.26	39.8		82.99	0.33	44.71
	83.91	0.28	31.7		85.2	0.3	35.87
	86.35	0.27	28.01		86.76	0.37	43.45
	90.87	0.26	33.4		75.13	0.36	41.43
	77.42	0.2	27.14		79.32	0.39	36.98
	86.39	0.28	37.79		86.93	0.39	37.46
	80.64	0.18	40.6		83.99	0.43	50.73
	90.2	0.14	36.71		85.18	0.29	35.17
	92.64	0.25	43.55		88	0.31	52.66
	77.01	0.16	35.88		80.21	0.35	46.55
	90.84	0.15	29.94		86.3	0.44	36.22
	78.6	0.15	36.33		87.59	0.4	52.85
	81.07	0.14	34.68		77.54	0.34	35.79
	81.99	0.2	35.62		75.15	0.35	42.55
	78.33	0.21	27.81		82.45	0.32	41.69
	91.79	0.2	29.55		82.03	0.33	49.81
	81.96	0.21	34.34		75.54	0.45	46.84
	83.94	0.2	41.19		77.08	0.31	50.48
	83.63	0.27	28.66		82.76	0.35	47.55
	86.54	0.14	34.34		76.18	0.33	50.74
	87.79	0.19	28.08		80.81	0.39	45.3
	87.75	0.23	41.21		78.05	0.33	51.93
	81.58	0.17	44.87		83.02	0.39	45.82
	90.14	0.3	28.34		84.16	0.44	47.59
	81.85	0.28	32.15		75.48	0.43	39.87
	81.16	0.19	30.46		81.45	0.32	50.75
	92.42	0.24	31.18		83.67	0.37	40.24
	81.15	0.13	37.96		79.54	0.37	51.84
	79.08	0.3	31.59		75.42	0.43	49.09
	86.95	0.13	44.15		85.31	0.37	49.25
	79.22	0.18	44.01		76.68	0.45	54.83
	90.72	0.19	42.83		77	0.36	44.55
	88.99	0.19	29.93		82.24	0.45	52.07
	86.89	0.18	29.83		76.25	0.32	40.01
	87.09	0.23	35.64		85.48	0.35	41.53
	86.44	0.24	28.08		86.19	0.31	40.04
	84.32	0.17	28.04		80.4	0.39	43.25
	79.18	0.15	28.32		87.34	0.4	46.91
	89.83	0.14	42.29		82.57	0.38	39.05
	84.35	0.27	41.33		86.95	0.35	50.84
	79.11	0.22	40.08		75.36	0.4	51.38
	83.83	0.17	29.03		86.76	0.29	35.35
	92.46	0.18	34.04		87.42	0.41	44.73
	81.14	0.27	30.36		82.96	0.39	39.68
	84.99	0.13	35.05		84.48	0.29	52.69
	92.76	0.27	34.13		83.46	0.34	48.28
	79.61	0.14	36.17		84.85	0.42	53.38
	85.47	0.29	38.86		77.91	0.36	42.12
	88.4	0.13	38.35		84.98	0.28	43.77
	87.55	0.21	44.22		77	0.32	52.36
	79.93	0.17	42.43		85.91	0.36	36.07
	93.07	0.19	44.05		85.18	0.39	39.65
	91.59	0.27	42.33		75.7	0.42	39.11
	93.18	0.22	37.18		84.49	0.41	35.78
	84.65	0.23	36.77		83.15	0.36	40.2
	89.42	0.22	43.3		85.76	0.31	53.65
	89.35	0.25	35.91		79.96	0.35	46.29
	79.12	0.13	27.2		80.35	0.34	52.18
	82.76	0.14	37.83		87.44	0.41	44.17
	93.62	0.23	29.7		86	0.39	38.15
	88.85	0.15	30.36		78.26	0.42	43.27
	89.41	0.15	27.88		86.5	0.39	48.92
	87.95	0.17	43.97		77.13	0.39	51.91
	92.27	0.14	36.83		86.01	0.3	52.52
	87.07	0.27	33.2		76.81	0.29	39.6
	81.41	0.24	43.56		87.81	0.42	44.28
	85.3	0.25	32.66		86.16	0.35	43.41
	86.68	0.21	30.98		77.3	0.39	51.15
	78.31	0.2	35.71		77.07	0.45	38.28
	77.31	0.14	38.22		86.23	0.45	48.79
	84.32	0.27	30.72		86.64	0.29	35.72
	85.11	0.25	30.65		78.17	0.43	35.54
	83.81	0.16	37.47		79.91	0.37	53.53
	82.84	0.26	33.61		87.62	0.41	39.67
	85.18	0.18	44.41		80.38	0.31	48.43
	91.41	0.2	44.49		81.41	0.39	41.85
	88.89	0.25	35.95		86	0.38	50.44
	89.8	0.29	27.15		85.89	0.34	40.32
	91.37	0.18	41.89		76.53	0.31	52.32
	86.86	0.25	39.45		76.93	0.32	38.21
	90.46	0.25	37.06		85.7	0.44	43.02
	82.6	0.3	44.06		86.83	0.36	54.43
	92.25	0.21	34.47		81	0.4	51.65
	84.79	0.2	37.81		77.09	0.4	43.01
	78.47	0.19	36.89		82.71	0.41	41.72
	82.12	0.22	44.8		81.09	0.35	52.41
	78.33	0.16	41.97		76.73	0.28	40.24
	82.98	0.15	34.05		80.09	0.37	46.1
	83.36	0.14	38.69		77.68	0.36	41.58
	87.32	0.17	36.34		75.35	0.31	51.23
	79.98	0.24	35.91		79.63	0.34	41.01
	85.64	0.25	38.33		86.36	0.35	35.54
	85.93	0.14	41.01		84.76	0.33	50.03
	88.62	0.25	44.06		75.19	0.32	35.03
	87.9	0.19	28.3		77.4	0.34	39.44
	86.95	0.2	42.17		86.57	0.32	45.81
	82.24	0.19	34.95		84.04	0.34	39.35
	85.69	0.3	32.13		75.76	0.36	45.94
	77.64	0.13	43.11		77.23	0.43	50.1
	90.97	0.27	27.92		80.32	0.4	39.59
	92.51	0.14	35.56		77.9	0.4	41.65
	86.97	0.13	44.67		87.71	0.32	38.23
	90.34	0.15	32.96		82.36	0.42	40.87
	93.92	0.18	29.98		76.24	0.29	51.12
	81.22	0.2	27.1		80.77	0.34	40.5
	84.41	0.25	34.24		87.84	0.33	53.52
	90	0.24	31.41		79.86	0.4	49.13
	93.02	0.15	33.3		76.83	0.45	49.28
	77.89	0.19	36.44		82.24	0.44	49.29
	87.66	0.3	37.33		85.11	0.32	45.23
	80.91	0.13	30.32		86.81	0.37	40.81
	92.56	0.29	32.96		85.88	0.45	41.76
	86.34	0.24	33.97		76.4	0.34	46.95
	78.53	0.16	41.65		78.96	0.44	50.04
	92.73	0.28	30.57		86.3	0.43	54.76
	78.31	0.28	42.59		81.57	0.31	36.73
	84.41	0.18	30.66		79.68	0.41	46.95
	92.53	0.26	31.08		76.78	0.33	51.15
	81.53	0.23	32.83		76.94	0.43	50.47
	87.25	0.13	30.68		81.92	0.37	54.24
	87.91	0.23	43.39		79.31	0.3	37.84
	91.45	0.24	32.39		86.06	0.31	46.48
	93.83	0.18	30.02		86.13	0.44	52.77
	93.69	0.14	27.49		85.34	0.31	48.82
	81.21	0.21	44.66		86.98	0.4	36.19
	80.37	0.19	31.26		77.42	0.36	47.68
	81.74	0.25	29.75		83.44	0.43	37.36
	83.32	0.24	37.53		85.64	0.41	37.76
	80.56	0.23	27.25		85.67	0.3	41.95
	77.89	0.26	37.76		87.79	0.44	38.6
	90.09	0.22	40.79		75.91	0.43	39.61
	86.8	0.16	29.58		77.6	0.4	52.69
	81.13	0.2	30.95		75.26	0.45	52.66
	80.01	0.23	31.14		84.33	0.45	45.05
	78.84	0.3	29.35		78.15	0.41	49.26
	90.49	0.16	31.04		76.41	0.41	48.46
	85.26	0.27	39.4		80.81	0.32	52.5
	88.93	0.13	43.51		85.38	0.35	46.02
	87.2	0.17	37.2		79.47	0.34	52.1
	91.81	0.18	35.02		77.92	0.4	46.29
	89.38	0.28	40.58		82.38	0.35	46.21
	81.53	0.3	42.75		75.9	0.39	46.78
	83.42	0.19	27.46		84.9	0.44	51.08
	92.04	0.24	42.42		82.87	0.45	42.03
	93.12	0.19	33.07		82.52	0.36	39.13
	87.78	0.19	38.76		77.1	0.35	45.45
	78.6	0.19	35.59		76.73	0.29	43.08
	83.98	0.21	41.26		76.66	0.32	40.56
	84.45	0.18	27.53		80.96	0.42	51.9
	77.31	0.13	39.66		81.94	0.37	49.69
	85	0.13	38.37		78.75	0.42	43.48
	92.67	0.2	44.04		76.01	0.34	41.14
	85.31	0.24	40.51		75.55	0.35	46.38
	80.16	0.19	27.9		77.37	0.33	41.17
	86.48	0.24	28.51		79.39	0.34	51.18
	87.38	0.25	34.81		79.5	0.35	41.97
	91.24	0.15	32.34		86.97	0.41	53.97
	87.34	0.29	43.99		85.5	0.39	37.89
	91.68	0.18	41.37		75.84	0.29	37.01
	80.44	0.18	30.43		77.29	0.34	37.04
	90.73	0.3	44.48		83.04	0.37	44.94
	79.88	0.17	35.32		75.07	0.32	35.03
	93.77	0.21	37		79.23	0.42	48.78
	85.78	0.16	37.76		84.61	0.29	46.32
	79.48	0.14	42.7		76.21	0.32	41.21
	83.09	0.21	27.83		81.39	0.4	37.66
	91.3	0.17	31.03		84.29	0.33	37.98
	87.23	0.22	31.28		79.86	0.44	53.1
	78.19	0.14	37.1		79.85	0.42	39.89
	81.8	0.18	38.24		77.63	0.29	37.96
	91.51	0.2	30.98		81.32	0.37	46.48
	80.7	0.2	27.05		85.41	0.29	47.87
	91.51	0.19	29.61		80.14	0.42	44.64
	82.3	0.3	40.94		75.85	0.45	46.62
	88.01	0.23	41.82		75.04	0.43	40.84
	93.31	0.25	32		81.9	0.4	35.6
	93.04	0.16	38.17		80.6	0.42	37.92
	84.41	0.21	33.41		80.34	0.33	51.48
	77.9	0.23	44.98		86.44	0.34	37.55
	84.14	0.29	32.79		88.03	0.36	35.45
	92.73	0.19	39.55		76.38	0.4	38.24
	86.52	0.27	40.8		79.73	0.37	50.67
	88.14	0.17	30.46		80.67	0.31	35.15
	81.32	0.21	37.35		79.6	0.3	42.99
	83.34	0.22	28.52		79.2	0.33	35.37
	81.83	0.17	28.67		84.98	0.32	45.52
	90.15	0.25	35.85		78.89	0.36	47.08
	92.36	0.22	41.45		82.73	0.4	45.93
	90.75	0.29	33.5		87.32	0.44	45.34
	92.93	0.18	43.53		77.07	0.44	36.63
	92.1	0.13	35.29		82.48	0.32	41.23
	77.63	0.3	32.75		77.11	0.37	35.12
	90.15	0.18	42.3		87.8	0.36	37.04
	77.42	0.16	43.62		85.94	0.33	51.32
	77.84	0.15	44.12		83.95	0.33	39.11
	92.05	0.17	42.46		87.51	0.43	51.91
	80.66	0.18	28.51		87.17	0.39	40.45
	91.33	0.17	27.74		84.07	0.39	38.17
	79.63	0.24	27.92		80.93	0.36	41.68
	89.31	0.17	39.13		85.19	0.39	36.33
	91.74	0.22	38.23		75.95	0.33	50.33
	77.18	0.2	40.42		76.29	0.44	50.66
	80.31	0.3	27.21		78.23	0.37	47.24
	84.66	0.16	29.37		75.41	0.37	39.5
	77.67	0.15	31.84		82.97	0.44	48.92
	79.29	0.16	39.99		78.69	0.35	48.74
	83.49	0.28	36.06		84.41	0.31	47.13
	79.66	0.16	29.64		83.17	0.37	39.27
	86.95	0.29	31.02		81.83	0.44	39.71
	88.8	0.16	30.85		78.64	0.35	53.24
	78.88	0.29	41.46		75.94	0.38	40.36
	93.5	0.2	43.24		85.33	0.28	52.42
	88.25	0.28	28.62		75.23	0.32	50.6
	90.34	0.22	44.41		88.04	0.36	45.96
	93.08	0.18	28.03		83.92	0.33	48.84
	78.57	0.13	32.03		80.07	0.4	51.09
	88.42	0.21	33.81		84.58	0.38	40.6
	83.61	0.14	39.44		87.71	0.39	41.44
	80.21	0.16	43.99		78.98	0.32	46.95
	81.42	0.23	33.05		78.83	0.33	41.03
	87.23	0.28	27.5		83.09	0.43	46.3
	79.07	0.25	29.5		77.59	0.29	46.2
	77.95	0.16	41.58		75.36	0.4	46.95
	93.91	0.27	43.39		80.05	0.41	41.38
	88.4	0.26	31.58		78.71	0.44	42.78
	84.53	0.25	31.25		81.47	0.43	52.15
	80.06	0.17	41.54		84.68	0.41	41.59
	80.03	0.23	39.17		85.26	0.42	47.38
	78.13	0.17	43.89		75.64	0.29	43.1
	84.39	0.2	27.19		86.59	0.36	54.97
	90.82	0.27	34.57		78.9	0.38	39.97
	88.19	0.21	42.95		83.27	0.3	36.33
	93.51	0.15	29.93		84.72	0.4	38.22
	93.61	0.15	34.06		86.82	0.29	44.62
	85.36	0.21	38.72		83.44	0.42	37.15
	91.02	0.19	34.38		78.57	0.35	47.37
	84.42	0.25	27.83		85.54	0.41	36.07
	77.41	0.25	36.75		77.68	0.31	43.75
	86.75	0.23	42.65		83.12	0.41	35.25
	88.57	0.23	31.89		76.51	0.32	40.59
	87.01	0.22	39.71		85.66	0.42	46.51
	93.1	0.26	41.49		80.41	0.44	43.16
	84.19	0.29	27.04		86.85	0.32	48.92
	82.39	0.17	35.44		75.49	0.33	53.48
	82.22	0.28	34.5		84.91	0.35	42.46
	87.86	0.17	37.73		80.18	0.32	44.56
	86.32	0.28	39.29		86.99	0.29	48.38
	90.1	0.16	30.71		86.4	0.35	43.87
	79.99	0.18	31.83		75.61	0.3	35.27
	80.55	0.24	33.65		75.19	0.38	35.54
	93.57	0.3	39.98		83.76	0.33	41.59
	80.33	0.16	44.68		85.84	0.45	41
	87.66	0.27	42.25		81.92	0.38	53.68
	87.78	0.13	35.69		81.28	0.43	37.24
	82.75	0.27	35.77		86.88	0.31	46.23
	82.2	0.17	39.02		75.16	0.33	41.94
	87.36	0.27	30.43		81.66	0.31	35.67
	84.86	0.27	36.47		86.56	0.3	50.44
	85.85	0.15	44.24		75.68	0.28	36.1
	82.35	0.17	34.6		75.09	0.3	42.57
	81.56	0.25	41.57		75.05	0.45	42.29
	84.72	0.18	34.72		83.78	0.28	44.7
	86.77	0.29	34.22		75.99	0.41	44.01
	88.54	0.27	42.79		85	0.33	39.8
	85.33	0.25	39.41		78.55	0.45	54.81
	86.68	0.15	39.89		78.8	0.37	40.77
	81.78	0.26	40.23		76.67	0.43	46.96
	86.8	0.19	40.69		75.38	0.39	53.65
	82.8	0.18	31.05		87.89	0.45	51.55
	77.85	0.19	44.5		88.13	0.38	44.42
	90.03	0.22	34.16		78.81	0.39	51.73
	83.77	0.13	43.34		82.9	0.35	40.69
	92.62	0.28	29.25		77.73	0.33	40.17
	91.65	0.16	37.98		83.5	0.44	41.22
	86.47	0.26	32.83		77.54	0.31	49.47
	91.39	0.14	44.83		87.16	0.31	42.29
	89.45	0.15	29.27		76.48	0.41	45.36
	85.59	0.23	33.11		87.66	0.37	36.9
	82.86	0.21	41.62		75.39	0.38	42.91
	90.83	0.24	38.73		82.15	0.42	43.18
	79.23	0.16	31.21		84.07	0.38	38.86
	85.32	0.3	31.87		76.58	0.33	54.92
	84.6	0.17	41.92		82.45	0.28	49.17
	79.49	0.18	37.54		77.82	0.37	40.06
	79.47	0.27	27.76		82.68	0.29	36.06
	82.27	0.3	37.3		84.16	0.42	47.78
	86.64	0.16	27.84		75.83	0.31	54.46
	90.39	0.16	44.54		77.02	0.44	39.2
	90.16	0.21	32.27		76.71	0.35	36.22
	86.96	0.2	36.34		87.58	0.37	47.02
	84.21	0.3	42.07		78.68	0.39	52.89
	82.95	0.16	44.36		77.3	0.44	43.05
	78.1	0.2	28.45		77.66	0.42	35.24
	90.64	0.27	40.47		86.17	0.45	35.46
	88.44	0.22	40		75.83	0.35	51.44
	82.4	0.23	36.06		80.35	0.38	54.06
	80.28	0.26	39.31		81.16	0.28	48.47
	85.06	0.26	30.25		78.04	0.36	46.88
	92.88	0.29	28.81		75.01	0.36	36.03
	85.57	0.23	43.84		84.23	0.3	48.99
	79.58	0.17	28.91		76.62	0.37	50.57
	84.38	0.27	35.86		84.22	0.32	53.8
	87.39	0.27	44.6		79.45	0.33	48.11
	86.1	0.16	32.15		82.25	0.44	51.94
	82.58	0.14	33.24		83.04	0.3	36.58
	86.68	0.25	44.7		75.54	0.3	50.55
	80.6	0.14	42.42		85.52	0.29	53.21
	84.5	0.13	29.05		79.19	0.4	41.55
	93.52	0.13	27.79		85.85	0.4	37.16
	87.05	0.26	36.41		84.78	0.29	52.95
	79.43	0.3	30.6		77.5	0.35	41.27
	93.12	0.23	29.46		79.48	0.32	50.89
	90.31	0.13	41.77		85.64	0.39	37.07
	77.48	0.17	27.48		76.29	0.36	53.61
	85.67	0.29	33.41		83.55	0.33	49.36
	84.59	0.28	27.74		75.34	0.31	44.74
	79.41	0.19	40.52		85.32	0.42	53.21
	81.39	0.27	37.22		79.85	0.44	51.71
	81.55	0.27	40		80.84	0.33	41.51
	88.78	0.28	33.03		78.01	0.29	41.08
	80.47	0.23	31.67		79.92	0.3	36.92
	83.05	0.19	32.49		79.83	0.34	50.57
	78.04	0.21	41.77		83.12	0.31	52
	91.72	0.2	43.16		87.05	0.39	51.16
	80.28	0.24	29.03		81.65	0.41	37.49
	93.97	0.22	44.59		76.88	0.42	41.02
	89.64	0.28	32.25		86.48	0.29	44.26
	88.57	0.26	44.56		86.41	0.4	44.5
	77.03	0.18	28.09		75.44	0.3	36.21
	80.09	0.25	34.07		77.67	0.41	39.28
	77.67	0.28	30.78		78.55	0.33	44.49
	93.21	0.23	36.38		77.78	0.38	35.53
	88.13	0.29	44.35		78.53	0.37	42.4
	86.52	0.17	40.37		82.18	0.37	37.73
	88.01	0.29	27.62		83.23	0.41	48.06
	91.49	0.18	41.96		84.89	0.31	46.55
	78.16	0.15	40.71		87.49	0.32	35.16
	84.73	0.27	38.68		80.93	0.4	49.76
	81.13	0.16	35.51		88	0.33	53.41
	91.9	0.24	39.7		75.27	0.31	44.06
	80.61	0.15	34.2		80.48	0.41	53.96
	85.64	0.26	38.13		86.12	0.38	37.77
	78.67	0.24	29.76		82.38	0.29	51.54
	89.86	0.21	42.31		85.75	0.35	52.71
	88.69	0.15	36.74		75.32	0.37	52.98
	79.82	0.27	37.38		79.27	0.43	52.49
	90.31	0.29	39.79		84.1	0.36	48.02
	91.65	0.14	44.26		86.29	0.4	37.59
	91.44	0.2	32.04		87.89	0.3	54.29
	77.4	0.27	42.69		77	0.37	44.81
	84.61	0.18	37.54		85.53	0.3	36.69
	89.33	0.28	35.57		81.46	0.34	49.21
	90.73	0.28	43.97		86.15	0.37	52.99
	84.82	0.16	43.8		77.52	0.44	53.4
	82.75	0.3	44.7		85.56	0.39	53.99
	88.17	0.16	43.15		83.79	0.43	50.1
	91.83	0.29	34.84		88.09	0.39	40.06
	88.7	0.28	33.04		77.66	0.45	42.41
	92.18	0.24	38.05		87.95	0.32	36.63
	81.19	0.14	42.24		79.56	0.29	50.83
	88.41	0.21	28.5		84.16	0.3	45
	90.35	0.13	31.94		81.72	0.33	45.06
	83.46	0.23	36.55		79.51	0.37	50.78
	82.44	0.18	35.89		83.01	0.3	51.62
	86.77	0.27	41.11		83.39	0.42	54.08
	83.33	0.17	37.18		81.36	0.44	41.42
	90.71	0.16	43.2		86.61	0.4	37.76
	86.9	0.17	42.43		77.27	0.31	36.3
	91.63	0.21	41.99		78.72	0.44	44.3
	84.1	0.15	44.05		83.35	0.37	37.13
	83.6	0.2	28.83		83.82	0.34	43
	83.66	0.13	31.49		85.16	0.32	52.04
	78.48	0.14	29.81		75.24	0.42	43.68
	78.39	0.16	39.36		81.07	0.34	50.04
	79.31	0.17	38.43		78.17	0.33	51.79
	80.6	0.14	39.56		83.7	0.44	50.94
	83.07	0.17	31.97		85.17	0.3	53.22
	89.34	0.3	39.88		76.04	0.28	38.43
	77.42	0.17	27.44		83.57	0.35	36.02
	77.27	0.15	39.43		85.85	0.33	48.38
	93.79	0.2	36.23		76.95	0.3	53.62
	85.6	0.14	37.29		80.78	0.3	54.02
	77.23	0.18	42.94		77.28	0.45	43.26
	82.59	0.19	43.84		87.8	0.38	44.51
	92.66	0.19	44.86		76.1	0.35	41.17
	79.74	0.22	29.46		87.07	0.33	50.47
	82.75	0.24	30.7		78.44	0.41	40.01
	91.79	0.19	33.17		86.95	0.35	37.1
	93.13	0.19	39.01		83.12	0.38	42.72
	88.63	0.24	32.43		86.26	0.35	40.14
	92.11	0.16	33.53		83.01	0.42	40.87
	77.24	0.22	33.27		86.98	0.32	41.86
	86.18	0.18	27.83		83.93	0.3	54.71
	79.36	0.22	31.64		81.64	0.37	48.35
	85.42	0.17	42.31		83.79	0.33	36.89
	84.96	0.24	28.17		78.14	0.45	48.63
	86.9	0.21	36.68		75.2	0.32	44.23
	88.14	0.26	35.94		83.11	0.42	42.76
	78.47	0.22	39.61		78.81	0.31	50.88
	87.47	0.21	38.47		75.55	0.31	51.25
	91.05	0.14	41.81		77.35	0.42	37.75
	79.58	0.17	43.96		76.84	0.42	39.14
	77.68	0.21	36.33		78.5	0.39	40.19
	88.15	0.23	35.93		82.11	0.4	48.4
	86.79	0.26	44.63		75.44	0.42	50.89
	83.35	0.26	34.91		76.04	0.33	38.02
	80.25	0.3	41.7		80.87	0.39	43.06
	85.27	0.15	31.52		87.62	0.36	50.08
	81.58	0.21	37.34		75.4	0.42	52.89
	84.98	0.16	42.37		83.95	0.45	38.22
	93.53	0.2	27.88		76.37	0.33	54.48
	77.98	0.28	44.8		85.34	0.41	36.28
	93.84	0.13	39.17		80.8	0.37	39.93
	91.1	0.23	37.06		87.62	0.36	43.05
	83.13	0.25	33.95		76.66	0.4	50.01
	90.36	0.24	29.73		86.2	0.29	52.72
	93.35	0.21	28.82		80.82	0.29	41.58
	79.54	0.24	32.52		85.25	0.34	54.65
	79.49	0.23	39.3		77.34	0.43	49.84
	82.09	0.25	42.73		77.14	0.28	39.29
	83.35	0.16	42.69		80.34	0.42	53.73
	83.01	0.3	38.97		85.51	0.43	44.75
	80.03	0.2	43.13		81.26	0.36	39.45
	83.98	0.16	29.9		84.48	0.44	39.23
	81.06	0.23	39.01		75.5	0.38	50.16
	81.95	0.3	30.48		84.41	0.38	35.66
	89.13	0.15	37.1		87.33	0.42	53.8
	88.42	0.18	36.52		77.42	0.3	53.49
	89.9	0.24	39.88		85.38	0.36	46.73
	88.97	0.15	27.42		75.63	0.3	39.33
	77.93	0.23	27.21		84.44	0.44	41.22
	83.09	0.15	29.91		82.91	0.38	45.69
	79.01	0.28	36.45		78.19	0.4	42.1
	78.81	0.2	38.25		81.32	0.36	36.89
	88.75	0.21	32.01		86.37	0.33	44.63
	91.78	0.15	28.29		76.43	0.33	50.91
	77.69	0.26	42.31		83.6	0.45	53.31
	92.31	0.27	30.63		75.19	0.29	36.44
	93.05	0.3	37.86		80.33	0.28	36.5
	92.37	0.24	41.25		80.24	0.41	35.56
	91.31	0.14	27.59		84.83	0.32	45.17
	92.87	0.15	37.12		87.45	0.43	46.78
	87.58	0.25	43.2		80.78	0.39	53.4
	81.87	0.29	27.91		86.22	0.34	50.92
	77.03	0.13	34.35		87.08	0.28	46.74
	78.24	0.19	33.59		84.44	0.38	38.73
	84.33	0.16	40.9		81.46	0.28	36.33
	79.73	0.18	41.09		87.45	0.4	38.55
	92.39	0.25	29.16		88.01	0.32	48.1
	81.58	0.27	34.53		85.92	0.36	54.98
	81.31	0.15	27.63		81.65	0.3	40.53
	81.09	0.22	29.58		80.16	0.4	47.57
	79.62	0.14	38.3		87.16	0.32	46.33
	91.25	0.24	35.42		82.8	0.4	51.23
	92.44	0.27	43.18		78.36	0.28	48.8
	79.13	0.24	35.09		76.24	0.32	54
	88.78	0.19	36.08		85.48	0.39	54.97
	79.08	0.29	27.4		78.16	0.37	48.66
	81.54	0.22	43.38		85.72	0.42	53.58
	77.36	0.15	33.45		86	0.4	49.52
	92.8	0.23	28.01		77.56	0.39	52.09
	77.1	0.22	27.95		84.93	0.44	51.14
	82.85	0.22	31.03		87.88	0.39	44.18
	83.11	0.27	35.86		84.25	0.43	46.21
	80.29	0.26	44.41		84.93	0.28	41.86
	89.72	0.18	29.54		83.75	0.4	46.34
	78.17	0.17	43.7		87.16	0.33	36.34
	92.07	0.3	40.07		82.6	0.44	45.68
	93.44	0.25	40.98		85.8	0.4	44.48
	84.97	0.16	40.51		79.27	0.4	39.57
	91.42	0.22	27.45		78.59	0.41	50.78
	90.53	0.26	34.33		78.05	0.36	44.81
	83.62	0.25	39.97		78.51	0.36	44.68
	78.29	0.2	39.58		76.86	0.41	39.37
	85.63	0.29	41.06		76.63	0.42	43.09
	90.94	0.18	31.67		85.24	0.31	40.88
	81.81	0.29	44.57		79.37	0.34	47.26
	88.25	0.27	40.48		75.4	0.32	54.56
	85.07	0.25	30.47		87.91	0.38	52.84
	83.32	0.29	33.63		84.9	0.43	49.35
	77.52	0.14	39.77		83.54	0.32	38.12
	80.88	0.23	28.58		84.24	0.38	43.05
	87.37	0.18	30		79.63	0.3	36.2
	82.63	0.2	40.03		85.2	0.33	42.22
	92.91	0.3	38.9		78.98	0.31	47.01
	87.37	0.23	32.03		76.68	0.35	54.88
	83.38	0.17	28.38		80.46	0.35	52.41
	78.27	0.29	34.85		76.81	0.28	43.04
	78.17	0.21	43.3		85.5	0.39	40.82
	89.12	0.15	42.32		85.04	0.34	51.76
	77.69	0.29	36.15		81.86	0.42	40.93
	84.95	0.18	35.24		75.61	0.42	52.06
	93.2	0.14	43.95		83.26	0.39	54.85
	90.6	0.27	41.57		79.44	0.32	38.75
	93.47	0.25	31.58		81.77	0.41	41.12
	81.49	0.26	27.05		80.48	0.41	45.21
	84.02	0.21	39.32		78.04	0.3	38.57
	77.56	0.15	35.6		77.28	0.43	46.17
	92.73	0.18	38.78		87.52	0.35	49.99
	90.72	0.24	33.79		84.41	0.42	36.61
	89.07	0.16	43.13		83.38	0.29	42.15
	88.35	0.25	29.35		86.86	0.34	51.01
	86.96	0.16	27.96		84.51	0.32	54.03
	93.21	0.21	41.3		80.66	0.34	39.1
	85.21	0.19	38.08		77.64	0.42	51.7
	89.25	0.23	33.15		81.19	0.41	37.34
	88.39	0.22	41.58		86.07	0.31	41.74
	78.52	0.29	43.54		87.38	0.36	45.47
	92.18	0.2	32.01		87.83	0.39	53.54
	83.35	0.17	28.1		81.4	0.43	53.27
	83.95	0.15	36.98		86.37	0.31	39.01
	78.59	0.29	28.74		84.51	0.3	41.93
	92.7	0.24	39.04		77.75	0.41	41.56
	87.89	0.23	43.18		76.79	0.33	53.59
	90.83	0.29	34.99		80.9	0.41	49.44
	80.21	0.19	29.82		77.47	0.37	41.34
	81.71	0.26	32.64		76.68	0.4	49.25
	92.79	0.25	27.41		85.27	0.28	40.92
	86.16	0.24	40.81		80.9	0.35	39.08
	87.8	0.27	30.08		76.48	0.34	36.29
	80.91	0.27	32.92		77.49	0.38	42.54
	83.21	0.18	43.6		87.62	0.39	42.54
	90.2	0.25	37.1		86.26	0.36	46.4
	85.29	0.22	34.32		86.18	0.38	50.11
	82.08	0.22	42.12		79.66	0.32	39.55
	87.12	0.14	35.63		83.56	0.31	38.8
	78.3	0.19	35.52		86.73	0.38	36.51
	78.1	0.27	42.28		76.2	0.33	35.5
	78.22	0.15	43.62		79.55	0.4	42.08
	80.96	0.19	41.57		87.35	0.31	51.68
	93.61	0.17	37.61		79.51	0.29	49.34
	78.66	0.18	41.53		78.49	0.37	44.66
	86.69	0.24	39.92		77.15	0.35	35.1
	78.03	0.16	41.33		76.77	0.37	43.28
	78.55	0.3	39.46		75.33	0.3	46.4
	89.61	0.19	37.01		75.12	0.38	45.85
	82.58	0.23	42.11		87.01	0.37	46.5
	93.09	0.24	27.34		76.48	0.45	39.02
	85.93	0.19	29.75		86.41	0.44	53.86
	87.39	0.29	41.02		76.66	0.35	45.39
	82.73	0.23	40.57		86.42	0.34	40.4
	80.33	0.28	32.52		78.69	0.35	38.88
	81.66	0.14	40.65		85.73	0.4	41.41
	79.49	0.23	43.56		76.96	0.31	50.48
	86.41	0.28	27.02		85.61	0.29	51.42
	78.42	0.3	40.41		83.17	0.35	40.36
	86.32	0.27	43.62		75.45	0.41	36.72
	81.15	0.19	28.22		83.1	0.29	36.92
	86.46	0.3	27.87		85.54	0.33	49.55
	77.53	0.14	38.57		75.5	0.34	44.94
	92.94	0.28	33.88		86.59	0.29	40.14
	85.82	0.18	38.2		83.79	0.3	41.9
	85.52	0.23	35.2		83.67	0.34	36.47
	83.09	0.3	37.67		75.06	0.35	38.91
	85.05	0.23	33.14		77.66	0.4	42.16
	87.41	0.18	37.76		77.76	0.31	46.26
	77.37	0.14	28.39		75.81	0.32	51.9
	82.58	0.14	41.73		80.12	0.35	41.38
	80.8	0.28	36.91		85.35	0.38	36.12
	86.3	0.25	29.7		87.95	0.37	53.4
	80.23	0.16	39.83		86.78	0.34	50.63
	90.72	0.28	34.06		85.67	0.29	40.49
	92.19	0.27	27.23		79.7	0.28	43.87
	87.86	0.14	32.52		79.22	0.3	35.29
	91.71	0.16	36.96		75.44	0.42	50.82
	85.83	0.27	35.14		86.26	0.38	47.1
	82.78	0.24	42.61		76.73	0.42	41.02
	80.42	0.13	29.72		82.57	0.33	51.71
	87.93	0.23	37.59		81.7	0.33	47.07
	82.87	0.22	43.94		83.96	0.42	51.12
	90.52	0.26	43.16		79.77	0.33	46.46
	78.01	0.14	30.85		82.55	0.43	52.55
	83.89	0.24	30.75		84.79	0.44	46.4
	89.26	0.16	28.99		76.34	0.43	37.28
	78.3	0.14	39.67		76.52	0.36	52.23
	78.7	0.27	27.13		78.83	0.39	48.06
	89.35	0.14	42.61		76.77	0.32	38.24
	80.94	0.27	34.08		81.71	0.31	46.75
	89.5	0.28	32.77		81.34	0.36	52.51
	80.02	0.24	44.83		75.54	0.3	46.95
	93.79	0.21	31.52		84.22	0.37	41.99
	82.68	0.29	40.42		78	0.42	36.15
	92.32	0.16	36.61		82.47	0.35	37.3
	88.07	0.2	39.71		86.76	0.4	37.04
	90.71	0.22	28.88		85.67	0.32	50.48
	89.15	0.14	43.24		83.17	0.37	48.51
	78.54	0.17	34.97		87.82	0.44	44.48
	88.11	0.13	39.72		86.41	0.35	39.5
	78.63	0.26	37.19		85.04	0.35	35.77
	88.18	0.27	43.74		86.11	0.37	42.72
	77.46	0.14	34.59		86.14	0.36	53.52
	93.46	0.24	43.14		81.37	0.34	45.9
	79.86	0.19	27.74		86.77	0.45	47.87
	77.03	0.17	35.94		81.74	0.36	48.68
	83.88	0.21	44.02		78.93	0.44	37.74
	79.44	0.18	42.01		75.15	0.32	48.96
	91.76	0.18	28.11		79.9	0.31	48.29
	85.98	0.21	42.3		76.69	0.39	35.15
	92.57	0.23	36.9		75.95	0.44	46.27
	92.6	0.19	41.83		87.93	0.3	40.49
	89.8	0.25	44.79		80.38	0.45	35.02
	79.03	0.28	40.22		85.49	0.31	45.78
	91.59	0.28	39.8		79.7	0.37	38.2
	82.13	0.23	27.64		86.05	0.39	41.9
	91.04	0.18	38.39		86.76	0.43	39.97
	90.37	0.25	38.08		83.91	0.37	51.86
	91.97	0.19	30.01		84.37	0.28	39.7
	92.36	0.27	42.41		79.26	0.33	51.69
	90.67	0.27	37.19		78.45	0.32	37.21
	84.15	0.14	30.58		76.22	0.34	44.36
	80.27	0.25	36.37		85.85	0.36	45.17
	82.44	0.29	36.35		86.68	0.3	45.07
	78.84	0.23	41.37		85.5	0.32	54.64
	79.46	0.21	38.85		86.02	0.33	47.59
	85.17	0.19	30.25		75.16	0.45	54.14
	77.21	0.22	43.05		76.2	0.43	51.27
	93.09	0.22	38.64		84.8	0.36	51.22
	84.64	0.22	30		82.53	0.38	45.05
	89.51	0.24	38.35		76.35	0.4	49.78
	93.61	0.15	28.59		76.51	0.45	50.73
	92.59	0.15	30.32		76.07	0.36	53.45
	84.42	0.2	41.92		79.25	0.41	50.57
	90.66	0.18	35.46		84.09	0.38	47
	89.56	0.22	41.91		78.87	0.43	38.43
	83.61	0.19	36.76		82.56	0.35	36.62
	80.73	0.27	37.56		79.93	0.35	40.92
	84.14	0.25	33.39		78.54	0.43	37.17
	84.56	0.19	33.58		75.9	0.29	41.09
	85.96	0.13	36.04		79.41	0.43	49.19
	85.8	0.22	34.01		84.99	0.36	45.44
	87.58	0.26	28.08		80.04	0.36	42.43
	89.5	0.13	35.41		85.45	0.36	38.4
	89.79	0.17	44.2		83.91	0.42	39.86
	85.67	0.15	29.63		85.33	0.36	54.82
	77.75	0.28	28.25		80.41	0.4	48.62
	85.09	0.3	29.8		85.9	0.44	35.99
	91.94	0.15	34.61		79.48	0.32	47.71
	88.87	0.23	35.04		85.71	0.34	48.17
	85.21	0.16	33.74		84.13	0.44	36.93
	83.82	0.18	39.02		80.99	0.39	39.38
	86.74	0.28	28.58		86.78	0.37	36.16
	86.25	0.27	29.78		81.84	0.28	44.24
	89.35	0.15	27.32		81.09	0.29	42.99
	91.33	0.14	31.25		78.12	0.38	43.95
	88.59	0.25	38.29		81.21	0.44	36.29
	93.83	0.24	41.72		78.86	0.28	50.01
	80.61	0.14	34.32		80.95	0.44	39.06
	89.12	0.28	33.4		82.74	0.33	49.76
	91.03	0.29	38.29		87.99	0.45	41.16
	84.26	0.24	38.66		79.51	0.31	54.2
	77.4	0.15	38.94		85.21	0.43	39.58
	83.96	0.25	44.48		83.25	0.41	49.21
	93.47	0.14	34.15		78.64	0.45	45.53
	87.21	0.15	38.04		76.05	0.38	50.46
	82.13	0.15	44.44		78.49	0.36	50.87
	92.49	0.14	43.98		84.32	0.36	48.59
	83	0.28	42		76.76	0.32	46.8
	82.96	0.26	35.66		76.19	0.28	38.13
	89.82	0.14	42.87		78.99	0.37	40.89
	84.62	0.27	36.55		81.67	0.3	44.21
	92.97	0.14	35.65		85.59	0.33	42.29
	92.06	0.22	40.12		87.85	0.44	35.62
	92.92	0.25	31.4		76.15	0.32	53.16
	88.05	0.16	27.97		78.86	0.37	52.32
	78.03	0.24	30.91		86.46	0.28	52.3
	83.7	0.18	40.19		87.82	0.4	40.9
	93.41	0.23	38.26		86.8	0.31	41.64
	77.49	0.24	35.49		87.02	0.32	42.98
	93.73	0.24	32.65		84.81	0.45	38.55
	78.61	0.23	41.57		80.08	0.4	37.54
	91.63	0.29	39.98		85.28	0.38	51.76
	80.77	0.2	42		77	0.34	39.47
	93.05	0.15	38.01		79.63	0.37	47.95
	81.72	0.16	29.99		77.01	0.4	48.87
	91.02	0.29	37.29		82.68	0.38	52.14
	83.77	0.26	29.14		77.72	0.29	37.47
	85.18	0.22	43.6		77.6	0.31	37.7
	92.69	0.29	38.9		75.3	0.4	41.51
	83.12	0.13	44.39		84.35	0.37	42.27
	82.53	0.23	28.28		87.25	0.43	51.74
	85.54	0.29	29.24		81.06	0.34	44.1
	82.56	0.16	39.08		77.07	0.38	46.01
	87.99	0.25	40.61		80.31	0.3	35.31
	87.91	0.27	42.11		75.46	0.4	39.49
	84.3	0.23	42.47		86.43	0.29	45.91
	77.68	0.24	29.56		77.65	0.43	47.98
	85.74	0.18	44.89		77	0.32	42.6
	90.72	0.16	29.19		76.59	0.32	42.41
	92.7	0.16	30.8		84.06	0.4	43.72
	77.6	0.17	36.13		78.93	0.43	52.83
	84.2	0.2	33.36		76.67	0.38	37.3
	83.18	0.23	30.99		76.18	0.4	54.03
	81.41	0.23	40.23		81.02	0.44	48.78
	91.25	0.26	38.42		76.23	0.4	44.98
	90.54	0.24	42.81		82.26	0.28	35.87
	83.31	0.14	37.85		75.96	0.36	44.31
	90.23	0.13	40.67		79.61	0.43	48.16
	77.95	0.21	30.34		86.1	0.4	50.21
	87.56	0.29	43.13		85.45	0.35	44.16
	77.68	0.16	29.4		86.14	0.43	38.72
	85.94	0.13	38.95		77.67	0.32	48.75
	79.42	0.3	33.44		81.19	0.42	50.03
	88.11	0.22	44.17		76.22	0.39	42.35
	87.11	0.28	33.28		78.28	0.29	49.7
	78.76	0.17	39.98		88.14	0.3	36.63
	88.76	0.25	38.92		79.14	0.4	37.52
	81.42	0.23	42.45		86.6	0.41	54.8
	81.63	0.13	28.58		76.32	0.28	53.72
	88.92	0.25	43.73		76.41	0.44	38.21
	81.79	0.29	39.72		85.41	0.41	37.35
	79.5	0.28	27.97		80.78	0.34	52.31
	89	0.16	38.2		85.28	0.29	44.46
	93.54	0.24	29.11		83.34	0.43	46
	82.53	0.17	32.93		77.31	0.34	35.62
	90.44	0.22	31.3		81.39	0.28	36.55
	82.95	0.29	39.88		84.41	0.39	35.87
	78.65	0.13	28.82		88.17	0.38	42.22
	91.35	0.2	28.64		77.2	0.3	36.16
	85.46	0.22	38.1		80.65	0.43	44.83
	87.38	0.25	33.18		84.36	0.38	44.86
	88.65	0.26	41.12		80.46	0.36	49.8
	79.48	0.3	31.37		78.39	0.33	40.64
	91.94	0.23	34.68		83.4	0.41	40.19
	88.73	0.21	36.28		84.34	0.44	37.7
	81.81	0.23	28.2		75.3	0.31	40.41
	84.36	0.27	35.89		86.23	0.32	37
	79.32	0.24	29.27		85.13	0.44	38.47
	78.27	0.23	38.32		83.61	0.3	36.12
	88.76	0.23	27.89		75.67	0.39	50.88
	93.96	0.22	42.7		83.4	0.28	38.72
	77.91	0.26	44.71		83.83	0.34	41.33
	86.47	0.15	34.96		82.54	0.31	40.19
	92.13	0.3	37.11		85.07	0.4	35.8
	92.85	0.29	31.43		80.93	0.38	46.18
	85.58	0.24	31.56		83.04	0.38	40.46
	93.91	0.29	44.98		79.15	0.31	35.89
	93.92	0.28	33.76		84.62	0.41	35.9
	81.35	0.24	43.52		81.78	0.35	45.52
	82.88	0.23	42.06		81.98	0.37	45.06
	88.18	0.26	36.04		78.72	0.31	53.15
	83.87	0.23	32.49		83.55	0.38	47.88
	85.18	0.24	44.45		83.9	0.35	43.87
	93.1	0.14	42.48		84.58	0.28	47.38
	85.88	0.24	40.95		79.54	0.32	37.25
	82.83	0.25	36.85		84.87	0.34	46.99
	87.73	0.15	27.12		81.75	0.28	41.93
	84.77	0.3	38.52		83.84	0.34	53.51
	77.59	0.19	30.63		82.37	0.38	42.19
	88.93	0.19	27.86		77.88	0.34	37.91
	89.87	0.19	36.72		82	0.44	38.11
	78.46	0.25	27.11		84.08	0.28	43.09
	85.89	0.19	33.83		80.85	0.36	47.23
	91.95	0.26	36.88		76.4	0.32	51.99
	89.37	0.21	28.38		83.39	0.38	42.98
	82.29	0.28	43.37		79.07	0.34	40.07
	91.16	0.3	29.79		76.55	0.33	51.11
	91.52	0.22	29.17		76.86	0.28	39.52
	91.75	0.18	41.32		82.02	0.4	41.38
	89.44	0.14	34.09		84.83	0.41	48.01
	80.06	0.3	43.37		79.24	0.44	39.96
	90.23	0.29	27.78		88.12	0.43	37.25
	90.4	0.26	28.02		77.61	0.28	48.77
	88.12	0.23	29.3		80.06	0.32	51.67
	84.5	0.22	35.15		75.29	0.38	49.16
	93.07	0.15	37.8		81.09	0.31	53.46
	80.6	0.28	30.75		83.48	0.39	52.78
	91.79	0.16	30.19		75.39	0.28	44.33
	86.14	0.2	32.85		76.86	0.4	52.04
	79.62	0.28	40.59		81.07	0.28	39.77
	93.7	0.16	38.75		79.96	0.3	38.73
	79.06	0.3	27.87		82.73	0.31	54.34
	89.43	0.21	28.9		87.16	0.41	40.69
	80.37	0.24	41.23		86.69	0.42	40.71
	90.36	0.23	35.46		82.97	0.45	51.36
	88.23	0.22	33.02		82.53	0.31	39.79
	83.83	0.23	41.4		85.61	0.36	41.23
	80.82	0.14	43.94		86.04	0.4	44.61
	78.9	0.17	41.37		87.75	0.34	53.41
	86.58	0.14	34.48		76.11	0.43	53.19
	87.66	0.16	36.45		87.27	0.34	35.91
	77.56	0.17	39.13		82.66	0.38	45.84
	86.89	0.29	40.39		75.91	0.42	51.32
	92.16	0.24	39.01		85.45	0.43	49.04
	81.13	0.2	38.91		86.65	0.31	52.07
	80.76	0.27	33.42		77.76	0.31	41.22
	81.59	0.29	34.51		84.79	0.45	52.91
	87.4	0.23	31.19		87.87	0.41	49.87
	87.86	0.26	32.78		81.3	0.32	45.12
	80.46	0.25	27.75		81.03	0.43	36.44
	90.12	0.26	40.91		87.84	0.36	37.86
	86.73	0.26	41.46		75.91	0.38	48.32
	79.39	0.22	36.71		78.04	0.39	53.75
	88.07	0.27	27.89		84.45	0.28	49.34
	80.41	0.14	44.09		88.08	0.42	45.93
	84.81	0.22	33.81		78.27	0.45	51.27
	86.38	0.25	29.31		87.81	0.35	41.35
	79.79	0.24	38.65		75.72	0.33	54.72
	77.43	0.25	44.85		77.08	0.37	49.9
	79.95	0.2	32.87		87.48	0.38	50.35
	84.33	0.22	39.96		80.09	0.37	37.35
	86.03	0.18	30.14		82.81	0.41	54.88
	93.31	0.15	40.47		77.26	0.4	52.5
	77.98	0.13	32.83		82.79	0.3	37.78
	79.93	0.21	42.63		78.18	0.43	40.04
	79.43	0.28	38.99		84	0.39	50.76
	84.38	0.18	33.91		75	0.34	52.05
	88.95	0.2	27.24		76.65	0.37	54.49
	77.16	0.27	41.67		80.17	0.39	54.13
	83.61	0.14	27.34		86.77	0.34	35.04
	83.75	0.17	30.35		78.1	0.42	52.01
	78.82	0.22	43.64		85.32	0.35	38.56
	89.73	0.18	44.16		85.51	0.29	36.97
	86.39	0.16	29.27		86.55	0.45	43.81
	89.86	0.26	40.89		84.92	0.44	54.19
	86.15	0.29	34.79		84.56	0.35	43.15
	82.48	0.19	28.15		80.78	0.3	52.55
	88.47	0.17	41.03		85.31	0.42	44.79
	86.11	0.15	39.94		86.55	0.33	53.16
	80.43	0.28	42.31		75.75	0.43	51.44
	93.97	0.25	43.68		87.61	0.31	35.72
	92.01	0.26	34.57		85.78	0.35	38.91
	84.7	0.27	36.1		78.84	0.31	53.56
	83.76	0.15	29.31		87.21	0.44	43.45
	82.6	0.13	38.11		87.5	0.35	46.84
	92.76	0.23	42.73		85.88	0.32	45.28
	83.21	0.13	38.8		81.22	0.33	41.24
	87.21	0.26	35.04		82.29	0.35	53.98
	92.09	0.18	36.38		77.77	0.38	36.6
	82.96	0.17	38.6		79.28	0.31	38.01
	88.78	0.16	34.13		75.34	0.38	42.2
	77.66	0.14	36.88		81.58	0.45	40.08
	82.33	0.15	40.52		81.06	0.29	37.79
	90.07	0.22	38.29		77.76	0.31	49.61
	80.33	0.14	30.09		75.53	0.32	46.78
	82.49	0.21	29.47		87.03	0.4	46.03
	82.99	0.24	38.71		80.03	0.31	51.43
	85.27	0.22	38.77		81.22	0.3	47.88
	90.7	0.26	43.95		79.29	0.43	46.27
	83.04	0.29	32.72		83.77	0.39	50.46
	81.74	0.18	42.87		83.11	0.41	36.49
	86.75	0.25	36.49		85.37	0.41	39.68
	84.4	0.27	42.15		87.23	0.3	48.14
	88.95	0.14	33.01		76.13	0.35	53.03
	87.23	0.16	37.27		84.75	0.29	44.09
	85.97	0.24	33.71		81.44	0.31	43.9
	81.55	0.28	29.84		84.06	0.38	35.97
	85.63	0.3	37.1		86.35	0.45	35.44
	88.62	0.24	34.41		76.65	0.34	47.51
	89	0.24	35.19		75.69	0.43	35.57
	85.23	0.15	30.09		87.7	0.37	43.16
	88.26	0.26	28.43		86.7	0.39	49.66
	93.6	0.21	34.98		82.93	0.32	53.13
	81.16	0.26	36.75		85.68	0.35	52.87
	91.76	0.26	37.37		75.32	0.42	36.59
	90.02	0.27	31.92		75.36	0.44	40.93
	93.06	0.24	30.39		80.66	0.38	46.78
	89.87	0.18	27.99		85.15	0.44	37.65
	82.48	0.26	42.96		75.14	0.36	54.62
	92.1	0.25	42.42		84.7	0.4	47.63
	92.7	0.18	35		79.03	0.36	36.67
	78.88	0.29	41.64		82.31	0.36	53.77
	86.68	0.26	41.12		82.01	0.29	35.35
	91.98	0.19	33.21		86.29	0.29	44.39
	91.41	0.13	27.94		85.03	0.35	51.42
	91.37	0.17	28.08		83.24	0.38	44.47
	90.26	0.26	43.12		86.47	0.34	38.51
	79.35	0.23	28.62		75.84	0.29	38.04
	77.58	0.26	27.77		77.2	0.44	36.11
	77.22	0.15	40.53		76.44	0.36	38.74
	78.33	0.27	30.31		87.18	0.43	40.22
	85.07	0.28	37.97		80.87	0.32	45.33
	81.31	0.2	42.67		86.82	0.39	38.93
	78.52	0.29	42.42		80.8	0.3	51.85
	79.59	0.17	35.85		86.22	0.32	38.77
	89.7	0.21	39.07		78.76	0.43	35.79
	83.65	0.29	28.1		82.13	0.45	44.99
	82.73	0.16	27.67		76.7	0.32	40.16
	89.14	0.3	32.37		75.81	0.41	48.51
	89.3	0.27	32.87		87.58	0.36	36.71
	91.1	0.17	28.44		76.68	0.33	53.83
	80.25	0.14	41.5		87.79	0.31	51.94
	85.12	0.14	29.22		76.8	0.3	39.16
	91.71	0.28	30.6		88.04	0.41	43.45
	84.85	0.14	31.71		86.32	0.39	46.24
	81.12	0.18	33.11		85.8	0.37	37.35
	93.58	0.26	37.97		84.5	0.42	38.72
	83.55	0.18	34.78		81.99	0.36	37.49
	90.92	0.23	44.17		75.03	0.35	51.28
	83.88	0.14	42.41		75.57	0.42	53.87
	84.42	0.16	38.37		80.6	0.29	48.35
	82.68	0.29	37.02		82.4	0.28	44.4
	87.04	0.21	36.43		79.27	0.33	51.93
	78.54	0.19	29.92		75.37	0.33	36.31
	81.8	0.21	34.26		80.44	0.35	45.31
	93.84	0.15	40.11		76.38	0.45	35.9
	91.12	0.29	43.12		78.21	0.32	45.05
	84.01	0.16	29.79		75.71	0.35	42.37
	78.65	0.18	42.68		75.05	0.34	44.25
	82.4	0.25	44.27		81.22	0.29	46.81
	91.97	0.14	39.37		77.94	0.43	36.92
	86.81	0.16	41.2		84.93	0.37	46.71
	91.33	0.22	38.72		83.03	0.44	49.74
	83.08	0.21	34.45		77.56	0.31	54.63
	81.24	0.24	32.46		78.09	0.31	45.6
	89.55	0.25	34.48		85.4	0.29	53.48
	91.69	0.26	40.17		76.93	0.45	48.87
	85.96	0.22	37.65		82.73	0.38	47.12
	88.6	0.27	30.11		76.5	0.4	40.79
	90.76	0.21	33.51		84.61	0.43	54.25
	81.34	0.21	37.01		85.84	0.29	54.11
	86.21	0.13	36.19		86.96	0.41	39.77
	81.45	0.13	27.2		75.85	0.34	43.05
	79.67	0.15	27.29		81.17	0.37	49.69
	79.61	0.16	42.23		77.53	0.28	39.79
	89.29	0.15	42.22		78.89	0.28	43.77
	81.14	0.13	27.49		81.43	0.38	44.93
	89.3	0.24	44.16		80.02	0.45	50.81
	79.24	0.17	30.89		78.07	0.35	53.47
	79.14	0.16	37.16		79.06	0.36	36.27
	84.64	0.24	41.32		81.52	0.42	38.28
	79.79	0.13	32.13		80.04	0.3	51.96
	86.4	0.18	33.84		87.34	0.37	52.07
	91.47	0.3	42.01		76.19	0.39	52.1
	91.69	0.17	32.41		86.82	0.35	52.7
	82.38	0.26	33.87		83.01	0.43	43.66
	86.3	0.2	40.89		75.95	0.41	50.92
	89.94	0.14	34		84.91	0.44	54.34
	91.96	0.13	42.52		81.37	0.28	41.14
	81.17	0.22	28.27		79.9	0.43	49.94
	83.56	0.22	31.23		75.59	0.34	35.43
	78.98	0.3	37.78		75.07	0.37	49.64
	82.21	0.18	37.62		82.04	0.38	52.55
	92.64	0.22	34.32		82.59	0.42	42.18
	91.4	0.23	28.41		78.72	0.3	53.55
	86.94	0.14	40.89		80.44	0.43	35.08
	92.66	0.26	30.17		77.23	0.36	42.36
	89.33	0.14	42.32		87.76	0.31	42.14
	93.17	0.16	39.77		82.42	0.35	42.7
	84.93	0.14	43.38		87.73	0.43	41.76
	89.16	0.17	43.55		81.43	0.41	53.64
	89.02	0.23	29.68		77.43	0.37	38.02
	91.09	0.29	34.03		82.57	0.45	39.75
	88.42	0.18	29.46		83.97	0.38	38.09
	93.46	0.21	42.09		87.67	0.33	43.29
	79.56	0.19	32.96		82.41	0.44	37.92
	78.81	0.2	44.08		84.71	0.33	45.22
	79.12	0.22	43.15		79.62	0.34	51.51
	79.26	0.15	43.8		83.19	0.35	40.52
	84.76	0.27	43.39		75.92	0.28	52.57
	77.69	0.22	44.54		82.5	0.28	54.87
	85.29	0.23	41.09		87.82	0.42	45.05
	91.62	0.25	41.8		83.02	0.38	46.33
	90.88	0.15	29.45		79.09	0.39	51.54
	85.38	0.22	28.82		87.25	0.39	53.78
	81.64	0.19	34.51		82.84	0.36	52.77
	80.77	0.2	30.46		80.97	0.28	50.46
	87.6	0.23	27.86		85.47	0.35	40.18
	91.09	0.19	36.88		79.44	0.41	37.34
	86.72	0.26	33.57		80.59	0.42	43.79
	79.53	0.16	31.26		87.42	0.29	52.14
	85.83	0.22	44.9		78.77	0.37	39.53
	85.02	0.2	37.22		76.39	0.28	36.78
	79.11	0.16	33.79		82.66	0.4	40.34
	82.36	0.25	33.56		86.18	0.29	51.49
	89.41	0.24	38.79		82.88	0.31	54.52
	77.2	0.26	31.71		81.82	0.35	47.21
	92.29	0.21	36.62		84.7	0.35	46.91
	91.68	0.27	44.56		84	0.44	51.21
	81.73	0.28	38.12		87.76	0.39	47.41
	82.37	0.19	28.64		84	0.42	38.29
	81.3	0.24	43.33		85.55	0.41	51.03
	88.64	0.29	35.96		86.94	0.45	43.1
	82.05	0.23	37.61		82.19	0.43	45.94
	89.62	0.29	27.22		77.34	0.32	40.26
	81.92	0.2	31.93		86.51	0.31	39.56
	89.74	0.23	38.33		83.44	0.29	52.12
	83.47	0.16	36.19		81.95	0.29	39.59
	91.16	0.23	43.51		82.71	0.42	49.01
	78.43	0.28	44.3		86.11	0.29	38.96
	85.13	0.24	43.19		87.27	0.42	42.32
	83.94	0.13	36.79		82.45	0.4	45.09
	77.9	0.21	36.11		83.3	0.32	47.37
	86.9	0.29	32.89		85.11	0.32	46.62
	93.96	0.24	37.32		79.44	0.45	51.17
	79.4	0.19	41.85		86.56	0.28	52.38
	90.96	0.19	27.41		84.24	0.29	47.92
	92.58	0.26	30.11		78.37	0.37	52.38
	84.2	0.27	43.91		85.87	0.33	38.5
	84.62	0.21	27.82		86.77	0.4	39.72
	82.77	0.23	27.16		86.08	0.37	43.38
	84.83	0.16	40.59		76.72	0.28	53.85
	80.55	0.2	35.94		81.03	0.28	46.81
	77.51	0.14	34.15		76.14	0.35	42.59
	86.16	0.21	40.42		86.09	0.42	44.92
	82.9	0.16	35.83		84.9	0.29	48.73
	80.51	0.22	34.93		84.39	0.36	43.27
	83.73	0.22	38.83		78.89	0.37	38.14
	81.53	0.26	40.16		75.42	0.4	51.98
	78.91	0.14	44.98		77.35	0.41	38.56
	86.33	0.13	29.22		86.91	0.35	50.46
	90.96	0.18	44.01		75.41	0.3	48.99
	87.79	0.22	38.7		87.9	0.38	42.61
	78.48	0.22	44.13		85.21	0.45	35.67
	93.84	0.26	31.66		81.89	0.42	41.72
	80.81	0.27	44.26		79.26	0.43	42.87
	80.8	0.13	39.33		82.47	0.38	41.62
	82.76	0.18	42.29		80.64	0.32	45.96
	79.9	0.22	35.6		76.02	0.35	46.36
	77.61	0.2	28.83		85.45	0.31	44.94
	78.81	0.21	40.32		76.54	0.42	36.67
	77.19	0.16	34.21		86.67	0.29	48.51
	79.79	0.16	27.74		87.92	0.33	44.17
	88.07	0.2	34.95		85.8	0.34	40.01
	90.09	0.14	34.72		87.29	0.42	44.4
	91.46	0.21	43.07		85.31	0.37	54.02
	92.76	0.25	40.6		84.38	0.33	50.06
	81.65	0.3	44.97		81.29	0.36	47.43
	77.87	0.25	27.07		85.36	0.32	35.68
	81.59	0.29	43.12		82.59	0.39	41.13
	90.68	0.15	44.77		78.76	0.34	41.76
	78.36	0.19	32.23		82.37	0.42	36.03
	89.77	0.14	28.76		77.32	0.45	39.69
	89.34	0.19	31.97		80.38	0.32	53.4
	80.37	0.22	30.44		85.17	0.3	50.43
	83.46	0.26	43.01		87.59	0.44	52.25
	86.18	0.25	44.6		84.31	0.41	37.5
	93.05	0.24	29.32		78.08	0.29	36.94
	90.83	0.18	31.47		80.29	0.4	52.06
	82.29	0.23	41.89		85.63	0.37	38.76
	79.98	0.24	42.55		79.35	0.31	44.43
	80.13	0.23	30.67		77.51	0.4	39.22
	92.37	0.2	40.82		87.67	0.33	48.55
	91.23	0.18	42.68		81.53	0.45	36.66
	87.61	0.26	35.38		82.26	0.39	43.08
	88.14	0.28	42.14		81.45	0.28	52.99
	90.52	0.29	30.74		86.1	0.29	41.86
	80.32	0.17	29.76		80.87	0.32	49.99
	81.3	0.23	27.84		77.22	0.45	54.26
	83.21	0.25	34.34		81.08	0.37	53.85
	91.56	0.13	28.35		81.55	0.29	46.82
	82.81	0.27	33.78		82.57	0.39	35.16
	87.45	0.27	32.35		82.83	0.31	53.27
	86.14	0.24	36.32		79.52	0.35	36
	92.15	0.15	32.87		87.99	0.31	38.11
	80.34	0.22	44.78		84.63	0.43	35.09
	82.43	0.24	42.44		77.98	0.39	39.27
	90.65	0.14	43.89		81.61	0.35	49.25
	86.68	0.24	36.94		82.68	0.32	50.28
	88.63	0.26	28.35		80.78	0.43	39.51
	78.04	0.14	29.69		76.14	0.4	44.52
	86.26	0.29	41.18		83.94	0.28	47.61
	90.68	0.28	38.58		76.15	0.35	41.01
	84.11	0.29	36.51		76.55	0.42	35.92
	83.38	0.24	33.97		78.03	0.4	36.86
	92.17	0.23	33.38		83.6	0.28	44.58
	90.01	0.28	32.22		79.79	0.32	47.63
	91.68	0.23	39.27		84.9	0.33	36.47
	87.43	0.25	40.63		83.87	0.31	52.87
	92.87	0.17	34.23		77.88	0.43	35.17
	77.08	0.22	29.64		81.36	0.42	51.42
	78.02	0.24	31.9		77.08	0.37	50.68
	88.92	0.27	37.31		87.5	0.31	42.27
	93.69	0.17	42.42		80.39	0.41	39.77
	86.41	0.15	35.13		78.66	0.4	54.25
	85.01	0.15	41.68		83.96	0.36	35.94
	79.5	0.17	31.79		82.98	0.39	43.07
	79.96	0.13	32.4		85.47	0.45	35.83
	92.98	0.18	42.52		87.42	0.4	39.15
	93.96	0.2	34.77		86.65	0.45	45.89
	84.31	0.16	44.33		82.45	0.45	47.56
	82.74	0.27	27.66		86.46	0.41	35.66
	86.93	0.2	32.33		84.99	0.35	37.09
	79.9	0.25	39.85		82.8	0.32	35.26
	93.55	0.3	34.04		81.67	0.44	45.51
	88.41	0.23	43.75		83.63	0.41	37.42
	78.24	0.28	39.63		77.17	0.34	44.96
	80.31	0.15	42.3		86.69	0.34	43.97
	87.17	0.28	33.27		76.89	0.35	38.14
	80.4	0.19	33.32		81.8	0.3	38.52
	88.3	0.29	37.15		82.53	0.38	47.93
	86.99	0.15	31.77		80.24	0.4	44.31
	86.74	0.25	32.42		81.48	0.4	39.29
	93.54	0.22	30.98		84.01	0.38	36
	93.71	0.17	31.63		87.82	0.37	48.04
	85.53	0.14	36.33		76.34	0.45	35.65
	77.39	0.17	28.01		81.26	0.36	41.75
	92.25	0.23	33.79		80.64	0.45	35.97
	86.91	0.19	44.66		81.1	0.44	50.92
	93.34	0.3	29.15		88.06	0.3	50.14
	83.26	0.29	30.8		75.61	0.41	46.8
	89.7	0.14	36.74		80.62	0.34	39.65
	86.59	0.13	32.03		75.68	0.38	40.77
	86.5	0.28	39.55		84.51	0.3	38.91
	90.56	0.21	35.27		79.81	0.34	38.82
	77.1	0.27	36.63		82.83	0.42	37.1
	92.33	0.18	38.16		84.75	0.35	52.61
	77.22	0.13	34.57		78	0.3	43.04
	79.4	0.18	29.58		79.51	0.3	43.96
	84.58	0.17	44.59		84.82	0.35	36.33
	93.16	0.29	38.19		75.06	0.37	44.48
	83.82	0.16	44.87		78.92	0.3	54.1
	92.18	0.21	32.99		80.1	0.34	49.56
	81.9	0.22	34.81		87.29	0.44	47.06
	78.74	0.19	36.06		79.41	0.37	46.72
	86.59	0.2	29.94		86.22	0.42	47.46
	83.85	0.24	40.39		80.82	0.34	47.02
	86.16	0.27	44.25		83.06	0.43	53.2
	78.46	0.24	35.42		88.09	0.35	35.95
	79.16	0.25	35.51		79.59	0.38	46.1
	85.88	0.16	29.97		86.36	0.4	51.05
	81.16	0.21	34.9		84.63	0.43	42.58
	81.53	0.23	39.11		78.6	0.39	45.36
	81.07	0.13	32.52		80.23	0.29	44.22
	87.53	0.24	33.12		82	0.3	37.22
	78.07	0.15	41.78		85.38	0.36	53.23
	81.7	0.15	30.84		83.51	0.37	36.16
	79.95	0.29	29.95		84.02	0.43	51.03
	80.96	0.15	36.87		78.88	0.36	54.98
	86.82	0.17	37.59		84.16	0.33	39.69
	86.05	0.15	40.62		80.5	0.43	39.25
	86.83	0.21	32.8		86.64	0.43	38.44
	82.12	0.19	35.79		75.45	0.42	38.08
	80.88	0.23	42.07		87.95	0.34	45.83
	92.25	0.18	43.19		84.45	0.31	37.42
	80.35	0.27	39.49		78.09	0.39	42.84
	88.59	0.28	28.61		87.99	0.32	41.61
	79.59	0.14	41.37		81.82	0.39	45.95
	86.54	0.17	35.99		82.24	0.3	53.26
	91.02	0.22	43.22		85.06	0.44	52.08
	92.23	0.19	35.11		79.31	0.3	54.71
	82.13	0.18	34.97		86.99	0.43	48.32
	93.31	0.25	31.52		87.26	0.4	45.65
	88.15	0.14	39.43		86.12	0.3	38.89
	82.73	0.27	34.08		76.84	0.35	47.35
	87.29	0.23	29.05		84.5	0.33	45.51
	86.67	0.22	30.19		86.89	0.32	37.89
	86.24	0.2	27.43		87.9	0.32	52.79
	83.48	0.13	34.56		80.95	0.34	47.72
	90.54	0.26	41.32		75.54	0.43	48.24
	81.43	0.24	27.29		87.2	0.39	52.82
	87.91	0.13	43.73		80.15	0.34	46.52
	80.96	0.24	41.76		83.46	0.37	42.82
	86.34	0.15	30.4		78.07	0.31	43.45
	93.26	0.21	34.78		79.05	0.31	46.35
	87.69	0.3	29.77		85.55	0.32	53.08
	92.16	0.28	38.94		87.53	0.45	44.46
	84.1	0.24	40.79		84.41	0.3	38.64
	85.73	0.18	44.99		78.11	0.38	51.2
	89.24	0.21	38.02		84.69	0.32	53.16
	88.48	0.24	30.76		86.29	0.4	42.86
	82.87	0.28	30.93		75.94	0.35	54.17
	87.93	0.28	28.32		87.63	0.28	40.87
	92.26	0.19	34.11		80.28	0.3	47.93
	84.24	0.15	28.89		83.72	0.43	53.8
	89.96	0.25	27.74		79.42	0.36	35.04
	79.67	0.28	39.62		79.06	0.35	43.77
	79.89	0.22	28.01		87.93	0.44	35.58
	92.47	0.2	31.35		76.57	0.32	44.8
	83.13	0.2	37.5		85.48	0.31	44.29
	86.14	0.19	41.39		78.91	0.43	35.76
	77.91	0.21	30.55		75.67	0.32	43.69
	90.74	0.25	43.46		83.3	0.35	47.68
	90.32	0.14	42.88		75.38	0.36	48.58
	88.88	0.13	44.81		87.82	0.39	35.73
	87.59	0.15	40.79		75.04	0.4	46.72
	80.67	0.19	33.5		79.47	0.36	42.9
	87.34	0.17	27.22		78.48	0.37	49.59
	77.49	0.25	41.26		78.93	0.29	49.26
	92.12	0.16	31.19		84.03	0.36	50.39
	81.08	0.26	37.71		86.92	0.38	35.67
	82.6	0.2	30.66		84.93	0.41	39.56
	87.61	0.2	33.69		75.46	0.4	44.53
	89.46	0.23	31.19		76.53	0.44	54.65
	88.4	0.15	35.6		81.95	0.33	53.22
	89.31	0.26	42.81		82.61	0.28	53.68
	88.76	0.29	41.47		76.17	0.44	49.11
	87.09	0.16	44.61		79.73	0.41	53.27
	89.95	0.18	30.99		77.1	0.31	50.92
	92.45	0.29	39.21		85.84	0.43	40.94
	90.86	0.24	41.44		80.71	0.31	35.57
	93.1	0.28	29.31		82.4	0.36	46.03
	89.28	0.17	36.08		78.8	0.28	41.91
	78.69	0.27	28.89		85.9	0.4	52
	80.73	0.14	27.86		80.44	0.43	38.07
	82.96	0.18	36.59		80.79	0.43	54.1
	77.03	0.16	39.05		78.43	0.29	53.61
	85.42	0.16	27.15		87.54	0.29	47.76
	84.88	0.19	38.64		86.93	0.42	47.22
	83.12	0.21	41.12		81.29	0.32	53.9
	81.58	0.28	42.24		87.92	0.3	49.28
	87.72	0.19	41.19		77.47	0.29	48.22
	83.04	0.13	35.05		87.85	0.43	54.81
	79.28	0.2	27.19		83.31	0.3	46.77
	90.58	0.14	27.09		86.85	0.39	53.35
	91.37	0.27	42.1		82.96	0.29	41.82
	81.26	0.23	35.35		88.17	0.3	40.2
	78.57	0.22	42.24		83.82	0.42	36.56
	88.65	0.17	33.1		81.7	0.39	36.78
	93.93	0.16	31.39		81.94	0.39	46.21
	89.97	0.24	29.35		79.77	0.38	48.7
	78.22	0.18	30.07		84	0.34	51.29
	79.71	0.25	38.54		81.83	0.34	51.76
	88.13	0.29	27.97		76.17	0.32	38.99
	89.22	0.25	34.17		75.03	0.28	39.87
	91.72	0.26	34.44		82.5	0.31	38.11
	80.57	0.22	30.04		82.49	0.36	43.71
	77.4	0.24	34.88		79.93	0.32	50.66
	88.14	0.27	30.02		85.3	0.37	35.05
	78.76	0.16	41.02		76.56	0.32	45.48
	91.57	0.27	29.49		81.59	0.44	47.97
	89.39	0.19	43.82		86.47	0.4	49.07
	81.47	0.21	44		81.25	0.43	44.66
	93.96	0.3	35.04		83.11	0.28	47.04
	84.29	0.26	41.4		80.4	0.29	45.43
	79.63	0.25	40.75		86.56	0.36	37.81
	84.58	0.28	40.15		77.73	0.3	37.23
	88.95	0.13	30.73		85.83	0.32	35.94
	86.85	0.15	38.24		80.64	0.43	37.49
	77.78	0.29	39.11		85.24	0.32	51.28
	88.76	0.19	33.21		79.57	0.31	50.84
	93.73	0.24	30.94		82.7	0.39	46.73
	81.73	0.16	38.72		83.23	0.28	43.59
	85.58	0.24	40.26		85.02	0.31	45.03
	90.99	0.19	38.49		77.76	0.43	37.93
	78.24	0.29	28.93		83.73	0.29	40.79
	87.67	0.17	32.72		82.08	0.31	41.94
	80.93	0.14	40.67		78.95	0.45	41.88
	81.09	0.23	31.7		87.62	0.43	43.09
	77.58	0.27	36.83		79.58	0.41	40.26
	90.5	0.21	38.27		80.47	0.44	35.66
	85.85	0.19	39.75		78.8	0.35	41.59
	84.86	0.13	41.26		77.69	0.41	51.92
	77.63	0.29	34.9		81.18	0.38	46.67
	81.57	0.16	38.41		79.39	0.38	42.12
	87.88	0.19	44.25		82.42	0.36	52.62
	77.22	0.25	27.25		80.69	0.32	35.52
	91.44	0.13	37.72		80.17	0.38	41.33
	84.28	0.29	29.31		82.14	0.31	49.46
	93.52	0.21	31.74		82.37	0.33	35.62
	81.13	0.19	27.88		76.26	0.31	49.9
	91.91	0.3	37.94		86.83	0.42	47.86
	78.69	0.3	30.26		81.41	0.44	50.53
	91.89	0.27	42.38		83.89	0.39	43.54
	93.71	0.24	34.2		78.49	0.32	38.3
	82.86	0.15	38.67		75.53	0.35	45.25
	78.59	0.26	33.76		76.19	0.42	40.8
	92.82	0.26	33.17		81.51	0.33	52.42
	90.89	0.17	41.09		85.22	0.36	48.79
	78.85	0.27	42.46		84.86	0.43	44.76
	89.74	0.19	29.37		82.71	0.42	52.5
	93.43	0.2	34.94		87.55	0.41	38.26
	84.57	0.21	33.83		82.95	0.3	47.12
	85.55	0.16	32.62		81.25	0.31	43
	91.27	0.24	33.33		87.28	0.45	38.05
	81.13	0.21	34.1		87.93	0.44	42.81
	93.03	0.27	41.73		80.81	0.43	53.17
	84.86	0.28	44.65		77.52	0.28	46.92
	91.76	0.13	28.17		77.51	0.34	53.85
	84.48	0.14	33.99		84.27	0.29	42.31
	82.2	0.15	34.38		78.44	0.37	47.72
	82.83	0.18	39.59		79.96	0.44	40.49
	86.49	0.27	27.69		76.02	0.43	45.26
	79.84	0.17	42.68		84.04	0.41	37
	86.17	0.16	44.75		85.53	0.3	42.43
	84.76	0.14	28.55		77.71	0.3	48.06
	83.08	0.24	32.03		79.84	0.41	35.11
	87.82	0.16	37.35		81.82	0.38	52.44
	78.01	0.26	43.59		78.32	0.45	43.59
	80.39	0.19	38.36		80.85	0.43	42.11
	77.62	0.26	31.17		80.86	0.42	52.04
	81.36	0.26	29.28		83.22	0.42	53.26
	90.59	0.24	29.26		79.82	0.33	42.96
	86.28	0.22	36.76		77.1	0.4	42.56
	79.74	0.24	37.06		78.61	0.44	54.44
	82.27	0.17	35.86		75.16	0.45	36.18
	78.29	0.14	27.72		88.13	0.33	44
	89.01	0.23	40.14		88.18	0.33	45.94
	87.78	0.13	37.06		80.16	0.41	50.69
	88.7	0.22	34.4		75.72	0.38	43.07
	80.01	0.26	41.72		85.85	0.29	53.11
	79	0.16	39.93		80.83	0.29	52.7
	78.19	0.15	43.11		79.97	0.41	42.81
	85.62	0.19	37.67		85.69	0.39	46.04
	87.11	0.21	33.01		86.56	0.37	48.71
	79.12	0.21	39.49		84.18	0.4	37.17
	80.81	0.27	38.83		88.02	0.33	41.16
	82.25	0.2	41.1		81.74	0.39	38.48
	85.51	0.15	37.52		75.93	0.29	36.13
	83.88	0.24	35.99		81.92	0.32	52.11
	84.5	0.24	29.99		76.67	0.36	49.42
	88.08	0.29	31.2		76.21	0.39	53.23
	86.44	0.3	38.64		86.84	0.44	42.22
	80.88	0.22	37.69		84.14	0.28	37.63
	78.41	0.28	41.98		77.02	0.36	39.6
	92.78	0.14	38.96		80.54	0.36	51.38
	87.42	0.28	29.99		75.58	0.33	46.28
	80.36	0.3	41.4		84.45	0.32	40.32
	92.17	0.13	42.52		78.98	0.41	37.43
	78.68	0.22	42.67		85.07	0.43	39.82
	81.05	0.22	31.68		76.12	0.37	49.82
	77.83	0.18	40.77		76.38	0.32	40.44
	87.39	0.15	41.37		75.07	0.43	50.14
	87.17	0.25	43.88		79.58	0.42	51.01
	87.39	0.24	31.22		82.61	0.38	46.19
	90.28	0.17	38.65		76.44	0.41	47.6
	93.8	0.23	31.31		87.33	0.41	39.2
	90.15	0.23	34.57		86.88	0.39	47.1
	78.11	0.29	40.09		77	0.28	50.35
	83.25	0.24	28.35		77.08	0.3	53.35
	83.72	0.18	32.38		80.73	0.33	38.1
	83.33	0.28	33.67		85.1	0.3	39.45
	86.77	0.17	34.71		75.84	0.32	51.45
	89.28	0.27	34.15		80.41	0.32	41.26
	82.57	0.17	36.23		78.23	0.41	38.89
	92.68	0.25	41.27		86.01	0.36	35.43
	83.14	0.21	36.7		84.27	0.33	37.52
	85.12	0.14	42.37		86.43	0.31	52.24
	92.3	0.13	43.36		81.9	0.44	47.5
	92.69	0.24	32.41		82.37	0.37	45.97
	93.26	0.15	32.6		84.7	0.36	40.62
	82.92	0.24	41.18		75.97	0.44	42.5
	88.69	0.25	41.83		78.4	0.3	52.72
	93.75	0.23	27.6		83.92	0.28	44.57
	82.03	0.29	31.97		76.52	0.35	35.02
	87.29	0.29	32.15		85.45	0.36	38.95
	91.19	0.22	38.42		84.37	0.36	49.6
	92.94	0.15	44.43		75.11	0.3	50.17
	89.8	0.19	35.25		85.59	0.44	41.53
	92.29	0.2	39.64		81.62	0.41	50.03
	90.39	0.15	32.65		76.58	0.31	37.38
	77.41	0.25	38.6		80.71	0.38	50.42
	77.94	0.14	32.73		77.02	0.34	49.65
	86.51	0.29	30.2		86.95	0.37	38.44
	77.7	0.23	44.99		80.94	0.43	44.06
	89.49	0.15	29.14		79.98	0.36	53.3
	90.98	0.26	44.98		77.52	0.35	54.13
	78.17	0.2	34.86		76.46	0.42	54.33
	81.16	0.14	27.52		79.27	0.38	47.07
	86.64	0.23	32.13		81.83	0.36	45.75
	92.52	0.18	35.39		85.88	0.3	40.34
	86	0.15	39.06		87.84	0.42	38.33
	90.94	0.18	35.96		80.82	0.29	36.32
	77.35	0.28	36.04		80.72	0.42	38.46
	89.88	0.26	43.18		77.65	0.38	49.58
	77.88	0.2	28.61		75.86	0.32	36.75
	79.55	0.27	29.38		76.93	0.42	48.14
	78.9	0.2	37.77		80.3	0.4	35.66
	85.88	0.23	40.15		82.51	0.34	37.96
	83.82	0.17	33.01		84.01	0.45	38.47
	91.4	0.19	32.09		80.61	0.37	52.15
	92.71	0.28	29.62		80.23	0.4	50.38
	82.7	0.3	35.79		82.5	0.36	39.14
	82.22	0.21	40.89		86.48	0.35	37.77
	93.69	0.18	38.03		83.34	0.33	40.67
	89.92	0.26	39.94		85.93	0.33	47.55
	82.7	0.3	30.88		85.33	0.42	45.6
	83.72	0.21	37.21		78.48	0.34	40.18
	81.48	0.22	40.12		78.81	0.3	44.92
	83.71	0.13	35.99		84.29	0.3	41.56
	86.73	0.25	40.75		83.52	0.32	52.45
	88.67	0.15	36.96		82.96	0.39	36.77
	92.45	0.16	27.76		86.21	0.36	54.06
	91.57	0.22	29.17		80.61	0.36	43.22
	81.87	0.16	36.92		83.87	0.29	42.97
	93.45	0.29	29.66		83.09	0.44	47.28
	93.74	0.15	29.53		85.96	0.41	51.75
	77.04	0.28	31.35		84.17	0.44	35.95
	86.09	0.17	33.94		78.96	0.4	45.87
	89.3	0.28	41.16		86.61	0.38	37.02
	82.92	0.23	27.75		86.61	0.37	52.22
	86.34	0.18	31.27		76.22	0.36	49.21
	91.52	0.16	42.68		76.25	0.37	41.25
	85.44	0.3	42.79		80.29	0.32	46.46
	86.43	0.22	29.93		76.32	0.31	52.72
	85.94	0.3	32.2		75.39	0.34	47.78
	80.97	0.23	44.7		83.48	0.28	42.9
	82.82	0.13	41.6		77.75	0.36	47.13
	85.31	0.25	29.83		81	0.3	46.96
	90.16	0.16	37.42		85.83	0.32	42.65
	77.67	0.24	37.59		86.15	0.45	46.67
	85.97	0.18	31.87		80.84	0.39	36.81
	84.3	0.17	29.12		85.31	0.28	51.85
	84.71	0.25	30.56		84.72	0.33	38.9
	79.8	0.14	43.98		79.15	0.38	45.22
	92.73	0.27	29.32		81.02	0.3	35.11
	89.99	0.26	34.16		87.3	0.43	47.14
	90.03	0.22	44.56		87.11	0.36	36.81
	82.61	0.16	40.46		86.53	0.37	35.59
	87.29	0.22	36.03		79.31	0.3	36.36
	77.78	0.2	30.92		83.36	0.38	50.71
	84.59	0.16	34.12		75.11	0.43	48.31
	93.13	0.15	30.75		78.16	0.34	40.43
	79.26	0.18	32.65		82.56	0.44	38.99
	88.81	0.13	33.75		81.82	0.43	41.44
	90.62	0.27	32.97		85.64	0.4	44.64
	85.05	0.29	38.79		81.33	0.29	43.38
	77.51	0.14	35.71		86.32	0.39	47.54
	86.27	0.25	42.1		87.19	0.28	54.32
	77.97	0.3	36.07		79.94	0.43	36.39
	82.79	0.19	37.32		82.76	0.41	54.09
	93.26	0.19	34.44		82.14	0.28	45.76
	91.59	0.22	28.2		87.75	0.32	43.36
	78.8	0.21	36.24		76.04	0.41	45.9
	78.17	0.25	35.62		84.88	0.31	53.97
	85.07	0.3	41.77		77.12	0.33	42.79
	92.99	0.14	37.78		87.39	0.4	39.08
	81.48	0.15	32.21		78.51	0.37	50.91
	77.87	0.13	38.81		78.27	0.4	43.52
	82.29	0.28	30.54		86.43	0.33	45.96
	77.79	0.28	36.71		84.78	0.4	48.65
	84.74	0.24	43.18		80.64	0.35	51.45
	91.78	0.24	39.72		80.25	0.41	51.8
	89.1	0.25	30.58		75.64	0.42	38.69
	78.79	0.15	29.93		75.02	0.43	37.82
	81.2	0.19	42.81		82.76	0.32	38.07
	82.03	0.18	27.41		79.49	0.3	54.05
	84.55	0.18	34.03		84.06	0.29	41.42
	84.44	0.16	28.61		88.14	0.33	41.46
	78.23	0.15	35.51		82.01	0.4	46.02
	78.87	0.19	44.64		83.57	0.3	40.9
	87.13	0.19	33.61		75.36	0.39	49.23
	88.7	0.28	30.13		76.08	0.38	35.85
	83.22	0.2	40.18		81.31	0.31	52.84
	80.76	0.18	44.03		87.81	0.35	48.05
	83.54	0.22	34.1		79.17	0.33	43.89
	92.93	0.27	29.55		86.79	0.3	36.18
	83.8	0.13	29.68		76.27	0.4	41.67
	91.29	0.23	28.02		77.49	0.39	45.84
	82.22	0.19	44.01		85.72	0.44	45.69
	90.8	0.17	41.1		77.8	0.41	38.24
	92.49	0.16	35.16		79.07	0.31	53.67
	82.38	0.3	36.45		77.38	0.33	47.52
	91.75	0.23	42.62		84.68	0.43	51.41
	78.63	0.26	32.67		84.14	0.37	36.39
	77.81	0.21	34.59		80.95	0.33	38.1
	85.65	0.29	44.51		82.65	0.34	39.62
	90.25	0.23	36.73		78.28	0.43	40.09
	87.13	0.2	37.05		81.48	0.29	36.23
	86.15	0.19	42.34		77.41	0.43	42.52
	81.86	0.22	28.14		84.59	0.45	40.16
	85.43	0.22	41.59		80.59	0.41	40.56
	91.56	0.22	32.41		86.08	0.4	44.31
	84.86	0.25	37.43		75.44	0.36	49.21
	79.87	0.26	39.81		76.28	0.3	44.53
	85.2	0.15	44.31		75.56	0.38	53.87
	93.09	0.13	42.62		75.22	0.31	53.51
	85.54	0.18	40.84		79.47	0.35	38.53
	93.68	0.21	32.81		75.14	0.3	48.39
	84.67	0.28	44.58		86.25	0.45	50.74
	90.43	0.3	35.67		78.02	0.43	46.9
	86.8	0.19	33.35		82.99	0.37	35.8
	83.59	0.15	35.72		78.63	0.29	44.63
	80.91	0.22	29.58		79.16	0.42	50.34
	83.35	0.24	32.56		77.67	0.45	50.5
	85.42	0.27	38.24		79.17	0.35	47.61
	93.34	0.2	30.22		80.65	0.39	45.08
	86.68	0.22	43.94		87.08	0.32	48.75
	82.74	0.23	30.87		80.01	0.33	53.49
	87.99	0.29	42.33		85.98	0.42	48.61
	87.64	0.24	42.18		85.38	0.41	40.89
	91.85	0.29	40.44		84.31	0.4	45.66
	79.65	0.19	37.95		87.38	0.43	43.08
	85.15	0.28	38.09		83.5	0.38	48.33
	89.78	0.23	41.55		80.83	0.34	37.05
	92.77	0.21	44.99		87.74	0.44	45.15
	90.4	0.23	43.18		86.27	0.4	47.9
	86.24	0.28	33.78		83.94	0.41	51.85
	80.69	0.27	39.08		85.8	0.33	42.23
	85.41	0.13	32.1		75.81	0.28	46.05
	91.18	0.21	41.98		79.68	0.45	39.84
	79.71	0.29	41.92		76.67	0.37	36.3
	77.36	0.15	27.72		87.37	0.31	54.97
	89.05	0.16	38.97		84.86	0.33	50.23
	78.43	0.15	33.48		86.92	0.33	39.5
	82.88	0.26	29.63		82.86	0.44	36.69
	89.35	0.19	44.3		76.2	0.39	37.49
	86.23	0.24	42.55		78.04	0.42	42.6
	81.95	0.23	42.59		84.02	0.33	43.74
	78.24	0.29	42.46		78.13	0.31	40.91
	79.27	0.28	30.74		76.46	0.3	39.89
	90.63	0.15	35.32		78.96	0.34	35.85
	84.83	0.19	38.19		75.2	0.44	46.93
	86.79	0.3	41.56		78.83	0.3	44.91
	92.16	0.24	28.22		87.18	0.4	42.42
	85.28	0.2	39.85		87.63	0.34	38.06
	84.96	0.17	31.81		82.97	0.38	52.45
	82.27	0.14	39.56		76.13	0.32	49.8
	89.53	0.18	32.32		85.48	0.4	40.04
	93.58	0.2	39.63		76.11	0.36	35.46
	79.64	0.21	28.48		80.81	0.39	48.02
	85.73	0.14	28.53		81	0.34	36.78
	80.73	0.27	36.12		87.24	0.39	43.5
	93.43	0.26	34.39		78.59	0.33	38.93
	87.71	0.22	33.59		83.3	0.36	36.5
	90.3	0.16	37.05		75.89	0.43	49.33
	80.23	0.24	28.2		85.47	0.29	36.44
	88.49	0.22	37.29		76.36	0.42	36.84
	78.08	0.16	38.39		84.67	0.36	53.4
	82.25	0.21	27.81		80.73	0.36	35.92
	93.74	0.24	38.32		87.8	0.33	48.86
	84.27	0.21	44.12		80.22	0.37	52.53
	80.48	0.27	32.02		75.02	0.4	41.08
	81.74	0.26	42.3		86.26	0.36	41.54
	77.26	0.21	43.72		84.1	0.34	37.18
	79.56	0.27	41.44		76.66	0.45	50.3
	89.64	0.28	44.79		75.48	0.34	40.03
	85.89	0.29	31.77		82.15	0.42	41.3
	81.57	0.17	40.15		77.86	0.29	37.33
	84.66	0.21	44.56		84.36	0.32	53.82
	77.94	0.19	29.6		87.82	0.31	39.54
	77.69	0.22	37.19		78.02	0.45	49.52
	82.44	0.29	36.91		79.12	0.43	37.29
	92.35	0.27	28.7		80.63	0.34	44.23
	79.67	0.2	27.97		75.39	0.41	46.52
	84.76	0.22	39.54		82	0.33	39.62
	80.54	0.17	33.69		79.18	0.43	42.57
	93.9	0.2	43.68		82.89	0.33	36.57
	85.87	0.25	32.95		83.62	0.29	39.17
	87.41	0.19	34.93		87.93	0.32	40.13
	81.18	0.3	28.38		75.21	0.28	46.79
	93.68	0.16	30.05		80.75	0.37	53.29
	92.23	0.25	32		75.21	0.3	39.31
	79.13	0.23	28.54		87.23	0.43	44.65
	81.2	0.2	31.06		78.74	0.32	35.94
	82.55	0.25	43.39		86.2	0.42	38.4
	87.35	0.18	39.67		79.33	0.36	52.72
	90.11	0.3	30.03		81.82	0.28	47.57
	77.84	0.14	27.07		80.86	0.38	36.71
	87.74	0.23	37.02		84.74	0.37	41.62
	84.7	0.13	42.73		85.16	0.32	54.01
	79.94	0.25	27.53		82.34	0.33	37.74
	89.24	0.19	27.84		83.15	0.3	49.38
	82.67	0.14	30.29		82.9	0.29	51.63
	84.58	0.27	37.62		88.14	0.42	44.15
	80.25	0.26	41.43		86.19	0.36	38.99
	84.97	0.21	34.2		76.19	0.35	38.74
	89.46	0.29	38.89		75.44	0.29	49.12
	78.63	0.28	42.09		87.59	0.41	49.57
	88.27	0.26	42.14		80.51	0.43	37.01
	88.56	0.14	32.05		86.64	0.39	36.77
	86.29	0.28	39.05		82.79	0.45	42.24
	86.86	0.27	41.91		76.46	0.35	51.08
	93.44	0.19	35.43		75.91	0.33	44.02
	81.24	0.24	28.81		81.88	0.4	36.98
	93.1	0.3	34.5		81.26	0.43	39.52
	87.63	0.14	40.34		82.77	0.37	52.33
	77.95	0.3	42.16		75.49	0.29	35.75
	90.5	0.27	31.63		85.6	0.29	47.39
	85.1	0.26	32.21		80.97	0.45	52.25
	92.97	0.19	29.31		83.91	0.41	52.87
	81.05	0.13	32.8		84.61	0.38	48.55
	84.88	0.14	30.16		81.64	0.42	35.39
	86.42	0.16	41.87		81.84	0.34	37.58
	83.16	0.26	38.73		80.8	0.44	38.57
	82.17	0.23	34.23		82.25	0.36	40.74
	87.21	0.29	43.42		76.17	0.29	53.26
	77.57	0.17	41.31		78.59	0.44	53.8
	80.83	0.28	32.89		84.99	0.37	37.88
	85.23	0.19	29.05		78.83	0.33	54.95
	82.03	0.18	41.07		77.88	0.35	49.9
	84.36	0.16	27.97		83.75	0.37	48.91
	92.85	0.14	42.68		79.33	0.4	44.34
	92.36	0.16	39.49		79.4	0.38	38.54
	84.5	0.14	32.03		87.77	0.29	42.59
	88.55	0.27	27.96		83.6	0.38	54.45
	91.14	0.26	37.57		83.8	0.42	52.24
	79.09	0.18	40.53		78.42	0.32	53.89
	79.7	0.14	33.63		84.99	0.3	36.6
	84.55	0.21	41.02		85.47	0.37	45.36
	89.84	0.22	41.97		84.09	0.41	44.83
	92.84	0.15	36.06		82.21	0.34	51.2
	81.98	0.24	33.35		77.95	0.39	52.48
	87.41	0.3	37.98		82.88	0.43	50.88
	88.01	0.13	43.56		76.99	0.41	36.32
	83.95	0.15	44.07		79.45	0.37	49.12
	80.16	0.16	33.31		86.69	0.37	38.83
	87.05	0.21	43.62		78.33	0.36	48.3
	89.28	0.27	33.32		75.11	0.42	42.04
	85.31	0.26	44.98		86.72	0.36	50.45
	83.45	0.14	27.43		77.83	0.42	53.32
	87.37	0.23	33.51		75.64	0.44	40.89
	83.95	0.28	29.92		78.83	0.41	52.03
	83.04	0.13	38.14		83.54	0.39	52.31
	78.31	0.22	35.51		82.41	0.35	48.08
	84.91	0.16	39		75.61	0.36	47.8
	83.23	0.25	27.44		83.73	0.31	38.62
	80.66	0.25	40.38		79.29	0.3	45.18
	89.13	0.27	44.9		83.2	0.4	54.55
	85.52	0.24	27.24		77.61	0.44	37.01
	91.02	0.26	38.92		87.19	0.37	49.68
	82.19	0.23	37.13		83.85	0.45	50.68
	82.18	0.18	44.12		81.99	0.36	39.27
	83.88	0.14	31.29		80.24	0.36	45.28
	86.48	0.28	44		80.57	0.41	47.93
	79.45	0.28	37.46		84.03	0.29	53.93
	88.95	0.29	38.84		79.3	0.33	54.28
	88.66	0.3	28.81		85.58	0.43	47.42
	79.67	0.27	28.64		84.21	0.34	46.91
	81.12	0.17	28.64		78.46	0.43	44.84
	77.76	0.2	32.79		84.62	0.4	40.13
	83.64	0.28	43.86		77.73	0.36	39.34
	88.95	0.22	41.92		78.57	0.37	42.89
	77.65	0.22	31.66		79	0.44	39.2
	77.92	0.28	35.53		81.97	0.37	52.64
	78.38	0.16	44.67		80.1	0.29	46.82
	87.61	0.24	33.95		75.53	0.34	43.38
	83.69	0.21	42.46		86.79	0.32	48.59
	93.24	0.18	35.1		77.02	0.3	51.39
	77.75	0.17	33.91		80.19	0.35	36.5
	84.03	0.25	33.45		77.22	0.3	39.6
	91.11	0.14	37.17		86.98	0.32	41.7
	78.12	0.17	30.07		77.84	0.3	42.01
	89.68	0.27	37.72		83.78	0.29	50.02
	80.77	0.23	40.28		83.62	0.45	46.86
	88.22	0.23	34.86		83.16	0.4	39.26
	79.57	0.27	30.14		83.67	0.37	42.88
	85.06	0.16	34.43		86.82	0.37	54.97
	92.83	0.19	39.41		85.72	0.44	47.45
	81.5	0.2	35.87		75.26	0.43	53.08
	91.51	0.27	34.99		86.37	0.31	47.04
	93.37	0.24	32.01		79.57	0.42	50.72
	79.24	0.15	32.76		78.14	0.39	54.73
	87.08	0.29	31.55		76.1	0.28	50.39
	92.38	0.14	43.56		81.98	0.32	47.18
	80.56	0.16	42.86		84.18	0.35	52.92
	89.28	0.3	30.67		79.36	0.33	53.97
	81.15	0.28	38.96		81.71	0.33	40.61
	78.43	0.24	30.71		81.01	0.3	50.14
	80.72	0.17	38.67		76.74	0.38	42.93
	80.11	0.2	38.04		87.05	0.34	46.79
	80.98	0.13	32.26		81.43	0.42	54.74
	90.87	0.13	32.07		79.32	0.28	46.04
	80.36	0.18	42.6		83.79	0.33	46.83
	81.26	0.28	35.49		83.68	0.36	45.91
	79.28	0.29	42.06		79.4	0.4	44.77
	89.21	0.15	32.28		78.24	0.37	42.58
	85.34	0.15	28.94		78.03	0.34	45.45
	80.42	0.15	44.95		76.37	0.42	51.09
	88.34	0.21	39.19		76.64	0.44	52.96
	83.66	0.29	36.59		84.53	0.39	41.41
	87.08	0.3	33.23		79.47	0.39	43.67
	92.17	0.3	29.7		81.57	0.44	51.23
	91.76	0.25	32.54		85.04	0.31	45.04
	86.21	0.28	38.3		80.11	0.3	50.05
	80.23	0.17	37.71		82.69	0.39	41.01
	91.19	0.28	43.96		83.63	0.28	42.54
	81.51	0.19	27.81		84.66	0.45	35.89
	92	0.14	27.11		79.81	0.33	41.56
	90.89	0.14	41.92		87.98	0.32	52.26
	77.39	0.23	31.57		76.34	0.43	37.99
	81.08	0.2	40.02		84.25	0.33	51.59
	82.3	0.17	30.75		86.77	0.33	52.9
	86.29	0.21	31.14		79	0.29	48.65
	92.88	0.24	43.41		81.69	0.29	40.29
	77.12	0.15	37.47		79.7	0.37	54.46
	84.13	0.2	28.78		87.43	0.29	39.03
	89.53	0.2	27.75		80.21	0.42	42.03
	91.56	0.21	29.41		83.98	0.3	39.74
	77.68	0.2	27.06		84.03	0.4	38.35
	77.77	0.17	36.33		86.36	0.32	51.77
	90.05	0.29	38.07		77.92	0.37	54.03
	92.84	0.17	28.41		80.79	0.34	46.51
	90.16	0.13	44.37		80.28	0.32	44
	79.93	0.25	31		81.25	0.45	54
	91.45	0.21	43		85.53	0.45	48.33
	88.71	0.16	38.59		79.74	0.32	35.19
	93.38	0.27	42.82		80.1	0.39	54.66
	93.63	0.25	44.95		82.33	0.34	41.11
	91.76	0.13	31.34		80.06	0.3	41.6
	77.09	0.22	41.68		85.99	0.3	43.97
	85.23	0.17	36.68		84.14	0.3	51.6
	80.69	0.29	40.29		77.71	0.39	40.99
	89.68	0.18	36.06		75.25	0.45	50.08
	84.32	0.25	42.87		84.36	0.39	44.1
	83.11	0.23	41.01		85.18	0.37	42.51
	86.27	0.18	33.15		80.8	0.41	43.92
	87.54	0.27	31.12		78.8	0.42	41.71
	83.39	0.23	27.91		76.48	0.34	40.75
	82.04	0.16	44.8		80.46	0.39	49.87
	80.99	0.2	37.88		87.67	0.32	49.64
	89.28	0.24	32.43		82.71	0.41	46.72
	82.91	0.17	28.71		78.33	0.37	43.79
	88.7	0.14	38.19		78.34	0.29	51.56
	78.19	0.28	28.38		77.06	0.38	39.18
	91.89	0.17	31.11		77.52	0.36	51.15
	84.2	0.14	44.31		81.94	0.34	42.13
	87.77	0.17	33.4		77.73	0.29	42.14
	86.74	0.15	42.71		79.93	0.3	44
	90.94	0.13	33.58		85.88	0.33	35.35
	77.7	0.3	33.64		81.16	0.32	46.49
	88.39	0.16	31.85		83.17	0.31	43.26
	77.57	0.25	30.89		86.81	0.43	38.49
	83.92	0.16	41.14		75.38	0.28	42.49
	84.64	0.25	33.98		86.8	0.42	45.98
	82.71	0.25	39.13		84.62	0.39	52.24
	80.9	0.27	40.31		87.5	0.28	40.58
	93.06	0.26	37.4		75.81	0.44	53.74
	86.32	0.14	37.96		86.97	0.39	38.58
	85.33	0.28	27.2		79.84	0.36	54.49
	78.08	0.22	37.7		76.77	0.36	40.31
	78.83	0.13	33.01		86.73	0.34	43.05
[truncated: 6,855 more rows]

## Sheet: GoogleNet
	SFEARA(GoogleNet)				GoogleNet
	acc	sirt	ec		acc	sirt	ec
	87.59	0.282	38.53		85	0.66	60.73
	82.52	0.282	35.11		84.37	0.74	58.79
	93	0.34	33.95		87.92	0.74	60.17
	94	0.28	38.32		94.13	0.69	56.05
	89.89	0.342	36.93		93.75	0.74	57.39
	88.1	0.33	42.66		83.73	0.67	66.21
	94.27	0.322	40.01		91.24	0.67	63.53
	81.2	0.292	42.19		88.97	0.68	63.24
	89.47	0.33	35.42		87.61	0.67	64.08
	82.49	0.282	34.63		91.65	0.7	58.09
	90.89	0.31	36.05		84.24	0.64	56.6
	91.69	0.342	43.54		93.62	0.66	59.06
	83.65	0.312	36.55		88.71	0.72	56.5
	82.85	0.282	33.47		93.22	0.73	63.93
	88.06	0.35	35.95		87.42	0.7	63.18
	89.45	0.34	32.17		92.33	0.66	60.16
	90.97	0.29	42.52		89.32	0.64	63.95
	88.63	0.33	37.52		85.93	0.65	59.19
	90.86	0.332	39.93		85.48	0.73	61.74
	82.87	0.32	40.04		86.98	0.74	64.46
	87.46	0.282	38.17		92	0.73	57.22
	89.12	0.34	39.72		90.06	0.74	61.44
	94.82	0.302	44		85.1	0.64	58.71
	82.11	0.33	34.45		84.47	0.7	58.44
	80.12	0.32	36.21		90.02	0.67	64.55
	80.49	0.312	36.28		92.71	0.74	58.6
	93.65	0.3	39.3		90.06	0.69	60.11
	93.96	0.33	43.08		93.2	0.72	59.73
	85.71	0.28	41.2		82.77	0.69	62.07
	82.1	0.342	37.49		90.03	0.73	57.28
	88.01	0.29	43.2		87.85	0.65	61.94
	90.66	0.29	40.25		87.13	0.72	59.62
	80.45	0.322	34.67		87.3	0.67	56.63
	81.57	0.292	36		93.09	0.74	61.66
	91.94	0.31	42.81		91.24	0.69	56.13
	84.26	0.292	38.9		85.38	0.71	64.69
	84.69	0.302	37.24		88.28	0.74	61.76
	91.67	0.31	33.02		88.17	0.72	59.35
	89.99	0.312	40.84		94.22	0.65	59.26
	86.16	0.3	43.73		94.06	0.69	56.69
	91.4	0.342	41.77		88.62	0.68	57.03
	84.81	0.312	43.12		87.79	0.66	60.15
	90.98	0.32	33.16		86.3	0.71	63.33
	80.38	0.28	39.05		85.33	0.64	63.41
	82.81	0.32	37.89		84.38	0.72	62.6
	91.93	0.292	38.12		86.66	0.63	62.16
	91.21	0.35	34.41		89.17	0.64	58.66
	93.84	0.312	32.53		88.02	0.67	59.75
	89.85	0.322	42.16		90.29	0.66	63.39
	86.39	0.332	43.37		89.28	0.67	61.77
	87.24	0.28	35.37		87.14	0.67	60.56
	90.91	0.282	36.64		84.37	0.7	58.64
	85.96	0.28	38.18		88.64	0.74	63.89
	81.62	0.28	41.82		86.59	0.73	66.86
	84.48	0.29	42.36		84.52	0.68	56.07
	92.34	0.342	41.48		89.82	0.67	61.35
	83.3	0.34	37.26		83.29	0.65	64.38
	84.97	0.28	42.73		86.41	0.74	59.47
	88.5	0.312	37.35		83.47	0.71	59.12
	80.1	0.342	41.47		83.78	0.68	63.48
	93.08	0.302	38.11		83.59	0.65	66.05
	88.07	0.34	43.22		83.92	0.62	61.98
	80.93	0.33	39.84		94.94	0.67	58.91
	87.91	0.34	34.79		88.32	0.7	60.87
	79.84	0.282	33.2		91.39	0.72	58.74
	94.07	0.332	38.17		93.8	0.68	62.72
	91.25	0.302	37.57		86.78	0.63	62.58
	92.56	0.282	43.87		93.63	0.66	64.93
	90.22	0.282	37.51		82.56	0.65	57.03
	81.97	0.28	37.55		86.9	0.68	63.41
	87	0.28	42.37		84.61	0.64	64.93
	84.18	0.3	40.98		94.1	0.67	56.65
	91.36	0.342	43.62		82.93	0.72	65.29
	83.46	0.31	39.13		86.69	0.66	58.66
	83.73	0.322	37.77		92.61	0.65	55.58
	81.72	0.322	41.23		88.79	0.73	63.82
	92.34	0.32	33.83		94.21	0.71	59.08
	89.19	0.272	38.13		90.78	0.67	57.8
	82.51	0.292	36.51		89.16	0.63	55.11
	91.85	0.29	42.36		87.9	0.71	64.98
	92.64	0.322	43.58		84.5	0.68	66.49
	93.99	0.31	37.39		82.88	0.72	55.72
	90.11	0.332	34.08		91.68	0.75	57.24
	93.73	0.29	40.43		84.94	0.7	55.9
	85.67	0.332	37.71		91.14	0.71	58
	84.84	0.28	35.24		83.19	0.66	61.65
	85.07	0.33	32.02		93.77	0.7	59.55
	94.03	0.322	40.48		94.27	0.63	61.29
	94.09	0.29	42.27		92.53	0.63	63.96
	82.09	0.302	33.97		91.25	0.74	62.43
	89.91	0.29	42.27		84.78	0.68	60.7
	88.24	0.272	38.19		85.33	0.66	65.36
	86.26	0.3	41.73		90.17	0.74	58.39
	94.8	0.34	40.61		86.33	0.72	59.79
	88.4	0.33	33.7		94.58	0.63	61.02
	89.01	0.3	37.36		88.71	0.75	65.33
	92.94	0.29	35.51		90.24	0.74	66.35
	92.84	0.28	39.44		92.35	0.68	65.78
	86.56	0.332	34.71		88.05	0.7	59.39
	86.1	0.32	42.97		86.62	0.64	63.45
	84.07	0.34	39.39		89.06	0.73	55.13
	80.27	0.31	32.17		84.11	0.72	61.36
	80.82	0.3	33.13		90.61	0.7	59.37
	94.35	0.342	32.06		90.53	0.69	58.54
	90.16	0.342	36.75		93.8	0.62	56.28
	80.94	0.342	32.01		94.45	0.74	61.35
	94.98	0.34	39.42		87.63	0.66	59.55
	80.45	0.292	40.77		91.48	0.65	65.24
	91.88	0.32	34.22		88.86	0.71	58.38
	89.2	0.34	38.5		88.5	0.68	64.44
	94.17	0.32	32.14		85.54	0.64	58.58
	80.37	0.332	43.01		89.05	0.68	63.63
	80.06	0.32	33.38		89.82	0.72	55.34
	94.46	0.282	37.76		93.91	0.73	57.6
	84.46	0.332	41.01		92.19	0.65	61.96
	87.55	0.312	34.41		85.27	0.72	58.36
	92.21	0.322	38.74		94.17	0.72	62.02
	91.47	0.33	36.56		94.26	0.7	64.63
	87.88	0.282	43.39		84.05	0.66	64.45
	90.63	0.342	41.53		82.31	0.64	58.93
	92.97	0.322	36.32		83.98	0.71	62.7
	85.76	0.3	34.81		89.05	0.65	61.02
	93.01	0.292	32.76		83.32	0.7	64.78
	93.75	0.3	37.54		90.25	0.69	63.64
	94.11	0.302	41.86		92.5	0.64	57.69
	87.58	0.342	32.27		91.81	0.69	55.15
	83.88	0.312	37.66		91.2	0.72	58.49
	80.1	0.33	35.16		88.81	0.68	66.1
	91.88	0.302	34.71		91.96	0.65	57.09
	85.93	0.35	36.7		87.1	0.63	57.83
	89	0.29	41.29		92.8	0.67	63.54
	94.35	0.32	32.13		84.27	0.71	64.94
	93.39	0.34	36.4		89.25	0.73	60.23
	93.82	0.31	32.04		85.24	0.65	66.73
	92.55	0.312	42.63		88.15	0.65	57.15
	82.32	0.332	43.24		94.36	0.63	64.76
	92.67	0.302	38.96		92.1	0.64	57.78
	93.22	0.34	33.26		94.78	0.66	55.79
	90.74	0.292	34.23		91.67	0.71	56.98
	89.21	0.342	41.33		88.88	0.63	59.46
	89.71	0.33	39.69		85.98	0.72	55.74
	81.12	0.34	32.26		91.98	0.7	57.06
	93.5	0.312	36.9		84.9	0.73	64.74
	94.4	0.33	40.88		90.9	0.64	62.61
	94.55	0.35	34.64		83.62	0.72	62.68
	83.07	0.302	43.16		84.07	0.66	64.05
	90.4	0.272	34.68		88.84	0.74	66.49
	91.17	0.35	40.43		85.21	0.67	66.69
	80.5	0.282	38.98		85.87	0.66	57.32
	87.85	0.292	40.02		93.22	0.63	61.63
	82.42	0.322	36.47		91.45	0.7	57.11
	89.94	0.3	40.08		87.27	0.66	63.15
	93.93	0.33	38.75		93.31	0.73	55.95
	86.2	0.322	36.29		91.13	0.73	55.94
	88.31	0.322	32.67		84.85	0.75	62.79
	87.35	0.31	32.73		90.42	0.68	59.79
	80.66	0.292	37.23		82.88	0.72	64.06
	83.51	0.342	38.51		85.29	0.71	63.3
	85.89	0.35	34.09		92.83	0.73	57.91
	82.69	0.34	42.88		90.09	0.72	55.19
	84.5	0.302	42.7		83.44	0.71	58.42
	89.93	0.322	35.3		85.68	0.63	64.08
	87.73	0.32	37.06		92.66	0.63	56.59
	92.82	0.32	32.73		92.72	0.75	62.01
	82.04	0.332	41.32		93.42	0.75	56.3
	83.23	0.302	33.48		84.94	0.66	56.12
	89.38	0.302	38.24		89.91	0.71	55.09
	87.99	0.322	34.47		88.8	0.68	55.87
	82.61	0.312	43.91		88.34	0.71	59.58
	92.84	0.34	40.94		89.45	0.72	66.94
	88.68	0.272	35.96		86.61	0.69	66.13
	83.54	0.332	34.13		87.69	0.66	61.52
	80.5	0.332	32.31		91.67	0.72	63.15
	90.9	0.332	38.55		88.48	0.68	59.62
	81.78	0.312	39.57		91.39	0.68	56.09
	82.03	0.33	43.46		86.6	0.67	61.5
	86.9	0.312	38.8		94.34	0.66	66.43
	93.11	0.312	42.41		92.75	0.67	58.48
	80.52	0.312	36.58		82.5	0.68	60.38
	92.45	0.3	33.99		88.91	0.69	65.21
	81.85	0.29	43.49		88.16	0.7	66.1
	84.35	0.292	43.6		87.95	0.71	56.23
	86.31	0.282	38.23		82.28	0.69	56.67
	81.98	0.32	35		85.24	0.73	60.51
	81.34	0.292	34.8		93.21	0.67	55.47
	87.44	0.34	34.33		90.12	0.73	56.17
	90.92	0.29	39.22		84.99	0.63	56.84
	94.47	0.28	35.92		94.01	0.7	58.02
	94.56	0.282	36.49		93.32	0.72	63.6
	84.49	0.282	36.32		89.84	0.74	56.74
	82.48	0.34	35.98		87.72	0.63	55.89
	90.82	0.33	40.13		87.21	0.67	58.63
	93.18	0.28	43.75		89.63	0.71	62.53
	85.88	0.282	33.27		94.68	0.64	55.45
	88.44	0.282	37.35		84.97	0.72	58.01
	88.73	0.28	36.65		88.74	0.7	58.04
	80.89	0.33	33.84		87.42	0.69	64.23
	85.78	0.312	38.54		89.85	0.73	55.36
	93.33	0.31	35.76		88.6	0.71	60.02
	94.51	0.292	36.98		86.23	0.63	66.06
	80.32	0.272	32.54		82.84	0.7	63.42
	82.31	0.28	42.81		85.41	0.71	60.33
	89.23	0.292	36.11		89.2	0.73	64.15
	85.42	0.34	41.49		86.72	0.7	64.91
	93.68	0.28	41.26		84.77	0.63	66.72
	88.75	0.33	39.37		94.22	0.72	55.94
	81.12	0.3	39.03		87.54	0.74	65.22
	82.17	0.342	35.65		94.79	0.74	60.23
	83.3	0.32	34.9		82.61	0.7	64.39
	83.38	0.312	40.19		89.47	0.66	58.36
	90.44	0.29	43.5		93.54	0.63	65.68
	82.97	0.272	40.23		83.62	0.71	61.98
	80.43	0.29	33.55		84.48	0.73	59.61
	88.93	0.302	39.82		86.32	0.69	59.92
	87.3	0.342	38.15		83.24	0.71	59.45
	82.63	0.29	32.85		84.54	0.7	65.05
	86.33	0.312	37.64		90.99	0.69	63
	89.51	0.29	40.88		94.91	0.66	64.64
	81.7	0.322	41.91		90.63	0.72	56.77
	84.42	0.312	43.67		88.27	0.7	60.16
	83.23	0.28	42.29		87.69	0.63	62.87
	82.68	0.322	33.18		91.44	0.65	63.74
	90.46	0.312	35.36		85.04	0.67	65.19
	93.63	0.332	38.36		87.93	0.65	62.88
	84.37	0.32	36.43		90.65	0.69	66.08
	85.03	0.342	40.23		93.95	0.74	57.78
	80.45	0.3	34.78		88.53	0.64	57.72
	85.64	0.282	34.63		83.63	0.69	55.47
	85.11	0.332	34.35		83.58	0.63	57.92
	86	0.34	39.62		89.2	0.72	64.19
	92.27	0.32	34.47		89.72	0.7	59.43
	84.41	0.292	36.39		94.88	0.73	60.43
	91.26	0.28	37.8		88.29	0.68	63.24
	90.45	0.312	35.9		88.72	0.63	60.39
	92.26	0.332	32.25		82.76	0.73	65.46
	86.71	0.322	38.21		88.5	0.7	60.82
	87.64	0.312	35.78		84.11	0.67	64.28
	91.14	0.29	43.37		94.57	0.69	61.72
	88.27	0.3	35.25		90.02	0.7	60.23
	84.92	0.34	33.1		88.84	0.7	55.23
	80.27	0.272	32.79		88.63	0.63	57.29
	84.95	0.34	37.75		83.69	0.69	57.14
	88.2	0.28	42.07		83.28	0.74	58.81
	80.84	0.332	34.11		92.41	0.65	60.81
	87.56	0.302	38.31		92.15	0.7	63.53
	83.79	0.33	40.32		83.13	0.72	62.85
	83.11	0.292	37.93		87.94	0.68	60.86
	85.33	0.342	40.89		82.65	0.72	59.15
	94.27	0.342	36.41		82.75	0.66	62.27
	93.48	0.3	32.72		83.48	0.74	61.26
	84.57	0.33	42.01		89.9	0.66	57.64
	81.21	0.32	36.7		92.59	0.74	58.28
	83.01	0.292	37.96		92.98	0.64	65.58
	82.99	0.292	33.75		84.2	0.67	56.25
	80.86	0.342	43.82		83.46	0.68	58.7
	81.41	0.342	42.27		85.74	0.75	64.12
	93.56	0.292	40.59		84.04	0.68	58.46
	83.89	0.3	32.9		87.05	0.65	60.9
	85.08	0.35	37.86		87.9	0.65	61.43
	92.25	0.28	34.2		94.65	0.75	59.53
	93.83	0.342	36.17		92.82	0.66	55.39
	94.49	0.31	39.83		91.98	0.7	58.45
	85.43	0.3	39.08		92.51	0.65	61.28
	86.87	0.31	36.61		86.37	0.64	58.73
	88.7	0.3	41.55		84.69	0.71	65.81
	80.98	0.312	38.37		84.75	0.64	66.87
	89.44	0.292	38.11		85.89	0.74	62.68
	82.8	0.302	32.4		86.19	0.72	64.91
	94.9	0.28	42.81		94.51	0.63	66.87
	91.76	0.292	34.75		85.74	0.66	66.4
	88.1	0.302	36.19		93.04	0.66	55.39
	87.19	0.342	42.28		86.19	0.7	58.65
	91.57	0.3	34.99		87.72	0.7	61.09
	82.99	0.332	38.2		89.59	0.71	57.96
	93.49	0.34	41		85.66	0.74	61.71
	86.15	0.31	33.17		87.26	0.67	63.75
	94.01	0.32	34.29		91.36	0.72	64.41
	86.63	0.28	40.74		83.54	0.72	59.93
	86.25	0.29	33.46		89.63	0.7	65.71
	89.69	0.282	35.42		93.31	0.66	59.05
	88.5	0.28	32.51		91.26	0.65	66.98
	86.3	0.332	32.03		84.62	0.64	66.78
	92.62	0.35	40.57		88.8	0.74	62.89
	94.87	0.28	41.82		82.98	0.63	58.17
	86.8	0.32	42.1		91.43	0.74	65.19
	90.77	0.28	35.57		92.55	0.72	57.03
	80.21	0.32	32.04		92.69	0.75	65.22
	90.16	0.31	38.7		94.69	0.65	63.67
	92.01	0.34	40.76		86.05	0.7	57.92
	88.26	0.342	32.96		87.46	0.68	55.21
	90.77	0.32	37.96		85.61	0.64	65.57
	89.22	0.32	36.77		82.82	0.7	56.87
	90.87	0.3	43.48		90.46	0.67	57.59
	83.6	0.33	39.38		94.51	0.69	60.74
	84.11	0.312	34.98		94.89	0.71	61.84
	86.17	0.282	39.23		83.94	0.64	56.89
	87.81	0.35	39.81		88.6	0.68	61.25
	91.29	0.322	42.89		87.35	0.65	64.62
	92.23	0.31	33.48		94.44	0.74	59.58
	86.14	0.302	40.59		86.27	0.63	62.35
	87.25	0.32	40.99		94.11	0.65	61.62
	92.8	0.312	41.97		94.88	0.73	55.22
	88.1	0.302	42.38		94.48	0.68	66.03
	88.75	0.3	36.83		91.21	0.63	57.68
	92.67	0.342	41.78		82.2	0.71	63.95
	94.42	0.29	38.95		91.57	0.73	58.79
	89.62	0.28	38.42		93.22	0.69	56.38
	92.22	0.282	41.44		91.44	0.67	58.89
	90.02	0.34	35.03		90.82	0.73	65.1
	80.96	0.33	32.89		84.55	0.75	58.73
	92.25	0.282	35.84		83.01	0.63	63.5
	91.83	0.3	41.04		89.51	0.74	64.29
	86.5	0.29	34.87		89.83	0.63	59.5
	82.25	0.322	38.1		83.55	0.65	62.6
	83.67	0.312	36.58		93.87	0.65	59.11
	85.18	0.35	34.95		88.27	0.7	63.75
	89.18	0.32	32.96		93.31	0.68	59.67
	89.25	0.332	36.82		93.87	0.71	55
	83.61	0.332	32.14		84.58	0.74	60.52
	82.68	0.33	42.42		93.17	0.67	62.35
	85.47	0.312	38.2		94.31	0.63	58.31
	93.85	0.32	33.41		94.76	0.73	55.05
	83.83	0.342	34.86		89.67	0.65	62.47
	82.67	0.322	35.45		93.7	0.68	66.86
	90.75	0.33	36.35		86.42	0.64	63.57
	85.55	0.342	35.94		85.34	0.63	62.55
	83.01	0.312	34.14		94.47	0.74	62.45
	86.67	0.29	36.55		89.17	0.65	65.2
	87.86	0.302	43.71		84.55	0.73	63.42
	90.83	0.312	42.82		86.17	0.67	66.27
	93.56	0.35	34.66		93.94	0.65	65.29
	93.43	0.342	39.98		90.33	0.66	66.1
	87.19	0.272	34.2		86.1	0.72	58.98
	90.88	0.342	38.88		90.79	0.73	55.49
	94.89	0.29	37.79		82.97	0.66	61.47
	82.36	0.32	33.45		90.14	0.63	56.48
	83.33	0.33	37.16		91.97	0.74	55.52
	93.4	0.34	38.24		92.18	0.69	55.71
	81.16	0.33	35.82		83.84	0.68	66.7
	87.46	0.282	33.49		93.91	0.72	56.4
	81.5	0.342	35.92		90.34	0.65	64.32
	83.31	0.322	32.44		88.18	0.69	62.42
	94.7	0.332	34.09		84.94	0.73	58.81
	91.63	0.33	37.75		88.65	0.73	57.16
	89.79	0.34	41.63		84.36	0.66	64.55
	81.98	0.33	37.52		83.25	0.7	63.84
	87.69	0.342	42.59		84.77	0.71	64.54
	92.52	0.31	39.11		90.21	0.71	63.82
	93.47	0.28	41.37		87.89	0.68	64.58
	86.86	0.332	33.48		91.78	0.71	56.64
	93.79	0.332	40.3		85.82	0.67	64.32
	88.19	0.302	32.76		92.84	0.69	60.84
	80.83	0.29	35.49		94.47	0.69	64.99
	87.23	0.35	42.47		86.78	0.72	61
	87.24	0.282	39.81		83.75	0.64	64.21
	93.62	0.342	35.18		88.11	0.67	66.56
	87.88	0.342	33.18		87.69	0.64	66.26
	92.62	0.292	39.42		85.03	0.67	56.17
	89.29	0.332	32.44		94.57	0.71	62.98
	91.48	0.332	43.96		89.78	0.7	58.06
	89.21	0.33	35.94		83.08	0.68	60.27
	86.42	0.332	32.85		93.69	0.71	58.78
	91.24	0.32	35.67		89.68	0.65	55.59
	84.58	0.32	34.94		89.49	0.75	59.21
	86.63	0.282	37.27		91.11	0.66	60.62
	87.59	0.33	43.22		89.91	0.68	59.37
	87.64	0.322	42.66		86.68	0.64	58.12
	91.52	0.35	41.87		92.95	0.68	65.88
	92.89	0.34	35.22		83.15	0.72	59.81
	87.38	0.292	41.64		84.98	0.66	64.3
	86.75	0.31	39.38		91.86	0.74	55.4
	81.95	0.31	32.36		92.21	0.67	66.5
	81.52	0.32	37.29		89.43	0.66	66.41
	80.9	0.28	35.24		91.5	0.7	58.27
	89.72	0.32	41.44		83.08	0.63	56.09
	82.59	0.33	39.04		90.42	0.67	60.16
	86.7	0.29	37.45		92.82	0.64	63.1
	80.57	0.342	38.39		91.08	0.7	61.66
	86.65	0.342	32.72		90.32	0.68	62.65
	90.68	0.302	43.52		86.07	0.66	59.33
	85.17	0.332	42.86		93.76	0.72	59.9
	88.11	0.29	38.47		87.29	0.74	59.38
	80.18	0.35	40.08		92.45	0.68	65.74
	92.36	0.322	39.05		83.45	0.71	65.95
	92.03	0.33	40.31		91.5	0.63	63.46
	83.15	0.332	36.8		91.54	0.64	55.51
	88.93	0.34	36.11		84.54	0.66	55.33
	92.29	0.31	39.39		90.95	0.72	55.97
	81.07	0.31	40.87		92.24	0.73	58.69
	94.26	0.302	41.93		90.5	0.75	65.95
	81.06	0.292	40.65		85.69	0.69	55.66
	85.79	0.292	36.92		88.21	0.68	66.21
	92.05	0.34	42.19		94.54	0.62	56.67
	83.27	0.332	34.44		88.44	0.74	63.18
	89.18	0.332	32.7		91.56	0.7	58.76
	87.23	0.332	35.96		84.77	0.73	60.7
	92.81	0.3	35.1		86.39	0.66	57.41
	92.44	0.302	37.5		84.5	0.64	57.26
	91.57	0.31	40.78		94.75	0.72	61.44
	91.59	0.32	43.71		90.7	0.68	64.32
	90.19	0.35	43.39		83.41	0.74	63.71
	92.34	0.28	38.55		83.37	0.73	63.06
	88.77	0.322	32.89		90.36	0.63	64.92
	90.22	0.31	41.76		85.76	0.66	61.77
	91.67	0.282	40.07		91.99	0.72	64.75
	89.73	0.322	37.28		82.28	0.72	58.26
	88.17	0.31	41.67		91.75	0.68	60.81
	80.97	0.28	34.7		88.88	0.73	59.86
	94.86	0.332	36.26		84.04	0.72	59.63
	91.68	0.342	41.57		92.85	0.69	55.88
	89.81	0.31	35.38		84.79	0.68	58.14
	87.36	0.35	43.07		89.98	0.73	60.09
	94.67	0.342	39.4		84.92	0.65	58.08
	83.29	0.29	38.07		87.22	0.66	55.81
	84.65	0.33	37.97		85.15	0.66	65.24
	83.24	0.292	34.4		86.46	0.72	58.49
	93.21	0.272	43.47		93.28	0.73	66.11
	88.75	0.33	42.88		92.01	0.75	57.95
	81.08	0.332	41.79		92.65	0.74	60.97
	80.01	0.32	35.12		86.14	0.65	57.23
	88.56	0.29	36.04		85.29	0.74	66.74
	83.52	0.29	32.05		82.32	0.63	56.05
	87.29	0.31	39.93		87.17	0.69	62.38
	83.08	0.302	40.14		87.18	0.7	58.38
	80.34	0.34	35.72		86.92	0.74	60.29
	81.03	0.292	34.33		88	0.69	60.37
	92.32	0.312	40.22		83.16	0.64	56.23
	83.36	0.34	42.07		94.15	0.72	55.06
	84.42	0.33	33.07		90.94	0.66	65.24
	90.59	0.302	42.23		85.86	0.65	58.02
	86.5	0.282	42.96		90.74	0.74	64.36
	94.96	0.28	42.28		85.46	0.69	58.16
	94.84	0.342	36.92		83.32	0.74	55.48
	83.08	0.32	42.18		89.91	0.67	56.51
	84.98	0.3	33.57		88.04	0.73	56.17
	86.03	0.28	38.54		83.94	0.63	65.13
	84.45	0.282	41.37		85.35	0.63	57.61
	90.72	0.3	40.9		85.97	0.7	66.78
	87.52	0.3	40.97		94.2	0.7	63.62
	89.77	0.32	34		82.62	0.71	59.94
	94.48	0.32	33.24		86.97	0.67	65.43
	93.59	0.3	36.94		84.3	0.68	59.05
	80.17	0.342	37.32		83.44	0.67	66.37
	93.13	0.272	36.67		90.93	0.68	62.85
	85.78	0.342	36.81		83.07	0.7	59.05
	91.42	0.29	35.45		85.22	0.74	58.31
	85.69	0.31	41.82		94.56	0.67	66.89
	79.9	0.33	37.47		90.88	0.65	57.5
	81.03	0.302	34.64		88.18	0.66	66.78
	88.81	0.272	41.72		89.94	0.72	58.5
	92.37	0.282	34.08		84.69	0.7	65.29
	89.53	0.33	42.43		93.13	0.63	56.68
	85.76	0.302	36.77		89.11	0.7	56.12
	90.18	0.29	32.48		93.31	0.63	62.92
	90.05	0.332	36.36		90.91	0.72	58.35
	93.52	0.3	43.82		85.43	0.69	55.07
	89.54	0.33	42.85		88.63	0.7	56.18
	86.77	0.28	34.69		93.75	0.68	57.32
	84.87	0.33	42.85		91.86	0.66	63.5
	86.67	0.3	42.11		87.21	0.64	62.05
	81.95	0.332	40.38		82.51	0.66	66.68
	86.82	0.28	39.95		82.21	0.7	58.43
	91.24	0.272	39.55		83.1	0.72	60.52
	88.22	0.29	41.42		94.56	0.66	63.98
	88.79	0.3	37.49		82.61	0.69	65.99
	87.7	0.32	42.69		86.23	0.74	63.48
	89.8	0.33	35.15		87.17	0.65	61.61
	94.43	0.342	43.65		91.86	0.68	64.13
	91.95	0.32	34.51		89.67	0.74	57.42
	93.51	0.282	43.64		92.05	0.62	66.86
	90.15	0.342	42.22		89.79	0.66	60.71
	91.15	0.282	32.62		94.97	0.66	61.71
	91.97	0.35	38.1		87.34	0.72	66.53
	80.08	0.302	33.93		86.53	0.66	59.98
	92.99	0.292	42.46		92.5	0.68	58.57
	89.87	0.28	35.28		88.81	0.71	62.24
	85.08	0.32	35.04		86.63	0.71	58.19
	87.25	0.35	36.87		91.21	0.71	61.78
	86.83	0.3	35.18		83.84	0.73	60.46
	91.72	0.302	37.17		91.07	0.73	59.71
	90.96	0.302	41.69		84.16	0.71	64.74
	82.15	0.332	38.45		83.02	0.73	56.61
	85.62	0.3	37.38		86.33	0.7	64.43
	83.91	0.312	34.2		82.25	0.65	58.64
	90.92	0.332	34.3		83.6	0.69	64.01
	86.06	0.31	39.68		89.52	0.75	55.96
	84.32	0.34	32.35		92.65	0.72	61.45
	82.4	0.292	38.87		92.65	0.68	60.84
	94.65	0.33	37.62		87.44	0.71	56.01
	88.28	0.292	41.33		89.05	0.67	59.83
	87.68	0.322	36.9		83.4	0.72	57.04
	84.44	0.28	41.37		91.72	0.69	55.24
	90.56	0.31	42.77		92.1	0.74	57.81
	94.42	0.312	36.97		94.84	0.69	60.66
	94.36	0.322	42.49		89.16	0.65	64.11
	93.87	0.29	40.47		89.09	0.66	61.4
	90.45	0.302	37.95		94	0.74	62.18
	86.35	0.322	34.45		91.56	0.67	62.86
	89.14	0.302	39.08		85.32	0.64	66.11
	90.92	0.34	41.88		84.27	0.64	57.36
	86.05	0.29	40.45		87.71	0.73	62.33
	87.79	0.34	33.13		86.73	0.75	57.17
	80.53	0.282	41.02		92.51	0.74	57.06
	92.28	0.332	40.18		87.55	0.73	62.66
	81.68	0.33	40.08		88.69	0.69	56.91
	87.97	0.33	32.87		90.87	0.66	56.47
	89.13	0.34	38.62		84.72	0.69	56.84
	92.06	0.29	39.25		90.15	0.69	61.44
	83.3	0.29	42.75		90.32	0.66	65.19
	91.9	0.292	34.38		94.83	0.65	61.6
	92.15	0.312	42.52		93.13	0.74	66.51
	91.85	0.34	36.64		83.88	0.73	57.99
	86.52	0.32	33.73		91.05	0.74	59.95
	85.29	0.282	40.73		93.8	0.63	60.39
	82.01	0.272	37.09		89.3	0.68	66.11
	94.28	0.302	37.47		84.6	0.64	63.29
	86.61	0.282	32.31		91.95	0.72	66.14
	93.1	0.31	33.04		87.01	0.64	63.41
	83.33	0.33	41.71		84.53	0.67	63.34
	82.24	0.292	34.93		83.98	0.74	61.21
	80.6	0.3	32.73		91.98	0.63	64.35
	81.84	0.35	42.94		87.06	0.73	65.33
	81.02	0.3	32.4		94.36	0.73	64.59
	82.47	0.32	37.4		87.69	0.74	60.61
	89.72	0.332	43.67		87.59	0.71	64.89
	85.02	0.302	33.47		92.43	0.72	61.52
	83.75	0.32	38.13		82.24	0.65	65.78
	86.24	0.32	32.18		87.87	0.7	66.86
	90.36	0.32	39.19		91.02	0.63	59.76
	93.78	0.312	32.92		86.99	0.63	62.94
	82.02	0.32	43.81		93.53	0.72	59.7
	91.4	0.34	36.63		90.28	0.73	66.93
	85.68	0.35	32.89		93.72	0.64	61.9
	85.47	0.28	37.79		92.33	0.68	64.27
	80.89	0.302	39.64		86.03	0.69	60.28
	87.82	0.302	41.21		93.64	0.7	56.16
	87.97	0.31	38.59		91.87	0.69	57.52
	89.54	0.32	37.17		88.5	0.75	61.74
	86.1	0.28	41.44		91.8	0.73	56.5
	89.76	0.29	36.95		94.23	0.68	60.65
	87.11	0.282	36.19		91.97	0.7	62.1
	89.43	0.282	34.96		91.64	0.66	56.19
	82.33	0.322	40.12		86.82	0.64	64.92
	89.73	0.282	36.94		92.34	0.7	65.94
	85.76	0.332	36.61		84.37	0.63	66.08
	86.17	0.34	42.62		93.49	0.68	57.43
	82.05	0.302	39.75		83.12	0.69	60.17
	82.23	0.342	37.19		82.61	0.65	57.75
	86.47	0.32	32.12		82.91	0.63	62.39
	85.27	0.28	33.72		93.24	0.72	66.04
	93.25	0.31	40.65		92.2	0.7	56.48
	86.26	0.332	35.65		83.78	0.72	61.51
	90.46	0.31	32.48		91.01	0.64	63.72
	93.03	0.342	36.61		86.44	0.74	66.43
	81.79	0.302	38.14		93.28	0.63	58.62
	80.72	0.312	34.63		86.13	0.63	64.91
	82.87	0.29	38.17		94.05	0.68	57.73
	81.43	0.35	37.2		94.79	0.63	61.11
	89.23	0.28	32.49		94.47	0.69	57.26
	80.9	0.272	34.03		91.94	0.66	61.37
	80.52	0.31	40.17		82.93	0.71	60.77
	86.04	0.282	40.26		90.58	0.66	57.01
	89.13	0.282	35.07		82.72	0.66	62.01
	80.99	0.292	38.85		85.28	0.73	64.57
	85.81	0.312	40.72		85.07	0.63	59
	92.76	0.32	43.11		92.56	0.72	56.89
	82.18	0.342	36.36		94.46	0.69	63.69
	83.8	0.282	41.61		86.95	0.69	58.61
	85	0.292	43.36		86.92	0.72	65.96
	86.72	0.332	39.43		90.25	0.74	56.15
	90.43	0.28	33.7		83.02	0.7	64.75
	91.67	0.29	41.46		84.84	0.65	55.26
	88.36	0.322	42.36		82.76	0.66	64.5
	94.59	0.32	34.89		92.75	0.66	57.19
	84.49	0.34	37.02		85.97	0.72	64.94
	91.65	0.292	32.69		88.89	0.66	57.72
	91.56	0.32	40.96		84.87	0.68	65.18
	80.69	0.322	41.49		90.49	0.73	65.27
	84.2	0.302	39.39		86.89	0.7	57.09
	94.51	0.32	35.98		85.61	0.65	57.36
	92.98	0.35	32.44		93.73	0.65	55.97
	81.07	0.342	36.64		88.94	0.75	64.7
	90.77	0.302	34.13		92.67	0.7	55.74
	81.62	0.3	33.41		86.07	0.72	62.51
	91.83	0.332	34.64		93.37	0.66	56.57
	88.28	0.292	39.46		92.19	0.72	60.08
	92.23	0.3	37.53		94.59	0.65	61.83
	88.39	0.28	42.89		85.12	0.73	61.48
	88.75	0.34	32.07		82.62	0.71	59.76
	84.08	0.342	39.15		88.58	0.69	56.65
	91.19	0.28	40.18		86.02	0.64	56.1
	81.53	0.31	37.32		94.5	0.69	65.91
	82.07	0.342	41.05		92.4	0.64	64.35
	91.79	0.3	32.65		85.32	0.68	57.56
	93.02	0.292	38.39		94.54	0.72	59.52
	94.91	0.33	37.85		89.63	0.64	58.43
	85.39	0.292	38.08		90.31	0.65	56.96
	89.99	0.332	34.74		89.43	0.72	58.73
	87.49	0.332	41.47		84.32	0.72	63.43
	92.06	0.282	34.25		93.91	0.74	57.66
	84.4	0.322	38.93		92.17	0.71	64.65
	89.14	0.342	34.54		93.28	0.69	64.55
	91.54	0.322	38.68		87.01	0.74	63.6
	91.32	0.312	39.56		90.78	0.74	59.28
	84.6	0.332	37.3		92.43	0.69	58.45
	80.56	0.3	36.88		88.77	0.67	59.67
	79.81	0.32	39.91		84.5	0.65	65.23
	91.89	0.28	41.23		86.26	0.65	66.55
	93.9	0.272	34.54		86.71	0.69	60.24
	93.75	0.322	36.79		91.06	0.7	56.33
	93.77	0.282	37.53		85.71	0.7	63.08
	84.36	0.282	35.99		88.11	0.66	56.08
	85.41	0.32	33.44		90.43	0.67	55.82
	87.1	0.302	38.69		91.05	0.65	61.23
	91.88	0.3	32.76		88.03	0.72	61
	89.18	0.322	34.41		90.63	0.64	58.35
	86.76	0.28	32.11		94.98	0.63	55.14
	85.99	0.322	34.86		94.37	0.7	60.71
	86.57	0.32	39.43		86.09	0.73	66.06
	92.52	0.33	40.16		88.56	0.64	58.41
	94.05	0.302	32.09		87.83	0.7	61.4
	81.46	0.292	36.48		94.65	0.68	64.66
	93.26	0.312	42.78		92.74	0.66	64.39
	94.28	0.292	35.29		94.28	0.64	56.64
	89.08	0.322	38.77		92.24	0.72	63.31
	91.46	0.322	43.41		84.92	0.65	63.24
	86.67	0.342	32.96		93.17	0.65	63.79
	84.05	0.29	37.6		90.04	0.73	65.84
	88.76	0.272	35.83		83.91	0.75	56.48
	92.26	0.272	38.27		82.35	0.7	57.67
	82.44	0.35	33.85		86.39	0.63	61.43
	93.03	0.312	42.9		82.94	0.64	56.05
	79.84	0.34	41.27		84.76	0.67	55.09
	93.23	0.332	42.94		90.31	0.69	57.86
	83.19	0.34	39.53		83.17	0.69	57.66
	87.79	0.342	35.92		91.41	0.64	63.05
	91.35	0.332	35.24		93.4	0.73	61.91
	81.73	0.32	33.03		85.44	0.73	56.54
	89.44	0.332	42.01		93	0.72	59.13
	82.87	0.34	33.51		85.59	0.65	57.75
	82.56	0.28	41.65		92.55	0.66	58.37
	88.13	0.312	38.46		94.47	0.65	59.2
	91.83	0.3	32.87		94.23	0.64	64.18
	80.87	0.342	37.12		91.33	0.69	59.75
	87.13	0.282	39.88		90.76	0.68	58.89
	80.92	0.32	35.56		94.27	0.65	56.71
	82.94	0.312	43.52		93.69	0.63	55.82
	88.24	0.29	34.55		89.75	0.74	57.89
	93.38	0.3	40.27		92.37	0.71	57.29
	83.83	0.322	34.51		88.3	0.65	58.94
	80.53	0.312	35.11		82.28	0.74	56.56
	80.88	0.312	39		84.03	0.74	56.2
	82.55	0.342	39.04		88.09	0.63	64.18
	81.11	0.282	34.46		83.15	0.64	63.09
	94.82	0.332	37.86		82.59	0.74	55.53
	90.02	0.32	38.82		90.04	0.65	65.64
	88.59	0.32	43.91		86.55	0.74	60.82
	86.71	0.32	38.21		87.47	0.65	55.94
	93.98	0.28	43.18		94.22	0.65	57.1
	92.55	0.3	40.66		89.76	0.71	56.4
	89.08	0.29	35.12		86.39	0.69	58.71
	85.03	0.32	34.05		94.4	0.69	65.71
	88.44	0.332	38.49		89.66	0.72	60.65
	86.82	0.34	37.01		89.97	0.64	57.28
	79.88	0.322	41.36		93.81	0.68	62.13
	87.04	0.292	36.84		89.46	0.71	57.18
	87.68	0.282	39.81		91.8	0.74	57.91
	91.81	0.282	35.66		86.36	0.66	64.75
	89.38	0.32	36.71		82.93	0.74	58.62
	80.07	0.32	42.52		86.06	0.62	61.9
	82.9	0.28	39.08		86.96	0.73	59.12
	94.4	0.342	37.97		82.53	0.73	58.86
	81.01	0.312	38.89		85.82	0.7	64.11
	81.17	0.342	36.74		89.08	0.74	55.52
	80.79	0.3	37.14		89.55	0.63	62.71
	93.07	0.272	40.3		86.18	0.63	60.63
	91.13	0.3	35.94		89.76	0.71	60.6
	84.4	0.34	36.48		94.21	0.73	64.65
	91.99	0.3	36.37		83.49	0.71	66.1
	86.58	0.272	43.27		89.26	0.72	64.71
	84.73	0.332	39.89		86.95	0.66	60.16
	87.17	0.272	43.4		90.8	0.69	66.82
	89.52	0.34	37.21		86.04	0.63	58.39
	81.85	0.322	38.15		94.13	0.67	61.83
	93.72	0.342	33.1		87.18	0.63	58.68
	81.12	0.322	40.1		85.23	0.73	62.93
	85.24	0.282	42.63		83.29	0.68	58.22
	85.2	0.3	41.23		93.73	0.65	59.95
	90.07	0.272	34.02		93	0.71	65.44
	93.68	0.3	42.55		86.9	0.67	66.12
	91.86	0.34	40.92		88.33	0.72	62.25
	79.82	0.342	43.89		87.08	0.63	56.51
	93.32	0.292	37.61		89.39	0.74	56.14
	83.33	0.3	33.81		91.66	0.73	61.22
	87.48	0.342	41.42		89.81	0.74	64.16
	86.85	0.322	38.23		91.99	0.67	56.54
	82.42	0.31	32.47		84.54	0.71	65.27
	86.5	0.29	32.72		82.67	0.73	57.22
	92.88	0.342	32.08		92.44	0.69	63.53
	89.37	0.322	43.68		84.91	0.71	62.53
	94.92	0.29	40.15		89.21	0.72	65.96
	86.71	0.312	41.98		94	0.63	55.03
	81.67	0.3	34.91		89.34	0.71	58.63
	89.12	0.3	41.2		83.91	0.63	56.73
	82.64	0.272	38.6		85.7	0.7	63.97
	87.27	0.322	34.99		94.12	0.67	58.52
	86.64	0.292	39.82		89.08	0.63	63.79
	82.61	0.342	34.63		88.84	0.66	60.49
	80.22	0.32	36.94		94.99	0.73	56.78
	83.6	0.33	40.62		91.43	0.73	62.76
	85.02	0.322	32.32		87.47	0.66	57.56
	80.79	0.3	42.91		91.9	0.67	65.47
	80.47	0.292	42.97		86.57	0.68	58.33
	86.59	0.34	32.02		90.59	0.71	63.98
	84.12	0.33	42.57		83.55	0.66	57.55
	87.33	0.332	32.86		85.25	0.65	66.56
	84	0.302	37.86		87.74	0.69	56
	85.73	0.322	39.59		91.28	0.65	55.09
	89.89	0.29	32.25		92.92	0.64	61.57
	80.92	0.28	37.79		88.71	0.75	55.49
	92.07	0.31	33.73		87.5	0.63	59.35
	94.98	0.322	35.04		89.8	0.73	57.69
	84.25	0.34	35.01		83.28	0.71	55.65
	86.05	0.35	41.67		85.94	0.72	63.86
	94.69	0.322	35.38		91.61	0.66	60.57
	82.66	0.332	40.17		93.47	0.73	62.4
	92.83	0.342	32.29		86.6	0.66	61.53
	82.16	0.312	32.8		90.98	0.63	58.47
	90.92	0.31	42.59		86.56	0.74	58.5
	89.65	0.312	35.52		94.3	0.71	65.33
	83.85	0.3	39.07		87.82	0.74	65
	93	0.292	43.96		86.01	0.7	56.05
	82.45	0.302	35.57		82.36	0.72	66.87
	83.37	0.322	36.16		92.77	0.65	64.66
	91.6	0.32	33.6		89.69	0.68	58.37
	84.3	0.31	42.99		91.78	0.74	57.28
	94.02	0.312	37.17		94.46	0.66	55.49
	86.05	0.32	34.18		90.12	0.63	60.72
	80.43	0.342	42.1		86.81	0.71	58.48
	92.51	0.312	39.47		88.85	0.66	59.62
	80.44	0.34	41.83		89.18	0.74	66.4
	88.38	0.35	43.79		91.27	0.68	62.43
	81.36	0.272	36.51		82.76	0.64	64.54
	85.37	0.31	39.98		91.41	0.64	62.02
	92.3	0.32	37.8		91.47	0.69	63.92
	92.91	0.302	41.15		94.7	0.71	65
	89.89	0.312	35.93		85.04	0.71	60.32
	92.01	0.3	41.52		90.91	0.64	58.55
	94.2	0.312	34.38		94.58	0.66	64.03
	80.85	0.28	32.48		87.96	0.7	59.33
	93.34	0.302	43		87.39	0.64	63.21
	83.01	0.302	36.6		94.44	0.66	62.8
	88.31	0.332	40.78		85.09	0.72	58.38
	84.29	0.31	37.86		91.1	0.73	58.28
	81.12	0.34	38.52		82.24	0.65	65.86
	92.49	0.31	38.14		84.71	0.62	55.99
	88.01	0.28	34.97		82.64	0.62	60.47
	89.77	0.332	35.54		88.34	0.67	62.17
	89.18	0.322	42.87		88.2	0.66	66.69
	92.5	0.292	38.88		87.63	0.66	56.37
	94.38	0.33	39.06		84.64	0.74	63.63
	92.31	0.332	41.78		83.06	0.73	66.93
	88.03	0.332	34.76		87.86	0.63	62.07
	92.53	0.28	40.9		92.08	0.69	57.97
	86.57	0.28	33.06		89.46	0.7	59.15
	80.27	0.322	42.71		87.72	0.66	66.19
	83.78	0.34	43.32		90.13	0.67	56.63
	91.7	0.322	42.7		93.67	0.65	62.52
	88.8	0.322	42.83		88.98	0.69	59.83
	87.07	0.282	33.79		90.93	0.74	64.01
	81.9	0.33	34.8		84.65	0.7	66.68
	94.42	0.29	36		83.4	0.63	63.62
	93.53	0.332	39.31		92.19	0.69	65.37
	87.69	0.302	34.1		82.86	0.65	66.83
	90.97	0.322	38.14		85.91	0.66	55.38
	80.42	0.342	40.02		84.24	0.73	56.02
	91.78	0.3	37.5		91.03	0.72	55.84
	82.22	0.3	42.07		88.89	0.68	63.91
	87.22	0.292	36.14		84.38	0.67	60.04
	81.17	0.31	44		94.98	0.68	56.99
	87.11	0.312	43.31		88.87	0.7	60.56
	82.59	0.312	38.22		82.37	0.63	57.99
	81.03	0.33	34.37		94.93	0.75	59.74
	87.93	0.282	42.76		84.47	0.65	59.3
	82.32	0.322	37.17		87.67	0.7	62.3
	82.68	0.272	32.18		91.83	0.64	62.42
	84.65	0.35	35		89.54	0.64	57.48
	93.14	0.302	38.69		91.75	0.63	56.05
	87.53	0.29	42.83		84.17	0.65	63.74
	91.25	0.33	40.34		90.79	0.73	66.66
	81.81	0.322	35.12		86.26	0.66	64.71
	80.42	0.312	39.22		83.58	0.62	66.6
	93.76	0.31	32.41		90.42	0.64	56.96
	83.66	0.322	42.06		84.05	0.67	63.19
	87.89	0.292	38.01		94.51	0.68	55.93
	89.01	0.28	39.03		83.27	0.66	63.32
	84.62	0.33	38.39		90.67	0.66	56.65
	85.03	0.302	34.05		92.07	0.7	59.25
	83.84	0.312	42.52		84.44	0.71	63.77
	83.65	0.33	37.77		91.83	0.63	66.52
	88.82	0.272	32.24		85.33	0.74	66.82
	90.48	0.312	43.36		93.58	0.73	64.72
	92.58	0.31	32.06		92.48	0.66	56.98
	88.36	0.35	39.34		91.12	0.65	55.58
	90.26	0.33	43.51		94	0.74	63.19
	83.04	0.31	42.39		84.61	0.65	56.19
	83.42	0.3	43.69		91.13	0.73	57.97
	83.94	0.332	38.34		89.66	0.69	65.19
	87.63	0.31	37.78		92.17	0.72	61.18
	87.82	0.332	42.05		88.33	0.72	65.27
	84.28	0.35	32.89		92.07	0.63	61.19
	94.05	0.31	42.62		87.58	0.71	56.29
	87.08	0.34	32.73		91.72	0.74	57.32
	84.44	0.34	39.51		86.46	0.68	64.01
	93.58	0.282	34.75		84.39	0.72	63.59
	93.73	0.34	43.43		82.55	0.72	62.59
	83.59	0.332	35.46		92.13	0.63	56.33
	83.94	0.272	38.26		86.08	0.64	63.54
	80.08	0.322	34.81		91.36	0.67	55.14
	90.87	0.282	34.16		84.01	0.72	56.81
	88.57	0.302	41.97		86.6	0.67	65.5
	92.08	0.3	38.88		94.15	0.69	56.38
	90.11	0.29	34.66		83.66	0.75	58.3
	90.37	0.34	33.01		89.47	0.68	60.79
	94.59	0.282	34.24		91.98	0.65	59.7
	94.59	0.312	36.29		91.47	0.64	56.13
	79.83	0.3	37.29		83.72	0.63	65.24
	90.43	0.282	33.65		87.66	0.73	65.95
	93.5	0.29	35.39		90.16	0.68	63.29
	94.78	0.312	42.25		90.02	0.71	65.96
	92.54	0.31	36.47		86.76	0.71	62.67
	83.29	0.3	38.29		87.77	0.65	55.67
	87.14	0.292	43.56		91.65	0.64	61.25
	85.81	0.29	34.03		85.54	0.64	57.98
	91.49	0.332	35.34		94.18	0.74	64.11
	88.45	0.3	42.77		87.73	0.75	61.3
	94.71	0.32	36.74		86.74	0.72	57.15
	84.6	0.32	38.45		88.02	0.64	65.61
	93.51	0.33	37.68		88.8	0.75	58.29
	92.01	0.312	32.72		88.51	0.66	63.89
	88.09	0.28	39.02		91.39	0.75	57.39
	86.21	0.342	35.7		91.83	0.66	55.87
	86.75	0.29	33.99		84.39	0.69	63.69
	87.49	0.322	41.09		85.74	0.67	63.24
	84.43	0.32	32.45		90.87	0.65	56.39
	92.23	0.3	37.31		83.71	0.73	63.91
	90.7	0.31	40.61		94.97	0.71	63.87
	87.48	0.32	34.88		84.06	0.74	60.43
	90.24	0.292	33.09		89.27	0.71	62.68
	84.07	0.3	33.99		91.23	0.73	55.87
	90.66	0.32	35.87		86.64	0.67	62.38
	82.13	0.292	37.69		85.93	0.66	61.13
	83.1	0.28	36.1		94.81	0.68	63.82
	82.95	0.312	34.25		84.96	0.73	60.71
	94.27	0.272	32.11		88.15	0.66	63.29
	87.39	0.28	33.27		87.99	0.7	65.82
	93.35	0.322	37.2		83.53	0.73	59.31
	88.59	0.312	35.46		93.67	0.65	61.32
	88.23	0.29	41.05		84.98	0.69	57.3
	82.86	0.34	33.16		86.29	0.73	60.9
	81.21	0.32	42.61		87.16	0.67	58.19
	93.38	0.332	40.55		88.07	0.73	61.04
	86.69	0.32	35.05		82.68	0.73	65.96
	87.51	0.332	39.65		89.31	0.62	55.67
	84.24	0.34	41.54		86.88	0.65	63.73
	82.4	0.322	43.61		87.54	0.63	57.94
	92.53	0.3	36.83		84.04	0.72	59.75
	88.21	0.29	38.72		85.41	0.66	63.96
	84.11	0.31	39.6		84.29	0.63	61.13
	93.42	0.312	42.93		82.64	0.68	55.37
	86.34	0.32	41.82		85.31	0.64	65.53
	88.51	0.29	43.1		83.82	0.68	63.05
	81.81	0.31	32.67		89.05	0.74	66.84
	83.92	0.322	41.26		88.32	0.74	59.37
	91.88	0.282	41.91		92.86	0.66	66.29
	81.69	0.3	43.35		90.74	0.62	60.42
	88.63	0.282	34.53		91.96	0.66	64.19
	81.97	0.312	32.55		86.68	0.65	66.37
	84.95	0.35	34.43		86.72	0.69	62.84
	82.66	0.332	38.05		85.18	0.63	56.09
	82.69	0.3	35.51		85.26	0.73	65
	91.85	0.35	41.2		86.39	0.62	64.56
	82.17	0.3	41.61		90.09	0.66	60.48
	84.62	0.29	38.74		86.29	0.71	57.3
	92.04	0.342	38.04		94.73	0.7	66.51
	89.31	0.3	40.15		86.25	0.73	57.97
	85.98	0.31	37.22		91.2	0.63	65.47
	86.95	0.35	42.85		88.87	0.74	58.82
	92.71	0.342	33.51		84.21	0.74	65.99
	93.81	0.35	34.32		94.34	0.72	59.03
	80.09	0.312	38.57		94.96	0.67	59.31
	94.63	0.282	37.77		83.87	0.7	63.31
	80.16	0.29	42.94		87.58	0.71	60.87
	91.56	0.31	33.45		90.95	0.72	63.52
	80.08	0.322	42.25		87.45	0.74	60.26
	84.82	0.3	43.88		88.26	0.74	64.74
	79.99	0.35	36.27		93.04	0.66	57.01
	83.91	0.332	39.66		87.62	0.69	59.14
	84.43	0.34	36.51		94.31	0.72	63.18
	92.65	0.33	40.2		87.6	0.68	64.78
	84.87	0.29	39.25		87.08	0.7	63.97
	92.17	0.322	39.66		90.54	0.64	63.97
	88.7	0.292	41.43		82.98	0.65	61.88
	87.03	0.3	37.78		94.12	0.73	60.29
	82.88	0.32	43.67		92.16	0.7	61.98
	90.35	0.332	38.65		89.25	0.64	57.5
	83.32	0.282	36.21		94.68	0.67	64.41
	88.19	0.282	36.88		92.74	0.74	56.09
	94.31	0.342	43.59		90.53	0.67	59.58
	84.03	0.29	41.57		92.9	0.68	66.78
	80.5	0.34	39.13		89.91	0.65	56.59
	87.55	0.322	33.72		89.99	0.64	64.58
	82.27	0.322	41.96		82.74	0.74	56.71
	84.96	0.28	42.27		87.72	0.71	62.67
	88.98	0.332	35.84		90.64	0.74	60.4
	90.51	0.34	36.31		86.51	0.67	60.37
	85.26	0.33	33.88		95	0.66	63.02
	83.79	0.33	37.6		87.95	0.66	60.01
	83.93	0.302	32.39		89.05	0.63	56.01
	85.15	0.272	38.14		92.75	0.66	63.09
	92.91	0.292	34.69		84.49	0.64	65.71
	84.03	0.332	41.36		92.31	0.69	55.22
	93.31	0.342	34.55		91.84	0.73	65.64
	82.1	0.33	43.1		84.05	0.69	57.46
	80.21	0.29	32.6		87.55	0.74	62.72
	88.71	0.282	37.23		94.4	0.64	60.16
	90.11	0.292	39.68		92.1	0.65	66.29
	81.16	0.32	40.5		82.29	0.67	65.39
	85.43	0.292	36.05		92.02	0.73	64.2
	84.27	0.282	39.24		92.72	0.73	65.08
	88.77	0.31	39.75		88.43	0.65	59.1
	82.84	0.35	41		92.62	0.74	58.33
	94.73	0.29	42.51		86.74	0.7	55.03
	94.34	0.332	32.32		83.57	0.64	62.13
	94.35	0.342	32.22		89.13	0.72	63.7
	94.58	0.302	37.12		89.75	0.67	56.23
	92.68	0.342	38.8		85.46	0.69	57.98
	94.72	0.292	43.59		84.35	0.69	63.14
	82.75	0.31	32.32		93.33	0.72	63.35
	80.4	0.342	41.95		92.79	0.63	57.27
	92.63	0.312	43.18		90.68	0.72	63.33
	84.25	0.3	36.7		89.63	0.7	63.18
	83.61	0.332	33.04		88.91	0.65	56.58
	94.79	0.312	32.27		87.99	0.66	63.69
	81.24	0.342	37.55		91.33	0.7	56.38
	88.69	0.322	35.76		92.95	0.72	64.53
	83.56	0.272	35.1		85.28	0.66	57.78
	85.34	0.332	34.96		88.81	0.71	64.58
	86.51	0.31	43.83		86.22	0.66	61.86
	81.96	0.28	37.28		92.02	0.64	64.6
	81.75	0.322	41.94		89.05	0.67	56
	89.9	0.322	41.8		90.55	0.68	66.96
	94.28	0.3	34.42		94.02	0.67	61.16
	86.17	0.332	36.18		89.6	0.63	61.49
	87.12	0.34	41.89		89.44	0.72	59.17
	92.29	0.322	35.15		83.57	0.75	61.34
	86.21	0.35	40.39		83.51	0.68	65.85
	81.08	0.34	39.66		92.73	0.69	63.19
	92.76	0.33	39.87		86.82	0.72	57.44
	79.88	0.332	41.47		83.85	0.69	63.37
	81.17	0.31	40.89		85.88	0.69	55.21
	89.19	0.332	33.06		88.56	0.71	66.39
	82.5	0.332	43.4		93.47	0.62	64.2
	85.04	0.302	39.4		93.51	0.67	56.68
	87.72	0.282	35.86		89.62	0.63	65.32
	93.79	0.322	37.46		91.6	0.73	55.19
	91.82	0.322	41.9		92.44	0.66	56.7
	85.73	0.282	40.42		90.84	0.66	65.25
	86.33	0.332	41.46		91.21	0.66	60.87
	83.07	0.29	32.77		83.72	0.7	62.23
	85.18	0.272	39.62		82.55	0.7	63.51
	82.31	0.29	42.56		90.25	0.68	60.86
	87.83	0.312	39.52		89.3	0.65	56.26
	93.81	0.29	32.15		82.47	0.66	66.62
	82.38	0.32	33.18		90.47	0.71	65.8
	86.02	0.33	37.75		93.42	0.67	63.08
	91.57	0.29	35.65		88.17	0.71	63.67
	83.47	0.332	42.84		94.61	0.7	60.65
	89.93	0.29	43.24		83.87	0.64	56.82
	82.7	0.34	40.36		85.77	0.67	60.51
	85.55	0.28	36.67		89.14	0.73	62.24
	87.66	0.34	43.2		94.07	0.74	63.21
	88.4	0.292	37		89.32	0.7	65.26
	85.68	0.3	40.61		91.22	0.73	65.03
	89.81	0.312	40.9		84.15	0.68	66.23
	85.59	0.29	36.65		82.89	0.67	62.38
	94.02	0.332	41.24		85.94	0.65	63.29
	84.76	0.29	40.95		88.62	0.7	55.72
	80.3	0.312	40.38		87.7	0.74	65.43
	91.05	0.34	33.14		94.53	0.71	56.53
	91.19	0.302	32.14		88.12	0.67	66.93
	82.57	0.332	39.13		90.21	0.63	63.14
	81.39	0.342	33.5		82.88	0.72	66.5
	88.54	0.3	35.96		93.83	0.69	60.75
	90.36	0.32	36.49		85.19	0.67	65.53
	90.57	0.29	42.59		91.45	0.66	64.02
	87.18	0.34	41.96		94.31	0.65	62.17
	86.66	0.292	40.82		85.12	0.73	59.86
	93.08	0.33	32.99		91.77	0.63	57.84
	90.34	0.322	35.87		91.3	0.63	57.23
	80.43	0.342	32.59		85.09	0.7	55.38
	88.81	0.322	35.23		87.65	0.7	62.36
	94.17	0.342	34.92		87.09	0.7	62.8
	87.25	0.292	33.88		89.81	0.67	62.76
	80.52	0.3	32.61		90.02	0.71	66.82
	80.63	0.322	36.05		85.03	0.68	58.67
	79.82	0.33	38.23		85.75	0.71	57.94
	82.57	0.3	41.46		91.64	0.74	59.18
	84.12	0.282	41.8		94.94	0.7	63.55
	90.11	0.332	42.92		86.06	0.67	62.08
	82.09	0.312	37		88.49	0.64	58.51
	94.24	0.292	40.09		91.35	0.74	58.77
	87.44	0.28	42.5		88.64	0.64	60.06
	94.1	0.33	41.6		92.96	0.73	63.12
	86.22	0.28	40.84		83.18	0.64	61.41
	87.19	0.332	39.44		87.12	0.69	58.71
	92.46	0.292	43.21		88.52	0.72	55.78
	92.94	0.32	33.07		86.93	0.69	60.4
	80.34	0.282	32.42		94.77	0.63	62.43
	81.23	0.33	38.26		86.23	0.72	61.78
	88.64	0.28	38.6		84.82	0.69	55.44
	85.15	0.35	41.91		94.51	0.67	55.6
	89.15	0.292	37.69		86.35	0.74	59.59
	80.55	0.35	34.29		82.68	0.63	59.58
	90.89	0.322	40.63		87.15	0.73	63.65
	91.51	0.31	33.04		84.87	0.72	62.47
	83.88	0.302	35		85.27	0.71	55.55
	90.11	0.29	40.04		82.76	0.63	63.66
	87.57	0.33	40.98		94.73	0.74	59.61
	85.88	0.302	43.34		83.13	0.63	55.3
	83.74	0.33	37.46		90.59	0.71	66.59
	82.72	0.342	34.86		93.16	0.68	59.41
	93.95	0.3	42.85		84.07	0.66	55.87
	84.71	0.28	33.89		87.41	0.66	57.53
	85.17	0.282	41.11		88.06	0.66	61.77
	91.93	0.312	36.67		94.8	0.65	66.67
	93.23	0.302	42.55		93.29	0.67	56.6
	89.39	0.31	42.78		93.53	0.69	66.7
	83.5	0.32	33.75		87.89	0.72	55.99
	87.07	0.312	42.12		86.08	0.68	59.51
	90.59	0.3	34.98		89.29	0.64	61.44
	80.29	0.29	34.66		86.14	0.64	62.46
	94.7	0.34	36.9		91.16	0.71	55.17
	84.3	0.322	37.91		86.54	0.67	63.35
	86.93	0.31	39.17		90.38	0.7	64.46
	90.03	0.33	43.7		94.38	0.73	62.57
	81.8	0.292	36.05		85.14	0.64	66.14
	83.2	0.312	32.14		82.65	0.67	55.28
	81.39	0.35	36.39		83.96	0.64	64.1
	89.53	0.29	39.5		93.19	0.65	60.57
	89.64	0.35	41.61		84.57	0.65	60.51
	91.52	0.342	43.52		86.57	0.73	62.09
	82.34	0.322	35.36		91.52	0.69	60.78
	84.68	0.29	34.73		83.2	0.69	58.12
	84.47	0.32	43.58		93.55	0.67	64.59
	94.31	0.34	32.09		86.74	0.72	56.47
	80.25	0.332	40.18		88.02	0.73	61.47
	89.2	0.31	40.2		83.42	0.65	60.28
	80.26	0.282	43.25		93.38	0.72	57.82
	86.93	0.332	34.28		94.91	0.62	57.13
	92.79	0.322	38.6		89.56	0.62	55.73
	90.83	0.322	39.09		94.05	0.74	57.65
	94.98	0.322	36.27		94.87	0.7	66.45
	88.92	0.33	43.28		94.71	0.66	65.67
	81.46	0.312	38.31		85.8	0.65	59.15
	92.16	0.292	36.82		85.36	0.74	58.51
	85.47	0.282	39.84		92.45	0.66	57.41
	90.39	0.33	34.23		82.26	0.72	63.05
	84.3	0.292	32.45		84.1	0.72	56.95
	93.81	0.31	41.31		89.23	0.75	55.39
	90.57	0.332	40.98		90.27	0.64	66.53
	93.26	0.31	32		84.98	0.65	59.47
	89.52	0.332	34.79		84.57	0.74	66.97
	89.19	0.322	32.1		88.51	0.73	55.32
	89.19	0.302	34.23		86.31	0.62	64.1
	83.35	0.32	34.48		82.59	0.64	56.07
	83.48	0.29	34.69		84.74	0.69	62.81
	92.08	0.35	36.41		90.2	0.69	60.2
	88.55	0.33	32.01		82.92	0.66	58.98
	92.35	0.29	33.59		82.51	0.72	60.49
	80.71	0.312	41.64		87.71	0.71	60.19
	93.64	0.28	39.03		87.76	0.63	64.22
	85.61	0.35	36.3		92.31	0.64	58.36
	80.78	0.28	39.52		86.2	0.67	66.23
	81.77	0.29	42.1		82.69	0.72	58.33
	80.79	0.28	42.26		88.6	0.67	66.45
	80.4	0.28	43.95		92.59	0.65	56.43
	87.81	0.292	43.28		92.85	0.71	62.93
	91.68	0.282	41.87		87.39	0.64	57.69
	87.15	0.29	42.23		86.2	0.69	62.86
	86.12	0.312	38.43		84.14	0.66	61.82
	86.93	0.32	38.31		90.43	0.67	55.4
	89.84	0.29	40.92		89.58	0.66	58.31
	90.89	0.302	32.31		83.17	0.75	59.2
	85.79	0.302	42.85		94.02	0.64	64.19
	89.47	0.32	43.27		85.75	0.74	63.03
	89.33	0.322	41.2		90.85	0.63	62.92
	86.99	0.32	34.69		92.59	0.68	61.69
	83.51	0.322	39.25		91.16	0.67	64.59
	80.17	0.3	33.66		82.21	0.66	58.13
	86.61	0.342	39.86		89.95	0.71	66.43
	86.77	0.34	32.67		87.57	0.69	55.96
	88.37	0.322	38.42		88.63	0.73	65.95
	81.47	0.28	34.09		83.25	0.73	59.32
	85.55	0.292	42.84		82.34	0.7	61.38
	81.72	0.32	32.09		85.26	0.72	62.89
	91.16	0.332	41.21		87.34	0.65	58.36
	84.27	0.34	39.04		94.41	0.67	65.74
	92.85	0.282	32.3		93.94	0.71	61.7
	90.62	0.292	35.74		93.87	0.64	55.73
	84.99	0.342	42.93		87.48	0.73	60.24
	82.92	0.302	34.6		83.91	0.74	61.77
	86.69	0.292	36.41		84.33	0.74	57.09
	93.6	0.31	39.07		84.71	0.72	56.36
	82.56	0.342	35.77		90.53	0.74	59.97
	87.99	0.29	35.77		94.33	0.72	55.1
	80.76	0.282	35.8		84.48	0.73	60.46
	80.85	0.342	41.09		89.75	0.64	61.37
	80.42	0.272	34.92		86.32	0.75	56
	81.47	0.272	40.46		93.39	0.64	65.67
	85.94	0.342	35.84		83.98	0.73	59.24
	86.11	0.31	41.15		82.82	0.64	56.64
	81.3	0.33	43.43		88.77	0.75	64.77
	85.16	0.302	40.91		92.93	0.62	59.22
	85.77	0.302	39.67		84.38	0.67	59.5
	80.38	0.32	43.33		93.34	0.69	66.63
	87.75	0.302	43.48		93.77	0.67	56.95
	94.49	0.33	39.81		90.59	0.74	66.72
	87.98	0.28	42.96		90.02	0.74	66.03
	91.79	0.3	37.91		89.87	0.71	57.8
	83.11	0.322	33.62		82.86	0.67	64.97
	86.99	0.31	35.4		87.48	0.69	59.98
	92.61	0.29	32.58		84.82	0.67	65.55
	84.61	0.292	34.89		85.55	0.73	55.08
	92.39	0.292	34.54		90.44	0.74	64.1
	91.73	0.3	43.19		88.52	0.67	59.27
	91.51	0.292	33.21		82.92	0.69	55.63
	92.44	0.35	42.48		90.02	0.73	58.33
	89.84	0.342	38.57		93.9	0.74	55.18
	80.9	0.3	42.16		90.68	0.65	64.14
	89.43	0.292	40.7		92.87	0.62	61.51
	84.65	0.28	34.47		85.66	0.74	65.9
	85.89	0.32	35.87		90.12	0.68	60.87
	88.08	0.3	33.69		90.11	0.66	65.2
	92.63	0.32	39.84		93.28	0.74	62.3
	86.03	0.28	40.13		87.53	0.64	66.77
	80.31	0.29	41.66		85.33	0.7	65.54
	91.54	0.34	38.78		85.49	0.7	61.1
	92.19	0.272	43.61		92.33	0.66	65.71
	88.31	0.282	36.84		84.43	0.7	59.83
	94.93	0.34	38.45		94.83	0.65	57.87
	83.57	0.28	37.99		87.98	0.69	66.27
	93.32	0.342	39.88		83.56	0.73	63.28
	87.52	0.322	33.76		94.12	0.69	61.9
	91.07	0.272	33.44		88.91	0.67	63.17
	90.25	0.3	43.63		88.77	0.72	57.46
	94.97	0.33	36.06		90.69	0.67	57.05
	80.06	0.322	41.84		88.29	0.65	66.9
	87.51	0.342	34.65		89.38	0.74	55.99
	80.08	0.342	33.38		94.27	0.67	58.42
	82.27	0.322	35.24		84.23	0.71	60.79
	86.23	0.34	39.59		85.07	0.67	61.74
	90.52	0.302	40.86		82.64	0.68	66.86
	92.27	0.302	37.04		94.22	0.66	59.27
	84.13	0.33	32.75		84.04	0.72	66.09
	86.05	0.332	35.62		93.95	0.7	66.95
	80.49	0.292	41.7		83.39	0.62	65.38
	81.51	0.33	42.95		94.69	0.73	63.58
	87.69	0.35	41		84.69	0.72	57.29
	88.68	0.302	33.03		87.76	0.68	63.35
	94.86	0.32	36.72		88.77	0.72	56.8
	94.3	0.35	32.67		89.94	0.67	55.91
	89.37	0.272	34.14		93.88	0.74	62.03
	87.75	0.292	41.22		91.79	0.73	58.15
	83.8	0.28	41.9		90.15	0.65	62.15
	83.52	0.302	34.76		83.07	0.7	63.17
	91.57	0.28	42.62		84.71	0.64	56.57
	82.43	0.342	38.39		86.32	0.63	66.55
	80.25	0.31	34.73		90.69	0.64	60.92
	90.67	0.31	37.69		90.57	0.7	65.11
	85.26	0.322	38.09		87.53	0.67	57.89
	82.69	0.322	38.99		92.77	0.64	57.76
	82.41	0.292	34.99		92.57	0.63	58.52
	86.92	0.342	43.16		87.2	0.67	56.72
	83.21	0.33	43.53		94.97	0.71	64.81
	82.88	0.34	37.5		86.05	0.67	64.18
	88.39	0.28	38.45		86.95	0.66	56.65
	87.12	0.322	33.31		84.08	0.63	57.26
	92.68	0.342	38.38		86.77	0.67	59.95
	86.49	0.29	40.33		91.99	0.71	55.07
	80.44	0.282	35.52		87.11	0.7	55.09
	87.16	0.33	42.67		87.07	0.67	60.21
	87.14	0.32	42.01		88.15	0.65	63.9
	85.26	0.322	39.99		91.88	0.66	66.1
	82.78	0.32	38.19		86.56	0.65	62.61
	94.34	0.302	36.58		88.04	0.74	65.61
	90.83	0.342	36.77		94.7	0.73	58.63
	80.25	0.292	38.22		83.48	0.71	66.06
	87.36	0.33	43.99		84.29	0.74	62.54
	92.4	0.302	41.13		90.24	0.73	57.82
	84.18	0.31	41.77		92.11	0.7	60.73
	82.9	0.35	33.59		93.25	0.66	63.93
	89.94	0.31	43.42		92.34	0.69	66.69
	81.7	0.29	37.77		89.14	0.64	61.31
	84.05	0.282	42.47		92.3	0.73	55.96
	88.88	0.34	41.33		89.94	0.73	55.56
	86.29	0.312	35.59		92.96	0.73	66.96
	81.42	0.35	34.86		90.25	0.7	57.8
	91.73	0.35	36.67		82.37	0.62	63.47
	84.35	0.3	32.69		84.45	0.72	63.08
	85.38	0.3	39.61		82.54	0.7	58.59
	87.9	0.29	38.09		90.81	0.71	57.99
	80.34	0.35	39.18		82.45	0.74	56.44
	82.14	0.302	35.46		88.8	0.74	64.33
	84.75	0.31	32.62		88.76	0.69	65.75
	80.44	0.282	35.69		93.5	0.7	58.74
	94.08	0.3	40.81		92.2	0.71	56.77
	83.14	0.28	39.17		84.2	0.68	58.42
	90.8	0.272	34.35		86.01	0.63	62.2
	91.72	0.31	32.7		94.1	0.72	62.34
	92.51	0.272	39.46		92.66	0.7	56.05
	90.41	0.33	34.26		93.95	0.64	61.87
	88.7	0.32	35.93		94.22	0.68	63.26
	83.07	0.302	34.56		84.89	0.67	64.18
	94.18	0.3	35.4		92.52	0.65	62.25
	83.81	0.342	40.01		88.33	0.7	62.13
	93.78	0.3	38.14		92.76	0.73	63.38
	81.72	0.33	32.54		89.42	0.71	61.18
	94.9	0.3	40.74		92.64	0.68	63.38
	90.09	0.34	42.97		91.89	0.65	62.23
	88.67	0.3	42.15		83.78	0.68	64.02
	85.72	0.272	38.79		83.88	0.71	57.71
	88.8	0.34	38.98		86.9	0.63	55.02
	94.56	0.34	41.25		90.22	0.65	60.65
	92.41	0.34	34.55		91.49	0.69	66.83
	88.02	0.342	40.71		87.07	0.74	64.64
	94.42	0.312	37.79		84.83	0.69	64
	92.18	0.34	40.11		84.43	0.7	60.09
	82.73	0.272	41.64		83.42	0.71	58.07
	90.63	0.29	33.39		89.97	0.75	63.29
	88.53	0.31	41.87		92.97	0.65	64.62
	84.36	0.31	43.64		83.26	0.68	59.47
	93.29	0.3	41.17		82.3	0.71	61.89
	89.59	0.282	32.87		82.51	0.67	56.99
	90.53	0.322	37.65		84.93	0.74	62.86
	82.76	0.3	38.22		82.96	0.74	66.23
	94.87	0.272	42.65		89.31	0.65	59.87
	93.98	0.302	41.82		91.73	0.73	65.2
	92.86	0.302	42.19		85.38	0.69	63.86
	84.35	0.28	35.53		88.15	0.72	58.29
	91.87	0.35	35.65		87.26	0.66	58.82
	82.26	0.312	41.59		91.86	0.7	56.06
	87.93	0.32	43.39		91.45	0.64	56
	83.31	0.31	35.85		94.4	0.71	61.4
	83.17	0.312	35.3		91.42	0.68	56.44
	88.3	0.29	33.63		94.09	0.74	62.43
	88.75	0.342	36.56		86.6	0.75	61.25
	88.2	0.322	37.94		87.56	0.66	58.09
	84.76	0.322	39.85		93.95	0.71	60.59
	93.46	0.34	41.07		92.91	0.62	56.97
	80.98	0.342	33.99		90.11	0.67	63.37
	84.02	0.302	36.13		90.72	0.65	56.45
	92.43	0.29	33.31		87.01	0.66	64.45
	80.34	0.302	35.99		83.49	0.67	55.45
	91.3	0.28	40.94		90.58	0.68	60.87
	80.59	0.302	40.26		91.19	0.69	56.27
	88.82	0.33	36.82		85.67	0.66	57.69
	90.55	0.33	41.86		89.03	0.75	57.15
	81.66	0.32	40.28		89.19	0.74	61.9
	87.48	0.33	39.51		92.49	0.66	58.86
	93.45	0.3	42.05		91.54	0.74	55.2
	93.52	0.312	42.61		87.27	0.65	64.92
	87.08	0.28	36.98		88.78	0.71	65.46
	94.54	0.33	35.13		83.89	0.7	55.49
	83.21	0.29	42.62		83.88	0.64	64.29
	92.72	0.32	41.02		84.36	0.72	61.24
	92.22	0.312	32.85		84.58	0.71	58.83
	87.47	0.282	39.6		87.17	0.66	65.5
	82.6	0.29	42.56		86.2	0.69	62.62
	82.64	0.342	39.49		84.82	0.65	60.04
	84.69	0.302	34.63		93.83	0.73	62
	93.41	0.29	34.1		93.51	0.66	56.42
	92.13	0.28	35.85		86.01	0.67	60.58
	81.65	0.31	41.65		84.07	0.67	59.08
	92.2	0.272	36.33		85.9	0.66	62.57
	94.13	0.282	36.22		89.21	0.69	65.73
	87.74	0.282	38.48		88.01	0.73	65.42
	85.7	0.292	32.45		88.39	0.64	58.87
	92.58	0.342	33.24		82.86	0.63	56.55
	87.94	0.272	33.95		92.14	0.7	63.84
	94.59	0.29	36.01		86.71	0.68	59.11
	91.83	0.3	33.84		86.55	0.65	61.19
	80.05	0.282	38.37		87.82	0.65	62.28
	83.1	0.34	35.87		85.03	0.73	55.39
	91.23	0.29	36.7		86.6	0.72	59.06
	91.37	0.282	37.64		85.24	0.68	61.15
	87.27	0.342	38.22		92.16	0.7	62.21
	80.99	0.28	35.11		89.51	0.74	57.81
	79.82	0.302	32.42		94.92	0.67	63.93
	85.15	0.33	34.18		88.69	0.73	66.08
	81.07	0.342	32.93		87.76	0.71	63.69
	91.95	0.282	36.43		91.27	0.71	60.96
	94.7	0.28	38.6		90.97	0.73	63.49
	94.7	0.312	41.6		94.37	0.65	57.67
	86.63	0.322	42.3		89.17	0.71	64.79
	93.5	0.292	43.14		94.09	0.71	59.66
	91.55	0.31	35.12		84.92	0.74	56.55
	83.47	0.322	35.13		90.44	0.64	60.05
	91.73	0.332	37.12		87.65	0.73	58.96
	87.73	0.292	42.3		85.32	0.73	57.54
	89.5	0.342	39.17		93.69	0.66	57.7
	92.83	0.28	39.04		92.53	0.66	60.68
	87.66	0.292	32.12		92.06	0.63	55.77
	83.83	0.312	37.47		85.53	0.69	56.83
	84.23	0.3	39.37		86.29	0.71	62.48
	80.18	0.342	43.58		90.88	0.7	57.07
	93.88	0.292	42.77		90.94	0.67	57.3
	82.74	0.312	40.68		85.33	0.67	58.45
	94.98	0.272	43.84		94.1	0.67	57.25
	80.11	0.332	42.01		91.13	0.65	65.81
	81.58	0.33	34.8		91.05	0.74	61.33
	92.24	0.332	33.65		84.55	0.73	56.98
	92.32	0.33	37.46		85.72	0.64	59.98
	88.69	0.29	37.44		92.8	0.73	64.43
	91.53	0.322	42.48		87.37	0.65	65.73
	87.04	0.332	36.71		88.84	0.67	58.78
	84.58	0.29	32.06		83.28	0.72	66.02
	83.16	0.31	41.23		85.73	0.68	55.79
	83.24	0.272	38.97		88.65	0.69	60.62
	85.91	0.312	38.3		89.16	0.68	56.21
	87.47	0.302	37.55		87.99	0.66	66.92
	82.1	0.34	35.76		87.17	0.7	59.03
	90.87	0.29	38.85		90.28	0.69	65.23
	92.06	0.35	35.17		85.48	0.71	65.31
	92.33	0.302	41.32		87.24	0.71	57.28
	87.06	0.34	32.01		94.19	0.64	55.95
	94.3	0.322	43.69		82.68	0.68	59.42
	84.08	0.31	37.18		93.68	0.68	59.65
	91.37	0.292	36.78		85.86	0.67	63.06
	85.35	0.33	35.16		84.96	0.67	62.58
	81.94	0.3	38.68		83.31	0.74	58.82
	87.9	0.312	34.7		90.02	0.67	59.62
	82.19	0.282	38.22		82.91	0.71	58.42
	83.34	0.292	34.17		90.75	0.66	60.91
	91.24	0.33	40.28		85.37	0.7	65.23
	87.62	0.282	35.95		84.53	0.68	57.55
	81.54	0.33	39.16		84.95	0.63	64.54
	88.23	0.28	36.67		83.75	0.64	65.43
	92.69	0.32	32.44		95	0.71	59.75
	90.68	0.292	33.6		93.07	0.72	57.88
	93.74	0.322	38.15		82.36	0.68	60.72
	83.82	0.3	37.02		90.91	0.7	64.1
	94.43	0.28	36.61		88.6	0.73	66.93
	80.84	0.3	35.61		85.02	0.62	60.02
	88.11	0.282	37.98		89.54	0.66	62.45
	88.39	0.33	35.13		94.31	0.68	56.72
	87.89	0.312	41.82		93.82	0.63	55.98
	83.87	0.312	34.91		93	0.65	59.41
	80.54	0.312	37.92		82.36	0.65	62.72
	80.58	0.322	37.26		83.02	0.68	65.84
	86.07	0.3	34.43		92.21	0.71	58.71
	85.26	0.292	32.26		89.78	0.73	55.94
	91.07	0.31	38.59		88.91	0.68	56.14
	86.34	0.332	32.71		88.93	0.72	61.81
	81.08	0.322	39.23		92.12	0.75	58.18
	92.05	0.28	40.96		86.04	0.65	59.5
	84.93	0.322	38.15		84.64	0.67	60.64
	85.21	0.31	43.36		93.5	0.64	66.93
	90.6	0.302	37.42		92	0.63	59.39
	83.45	0.29	34.17		88.36	0.64	64.94
	91.35	0.28	42.09		82.47	0.66	63.91
	80.01	0.292	34.77		93.62	0.71	55.27
	92.56	0.312	38.81		86.47	0.66	63.33
	80.69	0.332	40.06		82.49	0.69	60.05
	94.9	0.302	37.9		92.32	0.66	66.37
	85.13	0.282	43.58		85.55	0.66	57.55
	79.9	0.31	39.54		86.86	0.66	65.72
	82.03	0.342	32.58		87.65	0.69	55.17
	86.7	0.292	42.95		88.87	0.7	55.13
	89.7	0.29	39.6		84.74	0.69	65.62
	91.33	0.34	33.94		88.47	0.69	58.13
	81.97	0.29	34.31		82.9	0.63	56.46
	91.33	0.302	38.13		90.76	0.71	57.43
	87.52	0.3	33.97		88.04	0.67	62.69
	88.66	0.31	39.69		83.89	0.64	66.46
	93.08	0.31	39.91		87.66	0.68	63.05
	94.38	0.272	37.37		89.25	0.73	65.03
	92.45	0.332	36.58		87.94	0.69	65.51
	80.44	0.28	40.62		83.95	0.65	63.99
	81.45	0.342	38.98		84.69	0.68	63.46
	90.96	0.28	41.56		86.08	0.68	64.7
	82.24	0.29	38.04		89.16	0.63	62.73
	89.81	0.312	42.87		83.19	0.67	56.03
	80.45	0.33	43.52		92.57	0.65	61.96
	82.72	0.322	39.78		87.12	0.67	65.78
	83.89	0.312	37.49		89.2	0.63	64.92
	81.12	0.322	42.38		87.03	0.65	66.59
	90.26	0.282	38.02		89.9	0.66	64.47
	90.59	0.29	37.5		84.18	0.67	63.19
	94.44	0.332	38.52		91.79	0.71	58.47
	86.7	0.33	34.08		87.1	0.71	59.47
	84.5	0.302	41.22		87.12	0.63	65.1
	90.45	0.29	43.3		89.44	0.65	66.54
	87.03	0.292	36.12		83.54	0.71	57.72
	89.79	0.32	38.9		91.19	0.73	62.04
	90.04	0.322	41.32		83.7	0.75	66.58
	85.55	0.29	42.03		88.8	0.74	65.3
	90.75	0.302	33.34		94.11	0.64	56.53
	82.93	0.3	36.61		90.82	0.68	63.16
	93.44	0.292	38.62		86.07	0.68	62.04
	91.08	0.34	33.11		84.71	0.65	58.34
	93.73	0.322	42.38		86.56	0.65	55.41
	89.36	0.33	33.7		87.06	0.69	59.81
	87.33	0.342	43.37		82.29	0.74	63.13
	86.95	0.32	43.1		94.52	0.68	61.43
	92.13	0.312	33.8		90.32	0.65	58.68
	79.87	0.322	34.96		92.71	0.67	65.46
	89.72	0.34	35.02		86	0.67	57.48
	91.57	0.312	34.56		90.97	0.72	65.14
	90.01	0.322	38.2		91.65	0.63	64.41
	91.58	0.28	34.11		93.81	0.68	58.81
	83.59	0.302	36.13		87.28	0.7	63.32
	91.23	0.3	40.51		82.63	0.65	62.4
	87.49	0.312	40.79		86.14	0.7	61.52
	83.97	0.302	42.65		88.35	0.75	59.24
	83.37	0.292	38.83		91.94	0.74	66.62
	92.67	0.29	39.23		90.11	0.74	62.17
	81.95	0.332	42.38		82.49	0.64	55.62
	79.82	0.3	38.65		88.7	0.7	59.08
	84.53	0.292	35.15		86.38	0.69	55.9
	92.75	0.292	38.72		82.73	0.65	64.42
	86.89	0.342	40.44		87.44	0.69	62.25
	80.53	0.29	42.37		85.57	0.66	60.1
	87.31	0.312	35.49		87.48	0.64	60.35
	87.17	0.28	43.25		91.71	0.68	64.52
	89.25	0.29	34.45		91.73	0.7	58.19
	85.66	0.292	39.61		93.56	0.64	61.6
	80.92	0.31	32.33		83.09	0.71	56.45
	86.43	0.29	40.7		83	0.7	64.32
	83.09	0.332	37.35		94.81	0.73	63.88
	83.47	0.282	36.34		86.18	0.68	66.49
	92.67	0.302	32.58		86.45	0.66	65.51
	88.37	0.28	39.94		83.55	0.66	66.28
	82.95	0.342	43.63		82.88	0.68	58.46
	84.22	0.322	41.75		93.19	0.62	56.81
	82.11	0.322	32.16		84.45	0.72	63.99
	87.66	0.272	34.68		83.13	0.66	55.23
	88.09	0.322	40.38		90.01	0.7	59.22
	82.67	0.33	33.41		89.7	0.63	55.29
	94.12	0.282	36.37		94.82	0.71	59.72
	93.34	0.292	32.58		90.34	0.7	65.98
	91.57	0.28	38.02		88.64	0.63	64.86
	91.73	0.272	33.1		91.15	0.74	64.78
	87.01	0.312	36.14		93.92	0.67	57.67
	86.62	0.332	33.02		94.24	0.66	58.5
	84.96	0.35	36.29		89.13	0.68	58.67
	91.79	0.302	38.95		91.27	0.67	55.49
	87.27	0.302	43.49		84.54	0.72	63.71
	84.77	0.332	38.47		90.55	0.65	64.73
	92.92	0.322	43.95		88.79	0.67	55.79
	93.88	0.342	41.83		87.24	0.64	58.15
	82.62	0.312	39.91		90.94	0.7	63.25
	93.17	0.3	35.33		85.84	0.66	55.32
	82.59	0.32	33.39		84.23	0.63	63.83
	81.5	0.29	33.31		93.9	0.66	61.51
	87.01	0.34	39.35		85.41	0.65	57.76
	86.05	0.33	41.22		88.85	0.63	57.82
	86.69	0.322	36.7		83.6	0.7	56.51
	92.13	0.342	39.99		83.77	0.63	55.27
	86.79	0.28	36.35		91.76	0.68	56.09
	84.18	0.322	32.58		91.35	0.72	63.07
	93.65	0.35	34.02		92.01	0.72	63.49
	85.49	0.28	39.65		93.09	0.69	58.05
	91.13	0.322	38.14		91.83	0.68	56.95
	85.7	0.32	36.49		94.41	0.65	58.81
	89.98	0.32	40.49		91.29	0.74	64.08
	83.31	0.332	35.64		84.62	0.73	61.14
	86.08	0.34	42.69		93.17	0.71	67
	82.71	0.302	36.21		87.31	0.63	60.87
	89.91	0.31	36.09		88.76	0.74	60.56
	88.47	0.332	32.12		83.17	0.67	62.75
	81.68	0.322	35.62		83.5	0.67	60.18
	86.61	0.29	33.66		86.26	0.67	66.07
	83.35	0.34	35.19		91.96	0.71	59.83
	81.77	0.3	40.84		91.87	0.63	66.97
	93.72	0.282	36.24		90.61	0.63	65.6
	86.8	0.33	39.81		86.4	0.65	63.77
	86.49	0.32	36.43		89.27	0.64	55.05
	82	0.33	41.99		89.21	0.7	65.13
	83.69	0.33	41.07		89.08	0.71	55.7
	90.56	0.292	33.73		82.65	0.69	66.86
	93.63	0.33	38.32		82.48	0.7	60.76
	85.51	0.332	40.89		85.36	0.7	58.49
	92.99	0.282	40.17		92.45	0.66	60.34
	81.36	0.28	43.26		88.24	0.67	56.17
	94.43	0.32	42.7		82.82	0.67	57.27
	82.47	0.342	33.86		91.45	0.75	63.45
	92.39	0.31	35.59		85.45	0.73	57
	94.05	0.32	34.97		87.02	0.75	55.46
	90.45	0.35	33.45		83.17	0.68	58.62
	94.25	0.322	37.55		83.91	0.73	55.02
	80.08	0.32	41.05		94.7	0.72	65.43
	82.67	0.31	41.7		87.24	0.63	66.16
	87.58	0.282	43.13		83.99	0.7	58.74
	94.16	0.3	40.15		84.87	0.66	61.85
	80.1	0.342	39.74		85.01	0.67	59.75
	79.95	0.282	38.05		83.22	0.64	64.79
	82.92	0.302	33.99		94.82	0.73	56.63
	90.35	0.34	39.86		93.43	0.67	62.27
	87.69	0.292	33.7		90.16	0.71	61.04
	90.8	0.3	33.93		94.86	0.71	55.9
	83.75	0.282	33.38		94.96	0.67	65.69
	92.25	0.302	32.74		83.05	0.72	55.92
	84.18	0.35	33.3		88.08	0.66	65.43
	83.31	0.32	35.3		83.14	0.74	59.54
	94.15	0.35	42.94		87.94	0.63	56.39
	85.5	0.292	38.81		85.95	0.66	57.29
	92.84	0.282	37.55		82.79	0.65	60.22
	88.28	0.282	41.58		90.47	0.75	62.21
	91.81	0.28	37.38		89	0.72	58.3
	81.6	0.342	43.33		83.94	0.73	59.05
	86.58	0.302	40.09		90.71	0.69	66.22
	85.22	0.272	32.51		87.6	0.74	60.87
	84.91	0.34	41.53		90.78	0.66	66.52
	82.86	0.322	34.04		84.93	0.71	61.21
	90.92	0.282	39.28		85.02	0.72	65.35
	82.63	0.29	43.27		86.84	0.74	58.59
	85.87	0.282	38.76		85.37	0.63	65.85
	89.12	0.32	35.98		87.17	0.63	58.39
	83.26	0.302	34.75		86.58	0.66	61.84
	94.94	0.34	35.69		90.03	0.66	56.72
	92.96	0.302	42.88		85.21	0.63	66.62
	92.79	0.342	38.46		86.42	0.68	58.73
	82.43	0.342	34.49		83.27	0.75	58.74
	80.05	0.35	36.93		91.75	0.63	57.71
	94.63	0.342	39.79		85.45	0.68	64.38
	94.36	0.29	37.83		90.5	0.71	62.69
	87.68	0.3	37.99		93.18	0.74	66.71
	91.49	0.34	34.12		93.04	0.72	58.43
	84.48	0.31	36.22		89.46	0.66	66.59
	85.98	0.312	40.37		85.53	0.69	55.72
	85.72	0.332	43.29		86.35	0.74	63.76
	86.83	0.282	32.9		89.27	0.67	66.48
	93.18	0.28	35.8		87.83	0.65	55.6
	93.13	0.29	40.79		88.83	0.71	63.42
	90.12	0.32	42.76		86.31	0.65	60.22
	86.99	0.28	41.36		91.09	0.68	55.14
	88.95	0.29	39.37		92.4	0.71	57.75
	89.18	0.28	34.4		93.34	0.7	62.63
	82.39	0.28	37.46		87.47	0.7	62.54
	88.47	0.292	32.1		85.52	0.75	63.07
	81.62	0.33	35.14		86.65	0.62	57.73
	85.49	0.332	36.45		87.14	0.71	57.83
	91.91	0.292	39.5		93.81	0.63	65.52
	92.39	0.282	35.44		89.77	0.68	64
	94.66	0.28	40.73		84.36	0.73	63.26
	87.88	0.34	39.18		86.82	0.7	66.11
	94.23	0.3	34.53		85.77	0.75	56.04
	85.65	0.322	32.46		83.89	0.65	64.03
	88.86	0.32	38.29		85.41	0.71	59.72
	85.78	0.28	38.21		94.84	0.71	65.83
	93.03	0.292	32.84		92.77	0.69	64.65
	84.56	0.33	43.86		83.41	0.73	60.1
	84.99	0.35	33.9		89.74	0.68	58.45
	85.49	0.34	39.8		87.36	0.71	64.62
	91.9	0.302	38.45		84.27	0.71	62.11
	83.75	0.31	41.91		89.43	0.68	56.54
	94.85	0.302	41.4		84.88	0.68	66.12
	82.4	0.302	34.95		87.89	0.66	57.81
	83.87	0.282	39.27		90.98	0.74	57.31
	80.75	0.28	36.15		85.44	0.7	61.72
	83.77	0.302	35.61		88.6	0.65	64.36
	81.24	0.31	37.39		86.53	0.72	66.79
	84.09	0.33	39.53		92.09	0.64	57.88
	81.92	0.33	39.35		90.53	0.72	62.66
	80.98	0.292	34.36		84.71	0.64	58.58
	83.44	0.28	33.08		94.75	0.64	66.16
	86.15	0.28	42.19		92.28	0.67	66.91
	80.09	0.28	34.48		84.76	0.67	66.43
	85.99	0.342	33.3		89.08	0.7	65.59
	87.67	0.312	32.49		89.62	0.65	66.92
	93.73	0.33	36.96		92.59	0.73	65.26
	83.79	0.28	41.82		87.43	0.68	62.56
	94.93	0.3	34.18		86.19	0.71	57.17
	83.02	0.35	39.83		86.15	0.74	65.43
	90.39	0.34	39.66		93.63	0.67	63.52
	80.26	0.3	43.68		88.15	0.69	58.59
	81.28	0.29	37.54		94.45	0.74	66.01
	83.33	0.3	38.18		90.26	0.7	60.29
	82.86	0.33	39.33		88.38	0.67	62.2
	91.18	0.282	33.38		82.46	0.66	63.51
	87.41	0.34	40.26		89.02	0.63	59.14
	87.28	0.282	40.31		89.72	0.65	60.58
	80.52	0.282	39.33		92.71	0.69	65.43
	82.66	0.292	33		89.69	0.69	55.76
	81.86	0.292	42.75		93.92	0.73	57.08
	89.66	0.302	43.43		92.67	0.63	64.31
	80.8	0.342	38.52		85.45	0.66	66.38
	90.94	0.312	32.7		94.13	0.73	66.33
	79.9	0.342	37.8		88.85	0.69	58.82
	84.41	0.29	40.43		89.02	0.72	63.74
	87.3	0.34	39.54		88.58	0.66	55.34
	91.65	0.332	35.49		93.62	0.7	61.45
	86.42	0.29	37.87		89.01	0.64	63.68
	91.78	0.32	36.54		85.32	0.64	59.95
	86.48	0.292	43.85		89.48	0.71	56.78
	84.27	0.34	37.27		86.28	0.67	65.35
	92.72	0.34	40.13		87.54	0.72	58.31
	87.72	0.29	36.37		92.26	0.74	56.41
	86.66	0.312	37.78		91.69	0.69	63.15
	81.69	0.282	34.58		92.59	0.69	62.97
	84.7	0.332	35.04		94.08	0.63	58.8
	91.72	0.312	35.47		91.47	0.64	59.97
	88.05	0.282	35.9		89.51	0.67	64.79
	82.36	0.302	35.58		88.84	0.69	63.26
	89.78	0.332	36.74		88.19	0.64	63.64
	81.33	0.33	43.15		84.13	0.74	65.82
	93.71	0.28	33.61		87.28	0.74	66.6
	90.14	0.31	37.17		87.1	0.69	55.04
	88.18	0.3	32.63		94.14	0.68	65.19
	87.61	0.292	34.4		83.29	0.63	55.33
	94.65	0.33	35.8		90.61	0.73	61.58
	92.36	0.34	34.82		88.18	0.71	64.62
	93.73	0.342	39.26		94.89	0.69	61.83
	81.42	0.32	39.32		89.57	0.65	56.76
	85.9	0.32	40.2		84.64	0.65	56.37
	90.42	0.292	42.97		88.42	0.66	63.78
	92.42	0.292	42.1		90.77	0.64	56.66
	93.91	0.29	41.03		89.66	0.71	66.36
	94.8	0.29	38.57		83.82	0.68	62.86
	92.46	0.342	40.49		92	0.68	64.75
	91.83	0.35	35.29		82.84	0.71	62.66
	81.8	0.312	42.32		84.55	0.65	60.55
	94.93	0.292	35.44		84.42	0.72	66.65
	83.56	0.302	37.23		84.61	0.72	64.18
	83.91	0.312	37.78		88.16	0.74	58.06
	87.53	0.302	34.72		87.44	0.71	56.47
	88	0.34	43.61		94.44	0.68	65.37
	84.69	0.302	40.26		88.16	0.64	66.79
	88.88	0.31	35.57		88.2	0.73	58.08
	92.07	0.3	33.56		89.66	0.68	66.91
	93.39	0.31	36.01		87.04	0.72	65.91
	80.01	0.302	41.48		93.46	0.63	56.57
	81.75	0.292	41.2		90.73	0.74	58.41
	92.29	0.29	38.04		94	0.67	58.91
	86.8	0.312	39.22		94.18	0.74	60.82
	89.08	0.332	36.14		84.34	0.73	57.01
	91.99	0.282	35.13		88.54	0.71	62.8
	80.39	0.302	35.9		88.53	0.66	63.9
	91.66	0.35	42.63		89.88	0.72	66.56
	85.73	0.33	34.09		92.79	0.66	63.22
	91.94	0.29	36.75		93.92	0.73	63.66
	90.04	0.332	43.88		92.82	0.65	66.75
	86.9	0.35	36.67		93.94	0.67	62.66
	84.99	0.31	39.85		82.29	0.71	60.56
	86.44	0.32	43.09		93.63	0.73	63.58
	89.78	0.302	33.74		89.48	0.71	65.47
	92.19	0.34	35.7		90.13	0.62	65.72
	84.59	0.282	35.88		93.01	0.66	63.38
	81.98	0.31	36.35		93.51	0.63	63.89
	94.12	0.29	32.17		90.45	0.65	61.88
	88.65	0.34	41.49		84.21	0.7	60.24
	80.08	0.32	36.16		88.59	0.75	66.31
	90.53	0.29	32.49		87.11	0.66	56.35
	87.66	0.312	37.02		84.6	0.64	61.55
	81	0.34	33.06		94.84	0.62	58.05
	92.64	0.292	32.01		86.61	0.7	65.49
	85.87	0.302	41.75		94	0.65	56.05
	86.36	0.32	33.29		91.62	0.67	64.85
	84.58	0.342	42.1		91.61	0.63	62.5
	87.29	0.31	41.5		86.99	0.65	65.2
	89.38	0.28	42.8		87.48	0.69	59.53
	80.87	0.342	40.51		89.83	0.67	66.3
	92.39	0.332	38.22		85.95	0.7	64.06
	92.13	0.292	43.11		88.68	0.71	65.51
	93.41	0.272	35.23		83.23	0.73	66.11
	83.51	0.312	33.88		90.17	0.74	66.89
	80.8	0.342	42.22		84.69	0.71	56.23
	89.59	0.33	37.55		91.75	0.68	63.68
	80	0.292	43.91		83.29	0.64	61.63
	85.21	0.272	40.48		87.64	0.71	61.25
	94.87	0.282	33.41		90.72	0.64	56.77
	83.42	0.31	40.83		94.94	0.65	56.3
	83.54	0.322	37.56		85.78	0.74	57.59
	94.39	0.332	32.79		87.5	0.7	62.85
	87.45	0.302	34.17		84.78	0.72	60.86
	86.11	0.33	42.18		82.22	0.66	64.78
	89.79	0.34	42.89		82.51	0.64	66.61
	94.66	0.312	32.32		90.75	0.64	65.77
	81.7	0.29	37.72		82.77	0.7	57.36
	83.28	0.302	39.09		89.61	0.65	63.54
	92.66	0.34	38.26		85.41	0.66	64.59
	83.38	0.292	32.9		94.93	0.7	58.8
	94.72	0.282	32.21		89.99	0.71	62.05
	86.29	0.29	36.63		89.84	0.72	56.46
	82.41	0.3	39.22		94.26	0.63	65.52
	84.14	0.29	43.4		93.69	0.73	56.78
	93.88	0.31	32.39		87.19	0.73	56.68
	87.66	0.33	36.32		83.08	0.73	55.14
	81.1	0.282	42.53		89.03	0.67	55.74
	88.61	0.322	34.41		94.56	0.66	61.75
	80.65	0.272	34.03		83.88	0.62	64.69
	87.41	0.3	36.91		86.65	0.66	64.44
	93.5	0.3	39.78		86.23	0.63	56.28
	83.13	0.322	41.13		94.13	0.66	55.09
	83.52	0.32	37.26		91.18	0.68	58.54
	83.23	0.34	38.03		89.05	0.67	66.3
	90.83	0.312	36.17		91.54	0.69	57.37
	88.95	0.292	42.21		86.33	0.66	62.6
	80.48	0.3	35.23		83.53	0.67	64.02
	85.86	0.332	36.01		86.04	0.68	66.69
	90.53	0.33	42.87		87.08	0.69	63.59
	88.13	0.322	34.67		88.56	0.68	63.31
	91.68	0.28	35.91		92.48	0.74	56.06
	90.12	0.29	36.89		90.51	0.7	56.3
	88.65	0.322	32.33		90.33	0.68	66.6
	90.9	0.312	41.46		86.89	0.67	65.38
	83.42	0.302	40.41		91.82	0.64	61.01
	83.45	0.31	32.16		85.2	0.63	64.31
	83.09	0.31	43.56		87.11	0.71	58.75
	81.14	0.3	32.82		93.95	0.63	57.31
	91.56	0.28	39.07		89.35	0.7	63.45
	85.22	0.34	40.45		91.67	0.7	56.36
	93.78	0.302	39.61		85.48	0.69	61.19
	93.57	0.35	42.71		94.34	0.64	62.38
	80.21	0.292	43.17		85.23	0.72	64.86
	83.69	0.282	34.41		83.32	0.66	56.5
	84.53	0.302	39.8		88.33	0.69	56.04
	87.31	0.312	35.55		94.32	0.63	56.05
	85.38	0.34	43.26		91	0.74	66.09
	94.07	0.34	40.47		89.55	0.68	59.27
	94.81	0.342	38.51		88.17	0.74	59.33
	91.92	0.33	36.73		90.16	0.72	55.37
	94.11	0.322	43.21		94	0.69	58.1
	92.73	0.34	38.84		88.65	0.71	66.94
	84.96	0.312	42.5		82.23	0.64	65.01
	85.57	0.31	40.59		90.07	0.71	65.1
	88.24	0.342	33.82		92.98	0.7	61.69
	88.69	0.29	42		92.94	0.72	56.24
	91.17	0.33	42.89		87.16	0.65	58.28
	85.16	0.32	36.85		86.22	0.75	62.66
	90.32	0.312	33.33		88.29	0.67	59.21
	87.63	0.312	42.53		88.75	0.74	66.43
	82.39	0.292	34.55		91.53	0.67	60.25
	92.58	0.28	41.96		85.91	0.63	57.02
	81.27	0.3	32.26		87.06	0.63	60.41
	88.17	0.322	32.45		90.38	0.73	64.63
	92.48	0.32	36.5		94.52	0.64	55.74
	87.36	0.3	38.64		90.92	0.64	65.25
	81.92	0.34	42		93.55	0.73	63.38
	87.22	0.28	36.7		90.87	0.65	65.54
	80.65	0.28	40.22		85.78	0.63	57.43
	90.84	0.312	34.55		88.31	0.68	66.95
	80.08	0.3	38.81		93.05	0.63	60.64
	80.57	0.292	37.49		93.43	0.64	59.45
	84.96	0.34	37.9		93.2	0.64	61.26
	82.26	0.35	40.94		91.61	0.71	65.38
	80.52	0.32	39.04		92.24	0.74	59.3
	91.56	0.28	43.68		82.63	0.67	61.28
	81.71	0.3	38.96		85.14	0.73	65.02
	88.43	0.322	34.66		90.1	0.71	64.86
	85.22	0.35	43.07		90.1	0.73	56.34
	93.92	0.34	34.95		92.66	0.71	57.79
	83.49	0.28	34.58		82.86	0.67	58.04
	89.79	0.28	42.92		93.91	0.71	57.01
	90.14	0.332	32.62		84.15	0.67	59.75
	80.76	0.342	33.2		93.55	0.63	62.47
	92.21	0.32	42.79		83.23	0.68	56.58
	80.8	0.332	37.44		93.07	0.67	65.05
	94.54	0.31	39.78		90.83	0.67	55.15
	84.45	0.292	34.73		93.24	0.72	66.98
	84.93	0.29	34.99		92.16	0.66	64.01
	91.55	0.31	41.58		86.77	0.64	61.62
	89.12	0.282	33.86		92.53	0.64	56.15
	88.1	0.292	38.89		87.94	0.63	55.96
	82.06	0.302	42.41		85.37	0.7	66.05
	86.58	0.322	35.86		86.89	0.69	61.19
	82.54	0.29	42.13		83.29	0.64	65.19
	83.29	0.35	33.06		82.3	0.63	61.5
	94.76	0.29	34.57		85.78	0.68	60.79
	87.11	0.342	33.16		87	0.64	63.94
	80.76	0.29	43.68		91.47	0.64	59.85
	84.91	0.28	36.53		87.48	0.65	65.2
	93.56	0.342	37.44		88.58	0.73	64.98
	81.28	0.33	38.69		83.75	0.67	60.44
	94.37	0.29	40.96		92.31	0.74	64.45
	88.3	0.28	33.64		86.49	0.73	60.38
	81.68	0.35	43.85		90.04	0.71	59.21
	86.18	0.292	37.53		88.27	0.64	59.35
	85.41	0.282	42.63		92.02	0.65	62.91
	83.82	0.32	34.28		85.79	0.75	58.4
	92.73	0.282	32.14		84.06	0.69	63.23
	90.29	0.28	38.04		86.42	0.69	57.86
	80.57	0.342	38.03		88.41	0.72	57.08
	86.91	0.272	35.2		89.72	0.64	61.01
	80.15	0.34	34.71		94.41	0.67	59.96
	82.09	0.282	35.41		90.36	0.71	57.97
	94.48	0.35	41.22		92.56	0.73	63.05
	89.04	0.31	43.11		86.1	0.64	55.77
	91.64	0.302	36.96		84.78	0.71	59.4
	81.33	0.32	33.3		84.75	0.69	62.93
	81.04	0.33	32.04		85.23	0.71	59.52
	84.27	0.302	40.04		88.42	0.73	63.5
	90.66	0.302	36.93		82.67	0.7	58.65
	94.75	0.33	37.2		93.14	0.71	63.74
	82.14	0.332	38.46		87.86	0.63	61.06
	90.1	0.282	40.52		90	0.74	64.61
	89.56	0.342	34.59		92.07	0.66	64.03
	91.98	0.28	43.49		87.85	0.72	56.46
	91.68	0.312	32.81		86.29	0.66	60.11
	83.49	0.33	34.93		90.12	0.67	62.49
	92.41	0.33	33.3		92.52	0.7	58.37
	90.68	0.302	35.88		82.35	0.68	66.83
	92.66	0.292	33.15		88.17	0.64	61.52
	82.28	0.282	39.46		93.27	0.65	61.54
	89.05	0.342	35.05		93.27	0.63	65.77
	92.46	0.35	41.11		84.09	0.66	55.73
	89.53	0.292	41.51		93.07	0.71	65.82
	82.14	0.32	41.27		88.97	0.63	63.27
	94.38	0.342	34.18		93.16	0.69	58.03
	85.86	0.272	38.91		91.54	0.62	56.91
	84.95	0.332	42.13		91.29	0.71	56.66
	81.07	0.31	38.61		84.11	0.73	64.76
	82.95	0.322	35.51		88.15	0.7	62.02
	80.89	0.342	38.4		84.15	0.71	65.74
	89.16	0.33	37.95		90.38	0.71	63.18
	85.7	0.282	38.64		83.95	0.65	58.22
	93.38	0.332	39.46		86.22	0.64	64.55
	91.18	0.3	40.67		87.35	0.66	63.96
	79.9	0.32	37.53		94.74	0.71	63.91
	86.2	0.332	34.82		90.33	0.71	66.03
	93.58	0.312	32.57		91	0.74	60.75
	81.34	0.272	37.35		86.57	0.74	66.04
	83.23	0.28	33.57		83.31	0.63	60.92
	91.55	0.342	43.22		82.42	0.65	57.2
	80.97	0.282	43.08		93.87	0.72	58.02
	91.65	0.342	42.27		93.91	0.68	55.83
	81.24	0.272	42.35		82.69	0.63	60.08
	80.27	0.302	40.82		87.99	0.7	58.98
	84.92	0.34	35.06		86.9	0.68	64.85
	91.65	0.29	36.23		89.95	0.65	56.97
	93.75	0.31	34.4		91.13	0.65	60.89
	80.47	0.342	42.57		86.73	0.72	55.07
	81.57	0.292	37.1		94.83	0.72	60.96
	80.08	0.35	34.9		83.64	0.72	62.11
	93.67	0.302	43.92		90.05	0.74	64.48
	92.28	0.28	33.9		84.35	0.75	55.43
	87.67	0.3	37.36		82.32	0.63	62.39
	86.9	0.28	42.94		82.61	0.71	60.09
	90.83	0.33	37.53		85.35	0.65	63.18
	90.75	0.282	34.65		88.76	0.71	57.55
	94.4	0.302	42.76		86.11	0.63	59.85
	89.41	0.342	42		91.24	0.64	55.83
	88.1	0.332	36.77		89.72	0.64	62.5
	92.12	0.332	35.85		90.1	0.71	65.29
	87.12	0.28	39.94		84.59	0.72	60.04
	81.29	0.332	39.11		87.74	0.68	65.1
	82.57	0.282	38.67		93.26	0.72	59.53
	90.41	0.332	41.12		87.63	0.62	63.15
	91.79	0.31	43.11		87.36	0.65	63.61
	91.34	0.3	40.58		94.78	0.74	63.77
	92.71	0.33	34.54		88.89	0.63	60.95
	81.85	0.3	36.52		92.38	0.73	58.09
	89.92	0.3	38.52		86.76	0.66	55.28
	84.65	0.32	42.2		91.75	0.74	58.58
	84.22	0.29	35.75		83.6	0.68	64.35
	90.58	0.322	33.56		86.7	0.75	61.06
	93.3	0.28	38.14		89.81	0.67	62.92
	90.33	0.282	35.88		89.54	0.67	63.45
	92.03	0.34	40.47		82.73	0.71	56.44
	86.15	0.28	33.15		92.41	0.69	58.81
	86.03	0.35	36.57		89.54	0.67	58.07
	82.67	0.272	34.22		82.48	0.72	64.66
	91.83	0.302	40.37		91.65	0.74	62.05
	91.19	0.312	34.93		84.14	0.67	55.5
	86.82	0.31	37.63		94.77	0.65	55.82
	90.09	0.31	38.76		84.17	0.64	63.65
	83.2	0.3	38.19		82.59	0.63	58.95
	79.99	0.342	33.43		93.25	0.74	61.64
	88.35	0.31	37.23		88.38	0.75	60.72
	92.79	0.32	38.87		85.85	0.72	64.21
	83.3	0.312	43.17		86.7	0.64	66.97
	82.64	0.312	35.75		82.99	0.66	60.87
	81.51	0.322	41.12		86.43	0.65	64.95
	85.72	0.302	39.44		85.37	0.65	60.43
	94.24	0.35	36.36		91.07	0.71	63.79
	93.75	0.342	39.03		92.43	0.71	56.73
	81.38	0.3	40.51		92.65	0.73	58.27
	86.25	0.31	41.22		87.26	0.66	62.35
	94.41	0.342	41.8		84.75	0.65	61.52
	81.45	0.28	42.6		83.82	0.66	63.7
	92.06	0.332	36.81		88.98	0.73	64.07
	82.53	0.33	43.45		93.71	0.66	61.28
	88.29	0.28	35.19		90.28	0.66	57.76
	88.32	0.302	39.48		91.24	0.71	61.14
	94.87	0.322	40.03		86.81	0.71	58.38
	94.38	0.34	34.52		85.17	0.67	65.74
	89.12	0.272	42.61		92.25	0.67	55.35
	87.66	0.342	42.8		86.14	0.64	63.14
	94.25	0.33	37.58		88.9	0.71	59.76
	82.58	0.32	41.8		89.37	0.64	57.56
	91.38	0.33	39.36		82.9	0.69	65.83
	86.75	0.33	36.16		92.52	0.68	66.65
	85.36	0.342	32.07		87.61	0.67	63.96
	93.61	0.28	34		86.41	0.64	61.91
	89.02	0.292	41.87		84.1	0.71	56.5
	85.43	0.34	37.01		92.12	0.66	66.33
	87.13	0.31	38.13		90.21	0.68	62.34
	90.2	0.3	32.32		89.98	0.67	66.74
	90.86	0.312	41.88		85.73	0.62	63.5
	92.62	0.34	38.53		83.16	0.66	56.4
	88.82	0.282	38.44		91.32	0.68	60.95
	82.84	0.28	37.31		87.08	0.7	64.06
	88.88	0.292	37.9		88.46	0.66	56.57
	91.81	0.33	33.23		83.12	0.73	56.3
	83.06	0.29	37.88		82.31	0.64	56.44
	82.77	0.292	42.2		82.44	0.7	65.88
	94.54	0.29	37.7		90.53	0.7	59.76
	83.62	0.35	41.31		88.59	0.69	62.37
	82.22	0.28	34.12		86.57	0.74	56.03
	92.23	0.342	39.42		92.7	0.68	58.39
	88.79	0.33	38.49		89.87	0.69	62.65
	82.56	0.32	39.11		91.4	0.63	58.74
	86.58	0.34	32.22		83.18	0.66	62.62
	91.73	0.29	41.2		91.46	0.72	58.4
	80.1	0.302	40.12		90.94	0.74	64
	87.93	0.34	32.37		92.13	0.71	59.04
	87.18	0.332	35.11		94.02	0.65	59.85
	81.92	0.322	39.58		93.64	0.69	66.46
	94.95	0.32	33.82		83.67	0.67	58.92
	94.67	0.32	33.88		82.86	0.73	66.91
	87.05	0.32	39.63		85.72	0.7	56.73
	90.56	0.35	37.78		90.29	0.72	59.19
	88.3	0.32	43.14		85.44	0.64	56.99
	91.23	0.32	32.09		87.63	0.69	56.71
	92.04	0.272	43.02		86.82	0.7	59.68
	83.24	0.302	38.37		88.36	0.7	57.2
	84.35	0.32	41.31		87.21	0.74	57.45
	86.93	0.312	39.76		90.84	0.69	64.86
	82.86	0.322	33.57		91.91	0.63	57.59
	89.75	0.34	33.13		83.45	0.67	56.73
	80.75	0.312	35.03		82.58	0.71	64.66
	89.28	0.332	34.09		93.78	0.68	61.26
	87.79	0.312	39.46		86.99	0.73	64.87
	86.5	0.33	32.99		87.25	0.72	57.86
	85.28	0.28	34.14		85.49	0.66	58.15
	92.09	0.33	35.81		84.8	0.7	61.5
	87.53	0.34	33.84		87.84	0.67	60.02
	90.41	0.312	34.09		84.76	0.67	65.05
	93.94	0.342	38.56		92.59	0.66	59.65
	87.5	0.302	41.72		86.16	0.65	61.06
	90	0.35	34.25		93.97	0.71	60.32
	94.78	0.29	40.49		92.08	0.68	58.95
	80.28	0.3	39.37		87.66	0.63	57.85
	85.99	0.282	42.68		93.28	0.68	64.07
	82.78	0.28	32.88		89.09	0.66	65.23
	81.32	0.332	42.09		92.24	0.74	58.1
	84.29	0.32	39.87		83.57	0.73	57.76
	90.83	0.292	41.15		87.87	0.72	57.25
	80.79	0.322	40.94		85.09	0.69	60.58
	84.66	0.342	40.04		86.88	0.7	66.35
	85.51	0.29	42.28		82.53	0.74	60.99
	83.38	0.28	38.73		88.6	0.64	65.18
	91.67	0.312	34.17		83.35	0.66	61.49
	88.42	0.282	32.64		84.19	0.74	63.63
	85.32	0.282	39.3		88.68	0.7	60.77
	87.26	0.282	34.09		90.78	0.63	58.42
	91.98	0.292	39.36		89.92	0.68	65.3
	94.29	0.29	41.08		83.59	0.74	61.41
	90.55	0.282	34.58		83.74	0.65	58.01
	85.09	0.342	38.62		90.46	0.68	57.93
	81.43	0.292	43.84		86.36	0.63	66.63
	80.93	0.34	36.61		91.92	0.62	61.22
	84.65	0.28	36.33		87.48	0.65	62.68
	93.8	0.29	41.87		85.56	0.64	58.74
	80.02	0.28	33.48		86.02	0.66	55.4
	86.07	0.342	42.73		87.96	0.69	58.2
	92.27	0.282	34.49		90.93	0.73	63.96
	81.63	0.31	36.39		93.02	0.74	64.89
	84.08	0.302	39.44		83.53	0.74	61.85
	87.06	0.312	38.94		88.67	0.63	55.8
	81.48	0.322	33.16		86.27	0.74	65.31
	85.88	0.29	43.59		93.2	0.69	66.97
	94.98	0.272	40		84.12	0.7	63.53
	80.14	0.302	41.34		83.95	0.67	66.28
	92.36	0.312	37.86		94.83	0.64	60.38
	84.54	0.34	36.98		84.17	0.65	61.22
	88.6	0.29	39.33		90	0.69	62.85
	80.26	0.282	36.88		92.7	0.72	59.64
	85.76	0.312	32.76		93.01	0.64	63.89
	91.73	0.3	35.89		90.77	0.64	65.62
	86.15	0.322	40.35		94.28	0.69	66.6
	90.57	0.292	34.64		89.18	0.71	59.17
	92.46	0.32	36.28		83.54	0.69	55.69
	84.9	0.34	37.13		94.01	0.74	56.25
	90.44	0.282	33		84.94	0.67	66.5
	87.96	0.3	39.45		91.19	0.68	55.77
	91.3	0.322	42.39		83.92	0.73	63.5
[truncated: 6,855 more rows]

## Sheet: VGGNet
	SFEARA(VGGNet)				VGGNet
	acc	sirt	ec		acc	sirt	ec
	84.43	0.31	57.76		90.65	0.63	64.93
	84.34	0.31	59.44		91.48	0.7	80.93
	91.56	0.304	60.12		77.54	0.56	74.21
	84.33	0.35	59.26		77.68	0.64	73.13
	84.83	0.35	50.99		77.78	0.61	63.49
	78.28	0.31	52.54		93.54	0.63	68
	91.01	0.37	61.31		77.72	0.63	79.84
	92.4	0.354	47.29		90.19	0.59	77.08
	78.99	0.34	56.6		85.86	0.59	71.09
	88.03	0.344	62.32		76.78	0.55	73.17
	90.49	0.3	59.36		85.58	0.7	72.66
	83.16	0.38	58.65		86.76	0.55	71.48
	78.93	0.37	49.05		81.78	0.62	68.44
	79.32	0.33	47.73		81.81	0.58	72.76
	74.93	0.28	63.04		84.33	0.58	69.13
	83.14	0.3	57.34		83.91	0.61	71.45
	93.71	0.304	55.83		90.92	0.6	82.88
	80.77	0.314	61.87		88.78	0.58	68.29
	88.93	0.364	49.26		92.17	0.66	72.77
	83.58	0.35	47.93		92.33	0.62	76.96
	86.62	0.324	63.92		89.2	0.68	71.48
	84.91	0.334	48.41		91	0.64	75.02
	92.43	0.374	53.32		85.68	0.63	72.13
	84.39	0.344	53.96		92.58	0.69	75
	92.99	0.37	63.23		87.45	0.7	70.4
	92.7	0.31	60.67		90.22	0.63	67.76
	77.26	0.344	59.13		89.56	0.68	77.17
	77.54	0.32	52.01		81.02	0.62	66.73
	92.55	0.304	58		86.76	0.68	65.29
	85.78	0.37	61.51		88.73	0.6	81.71
	88.89	0.374	61.95		83.58	0.63	65.75
	81.28	0.37	53.93		85.48	0.65	71.53
	79.98	0.374	51.39		87.4	0.58	74.18
	83.63	0.33	49.15		80.07	0.69	67.1
	84.47	0.344	56.94		80.17	0.67	76.42
	85.24	0.28	57.49		89.77	0.64	80.2
	85.34	0.29	56.83		83.49	0.67	74.53
	74.58	0.36	53.07		80.93	0.56	70.48
	75.08	0.284	60.16		80.41	0.69	69.03
	85.12	0.284	56.64		77.91	0.68	75.3
	75.91	0.35	58.43		94.82	0.61	64.89
	92.05	0.33	52.14		91.07	0.56	66.46
	77.95	0.37	50.22		92.6	0.62	70.43
	74.55	0.354	63.12		94.3	0.55	71.26
	82.62	0.35	47.43		87.69	0.59	70.87
	77.98	0.344	46.61		78.32	0.69	74.55
	87.09	0.31	49.82		89.99	0.64	68.69
	77.89	0.304	57.64		88.36	0.69	63.31
	90.27	0.374	46.7		85.84	0.61	70.61
	77.46	0.364	57.76		92.85	0.63	69.72
	87.98	0.32	64.21		86.95	0.62	75.39
	77.81	0.3	56.48		81.9	0.56	68.76
	76.44	0.314	56.96		90.02	0.66	70.02
	81.54	0.31	50.87		83.7	0.58	75.76
	79.3	0.284	64.24		92.87	0.58	71.68
	86.22	0.294	59.98		89.33	0.56	73.24
	80.13	0.32	62.73		87.23	0.59	68.71
	81.42	0.324	56.75		86.38	0.67	82.48
	93.69	0.374	50.18		77.43	0.58	72.58
	92.97	0.36	48.99		90.14	0.68	74.31
	77.84	0.32	47.36		77.56	0.59	72.42
	90.26	0.38	53.03		81.74	0.6	66.21
	81.22	0.334	49.06		81.52	0.57	82.48
	91.92	0.32	54.91		84.96	0.61	67.47
	75.48	0.35	46.06		89.28	0.7	76.96
	91.67	0.324	49.97		76.48	0.59	64.34
	92.03	0.334	54.72		94.54	0.65	73.54
	91.42	0.37	57.48		91.29	0.59	78.08
	87.63	0.28	63.29		92.63	0.64	67.48
	76.22	0.31	49.33		80.65	0.62	73.47
	79.61	0.35	59.16		86.05	0.6	64.16
	75.32	0.324	45.25		90.61	0.65	81.19
	86.88	0.32	50.64		81.73	0.58	67.59
	91.59	0.3	61.67		82.64	0.69	79.17
	90.16	0.33	57.01		91.4	0.61	66.15
	85	0.294	53.51		91.42	0.55	69.54
	88.73	0.36	61.33		85.26	0.63	81.23
	76.48	0.354	57.11		78.57	0.66	76.96
	89.43	0.374	61.33		83.66	0.69	76.19
	75.62	0.334	50.26		89.27	0.69	67.31
	78.93	0.314	53.93		81.51	0.59	73.58
	82.18	0.294	48.94		78.68	0.68	63.56
	79.03	0.274	53.98		93.6	0.64	64.87
	80.96	0.29	56.11		81.58	0.6	73.24
	93.59	0.324	53.21		84.52	0.64	76.03
	82.93	0.354	46.55		81.08	0.64	63.63
	90.78	0.334	58.44		89.54	0.65	76.41
	88.38	0.314	63.63		91.16	0.58	73.26
	80.83	0.354	47.84		90.05	0.67	74.34
	84.79	0.37	60.19		81.84	0.67	67.93
	84.19	0.29	55.31		89.89	0.63	71.92
	74.55	0.31	62.15		83.95	0.67	70.3
	84.71	0.324	56.31		94.81	0.58	68.07
	80.65	0.34	51.11		91.73	0.69	72.74
	88.14	0.29	64.09		88.04	0.55	75.23
	79.13	0.29	50.6		91.51	0.63	65.82
	93.31	0.37	48.19		89.08	0.69	68.19
	92.12	0.34	63.85		88.3	0.7	82.32
	76.47	0.324	55.41		93.66	0.64	81.41
	74.68	0.32	54.14		93.22	0.57	65.31
	83.92	0.32	53.01		78.12	0.7	66.84
	77.79	0.324	55.23		78.46	0.69	76.06
	93.49	0.34	63.75		93.82	0.59	74.42
	81.86	0.29	47.71		80.02	0.68	82.03
	84.86	0.36	48.73		93.08	0.6	66.19
	92.11	0.3	47		84.2	0.67	81.6
	93.64	0.35	49.44		84.37	0.68	78.07
	79.63	0.29	61.57		84.14	0.63	64.17
	76.05	0.324	57.97		93.77	0.64	78.15
	93.71	0.374	48.29		76.59	0.65	74.61
	88.99	0.34	60.36		90.56	0.57	79.21
	76.16	0.354	48.38		93.6	0.68	68.25
	81.78	0.344	62.09		83.42	0.68	75.69
	90.41	0.31	60.68		93.07	0.68	82.96
	83.39	0.284	59.17		92.12	0.57	73.46
	85.05	0.34	61.6		86.88	0.63	68.35
	80.68	0.32	48.84		90.38	0.62	80.59
	88.53	0.32	63.78		93.65	0.65	76.42
	85.3	0.334	53.02		86.24	0.65	69.21
	87.07	0.34	57.69		93.25	0.64	81.15
	81.58	0.36	58.17		92.06	0.67	80.07
	76.09	0.324	53.84		88.46	0.57	76.53
	79.72	0.3	55.91		76.48	0.57	71.16
	83.46	0.364	52.95		92.18	0.66	66.66
	74.49	0.334	54.5		93.47	0.56	71.93
	90.48	0.33	47.21		92.99	0.57	64.87
	81.24	0.304	55.53		76.89	0.64	76.3
	82.63	0.29	55.86		80.95	0.58	76.04
	79.33	0.304	45.94		79.56	0.68	72.42
	87.87	0.354	48.59		88.78	0.6	77.74
	78.05	0.314	50.45		89.8	0.63	79.41
	88.28	0.314	48.18		81.87	0.6	71.5
	93.39	0.304	54.97		76.44	0.58	77.19
	86.36	0.3	54.96		79.36	0.69	79.85
	75.42	0.284	59.71		81.1	0.59	70.91
	93.55	0.324	64.51		80.31	0.68	71.67
	88.67	0.294	46.05		82.42	0.55	67.79
	90.92	0.274	59.29		84.85	0.69	69.05
	85.2	0.274	62.46		89.15	0.65	64.89
	89.38	0.344	59.53		92.33	0.63	73.64
	86.21	0.3	64.5		83.23	0.63	71.43
	81.77	0.284	47.83		94.67	0.58	67.76
	80.69	0.35	52.05		90.36	0.7	77.28
	87.61	0.38	53.59		85.68	0.62	82.37
	80	0.28	62.21		78.79	0.58	77.82
	85.87	0.274	45.13		83.92	0.56	67.12
	80.71	0.324	63.93		83.74	0.64	67.77
	77.13	0.354	55.07		82.93	0.57	74.47
	77.45	0.31	51.92		81.76	0.67	78.57
	92.66	0.354	58.07		92.6	0.7	69.96
	81.87	0.33	53.74		94.02	0.57	67
	77.39	0.36	52.43		89.94	0.63	75.94
	87.69	0.334	60.63		82.76	0.67	81.26
	86.23	0.284	50.73		87.64	0.59	67.46
	75.46	0.36	45.62		87.78	0.64	76.43
	83.99	0.374	60.6		77.8	0.57	77.03
	77.57	0.32	53.39		89.48	0.59	68.42
	92.05	0.304	58.57		77.8	0.6	81.07
	83.43	0.284	48.5		82.24	0.59	82.59
	76.25	0.35	62.79		94.42	0.56	69.24
	75.71	0.33	46.1		79.69	0.65	73.6
	78.43	0.324	49.64		94.55	0.57	69.04
	85.61	0.364	52.87		91.61	0.59	65.26
	86.92	0.33	56.24		82.94	0.69	77.17
	85.63	0.28	61.35		86.74	0.68	64.72
	78.36	0.284	62		89.38	0.59	69.88
	88.91	0.33	47.82		88.56	0.62	73.45
	83.19	0.344	54.67		89.44	0.57	70.28
	88.18	0.284	51.58		84.61	0.68	71.53
	93.37	0.33	61.28		77.24	0.55	70.57
	86.01	0.34	45.81		87.53	0.63	70.2
	82.5	0.314	51.59		93.92	0.66	66.09
	91.68	0.304	62.82		91.28	0.59	76.68
	80.66	0.34	52.78		82.41	0.68	68.1
	80.29	0.344	46.3		89.71	0.63	75.7
	77.09	0.284	45.4		92.84	0.61	69.08
	80.09	0.31	50.61		77.99	0.7	82.91
	75.42	0.334	63.08		90.58	0.67	74.76
	87.74	0.334	61.6		86.54	0.58	63.59
	77	0.31	53.91		82.11	0.67	71.32
	77.21	0.304	56.34		84	0.68	80.59
	87.38	0.364	58.15		86.21	0.64	75.84
	80.01	0.314	50.04		90.83	0.58	69.63
	93.58	0.364	55.87		94.52	0.62	78.07
	86.13	0.374	55.24		80.42	0.56	65.7
	87.03	0.36	58.31		90.1	0.63	79.25
	74.99	0.304	63		76.42	0.55	70.29
	84.76	0.324	56.78		91.8	0.59	75.24
	78.93	0.28	62.68		94.45	0.67	77.07
	89.03	0.32	51.46		88.04	0.62	82.34
	84.27	0.37	50.65		93.86	0.64	66.11
	79.36	0.314	51.2		94.17	0.6	82.17
	85.44	0.35	51.52		78.74	0.59	78.44
	77.5	0.324	52.3		79.46	0.66	72.26
	81.99	0.31	55.44		77.43	0.58	69.78
	88.6	0.3	52.15		80.1	0.56	64.22
	84.71	0.364	45.58		91.74	0.65	68.01
	80.92	0.38	52.43		91.17	0.7	80.72
	93.56	0.324	62.23		87.83	0.55	81.9
	76.31	0.31	61.36		79.49	0.67	73.99
	76.54	0.374	48.25		79.66	0.67	63.58
	86.31	0.35	47.33		91.08	0.61	75.94
	81.22	0.38	62.79		79.86	0.7	79.91
	76.52	0.37	61.47		89.07	0.66	81.64
	93.16	0.274	59.48		90.52	0.68	67.22
	75.29	0.35	46.75		79.98	0.58	71.65
	86.13	0.36	51.38		89.18	0.57	64.9
	82.89	0.29	53.36		80.39	0.59	82.56
	74.95	0.3	52.83		90.52	0.66	75.62
	84.89	0.31	55.66		90	0.62	80.64
	86.51	0.374	59.51		93.7	0.63	70.73
	91.9	0.284	61.71		87.58	0.7	75.18
	82.33	0.324	48.26		91.04	0.66	79.68
	89.58	0.36	62.25		94.77	0.66	68.64
	84.61	0.28	63.29		88.85	0.59	64.12
	76.78	0.344	50.59		82.52	0.65	73.15
	86.45	0.32	64.03		93.94	0.56	80.89
	91.45	0.304	52.75		90.2	0.69	68.68
	84.17	0.34	52.28		88.94	0.68	76.8
	91.57	0.274	58.69		89.23	0.66	72.27
	92.86	0.3	61.14		76.46	0.55	75.22
	93.71	0.32	46.11		80.03	0.59	68.87
	91.38	0.344	54		87.8	0.7	78.51
	88.75	0.34	49.24		86.2	0.64	78.64
	82.8	0.324	46.06		78.18	0.61	81.9
	92.18	0.3	64.85		80.67	0.66	81.46
	85.87	0.37	56		86.79	0.55	73.72
	86.27	0.354	52.7		78.21	0.68	73.46
	88.45	0.37	46.39		93.9	0.6	75.81
	85.86	0.284	62.13		88	0.63	71.84
	83.43	0.31	46.26		93.5	0.65	66.69
	81.01	0.33	60.14		91.03	0.65	81.84
	85.76	0.35	50.49		92.24	0.62	69.33
	76.84	0.37	49.09		77.8	0.65	75.23
	91.18	0.32	62.15		91.61	0.67	68.32
	92.86	0.34	53.99		87.4	0.63	80.16
	74.45	0.28	60.15		88.12	0.58	63.37
	84.13	0.274	46.87		82.13	0.68	74.89
	84.97	0.36	49.67		76.61	0.66	76.41
	79.31	0.28	50.17		82.02	0.63	80.07
	87.34	0.284	63.69		94.85	0.59	77.83
	89.19	0.314	47.41		79.43	0.66	70.83
	92.25	0.364	49.4		79.56	0.69	72.99
	87.97	0.36	54.9		82.88	0.63	78.29
	89.63	0.364	45.03		77.71	0.56	69.74
	87.5	0.354	54.49		88.83	0.7	64.42
	91.2	0.33	57.28		81.27	0.68	63.98
	79.1	0.364	48.43		82.05	0.62	73.8
	75.68	0.29	46.76		88.81	0.62	70.96
	77.99	0.364	57.2		83.98	0.56	80.16
	79.51	0.274	58.54		84.71	0.64	74.56
	84.65	0.314	47.03		76.6	0.6	73.5
	86.08	0.3	47.5		94.94	0.7	71.32
	75.23	0.28	60.75		84.85	0.64	81.65
	82.83	0.31	57.95		80.74	0.68	69.54
	78.16	0.274	55.32		81.68	0.68	68.39
	75.91	0.374	64.25		86.58	0.57	78.61
	79.7	0.31	51.07		78.32	0.57	77.95
	92.56	0.374	54.63		94.46	0.6	82.93
	86.38	0.32	60.85		90.63	0.55	75.74
	82.16	0.274	57.6		90.78	0.64	75.76
	74.82	0.38	51.41		87.01	0.69	70.4
	83.44	0.334	54.53		81.15	0.64	78.81
	90.54	0.284	50.79		86.43	0.63	80.67
	77.31	0.334	56.1		87.93	0.62	64.48
	85.3	0.37	64.8		81.72	0.57	66.26
	81.22	0.294	49.71		77.88	0.58	65.38
	76.12	0.314	61.03		83.35	0.59	71.54
	78.8	0.314	60.6		89.46	0.56	82.95
	79.59	0.36	57.7		81.33	0.64	63.22
	77.23	0.314	59.56		91.72	0.63	68.14
	77.47	0.32	52.92		90.84	0.69	76.96
	91.35	0.284	53.97		93.4	0.65	69.25
	84.45	0.34	63.76		90.05	0.57	64.6
	81.55	0.364	50.77		81.82	0.66	65.15
	85.45	0.38	62.16		93.35	0.65	64.63
	88.34	0.28	63.5		94.39	0.69	65.7
	82.39	0.344	52.08		78.55	0.57	72.13
	88.22	0.294	61.99		87.36	0.67	64.64
	75.45	0.334	45.61		94.62	0.66	66.07
	85.93	0.38	47.12		90.55	0.7	73.65
	86.78	0.29	51.63		88.1	0.67	71.66
	93.55	0.354	61.26		89.23	0.58	65.48
	87.04	0.34	46.48		83.98	0.57	81.02
	91.67	0.294	60.2		90.55	0.67	82.12
	91.57	0.354	58.56		83.96	0.64	67.69
	88.42	0.28	60.06		77.28	0.59	77.47
	86.36	0.28	60.51		77.44	0.68	68.81
	84.62	0.37	62.63		93.25	0.7	72.73
	78.54	0.35	63.23		77.61	0.69	76.69
	84.08	0.314	64.03		84.67	0.67	68.39
	86.72	0.36	50.84		90.02	0.58	69.65
	92.19	0.374	56.55		94.16	0.67	80.14
	88.2	0.32	48.03		85.91	0.7	70.77
	76.84	0.31	57.6		85.91	0.65	68.55
	89.45	0.284	57.92		82.22	0.56	68.92
	89.53	0.364	52.38		94.76	0.6	75.52
	92.01	0.344	46.76		88.23	0.67	77.85
	84.41	0.32	51.82		89.74	0.66	68.99
	91.72	0.35	45.28		82.98	0.56	71.6
	90.05	0.374	51.64		94.55	0.7	80.59
	88.28	0.38	62.27		87.31	0.56	79.5
	76.93	0.37	45.15		77.66	0.56	81.46
	83.13	0.284	64		77.36	0.63	68.9
	83.47	0.284	49.76		92.1	0.64	74.87
	85.62	0.374	57.16		78.03	0.6	72.19
	83.77	0.344	52.42		78.49	0.65	78.54
	83.36	0.33	49.89		83.38	0.66	73.38
	92.69	0.29	63.32		86.34	0.68	69.03
	78.07	0.284	64.93		78.1	0.66	81.77
	89.9	0.284	60.91		87.8	0.66	75.44
	80.23	0.32	48.23		89.96	0.66	66.01
	86	0.364	56.27		81.45	0.59	77
	82.18	0.294	58.33		94.31	0.63	69.98
	77.82	0.35	58.58		89.13	0.59	65.42
	76.64	0.32	61.67		83.77	0.56	68.71
	93.83	0.38	52.9		89.51	0.57	77.97
	90.27	0.334	54.9		78.39	0.7	69.17
	75.03	0.33	49.44		88.65	0.69	70.8
	74.7	0.304	51.03		88.23	0.6	78.49
	78.06	0.324	61.82		77.15	0.55	66.22
	81.99	0.374	54.2		92.72	0.64	77.06
	74.61	0.29	61.35		86.29	0.68	69
	89.76	0.324	56.01		85.26	0.67	63.72
	76.14	0.35	63.05		87.63	0.67	75.74
	90.73	0.33	56.2		78.48	0.69	70.42
	79.93	0.354	58.55		82.42	0.62	77.36
	76.74	0.32	53.24		76.55	0.63	63.01
	88.71	0.364	55.15		87.12	0.66	69.24
	90.58	0.29	58.25		76.38	0.57	72.74
	82.93	0.294	58.92		83.37	0.56	78.48
	81.93	0.34	45.76		91.67	0.59	74.16
	76.23	0.33	53.39		91.79	0.67	78.56
	81.13	0.31	63.35		78.3	0.64	76.59
	79.78	0.29	52.46		94.08	0.57	74.19
	75.27	0.294	47.95		94.78	0.58	69.44
	92.14	0.32	59.89		87.89	0.59	64.6
	85.16	0.31	57.2		89.42	0.64	76.21
	89.19	0.324	63.53		78.19	0.59	74.4
	87.45	0.354	48.5		81.09	0.56	73.71
	78.42	0.324	49.2		87.57	0.55	63.8
	84.46	0.334	60.23		93.44	0.62	63.26
	83.43	0.364	49.08		88.47	0.56	74.27
	75.47	0.334	48.28		82.25	0.66	73.62
	84.04	0.284	58.55		87.59	0.61	66.54
	79.79	0.364	63.77		90.82	0.69	81.75
	86.26	0.294	53.16		85.13	0.57	65.37
	88.33	0.284	58.66		76.53	0.66	65.52
	93.51	0.32	45.34		92.62	0.64	77.21
	76.29	0.32	63.9		77.07	0.62	75.28
	74.78	0.324	45.73		86.82	0.67	69.79
	77.12	0.35	61.25		88.1	0.65	77.07
	86.89	0.374	49.95		91.02	0.68	76.35
	89.82	0.36	47.67		84.68	0.68	82.51
	85.37	0.374	60.08		92.85	0.67	64.95
	86.03	0.354	46.5		85.79	0.66	72.22
	93.05	0.34	48.63		91.86	0.59	81.6
	86.22	0.29	51.57		80.2	0.66	75.81
	84.66	0.334	51.69		76.29	0.62	77.93
	87.24	0.344	46.11		85.44	0.69	82.35
	84.6	0.29	56.64		87.49	0.62	66.33
	79.43	0.284	63.23		78.48	0.57	69.7
	78.12	0.284	47.62		76.29	0.68	67.03
	90.68	0.314	57.25		91.68	0.65	77.99
	75.58	0.344	48.77		79.02	0.66	64.14
	81.49	0.324	51.24		79.82	0.59	75.42
	89.02	0.314	51.72		85.26	0.68	82.4
	92.55	0.37	54.4		93.13	0.61	73.75
	85.53	0.354	59.64		87.34	0.59	69.48
	82.38	0.37	48.28		80.64	0.67	80.49
	76.2	0.354	47.46		81.54	0.69	73.11
	77.4	0.32	46.45		91.36	0.63	68.84
	87.8	0.324	50.58		93.29	0.57	63.2
	91.29	0.32	49.48		79.64	0.63	82.93
	92.05	0.294	47.19		82.82	0.64	76.79
	79.26	0.364	56.05		82.05	0.59	67.48
	87.91	0.37	62.38		84.87	0.65	65.77
	88.69	0.3	61.22		80.58	0.7	80.35
	93.95	0.35	45.77		77.82	0.67	80.9
	79.73	0.364	46.61		83.19	0.6	79.82
	93.92	0.274	54.11		83.96	0.61	72.67
	91.05	0.32	54.8		85.75	0.63	72.08
	91.62	0.294	50.92		93.24	0.58	79.63
	84.67	0.354	48.93		77.17	0.66	81
	80.4	0.37	47.72		93.41	0.67	74.96
	92.44	0.29	51.43		84.24	0.62	81.23
	87.09	0.284	62.51		85.08	0.59	82.53
	81.94	0.334	54.9		93.45	0.63	73.3
	84.12	0.334	63.25		85.73	0.55	74.82
	76.17	0.334	48.98		87.29	0.68	76.25
	80.73	0.364	62.37		86.42	0.55	80.47
	80.3	0.33	46.11		89.65	0.62	80.18
	91.1	0.294	48.41		78.2	0.58	76.72
	78.3	0.344	62.18		94.01	0.57	77.96
	78.3	0.314	51.81		79.55	0.56	66.11
	74.55	0.314	61.81		83.43	0.67	69.73
	90.63	0.374	53.82		76.88	0.66	65.25
	77.8	0.354	47.04		94.92	0.64	78.3
	79.86	0.33	47.14		91.06	0.61	74.19
	87.16	0.334	52.09		89.15	0.58	68.35
	79.33	0.38	56.97		92	0.65	77.16
	89.01	0.36	54.16		84.72	0.69	74.26
	81.61	0.28	61.51		86.59	0.57	71.14
	89.64	0.28	59.99		93.15	0.63	73.56
	86.7	0.36	63.22		94.71	0.61	67.93
	89.86	0.294	45.66		79.67	0.59	80.68
	93.63	0.344	59.36		83.28	0.65	64.2
	85.74	0.28	59.34		84.06	0.57	82.33
	84.97	0.3	64.06		80.3	0.59	78.31
	82.59	0.33	54.83		81.63	0.69	79.49
	74.7	0.33	57.36		86.29	0.64	68.39
	91.34	0.334	60.49		76.94	0.58	82.55
	79.57	0.314	50.81		77.97	0.67	75.31
	84.78	0.364	55.33		94.84	0.56	72.48
	86.44	0.374	47.11		85.66	0.55	81.99
	93.77	0.38	48.63		84.91	0.55	82.55
	75.54	0.284	60.6		77.85	0.6	76.6
	82.2	0.354	48.04		81.96	0.59	81.79
	78.64	0.34	45.09		93.79	0.57	77.15
	76.57	0.294	57.96		87.56	0.64	68.87
	76.9	0.304	61.86		90.41	0.59	73.96
	84.42	0.36	46.15		93.87	0.57	63.78
	81.8	0.32	61.49		84.19	0.69	80.37
	83.05	0.29	54		84.6	0.66	71
	79.99	0.304	49.99		77.73	0.68	80.12
	78.82	0.32	47.09		78.79	0.66	63.06
	84.18	0.33	64.58		83.54	0.57	71.64
	78.75	0.31	50.74		78.59	0.7	77.55
	92.57	0.344	61.07		89.2	0.57	81.46
	80.46	0.314	47.02		80.61	0.6	77.26
	93.73	0.36	59.26		84.21	0.56	80.58
	79.31	0.304	45.19		90.86	0.64	64.29
	81.89	0.3	56.31		76.73	0.61	72.88
	94	0.334	63.67		93.4	0.65	79.06
	74.89	0.35	61.67		88.14	0.55	65.42
	86.33	0.31	49.01		78.04	0.7	69.89
	83.12	0.364	56.92		91.48	0.6	79.28
	91.1	0.344	48.23		88.42	0.61	76.12
	93.91	0.314	62.86		84.9	0.61	66.52
	87.93	0.3	48.35		87.32	0.64	77.9
	83.99	0.32	45.93		82.48	0.57	82.8
	86.26	0.344	49.73		83.29	0.66	64.66
	92.37	0.36	61.83		78.64	0.67	64.3
	77.79	0.284	57.02		88.86	0.69	70.99
	76.71	0.3	58.49		94.42	0.59	82.98
	89.23	0.38	48.61		83.1	0.63	73.4
	75.37	0.334	45.11		80.57	0.58	72.25
	78.68	0.37	51.76		83.38	0.68	67.16
	91.87	0.28	51.94		88.44	0.57	70.16
	88.57	0.314	46.11		79.01	0.7	77.9
	79.07	0.35	55.48		76.83	0.58	80.44
	93.01	0.314	61.75		80.06	0.67	77.43
	88.97	0.334	48.74		80.89	0.59	80.06
	85.87	0.374	55.07		93.66	0.57	76.35
	75.93	0.33	53.94		82.34	0.56	66.33
	91.83	0.334	63.9		77.05	0.66	80.89
	78.87	0.36	57.67		93.56	0.69	68.31
	77.91	0.33	56.2		82.44	0.64	72.74
	86.78	0.34	46.22		81.45	0.66	77.46
	78.29	0.304	46.25		89.77	0.62	78.15
	85.48	0.324	51.72		87.1	0.63	69.67
	87.57	0.3	54.68		85.12	0.61	76.21
	78.12	0.29	56.84		94.43	0.61	75.77
	78.42	0.36	54.59		90.1	0.56	72.83
	82.69	0.334	63.29		80.19	0.55	70.78
	76.82	0.33	50.23		78.24	0.57	79.28
	87.6	0.344	53		77.21	0.55	70.18
	83.14	0.334	49.43		83.9	0.56	75.06
	75.32	0.33	48.1		78.82	0.64	71.04
	78.77	0.274	50.01		80.72	0.61	77.13
	76.46	0.314	63.19		89.54	0.67	82.4
	79.65	0.324	45.74		79.46	0.65	71.63
	83.58	0.294	48.32		76.75	0.67	81.55
	88.07	0.314	56.77		80.12	0.68	68.97
	75.53	0.35	56.53		94.31	0.64	79.27
	82.47	0.36	55.38		89.4	0.63	67.52
	78.16	0.314	60.7		85.26	0.65	63.03
	84.34	0.314	59.17		88	0.64	65.83
	87.67	0.304	58.21		80.38	0.69	82.46
	87.33	0.32	58.12		82.59	0.69	64.95
	79.31	0.284	61.35		92.69	0.69	65.17
	78.14	0.29	48.7		82.74	0.6	74.66
	86.74	0.294	60.39		83.5	0.61	72.97
	92.25	0.3	45.22		88.01	0.59	63.83
	87.73	0.364	49.16		82	0.59	73.87
	82.6	0.314	49.46		82.22	0.58	68.07
	84.28	0.294	46.18		80.6	0.63	75.85
	83.66	0.364	54.13		93.07	0.55	80.88
	74.52	0.37	46.3		94.67	0.61	76.87
	90.21	0.344	46.35		81.51	0.68	80.09
	76.67	0.314	54.36		82.59	0.57	71.61
	83.96	0.354	64.01		91.86	0.56	67.44
	85.07	0.314	54.35		77.82	0.56	67.07
	83.4	0.34	50.09		91.87	0.65	72.09
	93.36	0.29	54.74		83.33	0.6	80.77
	83.54	0.304	49.84		91.51	0.65	64.38
	88.89	0.334	49.39		84.34	0.55	75.45
	89.14	0.314	50.81		79.91	0.59	73.99
	93.25	0.324	52.1		94.19	0.58	69.33
	76.74	0.294	58.17		78.04	0.59	73.38
	89.21	0.334	56.11		88.52	0.7	66.82
	92.04	0.37	63.95		77.66	0.58	70.33
	77.16	0.324	49.15		87.08	0.64	75.41
	88.06	0.28	51.6		93.38	0.55	80.67
	90.43	0.294	51.36		86.41	0.69	82.87
	76.93	0.324	51.56		85.21	0.6	67.32
	76.1	0.32	63		83.65	0.65	76.81
	84.26	0.314	46.96		89.62	0.55	74.88
	85.96	0.284	54.09		80.71	0.66	66.42
	74.49	0.284	63.21		78.42	0.6	75.91
	76.42	0.274	55.02		79.29	0.7	67.33
	75.54	0.314	63.46		91.64	0.58	76.37
	76.03	0.344	63.24		82.38	0.68	69.01
	78.34	0.284	52.09		90.48	0.63	68.81
	74.97	0.374	53.11		92.92	0.65	79.85
	77.43	0.28	50.19		80.58	0.66	81.12
	88.34	0.29	50.87		91.26	0.65	73.63
	92.52	0.37	59.51		85.97	0.67	70.48
	88.98	0.314	46.96		92.61	0.59	73.63
	76.21	0.354	53.47		93.12	0.67	65.35
	90.15	0.35	61.09		87.74	0.58	77.27
	81.79	0.374	51.17		94.83	0.63	65.06
	85.62	0.29	47.12		94.95	0.61	69.39
	76.11	0.36	56.63		82.15	0.58	68.84
	81.39	0.37	56.17		92.08	0.63	68.42
	91.77	0.324	60.97		87.89	0.57	80.57
	76.69	0.31	61.16		90.89	0.62	66.83
	85.93	0.314	50.95		87.51	0.59	71.07
	91.93	0.324	61.7		91.59	0.69	65.25
	74.82	0.32	64.73		81.2	0.6	76.29
	79.61	0.32	56.23		89.91	0.64	82.89
	74.73	0.31	57.47		92.59	0.68	76.13
	91.84	0.294	53.57		93.95	0.61	81.8
	89.55	0.304	56.99		94.34	0.6	73.43
	87.44	0.334	49.3		82.13	0.68	66.88
	91.02	0.33	45.84		90.19	0.6	65.1
	91.72	0.334	63.75		84.93	0.64	68.8
	85.63	0.29	45.95		81.81	0.63	63.85
	86.41	0.284	50.5		83.86	0.61	73.93
	75.26	0.314	60.04		78.41	0.59	75.23
	76.02	0.374	64.34		80.01	0.68	70.16
	86.48	0.314	60.18		85.53	0.56	81.85
	82.37	0.374	63.78		79.86	0.65	78.96
	75.25	0.324	64.76		85.96	0.57	77.47
	88	0.284	47.23		91.35	0.57	63.02
	91.25	0.294	51.76		86.29	0.69	66.18
	83.68	0.35	58.9		86.51	0.56	66.1
	86.49	0.334	49.99		93.94	0.66	69.14
	78.08	0.34	52.13		89.74	0.57	72.79
	80.35	0.374	59.47		85.89	0.59	75.14
	87.04	0.324	48.22		83.28	0.62	73.17
	93.89	0.354	59.2		77.1	0.61	68.41
	85.46	0.37	57.42		77.5	0.56	67.44
	88.52	0.274	48.45		80.16	0.63	76.9
	91.46	0.36	59.35		89.07	0.67	67.22
	87.55	0.284	58.21		86.87	0.58	76.39
	79.71	0.344	59.58		76.38	0.6	79.05
	84.47	0.284	58.56		86.03	0.69	69.42
	93.98	0.33	57.3		79.18	0.59	70.85
	91.63	0.29	52.87		82.77	0.69	74.99
	86.04	0.35	54.45		77.8	0.69	69.92
	74.76	0.364	49.36		80.36	0.7	73.49
	91.23	0.374	52.04		76.9	0.67	71.47
	76.91	0.38	64.01		77.35	0.67	70.34
	85.36	0.37	52.49		78.93	0.65	76.79
	92.11	0.29	64.97		80.84	0.55	70.61
	76.65	0.31	60.84		86.03	0.67	63.9
	89.89	0.28	59.92		79.98	0.59	73.31
	80.11	0.294	60.82		92.26	0.64	75.7
	88.03	0.324	54.35		93	0.63	77.78
	79.34	0.334	54.49		91	0.69	72.75
	83.19	0.294	48.62		77.57	0.6	77.32
	88.72	0.314	59.35		90.4	0.58	67.81
	79.34	0.33	55.28		81.15	0.67	69.04
	81.57	0.354	53.69		81.74	0.55	68.37
	83	0.314	60.49		88.67	0.65	68.59
	91.96	0.284	61.92		81.86	0.57	75.38
	87.42	0.304	52.06		93.52	0.58	74.93
	79.87	0.324	47.17		86.16	0.64	69.98
	75.76	0.28	62.67		92.61	0.65	76.29
	92.94	0.284	58.41		85.69	0.56	81.39
	89.96	0.37	60.54		91.61	0.62	66.98
	84.64	0.274	45.1		87.76	0.68	65.25
	82.87	0.31	45.78		80.11	0.7	67.52
	80.88	0.35	51.96		82.74	0.69	70.83
	87.59	0.374	64.77		94.11	0.55	65.81
	77.88	0.294	46.32		88.56	0.59	64.2
	79.1	0.334	62.87		77.68	0.69	64.31
	90.33	0.32	58.97		93.74	0.56	70.11
	83.11	0.334	49.96		93.66	0.6	74.89
	81.89	0.354	46.1		81.19	0.59	64.58
	86.46	0.364	46.12		79.51	0.62	67.69
	79.43	0.374	47.68		81.82	0.67	72.87
	79.32	0.35	61.08		94.71	0.66	77.55
	90.45	0.324	62.86		80.7	0.64	70.31
	79.56	0.304	54.69		93.52	0.59	73.09
	83.68	0.284	59.4		86.62	0.7	69.81
	89.8	0.324	56.87		79.96	0.63	81.24
	75.49	0.34	54.83		84.64	0.58	69.22
	88.77	0.32	58.63		94.38	0.59	71.9
	83.5	0.304	57.13		83.47	0.62	67.84
	74.79	0.3	64.92		81.54	0.61	66.71
	78.68	0.33	55.66		88.09	0.69	74
	84.46	0.38	47.42		92.56	0.62	77.16
	87.86	0.32	55.63		86.75	0.6	69.88
	87.28	0.344	45.82		92.01	0.62	73.09
	88.84	0.28	51.55		90.9	0.64	71.61
	85.78	0.32	56.75		93.49	0.66	63.93
	79.47	0.334	60.86		76.5	0.68	78.48
	82.2	0.29	49.98		78.75	0.6	82.19
	89.55	0.294	62.25		85.45	0.57	72.71
	82.3	0.31	50.15		85.67	0.7	67.69
	88.57	0.324	56.61		81.97	0.64	79.65
	82.1	0.294	49.29		78.8	0.55	63.88
	74.99	0.294	49.21		89.74	0.59	64.35
	74.43	0.37	64.23		84.08	0.62	77.36
	82.49	0.38	46.43		86.16	0.57	76.32
	77.59	0.294	60.87		77.57	0.56	82.13
	82.3	0.284	63.57		94.84	0.66	75.23
	92.16	0.354	63.28		94.8	0.66	75.1
	78.42	0.33	57.13		87.72	0.69	76.95
	76.39	0.35	56.89		88.21	0.58	76.67
	75.18	0.284	59.24		84.61	0.6	68.37
	93.31	0.364	57.25		86.91	0.59	70.74
	93.76	0.324	59.74		88.34	0.64	64.41
	92.37	0.3	59.35		84.53	0.59	72.01
	88.81	0.31	47.49		94.72	0.63	73.65
	81.38	0.29	53.95		91.71	0.67	73.38
	78.14	0.344	53.27		83.97	0.62	67.53
	86.88	0.334	55.52		76.79	0.68	67.77
	79.68	0.294	46.24		92.27	0.55	80.59
	75.12	0.35	61.65		82.6	0.61	65.22
	85.45	0.334	63.08		79.8	0.57	80.78
	81.07	0.344	59.88		92.98	0.58	75.45
	78.08	0.324	61.01		91.58	0.63	74.94
	92.48	0.364	50.32		93.87	0.67	80.33
	79.41	0.35	59.54		90.48	0.57	66.98
	80.06	0.31	56.41		88.39	0.62	66.54
	86.21	0.37	62.84		91.74	0.6	69.56
	81.07	0.28	62.51		91.39	0.56	72.5
	80.36	0.314	50.21		91.88	0.68	64.54
	89.01	0.33	54.14		79.21	0.6	66.58
	78.82	0.364	49.39		92.93	0.62	75.22
	84.99	0.37	50.65		85.12	0.56	67.23
	86.92	0.34	50.04		88.99	0.68	74.99
	80.88	0.354	55.65		88	0.63	70.61
	86.35	0.35	58.07		90.21	0.69	67.81
	75.64	0.374	46.83		83.27	0.55	72.4
	80.12	0.32	55.51		86.61	0.61	63.56
	77.92	0.284	56.43		84.87	0.6	70.07
	79.47	0.35	56.12		81.46	0.61	80.21
	90.75	0.34	53.93		77.12	0.55	78.49
	92.52	0.32	61.17		94.75	0.62	63.58
	75.59	0.31	48.04		82.6	0.6	78.76
	84.41	0.38	57.9		77.57	0.68	78.65
	81.3	0.34	45.01		83.99	0.64	73.3
	76.96	0.3	51.97		86.47	0.61	68.64
	90.59	0.35	50.81		77.96	0.56	71.03
	85.47	0.294	47.48		90.65	0.66	69.13
	81.61	0.35	57.69		79.63	0.62	66.17
	92.14	0.284	54.27		79.07	0.61	66.62
	89.26	0.304	46.37		87.45	0.62	65.96
	81.77	0.374	51.38		85.94	0.57	69.17
	93.97	0.284	59.66		79.03	0.64	68.27
	75.36	0.31	59.96		90.71	0.67	77.9
	83.4	0.304	63.68		82.62	0.57	79.41
	86.92	0.36	54.86		87.59	0.59	77.26
	79.58	0.32	47.93		84.52	0.57	68.26
	89.38	0.32	49.2		92.61	0.68	81.82
	81.08	0.364	56.89		88.08	0.57	69.97
	76.13	0.28	56.15		88.03	0.68	79.58
	87.26	0.37	60.54		90.65	0.62	74.91
	87.83	0.354	49.58		93.47	0.6	74.11
	76.22	0.36	57.7		83.1	0.62	79.52
	77.52	0.344	55.51		82.43	0.63	74.69
	85.67	0.34	45.4		82.88	0.65	72.33
	80.66	0.354	49.22		84.62	0.65	67.72
	90.64	0.324	56.53		92.09	0.63	82.3
	89.44	0.32	54.55		81.68	0.6	68.89
	79.74	0.284	45.17		94.07	0.57	69.4
	85.89	0.34	60.19		91.72	0.67	76.32
	89.18	0.38	59.34		87.08	0.62	76.25
	82.19	0.354	50.86		94.3	0.67	77.32
	81.08	0.32	61.17		83.59	0.64	81.19
	90.91	0.294	52.71		86.77	0.56	63.26
	75.35	0.3	60.69		93.87	0.63	65.83
	86.95	0.334	62.06		89.81	0.65	64.35
	85.74	0.324	60.72		89.19	0.55	75.93
	76.95	0.304	59.52		79.18	0.6	68.2
	74.44	0.35	52.12		81.25	0.62	64.93
	81.4	0.334	55.27		85.77	0.59	73.8
	80.13	0.294	46.44		83.32	0.58	63.16
	93.99	0.35	50.8		80.15	0.58	71.67
	83.72	0.324	59.19		78.5	0.69	79.87
	79.38	0.344	49.78		88.34	0.59	66.05
	88.14	0.304	60.42		81.14	0.66	78.18
	83.99	0.32	57.44		89.85	0.66	82.08
	84.2	0.314	49.16		94.81	0.68	64.21
	76.85	0.304	55.58		90.89	0.7	65.67
	83.67	0.3	48.88		86.42	0.68	77.2
	80.36	0.29	57.27		87.66	0.58	75.95
	74.47	0.374	50.85		91.22	0.61	77.59
	87.75	0.34	47.04		83.43	0.68	77.37
	93.7	0.314	52.45		83.24	0.67	64.65
	88	0.284	58.49		83.84	0.62	65.23
	77.99	0.28	53.77		85.68	0.58	74.12
	77.87	0.35	55.93		87.82	0.63	77.68
	92.64	0.284	47.87		82.86	0.64	63.31
	82.95	0.354	53.21		78.72	0.56	82.17
	86.64	0.374	62.12		82.17	0.57	77.31
	81.1	0.334	50.99		80	0.64	73.36
	77.6	0.28	50.67		85.07	0.62	75.53
	88.46	0.3	53.39		92.98	0.6	75.06
	93.98	0.334	61.72		79.4	0.67	81.32
	74.63	0.37	55.34		86.7	0.67	81.91
	76.03	0.314	49.03		86.77	0.66	70.52
	78.58	0.38	55.71		90.77	0.56	74.26
	79.26	0.35	45.55		91.69	0.58	76.3
	74.96	0.304	62.61		88.45	0.63	81.42
	89.53	0.31	56.72		82.18	0.62	73.87
	84.39	0.3	46.54		94.61	0.57	71.44
	91.15	0.37	64.93		90.83	0.7	78.64
	79.42	0.29	63.3		79.43	0.64	82.9
	88.45	0.364	47.1		90.38	0.69	68.64
	88.88	0.314	51.93		90.81	0.55	74.11
	87.42	0.31	63.6		94.12	0.67	73.99
	80.09	0.304	60.09		79.96	0.66	69.43
	87.66	0.274	60.74		76.29	0.63	69.42
	87.89	0.28	47.36		93.2	0.62	78.33
	93.74	0.37	61.26		93.72	0.66	66.04
	84.89	0.36	62.33		90.92	0.66	63.83
	89.27	0.294	46.77		80.92	0.63	69.7
	92.27	0.33	52.84		77.57	0.65	69.61
	77.36	0.28	51.9		88.38	0.67	77.17
	77.79	0.334	47.21		90.67	0.6	69.22
	92.52	0.35	58.77		78.24	0.58	77.6
	85.67	0.284	48.71		79.79	0.68	81.44
	92.55	0.29	49.45		87.71	0.68	74.75
	88.59	0.3	50.53		86.87	0.55	71.39
	86.17	0.36	59.91		93.95	0.57	77.13
	84.22	0.374	64.66		83.14	0.55	72.4
	82.86	0.33	56.77		84.3	0.62	75.64
	80.06	0.364	59.39		91.62	0.57	70.06
	81.59	0.36	49.57		93.29	0.7	80.3
	80.67	0.294	51.93		78.4	0.61	76.12
	75.32	0.3	45.92		82.77	0.61	71.7
	84.59	0.354	45.86		78.42	0.68	75.6
	80.14	0.374	48.14		84.91	0.55	75.38
	86.51	0.3	53.75		93.86	0.58	73.77
	91.05	0.294	45.56		90.59	0.66	77.46
	82.14	0.374	55.12		84.63	0.62	63.56
	77.84	0.284	56.76		92.69	0.56	82
	75.26	0.294	54.98		89.38	0.66	74.02
	92.24	0.3	61.58		85.81	0.58	67.92
	82.89	0.35	59.66		81.23	0.66	70.21
	91.87	0.304	61.07		81.16	0.62	81.78
	78.2	0.35	49.82		86.67	0.55	64.99
	86.48	0.364	48.75		84.06	0.62	75.86
	85.08	0.32	64.71		80.44	0.68	76.17
	75.63	0.32	54.57		85.41	0.56	76.53
	93.07	0.314	62.35		83.26	0.68	76.72
	92.07	0.35	58.44		76.64	0.63	74.11
	77.79	0.324	52		81.62	0.64	80.77
	74.45	0.35	45.55		78.65	0.61	66.85
	82.58	0.32	46.03		83.96	0.62	69.1
	93.79	0.344	63.75		94.12	0.64	72.5
	83.04	0.304	61.58		87.2	0.55	78.92
	88.04	0.294	52.48		86.63	0.59	71.01
	88.04	0.374	64.14		93.96	0.63	64.64
	93.22	0.364	63.32		82.95	0.68	63.85
	74.92	0.33	56.57		79.51	0.56	75.93
	82.58	0.31	64.36		93.12	0.56	64.41
	80.83	0.3	48.04		89.82	0.67	75.76
	89.31	0.35	60.79		89.73	0.57	73.16
	76.99	0.32	56.2		83.27	0.58	70.25
	78.54	0.29	64.45		83.13	0.63	67.3
	78.08	0.354	62.79		79.57	0.65	77.17
	84.87	0.334	49.97		88.82	0.6	76.08
	93.56	0.34	61.75		90.06	0.62	72.28
	90.51	0.354	52.87		76.29	0.68	68.76
	90.6	0.314	60.86		77.88	0.62	79.97
	82.31	0.344	55.34		92.86	0.61	64.51
	77.56	0.3	52.35		85.22	0.56	68.05
	82.32	0.354	63.13		94.54	0.57	68.25
	75.76	0.33	59.75		85.09	0.58	69.47
	76.66	0.304	46.93		81.69	0.58	82.37
	75.83	0.324	62.45		89.58	0.61	64.25
	86.06	0.32	50.79		87.4	0.56	74.66
	77.26	0.364	47.61		86.02	0.67	63.78
	76.87	0.29	46.58		89.82	0.63	71.15
	75.71	0.364	51.4		84.16	0.7	76.48
	77.95	0.354	49.76		91.71	0.65	64.35
	91.78	0.3	50.59		83.33	0.69	81.69
	91.99	0.37	52.42		81.01	0.65	65.47
	92.68	0.33	61.59		92	0.69	79.12
	85.01	0.37	56		79.11	0.64	66.39
	81.61	0.294	47.25		88.37	0.69	73.73
	84.28	0.37	61.42		81.59	0.57	64.4
	92.04	0.32	61.81		78.33	0.59	66.92
	90.28	0.34	54.37		89.23	0.69	71.34
	87.27	0.374	50.83		93	0.56	66.65
	93.17	0.38	49.86		84.06	0.55	70.77
	77.81	0.35	46.31		94.16	0.62	77.38
	86.78	0.294	52.51		92.68	0.56	73.84
	74.45	0.36	45.25		90.4	0.69	68.33
	75.09	0.28	45.92		83.5	0.6	75.1
	87.81	0.314	61.13		88.27	0.66	77.92
	92.16	0.324	46.6		86.96	0.56	69.24
	88.73	0.344	58.4		93.67	0.6	73.37
	83.93	0.364	45.38		89.87	0.68	72.82
	79.71	0.324	48.36		81.71	0.61	80.13
	83.11	0.314	51.04		81.14	0.57	74.27
	90.59	0.3	64.1		76.87	0.69	78.68
	88.42	0.34	49.85		80.06	0.62	66.97
	77.11	0.314	61.21		89.76	0.61	76.98
	86.63	0.374	49.47		93.83	0.67	68.13
	79.98	0.314	59.55		83.45	0.63	70.73
	85.04	0.28	52.25		76.63	0.58	81.39
	79.53	0.3	52.63		82.39	0.64	79.48
	87	0.29	51.51		81.09	0.59	74.82
	83.81	0.36	45.89		81.18	0.7	67.02
	81.31	0.374	59.01		80.56	0.62	74.62
	90.67	0.34	56.26		86.27	0.66	65.43
	83.66	0.36	57.62		81.66	0.66	63.13
	76.31	0.32	57.63		88.84	0.65	64.58
	81.57	0.324	63.86		78.36	0.59	75.48
	74.95	0.354	47.27		79.27	0.59	77.76
	82.86	0.37	53.47		81.43	0.57	75.89
	78.93	0.304	46.83		87.78	0.55	80.22
	92.8	0.304	51.33		76.44	0.65	64.25
	88.9	0.334	59.35		81.26	0.65	73.23
	88.33	0.34	46.66		93.01	0.57	76.15
	82.98	0.304	46.04		83.48	0.68	81.78
	76.57	0.32	54.06		80.31	0.57	71.92
	89.72	0.294	49.8		86.92	0.6	70.58
	89.93	0.31	45.11		87.78	0.69	65.15
	90.52	0.33	52.2		78.32	0.69	79.02
	87.79	0.294	55.29		78.11	0.57	68.5
	79.53	0.36	56.07		91.73	0.57	73.92
	82.4	0.304	59.31		93.3	0.6	75.72
	82.73	0.29	63.41		88.88	0.62	67.83
	89.42	0.3	57.21		89.74	0.57	73.76
	80.64	0.374	57.86		78.94	0.56	78.74
	90.3	0.31	53.15		93.21	0.6	64.59
	91.61	0.294	45.55		77.97	0.56	73.25
	92.67	0.344	48.17		92.92	0.64	64.12
	77.06	0.314	58.95		86.92	0.59	68.93
	90.28	0.364	54.6		83.5	0.66	63.63
	78.14	0.34	57.55		82.59	0.64	67.1
	80.66	0.38	61.75		91.91	0.65	65.91
	80.12	0.294	61.4		94.31	0.56	65.95
	75.19	0.31	55.66		80.06	0.61	79.99
	76.58	0.324	59.45		76.72	0.69	64.71
	90.13	0.304	50.64		80.09	0.56	72.76
	81.65	0.35	47.29		82.46	0.56	67.12
	93.38	0.36	64.25		79.46	0.7	73.06
	75.43	0.35	50.89		82.61	0.68	66.54
	90.97	0.304	50.32		89.43	0.55	65.35
	92.91	0.28	64.58		76.91	0.66	75.34
	79.37	0.314	51.29		78.47	0.69	71.71
	93.82	0.374	50.86		84.45	0.7	75.65
	79.38	0.364	50.57		84.72	0.63	78.73
	93.3	0.294	53.47		79	0.61	67.31
	85.94	0.284	55.51		89.76	0.62	82.22
	78.8	0.3	62.04		87.63	0.59	79.04
	85.06	0.36	64.92		76.8	0.61	75.44
	79.51	0.29	58.34		92.09	0.59	79.75
	92.41	0.33	53.51		82.75	0.61	78.57
	86.1	0.35	55.82		89.39	0.58	72.06
	79.78	0.33	61.59		84.94	0.6	71.58
	76.44	0.3	60.08		87.33	0.61	63.4
	92.91	0.36	45.62		94.57	0.59	66.81
	74.79	0.31	52.05		89.18	0.63	64.93
	77.22	0.38	52.55		77.76	0.64	70.75
	87.22	0.374	49.02		80.37	0.56	63.26
	88.89	0.324	63.76		85.95	0.55	74.52
	76.9	0.34	49.91		90.53	0.61	64.15
	83.17	0.314	52.8		87.55	0.56	76.67
	75.13	0.34	47.8		81.77	0.63	74.27
	84.42	0.294	56.52		93.54	0.56	65.82
	75.88	0.324	47.86		77.54	0.58	66.86
	75.04	0.284	58.18		80.61	0.57	67.17
	74.58	0.38	45.03		83.73	0.57	76.24
	88.17	0.38	56.17		83.18	0.67	64.85
	90.38	0.35	61.54		81.25	0.58	72.71
	80.03	0.34	61.65		82.63	0.57	82.15
	81.05	0.3	58.45		94.51	0.64	65.87
	79.35	0.364	64.43		94.7	0.57	69.32
	76.14	0.28	45.18		91.3	0.61	79.09
	84.76	0.32	55.8		94.98	0.66	77.03
	87.66	0.294	47.12		89.88	0.65	77.9
	91.4	0.344	47.36		93.43	0.55	67.19
	84.19	0.324	62.5		89.11	0.58	79.74
	88.77	0.32	54.1		93.96	0.58	70.01
	81.86	0.28	50.81		84.27	0.56	63.21
	84.05	0.32	62.99		87.87	0.68	76.59
	93.18	0.364	61.51		79.57	0.56	79.08
	86.43	0.314	55.51		76.58	0.69	69.08
	83.1	0.34	54.7		85.48	0.61	72
	90.07	0.294	52.81		76.28	0.59	66.81
	88.29	0.28	55.16		91.62	0.56	75.7
	76.89	0.364	57.34		90.15	0.55	81.29
	76.68	0.31	54.86		88.33	0.64	72.03
	89.31	0.3	46.91		83.08	0.63	79.44
	87.66	0.37	46.95		83.89	0.58	68.53
	88.46	0.294	58.01		77.6	0.66	82.46
	85.53	0.324	61.91		91.08	0.56	76.47
	79.41	0.374	52.61		82.44	0.56	78.51
	80.71	0.294	51.42		77.22	0.64	77.22
	85.19	0.274	45.02		87.93	0.66	64.37
	93.19	0.354	50.96		76.5	0.68	73.11
	82.03	0.344	50.94		92.47	0.68	79.11
	90.32	0.304	50.27		93.21	0.7	64.77
	83.84	0.33	54.65		93.84	0.58	77.42
	79.81	0.32	45.52		77.81	0.57	63.45
	79.66	0.33	64.44		90.3	0.64	66.26
	75.18	0.364	63.31		93.24	0.69	75.97
	76.95	0.31	52.85		78.41	0.7	63.81
	84.86	0.29	46.13		93.77	0.63	82.24
	80.19	0.29	57.51		89.2	0.67	75.14
	81.42	0.314	62.7		79.29	0.59	73.86
	85.18	0.29	60.55		85.03	0.6	63.93
	84.69	0.364	61.35		83.98	0.57	80.71
	74.9	0.37	58.6		92.46	0.63	75.01
	93.6	0.344	50.69		77.26	0.56	74.86
	91.56	0.324	64.26		90.88	0.7	81.3
	75.86	0.31	45.28		87.61	0.55	73.84
	82.67	0.32	53.55		91.27	0.58	79.31
	92.49	0.35	53.11		77.13	0.55	65.04
	79.84	0.294	53.08		80.76	0.69	64.67
	81.74	0.314	56.9		83.33	0.69	63.52
	74.65	0.294	47.15		86.67	0.62	69.66
	93.04	0.28	54.99		88.99	0.59	73.67
	88.18	0.36	56.98		81.04	0.64	69.97
	75.54	0.3	57.07		81.12	0.56	67.42
	78.82	0.294	46.25		88	0.57	77.75
	93.32	0.37	55.76		87.64	0.62	72.89
	81.37	0.314	48.33		86.56	0.62	75.44
	84.13	0.324	60.33		77.43	0.57	70.59
	91.19	0.29	51.16		83.91	0.61	70.11
	88.89	0.3	47.45		93.6	0.7	72.85
	82.88	0.284	59.99		76.32	0.67	69.4
	86.22	0.284	48.59		81.67	0.56	72.12
	85.32	0.29	55.51		80.02	0.56	71.48
	77.96	0.344	64.34		77.97	0.58	72.67
	76.33	0.33	52.08		88.76	0.58	73.17
	75.16	0.294	51.11		81.91	0.64	71.75
	86.02	0.32	47.27		84.64	0.6	78.52
	84.92	0.364	51.07		88.6	0.64	79.93
	77.57	0.36	60.2		94.35	0.67	74.77
	88.33	0.37	50.82		79.97	0.6	80.09
	85.31	0.3	55.13		78.23	0.63	75.33
	90.95	0.304	46.29		94.2	0.59	78.54
	81.24	0.304	62.28		79.51	0.59	74.66
	80.46	0.28	47.9		80.55	0.58	81.73
	82.83	0.324	45.27		76.7	0.7	67.31
	75.11	0.33	46.17		93.08	0.65	78.45
	84.63	0.284	64.48		93.57	0.57	80.12
	88.54	0.354	52.11		84.17	0.62	80.14
	79.56	0.294	54.84		94.13	0.68	70.89
	75.12	0.32	48.79		80.44	0.67	77.65
	92.39	0.34	51.42		91.56	0.55	72.91
	81.87	0.294	58.24		80.3	0.62	80.09
	89.81	0.294	53.99		84.96	0.6	69.47
	91.71	0.28	57.73		93.28	0.59	67.94
	93.04	0.374	52.72		88.06	0.58	82.25
	83.72	0.34	58.84		76.35	0.69	81.17
	78.52	0.354	54.09		80.07	0.66	79
	77.04	0.35	47.35		84.57	0.62	82.08
	88.21	0.334	51.94		92.8	0.59	77.81
	75.61	0.354	58.32		80.76	0.6	81.76
	88.2	0.374	57.44		81.83	0.55	76.75
	85.96	0.284	53.06		87.82	0.66	67.89
	78.32	0.364	52.45		81.65	0.55	80.79
	74.91	0.344	60.4		94.94	0.55	65.12
	83.06	0.364	50.9		94.37	0.64	64.68
	76.41	0.374	57.77		77.72	0.65	81.75
	86.1	0.29	49.47		85.77	0.69	77.95
	84.21	0.374	63.13		76.77	0.68	71.15
	75.93	0.36	49.86		81.43	0.7	69.81
	91.28	0.28	54.49		79.93	0.55	81.37
	89.96	0.29	58.74		90.84	0.65	74.35
	92.08	0.364	58.62		77.47	0.66	82.37
	88.58	0.294	58.59		84.57	0.61	78.75
	92.96	0.33	49.73		87.66	0.63	66.23
	82.28	0.3	63.71		84.7	0.61	70.99
	75.04	0.28	64.97		89.01	0.58	74
	85.26	0.294	47.22		79.61	0.62	76.72
	83.1	0.344	52.64		84.43	0.6	64.05
	88.71	0.36	63.5		77.87	0.56	75.56
	76.86	0.284	56.99		92.88	0.62	71.31
	92.26	0.354	61.35		83.88	0.62	68.79
	90.12	0.274	49.51		92.87	0.64	63.68
	75.08	0.28	48.96		88.93	0.7	72.61
	79.59	0.334	64.72		91.7	0.68	80.31
	81.47	0.304	50.27		87.5	0.6	79.71
	84.65	0.314	45.9		83.3	0.69	73.55
	89.56	0.294	63.59		77.86	0.56	76.31
	74.46	0.364	48.21		76.83	0.56	72.55
	85.77	0.34	50.08		87.22	0.64	69.75
	92.07	0.32	56.08		89.83	0.7	70.87
	90.12	0.314	63.71		94.12	0.7	78.02
	90.5	0.29	47.16		90.58	0.64	63.04
	79.31	0.354	47.33		84.47	0.58	67.09
	78.74	0.34	47.23		77.98	0.58	70.99
	84.35	0.274	48.64		83.79	0.65	65.12
	86.78	0.304	47.21		84.74	0.68	65.73
	91.5	0.29	58.69		94.58	0.66	67.39
	85.16	0.294	51.63		78.08	0.56	68.76
	84.87	0.334	59.08		80.89	0.64	69.11
	80.88	0.284	54.75		94.79	0.62	74.32
	84.24	0.3	49.36		86.31	0.62	81.96
	93.96	0.294	57.49		77.46	0.6	73.45
	89.51	0.324	59.94		76.39	0.57	76.12
	80.09	0.334	58.95		83.48	0.55	67.31
	76.95	0.29	57.05		83.67	0.67	72.73
	89.16	0.354	55.57		80.93	0.61	65.6
	81.06	0.294	60.01		78.58	0.68	63.27
	84.52	0.304	49.39		80.88	0.62	78.25
	80.74	0.35	46.15		84.65	0.57	72.56
	90.14	0.344	48.54		77.02	0.68	66.65
	91.94	0.32	49.32		90.99	0.66	76.75
	88.28	0.284	60.14		80.07	0.64	73.72
	89.5	0.294	48.01		94.46	0.6	64.29
	86.09	0.364	55.56		94.77	0.63	63.31
	81.33	0.314	61.07		91.2	0.6	71.92
	84.06	0.344	60.36		84.31	0.69	72.28
	79.28	0.304	53.24		88.56	0.59	76.39
	80.12	0.31	48.02		87.91	0.69	79.72
	86.88	0.36	49.82		85.43	0.61	80.24
	75.89	0.324	50.06		76.35	0.63	67.31
	92.14	0.38	54.18		94.35	0.57	70.99
	81.05	0.304	59.78		86.22	0.67	64.54
	93.28	0.374	56.61		88.82	0.63	69.76
	76.38	0.274	56.86		86.13	0.58	80.04
	87.83	0.33	60.13		78.74	0.55	75.05
	89.77	0.28	52.39		88.07	0.7	76.97
	75.1	0.3	62.41		86.62	0.65	65.48
	87.03	0.37	52.03		83.93	0.64	78.09
	87.06	0.33	62.66		82.22	0.67	79.55
	86.79	0.344	60.23		92.65	0.55	68.73
	82.68	0.37	62.19		78.96	0.65	73.86
	90.6	0.344	59.12		93.42	0.67	78.1
	92.86	0.304	62.03		82.87	0.58	67.42
	86.58	0.364	59.39		94.89	0.7	66.59
	90.06	0.334	64.81		88.6	0.57	75.01
	93.27	0.314	59.56		89.48	0.59	71.66
	85.94	0.32	47.27		77.71	0.61	70.44
	87.62	0.294	57.1		87.12	0.61	64.61
	77.71	0.34	54.59		93.58	0.63	76.51
	78.71	0.36	46.92		79.23	0.58	80.08
	92.92	0.31	59.5		92.36	0.55	71.7
	91.03	0.36	54.09		79.8	0.68	79.78
	76.55	0.36	51.9		79.72	0.56	82.84
	85.62	0.344	59.1		81.15	0.68	69.8
	83.13	0.35	58.13		77.65	0.56	70.44
	76.71	0.32	60.27		79.5	0.62	71.37
	88.86	0.274	45.04		85.7	0.63	70.42
	76.35	0.324	47.03		89.45	0.69	66.32
	78.86	0.334	49.46		88.27	0.69	76.59
	82.64	0.37	50.34		94.26	0.61	79.06
	90.61	0.304	57.13		86.05	0.61	82.21
	74.7	0.34	50.91		83.66	0.65	81.9
	93.87	0.35	59.18		76.37	0.6	70.57
	88.15	0.36	54.32		89.62	0.61	79.31
	77.79	0.354	63.61		89.52	0.56	77.27
	88.97	0.33	53.1		79.06	0.57	72.29
	83.88	0.354	54.11		90.56	0.65	80.64
	91.45	0.274	61.45		78.45	0.67	67.1
	90.03	0.344	59.92		91.09	0.7	67.01
	87.26	0.374	56.7		91.47	0.64	70.77
	87.29	0.284	54.77		84.06	0.63	79.51
	79.29	0.344	64.31		93.36	0.6	69.69
	86.03	0.294	46.5		93.8	0.66	77.1
	77.57	0.324	52.95		85.15	0.68	73.28
	92.45	0.364	55.9		80.76	0.64	66.28
	78.45	0.364	50.11		92.67	0.57	73.93
	86.68	0.3	54.87		76.49	0.61	77.41
	75.63	0.32	50.45		86.93	0.69	81.45
	85.26	0.29	52.9		90.59	0.69	80.5
	76.22	0.28	56.49		87.8	0.56	63.31
	78.27	0.36	52.3		94.68	0.63	75.8
	81.46	0.34	54.61		81.46	0.61	65.8
	76.08	0.374	57.61		78.59	0.56	72.31
	81.15	0.38	61.5		83.61	0.59	75.17
	90.61	0.28	48.84		78.05	0.56	72.84
	85.69	0.3	47.79		84.18	0.65	73.5
	90.16	0.29	45.83		78.36	0.6	76.84
	90.21	0.31	49.74		87.22	0.65	71.05
	87.84	0.31	57.81		91.53	0.59	80.84
	82.2	0.314	50.51		89.99	0.6	69.45
	76.73	0.344	50.61		82.36	0.67	82.17
	80.25	0.364	54.62		87.81	0.55	63.21
	90.6	0.33	54.49		77.91	0.69	78.78
	85.42	0.374	63.08		88.98	0.61	72.75
	82.53	0.354	47.24		84.92	0.56	73.56
	82.02	0.29	56.09		87.2	0.61	76.39
	88.41	0.31	64		78.61	0.57	63.18
	91.43	0.294	60.92		82.7	0.58	70.17
	89.76	0.32	60.99		81.31	0.66	79.21
	91.46	0.28	57.95		90.6	0.58	82.53
	78.32	0.3	49.25		90.66	0.67	82.08
	82.21	0.324	59.23		85.04	0.61	72.84
	74.54	0.36	63.57		86.88	0.62	74.55
	88.82	0.354	46.39		84.35	0.56	70.4
	82.22	0.304	59.78		81.71	0.6	63.54
	89.59	0.35	57.76		79.11	0.59	78.65
	77.3	0.324	64.34		91.69	0.61	71.04
	81.65	0.33	53.44		91.44	0.65	63.5
	82.18	0.34	50.19		87.55	0.57	65.77
	77.96	0.31	51.9		88.52	0.6	71.91
	85.89	0.374	56.74		85.93	0.61	71.85
	91.66	0.29	47.37		91.46	0.7	82.99
	75.02	0.3	61.11		82.95	0.56	75.32
	84.2	0.31	45.08		77.7	0.65	76.53
	82.21	0.364	58.99		81.32	0.61	68.1
	82.93	0.34	52.19		92.02	0.6	72.17
	93.62	0.354	58.63		94.89	0.62	73.26
	86.4	0.374	57.01		81.54	0.59	64.8
	83.13	0.294	51.79		90.95	0.6	67.37
	86.5	0.34	49.17		82.71	0.69	75.97
	89.6	0.284	63.89		91.29	0.6	67.06
	92.18	0.35	58.87		85.73	0.62	67.86
	91.86	0.364	46.59		89.54	0.63	63.86
	87.26	0.374	53.54		77.48	0.66	69.71
	92.44	0.3	53.2		81.21	0.67	65.49
	90.49	0.31	59.44		88.2	0.66	78.56
	87.87	0.314	54.63		86.63	0.66	72.35
	83.17	0.28	58.17		93	0.58	70.73
	86.24	0.294	62.43		88.91	0.69	74.83
	90.95	0.374	56.23		81.83	0.67	74.22
	80.59	0.294	60.21		84.01	0.6	64.76
	75.83	0.284	56.41		81.43	0.58	63.07
	79.64	0.36	54.76		91.56	0.56	71.05
	88	0.374	56.45		77.32	0.65	72.55
	75.69	0.284	49.6		79.77	0.61	69
	83.14	0.274	49.36		78.51	0.66	78.85
	79.81	0.354	48.65		89.54	0.55	69.26
	84.32	0.32	62.65		83.02	0.61	65.21
	77.9	0.35	53.47		80.87	0.61	69.31
	77.72	0.35	46.24		77.54	0.62	72.72
	75.15	0.35	61.14		78.88	0.59	77.28
	87.25	0.284	62.63		79.02	0.67	70.39
	76.74	0.28	61.41		93.1	0.57	82.36
	82.78	0.274	54.28		91.52	0.65	74.2
	86.44	0.33	63.15		92.39	0.59	66.63
	93.98	0.374	64.86		93.72	0.61	65.93
	80.56	0.304	45.44		81.16	0.62	74.55
	82.29	0.3	54.95		86.09	0.66	76.22
	81.62	0.36	45.42		80.37	0.67	77.75
	92.75	0.3	62.77		93.38	0.67	70.95
	84.94	0.354	53.36		79.96	0.61	65.84
	89.65	0.38	58.38		93.9	0.69	77.42
	79.83	0.28	56.4		88.83	0.69	69.5
	83.4	0.334	60.69		85.43	0.69	82.24
	92.78	0.294	48.09		78.81	0.62	68.38
	82.58	0.3	58.45		82.5	0.63	81.46
	83.1	0.37	50.24		90.69	0.6	82.38
	78.96	0.294	63.57		93.77	0.57	77.2
	88.57	0.29	55.28		86.58	0.65	64.52
	93.72	0.32	63.55		87.26	0.65	79.53
	75.02	0.38	59.93		91.61	0.7	76.51
	89.17	0.36	51.97		86.38	0.56	63.11
	75.83	0.294	57.58		93.67	0.57	66.91
	79.86	0.354	60.17		81.46	0.7	77.22
	89.13	0.374	55.2		93.74	0.7	65.68
	87.49	0.32	56.04		83.09	0.69	66.23
	83.04	0.31	52.7		79.36	0.66	82.34
	76.71	0.284	46.05		86.62	0.63	76.19
	87.34	0.28	62.89		85.68	0.61	81.37
	80.51	0.38	61.27		78.75	0.63	63.62
	92.92	0.354	60.9		80.89	0.57	66.11
	91.68	0.374	61.64		94.98	0.58	82.87
	89.34	0.304	59.06		77.51	0.62	71.69
	90.58	0.364	64.09		86.52	0.66	82.37
	76.59	0.274	56.04		86.51	0.62	73.61
	78.43	0.304	61.51		81.45	0.59	72.31
	74.48	0.35	52.11		88.24	0.66	77.92
	82.18	0.334	54.55		90.12	0.63	67.36
	82.27	0.354	53.27		91.08	0.64	74.84
	76.83	0.33	50.23		90.23	0.67	68.23
	83.9	0.334	54.77		91.36	0.7	68.65
	93.08	0.304	51.7		77.59	0.62	69.71
	75.7	0.294	53.8		86.78	0.68	66.34
	90.33	0.3	45.32		94.42	0.6	74.82
	91.83	0.344	64.27		77.92	0.65	82.57
	83.25	0.284	45.17		77.08	0.63	72.32
	86.77	0.38	57.52		91.99	0.58	72.28
	85.96	0.34	60.35		90.45	0.66	79.74
	83.96	0.35	58.22		92.13	0.55	70.74
	76.01	0.28	57.72		93.15	0.7	72.66
	92.68	0.324	57.96		90.24	0.69	69.77
	80.69	0.28	63.35		84.33	0.62	68.83
	89.96	0.334	57.58		77.35	0.59	80.97
	79.77	0.324	61.37		88.58	0.65	68.19
	93.9	0.34	48.13		91.43	0.7	63.35
	89.58	0.31	57.87		81.11	0.58	81.86
	86.3	0.34	60.79		77.47	0.64	72.77
	83.18	0.344	59.6		88.4	0.62	72.56
	91.5	0.354	62.02		86.19	0.65	64.11
	89.44	0.314	57.16		92.39	0.59	69.57
	74.54	0.324	60.79		82.74	0.57	81.85
	80.29	0.284	62.91		82.23	0.68	72.92
	87.36	0.37	64.14		80.4	0.63	65.15
	76.94	0.28	64.59		90.8	0.59	76.92
	81.53	0.344	59.78		93.01	0.65	72.89
	76.42	0.294	63.48		87.28	0.7	77.08
	80.25	0.34	53.98		88.59	0.69	65.21
	79.08	0.37	54.04		78.77	0.65	70.17
	82.05	0.294	62.95		79.96	0.61	69.27
	78.1	0.32	58.45		80.68	0.7	72.51
	88.7	0.29	56.2		82.76	0.58	63.5
	81.5	0.304	62.43		89.81	0.57	70.78
	90.86	0.364	59.92		91.55	0.59	82.23
	90.02	0.274	57.93		76.55	0.6	74.71
	93.32	0.3	46.68		94.81	0.63	70.32
	75.21	0.38	51.33		83.67	0.69	64.31
	87.22	0.344	63.71		83.47	0.57	74.52
	83.72	0.38	64.55		78.37	0.58	72.69
	80.12	0.344	62.59		82.4	0.67	64.02
	91.69	0.284	62.65		77.17	0.64	64.62
	81.64	0.294	64.85		94.55	0.58	71.81
	92.75	0.28	57.6		85.18	0.65	63.64
	87.8	0.354	53.3		93.2	0.59	67.68
	79.3	0.34	51.24		93.21	0.57	81.74
	92.41	0.35	52.37		82.08	0.58	79.13
	91.85	0.334	54.82		88.61	0.69	72.22
	82.9	0.3	45.5		91.23	0.65	81.93
	88.6	0.36	55.36		77.69	0.56	81.12
	80.53	0.34	46.08		86.85	0.63	64.81
	87.29	0.374	46.16		94.88	0.7	71.81
	93.53	0.324	50.96		84.49	0.56	67.54
	89.74	0.334	64.59		88.56	0.56	81.67
	88.97	0.324	61.39		89.11	0.62	72.06
	88.37	0.314	62.67		87.27	0.58	68.03
	75.47	0.374	54.02		90.19	0.67	81.2
	81.06	0.284	45.14		77.63	0.61	81.56
	91.28	0.37	62.53		79.44	0.67	71.74
	93.31	0.29	57.4		84.03	0.63	63.73
	85.8	0.37	59.95		82.86	0.62	72.33
	79.59	0.354	58.01		79.77	0.59	78.72
	92.11	0.32	51.72		78.98	0.64	67.27
	82.31	0.36	60.44		92.9	0.59	76.9
	81.42	0.354	60.18		85.38	0.63	78.48
	86.37	0.274	51.25		82.43	0.67	77.42
	89.83	0.354	45.2		82.98	0.57	71.16
	83.2	0.38	53.53		90.14	0.6	77.55
	82.56	0.274	59.63		83.74	0.68	63.63
	85.82	0.32	59.99		77.92	0.7	69.53
	91.81	0.32	61.21		85.01	0.66	71.62
	74.62	0.294	48.49		88.56	0.61	76.43
	92.2	0.334	47.65		80.96	0.67	78.59
	86.49	0.314	55.6		81.98	0.55	78.08
	91.18	0.284	52.6		85.76	0.61	81.38
	78.06	0.33	52.92		77.7	0.65	70.3
	75.5	0.354	46.92		92.78	0.6	76.3
	93.38	0.3	53.76		80.34	0.63	73.41
	93.5	0.304	50.58		83.63	0.57	75.2
	89.34	0.31	48.36		94.79	0.63	74.48
	86.99	0.324	51.51		93.27	0.55	77.6
	79.27	0.37	57.91		85.74	0.64	80.39
	91.71	0.32	49.34		78.6	0.65	77.19
	78.26	0.344	56.49		81.54	0.63	79.29
	83.77	0.344	58.93		89.49	0.57	63.8
	86.21	0.32	50.56		94.57	0.58	64.65
	76.76	0.28	45.22		94.03	0.62	79.15
	89.04	0.364	61.1		89.02	0.66	71.67
	74.73	0.294	60.83		84.2	0.69	77.35
	78.42	0.33	54.16		76.48	0.63	64.17
	77.57	0.334	53.14		77.21	0.7	71.8
	90.3	0.374	57.81		82.09	0.6	64.23
	89.57	0.374	45.55		79.12	0.67	82.59
	78.93	0.304	64.63		92.12	0.62	73.81
	79.7	0.36	63.02		80.73	0.65	77.01
	84.8	0.304	47.38		93.87	0.57	72.95
	91.31	0.36	47.3		84.84	0.55	67.9
	91.76	0.304	64.04		92.61	0.59	80.11
	79.01	0.31	55.61		93.54	0.7	79.21
	75.91	0.344	46.55		90.69	0.66	68
	91.06	0.38	63.28		94.93	0.67	68.45
	78.59	0.31	64.1		83.69	0.55	74.66
	83.32	0.31	62.64		81.39	0.61	75.9
	83.27	0.36	64.99		76.37	0.67	80.38
	91.59	0.29	46.55		78.31	0.66	79.15
	75.1	0.314	63.87		91.88	0.63	76.77
	80.34	0.34	57.15		94.66	0.62	70.1
	84.27	0.35	46.14		77.06	0.7	74.97
	89.98	0.284	53.83		84.94	0.64	66.85
	92.1	0.38	54.31		80.79	0.7	67.09
	91.96	0.364	63.34		93.02	0.58	63.78
	79.07	0.3	61.32		94.91	0.63	77.67
	84.26	0.374	59.89		85.88	0.69	71.85
	87.74	0.294	52.67		91.99	0.56	81.68
	87.85	0.344	49.97		89.14	0.69	70.31
	88.24	0.324	56.06		84.91	0.67	77.99
	85.64	0.36	64.87		85.52	0.62	70.11
	82.76	0.374	63.34		90.04	0.62	78.42
	76.1	0.354	64.25		80.11	0.65	68.37
	78.75	0.33	46.46		83.99	0.64	64.37
	90.09	0.29	62.78		90.73	0.68	76.98
	89.94	0.29	51.08		94.79	0.64	79.2
	81.59	0.284	55.1		84.81	0.65	71.03
	80.36	0.28	51.76		91.69	0.58	64.85
	83.66	0.324	60.01		84.86	0.56	80.05
	86.44	0.364	63.27		84.15	0.7	80.39
	88.6	0.284	48.45		88.98	0.63	64.77
	85.98	0.304	57.05		88.84	0.66	76.54
	92.82	0.344	50.5		80.43	0.62	81.59
	87.82	0.31	51.02		76.43	0.7	71.42
	84.22	0.36	56.72		82.18	0.58	73.56
	90.35	0.37	45.59		87.19	0.58	81.06
	92.88	0.29	62.36		78.42	0.56	68.93
	80.09	0.364	53.99		81.47	0.6	70.33
	84.88	0.29	47.35		90.45	0.6	73.1
	81.09	0.31	59.91		87.81	0.67	81.86
	75.5	0.32	45.2		82.64	0.63	67.11
	81.49	0.33	45.9		85.14	0.67	67.8
	93.95	0.354	45.95		94.75	0.67	81.5
	80.79	0.364	61.03		79.77	0.62	72.15
	76.88	0.314	59.55		79.46	0.61	65.03
	85.04	0.374	45.81		80.68	0.55	69.53
	92.05	0.374	55.16		87.82	0.62	74.01
	75.32	0.354	59.69		82.72	0.59	75.37
	78.11	0.31	49.63		88.78	0.7	64.28
	82.99	0.364	47.14		77.45	0.58	64.79
	93.33	0.354	59.6		87.1	0.61	76.36
	89.99	0.35	58.91		83.01	0.64	74.43
	78.85	0.38	62.41		80.58	0.63	73.89
	90.72	0.28	49.78		88.48	0.61	76.37
	93.97	0.344	64.83		80.39	0.63	72.97
	90.88	0.324	64.01		94.52	0.68	68.84
	91.99	0.3	53.18		82.8	0.59	77.81
	85.43	0.32	61.71		80.46	0.61	73.34
	81.44	0.354	60.28		82.47	0.55	65.24
	75.96	0.37	52.76		84.92	0.55	74.63
	74.6	0.284	60.01		79.08	0.57	79.05
	82.32	0.37	55.81		85.62	0.55	73.12
	86.64	0.35	53.86		91.18	0.6	76.18
	75.76	0.3	59.64		78.15	0.55	67.99
	79.98	0.34	60.37		77.26	0.65	66.21
	84.57	0.36	64.14		77.8	0.7	76.93
	93.39	0.334	58.4		91.66	0.69	81.03
	91.3	0.294	64.83		82.05	0.62	75.66
	84.22	0.35	62.29		88.24	0.57	78.02
	80.89	0.354	46.47		76.3	0.65	64.41
	89.42	0.284	48.96		90.09	0.56	81.67
	80.44	0.354	59.32		93.02	0.55	63.48
	75.36	0.324	61.87		88.21	0.69	69.95
	74.4	0.334	53.02		79.13	0.64	70.99
	85.22	0.34	45.57		93.01	0.57	68.82
	75.97	0.284	49.85		87.7	0.68	70.13
	90.59	0.324	51.82		82.32	0.57	71.81
	78.96	0.324	50.83		86.2	0.67	69.27
	85.47	0.33	63.76		90.57	0.58	69.36
	93.38	0.344	63.41		83.95	0.57	69.82
	88.63	0.33	49.43		88.96	0.55	70.63
	84.12	0.344	45.72		93.53	0.7	73.17
	93.12	0.374	58.26		93.12	0.56	68.81
	86.51	0.32	58.47		79.58	0.6	63.26
	77.46	0.364	51.51		91.28	0.69	79
	93.72	0.34	51.92		87.66	0.7	70.83
	80.83	0.364	61.82		94.49	0.56	82.73
	86.58	0.31	60.25		80.76	0.56	82.4
	81.1	0.344	53.77		78.71	0.65	63.1
	88.1	0.36	57.66		85.49	0.65	74.38
	85.28	0.304	51.73		79.11	0.67	74.26
	87.28	0.324	56.17		93.69	0.69	77.19
	85	0.294	52.87		82.76	0.7	68.73
	92.03	0.314	63.76		78.84	0.6	76.79
	79.79	0.274	45.08		93.21	0.64	67.22
	86.55	0.28	52.51		94.17	0.66	72.67
	78.33	0.36	52.07		76.65	0.58	76.37
	80.41	0.354	49.99		76.49	0.58	75.99
	91.5	0.304	61.57		77.42	0.6	70.64
	93.82	0.36	50.72		90.52	0.62	64.68
	75.58	0.344	48.84		91.62	0.7	64.96
	75.65	0.35	46.28		94.34	0.67	76.13
	91.41	0.32	60.81		87.67	0.7	68.33
	85.26	0.324	56.1		92.61	0.55	82.94
	82.04	0.34	63.11		81.84	0.66	74.12
	87.39	0.37	56.03		76.38	0.61	66.36
	77.4	0.364	50.24		77.41	0.55	69.56
	80.62	0.29	62.45		90.33	0.59	75.53
	83.43	0.274	49.18		77.45	0.57	81.31
	91.8	0.364	53.8		88.67	0.69	74.01
	89.37	0.324	61.57		90.04	0.65	67.1
	92.93	0.374	45.91		82.2	0.65	69.71
	91.96	0.344	47.97		80.06	0.56	67.55
	87.38	0.37	56.28		86.62	0.6	75.65
	78.6	0.31	53.3		81.55	0.65	67.08
	89.07	0.294	56.62		84.24	0.65	81.49
	82.25	0.304	59.44		83.97	0.58	67.37
	89.81	0.34	45.4		90.65	0.59	67.82
	82.45	0.3	55.46		82.34	0.68	68.13
	84.59	0.31	48.04		90.63	0.58	71.31
	81.05	0.3	59.9		77.83	0.57	67.98
	76.08	0.37	53.85		81.38	0.6	77.84
	90.75	0.354	47.3		90.41	0.67	77.32
	90.19	0.304	46.7		90.17	0.66	68.19
	77.32	0.334	52.68		83.26	0.63	78.18
	80.41	0.34	53.51		94.12	0.58	76.73
	78.28	0.324	47.16		87.4	0.68	63.27
	93.6	0.344	62		85.96	0.55	78.26
	92.48	0.34	60.03		91.3	0.62	69.6
	93.57	0.354	59.83		83.32	0.67	73.17
	92.95	0.304	64.53		85.07	0.62	73.42
	87.67	0.37	64.6		84.82	0.6	74.25
	87.73	0.37	50.15		83.99	0.6	70.74
	82.03	0.36	57.1		78.3	0.65	70.45
	75.07	0.32	58.55		78.1	0.66	69.94
	85.15	0.314	60.53		79.19	0.56	70.03
	93.86	0.3	52.48		78.45	0.68	79.17
	78.26	0.344	60.13		90.07	0.57	76.58
	93.42	0.324	54.9		77.48	0.64	80.74
	82.33	0.33	50.53		93.97	0.61	70.62
	76.02	0.324	60.05		77.01	0.67	77.59
	75.89	0.324	50.66		88.11	0.7	63.97
	79.42	0.3	57.39		80.18	0.68	79.06
	84.01	0.364	47.98		84.1	0.68	63.84
	78.03	0.29	56.17		81.36	0.69	69.53
	77.81	0.304	61.23		83.4	0.69	78.66
	79.51	0.294	51.64		90.1	0.66	79.57
	75.97	0.28	55.46		90.59	0.65	77.87
	77.27	0.344	52.51		77.02	0.6	77.02
	91.05	0.31	59.06		89.37	0.59	63.21
	79.39	0.37	48.49		88.4	0.61	78.45
	81.67	0.37	62.57		92.67	0.65	80.9
	88.79	0.334	45.32		77.8	0.57	81.29
	93.02	0.32	51.44		77.11	0.7	78.95
	77.34	0.31	62.9		85.66	0.66	82.51
	83.25	0.294	50.43		80.13	0.6	73.35
	77.63	0.32	55.91		78.66	0.59	64.69
	86.22	0.31	53.37		84.89	0.66	64.21
	78.46	0.344	49.07		79.33	0.65	68.08
	75.94	0.324	60.64		78.51	0.65	72.12
	92.76	0.28	57.66		91.45	0.55	69.97
	93.89	0.324	62.59		87.08	0.67	63.62
	93.41	0.29	54.66		78.76	0.63	66.54
	78.81	0.29	59.07		91.7	0.66	75.6
	82.56	0.34	62.43		83.67	0.65	79
	92.04	0.35	55.76		82.06	0.61	68.84
	76.11	0.374	58.17		86.88	0.61	68.1
	88.82	0.3	53.31		91.19	0.69	70.37
	76.03	0.33	54.89		92.1	0.61	67.36
	91.01	0.28	58.95		81.49	0.67	77.86
	83.72	0.324	46.2		94.26	0.64	76.75
	84.36	0.34	63.95		93.26	0.69	80.53
	82.04	0.3	55.91		85.25	0.64	73.78
	82.98	0.33	55.28		91.13	0.62	73.03
	76.85	0.33	53		93.91	0.65	80.92
	76.77	0.32	53.78		93.57	0.58	76.93
	92.77	0.334	54.06		89.72	0.65	79.83
	92.27	0.37	45.34		79.63	0.57	79.02
	92.04	0.3	52.86		94.43	0.59	63.43
	75.96	0.284	61.3		90.79	0.61	70.72
	84.12	0.36	62.12		78.8	0.65	72.7
	81.86	0.364	64.7		86.65	0.69	66.77
	93.41	0.36	62.13		81.29	0.55	65.78
	86.41	0.35	58.33		89.78	0.67	75.21
	92.41	0.28	45.9		88.61	0.56	64.39
	83.84	0.37	60.21		90	0.56	77.02
	81.79	0.364	64.62		94.65	0.62	71.37
	78.83	0.324	56.53		85.66	0.59	76.54
	92.49	0.34	57.44		86.39	0.62	71.79
	93.95	0.314	60.02		77.06	0.58	75.31
	91.49	0.324	46.59		83.63	0.62	75.27
	78.42	0.274	50.35		84.67	0.62	63.42
	84.05	0.28	59.54		88.22	0.7	66.83
	92.6	0.374	56.16		93.13	0.58	77.45
	75.22	0.294	60.63		80.54	0.58	79.75
	86.98	0.304	48.38		86.88	0.65	68.24
	86.43	0.3	58.62		80.56	0.69	79.81
	81.36	0.38	47.85		86.75	0.65	68.68
	84.68	0.34	60.36		80.61	0.67	72.67
	82.05	0.31	55.68		89.97	0.61	71.35
	83.96	0.32	61.51		82.77	0.69	77.86
	91.73	0.33	48		93.25	0.66	68.37
	79.37	0.36	64.78		81.02	0.7	73.54
	75.62	0.304	47.32		94.09	0.6	70.84
	80.16	0.36	64.09		80.03	0.63	73.42
	89.2	0.36	60.54		93.66	0.67	77.61
	87.32	0.29	48.94		94.83	0.68	78.57
	91.94	0.314	52.25		84.85	0.67	68.41
	78.03	0.304	45.63		93.37	0.59	66.5
	92.71	0.364	59.14		76.4	0.67	80.37
	91.15	0.29	49.88		78.42	0.6	73.69
	78.96	0.364	60.15		77.46	0.69	82.71
	84.9	0.374	54.93		78.94	0.62	65.29
	75.03	0.34	58.94		82.91	0.59	77.74
	78.86	0.334	50.68		87.21	0.7	63.24
	76.69	0.344	49.3		87.61	0.57	74.05
	85.19	0.354	49.04		77.32	0.65	71.85
	90.93	0.284	49.18		83.2	0.59	64.23
	93.56	0.33	58.47		83.25	0.67	71.58
	89.15	0.294	55.83		79.4	0.59	77.68
	76.23	0.304	61.96		81.34	0.7	64.8
	93.82	0.35	64.36		93.73	0.62	72.63
	74.68	0.36	54.27		84.02	0.56	79.22
	84.68	0.304	64.16		90.49	0.69	74.54
	85.8	0.37	53.21		81.24	0.56	82.34
	83.92	0.314	49.52		78	0.69	73.4
	83.72	0.284	48.28		94.56	0.58	77.83
	83.29	0.374	45.48		94.14	0.64	79.49
	92.8	0.35	45.09		80.22	0.6	67.78
	75.16	0.344	57.1		80.1	0.65	66.72
	80.99	0.34	57.42		79.46	0.68	67.36
	81.97	0.354	59.23		92.55	0.56	75.31
	74.41	0.3	56.24		89.68	0.6	65.92
	92.96	0.274	48.09		82.32	0.55	80.79
	76.3	0.314	48.25		87.35	0.62	77.35
	89.1	0.314	53.74		92.45	0.69	69.97
	84.31	0.364	62.22		87.2	0.66	66.1
	86.29	0.354	45.01		77.99	0.67	72.86
	82.91	0.31	63.87		89.66	0.67	80.95
	78.35	0.284	56.34		78.79	0.65	71.63
	89.09	0.31	45.57		80.87	0.68	75.35
	80.51	0.34	45.64		86.72	0.66	67.07
	76.88	0.35	52.29		89.66	0.7	71.83
	85.62	0.284	53.13		80.01	0.61	79.64
	89.76	0.374	55.31		85.12	0.66	67.43
	84.59	0.35	48.04		89.71	0.64	64.74
	80.92	0.28	55.67		76.55	0.69	81.42
	77.82	0.36	51.31		91.31	0.56	79.52
	88	0.344	63.21		81.28	0.61	63.19
	85.68	0.314	49.18		92.08	0.59	63.19
	80.29	0.32	54.57		91.35	0.58	71.13
	87.16	0.37	55.79		77.03	0.62	65.19
	88.22	0.354	52.75		76.33	0.58	63.1
	92.14	0.31	51.82		89.14	0.61	68.98
	82.42	0.37	58.04		91.63	0.6	70.53
	77.78	0.37	64.44		92.17	0.57	63.04
	89.75	0.314	52.24		85.82	0.63	64.52
	92.13	0.324	47.35		89.43	0.57	70.81
	86.57	0.374	49.58		93.61	0.56	82.79
	76.42	0.37	53.92		79.88	0.69	80.64
	81.27	0.36	59.75		76.43	0.67	77.65
	82.09	0.34	64.4		80.84	0.57	79.69
	88.86	0.344	55.04		83.24	0.63	80.91
	77.35	0.334	60.74		81.71	0.67	70.57
	78.42	0.37	63.09		78.84	0.57	81.31
	90.34	0.3	59.05		89.62	0.56	80.69
	93.87	0.28	51.01		93.99	0.62	71.98
	87.97	0.37	63		91.17	0.67	73.9
	82.09	0.334	50.66		83.19	0.62	68.53
	76.29	0.304	50.22		80.38	0.64	80.75
	78.03	0.324	46.57		77.88	0.66	64.34
	74.41	0.304	63.99		90.87	0.58	78.84
	75.57	0.364	61.87		91.59	0.56	63.26
	81.8	0.314	49.3		77.58	0.67	64.59
	85.18	0.304	56.93		90.85	0.56	79.41
	82.61	0.36	55.67		76.28	0.69	69.27
	88.16	0.284	60.64		91	0.58	70.33
	74.84	0.314	59.39		82.5	0.62	77.25
	93.55	0.3	55.71		89.27	0.55	81.11
	77.65	0.344	53.43		93.21	0.55	77.11
	87.78	0.33	55.78		79.17	0.67	81.81
	81.53	0.354	49.84		91.57	0.62	81.97
	76.25	0.28	48.66		78.8	0.62	64.16
	82.44	0.33	50.2		85.73	0.66	63.6
	82.21	0.38	45.35		94.25	0.69	75.8
	90.43	0.34	52.42		77.53	0.58	81.48
	83.26	0.36	47.77		76.92	0.64	72.37
	80.43	0.334	51.97		89.51	0.58	65.89
	88.63	0.29	56.74		93.42	0.64	64.42
	77.74	0.34	45.9		89.75	0.59	72.4
	83.26	0.3	58.8		78.42	0.69	68.54
	74.47	0.294	60.84		80.18	0.57	67.25
	91.2	0.33	50.51		91.86	0.66	73.66
	80.71	0.32	59.46		78.48	0.56	72.3
	74.95	0.294	51.05		83.11	0.7	68.34
	86.63	0.354	50.22		83.88	0.64	74.62
	85.39	0.324	61.23		81.83	0.62	73.8
	78.52	0.374	62.03		77.46	0.67	77.87
	87.52	0.35	54.43		82.14	0.64	73.69
	79.6	0.294	63.36		84.88	0.59	72.57
	81.68	0.374	56.31		79.23	0.59	64.86
	82.02	0.354	47.53		91.9	0.67	65.32
	87.85	0.284	59.36		76.33	0.68	76.18
	84.77	0.314	51.83		81.97	0.7	80.16
	83.97	0.304	60.43		86.44	0.57	71.34
	93.91	0.33	54.79		94.24	0.66	67.2
	81.65	0.29	57.76		89.83	0.66	69.66
	91.21	0.28	60.95		76.72	0.56	81.02
	86.3	0.35	56.23		86.91	0.69	68.41
	83.59	0.354	51.52		85.09	0.64	65.14
	78.84	0.37	49.69		85.39	0.56	70.83
	74.66	0.344	48.12		81.17	0.57	80.11
	93.01	0.34	63.82		90.09	0.66	69.52
	85.55	0.32	59.65		92.08	0.55	69.54
	84.91	0.374	64.99		81.1	0.62	81.48
	91.92	0.35	52.4		81.3	0.66	71.07
	79.19	0.28	46.79		89.66	0.56	69.31
	79.51	0.28	52.49		84.96	0.56	71.44
	93.3	0.34	59.12		81.69	0.6	68.34
	81.17	0.274	52.35		88.49	0.6	80.04
	83.38	0.364	64.92		93.44	0.57	70.65
	80.88	0.374	63.56		79.56	0.68	69.42
	79.74	0.294	48.26		92.52	0.6	68.83
	78.34	0.37	51.52		88.57	0.56	74.49
	84.73	0.28	45.28		82.02	0.56	66.93
	88.89	0.374	61.02		79.3	0.67	67.24
	89.33	0.304	60.95		83.12	0.56	78.72
	78.17	0.364	50.32		91.52	0.66	72.14
	81.79	0.324	62.18		86.41	0.6	75.03
	88.92	0.324	57.87		85.54	0.55	75.47
	80.46	0.36	45.08		90.09	0.7	81.46
	78.51	0.354	60.44		94.25	0.56	63.78
	74.82	0.294	53.73		91.69	0.68	79.87
	92.9	0.36	59.12		83.52	0.68	65.41
	83.64	0.3	50.53		89.35	0.68	71.54
	82.58	0.294	59.87		79.72	0.64	79.91
	83.02	0.32	64.1		92.22	0.64	71.45
	76.41	0.33	50.11		89.79	0.62	82.12
	85.36	0.354	46.2		84.39	0.66	68.63
	81.71	0.294	48.86		94.87	0.7	77.15
	79.61	0.354	63.46		80.28	0.62	64.49
	75.57	0.284	52.26		77.83	0.56	75.28
	91.52	0.38	58.38		90.15	0.59	72.39
	89.32	0.33	47.31		81.53	0.7	72.27
	75.02	0.274	55.6		91.87	0.59	71.49
	74.83	0.28	60		94.87	0.61	65.82
	77.05	0.304	45.91		93.12	0.65	63.08
	84.18	0.324	62		82.9	0.59	64.04
	90.48	0.294	58.75		79.88	0.57	72.75
	76.69	0.334	54.97		78.34	0.67	71.75
	78.44	0.31	48.29		94.31	0.62	68.19
	85.72	0.364	47.09		91.68	0.56	79.87
	93.23	0.314	59.63		86.51	0.63	77.59
	91.64	0.31	59.99		94.91	0.64	78.69
	82.19	0.304	59.7		94.94	0.55	63.8
	88.28	0.274	48.41		90.09	0.6	65.98
	92.45	0.274	46.15		82.92	0.65	75.25
	92.3	0.37	52.49		76.94	0.63	74.3
	83.71	0.32	63.21		81.87	0.67	78.98
	87.08	0.294	45.77		83.91	0.69	71.1
	87.84	0.35	61.24		76.78	0.55	64.2
	82.52	0.304	60.44		92.28	0.57	74.24
	77.8	0.334	58.47		93.4	0.65	75.48
	83.73	0.35	48.32		81.03	0.58	80.53
	80.71	0.31	64.9		76.78	0.61	66.42
	87.3	0.35	47.01		77.29	0.61	71.64
	93.07	0.3	46.73		80.02	0.56	65.26
	76.43	0.364	59.6		92.4	0.57	77.95
	82.15	0.344	55.1		87.53	0.61	70.79
	82.17	0.37	48.12		77.69	0.69	69.47
	82.49	0.28	61.96		78.12	0.7	79.55
	90.41	0.28	53.46		89.29	0.64	72.25
	84.69	0.334	59.91		90.21	0.69	74.79
	82.21	0.354	58.94		76.85	0.61	77.63
	84.81	0.33	46.31		88.95	0.68	70.6
	88.39	0.32	48.67		92.89	0.55	65.82
	86.54	0.35	61.84		83.73	0.64	68.73
	83.53	0.304	50.91		78.12	0.57	74.71
	76.91	0.34	63.84		78.99	0.69	65.37
	92.97	0.344	48.19		81.89	0.68	65.85
	93.57	0.33	52.81		87.98	0.66	65.69
	88.73	0.374	46.58		94.09	0.55	79.06
	82.28	0.314	61.94		91.93	0.6	77.32
	88.04	0.34	64.87		92.37	0.62	69.69
	83.42	0.324	59.57		80.12	0.56	64.29
	80.51	0.36	52.97		81.99	0.56	79.16
	84.12	0.31	53.24		80.06	0.67	69.81
	87.54	0.31	59.89		85.72	0.57	65.04
	75.41	0.34	46.64		78.95	0.66	67.15
	86.74	0.304	45.78		93.25	0.67	77.65
	89.04	0.31	57.62		94.1	0.58	76.08
	86.06	0.31	51.12		90.17	0.64	77.77
	91.76	0.314	58.93		86.02	0.69	81.2
	88.7	0.33	59.14		77.59	0.57	66.75
	84.74	0.33	60.56		79.97	0.58	71.96
	87.32	0.37	60.46		93.5	0.62	74.88
	87.64	0.33	46.85		91.27	0.62	73.85
	77.7	0.354	64.38		82.64	0.63	64.44
	92.6	0.364	54.62		92.44	0.63	78.59
	83.81	0.29	56.12		92.14	0.66	63.95
	90.95	0.354	59.75		88.61	0.68	77.61
	75.26	0.304	52.52		82.9	0.6	63.92
	80.23	0.37	58.96		89.08	0.69	75.67
	75.01	0.334	55.1		83.32	0.65	72.31
	81.21	0.29	49.41		76.66	0.66	67.64
	84.35	0.3	59.56		91.56	0.63	75.43
	83.94	0.33	54.71		81.3	0.61	70.45
	91.01	0.37	63.84		92.81	0.6	76.57
	90.58	0.354	62.68		81.62	0.58	65.76
	81.83	0.32	50.96		76.39	0.69	73.39
	80.79	0.37	50.68		83.09	0.63	71.39
	88.17	0.37	61		78.44	0.7	71.57
	85.59	0.374	46.39		92.42	0.7	66.54
	79.06	0.31	64.31		87.07	0.57	82.55
	93.96	0.344	48.84		82.52	0.68	72.2
	86.3	0.364	57.12		86.6	0.65	78.88
	88.93	0.35	54.36		89.87	0.65	67.87
	88.62	0.374	48.21		78.82	0.62	70.44
	89.01	0.35	53.78		83.25	0.59	74.53
	90.57	0.344	59.74		76.42	0.67	77.82
	81.73	0.33	52.82		88.59	0.7	71.15
	92.52	0.32	55.36		80.53	0.67	71.45
	84.74	0.31	51.86		82.65	0.66	72.1
	77.6	0.36	52.19		85.67	0.63	70.52
	74.6	0.344	56.07		86.68	0.6	77.29
	89.11	0.36	62.41		94.05	0.65	63.67
	86.03	0.294	61.02		78.35	0.59	82.77
	92.91	0.37	60.8		83.42	0.64	72.41
	88.88	0.354	60.27		88.87	0.69	82.53
	79.94	0.354	60.04		89.78	0.61	68.76
	78.35	0.274	51.12		90.9	0.65	79.44
	82.89	0.334	53.36		76.45	0.7	68.93
	89.49	0.36	45.69		87.59	0.57	81.71
	81.15	0.32	58.93		94.05	0.57	81.76
	77.1	0.35	55.08		84.88	0.64	70.75
	88.11	0.364	64.27		78.78	0.68	82.23
	91.59	0.31	50.27		79.71	0.65	78.56
	93.29	0.31	58.59		82.12	0.63	76.55
	74.74	0.3	49.03		79.64	0.61	64.16
	85	0.364	55.09		79.08	0.6	80.76
	86.47	0.344	59.38		83.92	0.65	82.74
	78.48	0.274	59.77		88.34	0.65	66.76
	78.37	0.28	55.96		81.28	0.55	68.89
	92.4	0.37	57.83		93.61	0.63	63.45
	87.84	0.31	63.08		87.1	0.57	70.66
	82.76	0.364	47.58		76.2	0.7	69.82
	92.08	0.324	57.69		76.23	0.6	79.44
	78.94	0.36	60.99		92.95	0.59	75.21
	74.8	0.294	47.95		85.38	0.7	76.5
	87.95	0.32	53.12		86.96	0.6	77.82
	91.35	0.344	63.76		81.52	0.68	72.53
	82.22	0.334	45.32		94.47	0.64	69.26
	77.67	0.304	58.43		89.88	0.64	63.84
	76.27	0.33	51.18		93.62	0.59	63.04
	78.26	0.34	61.12		93.66	0.63	81.75
	76.08	0.334	52.64		88.38	0.66	73.5
	82.31	0.294	60.96		92.72	0.58	67.51
	92.18	0.324	60.67		92.96	0.69	67.21
	86.25	0.354	55.79		93.29	0.59	80.31
	89.13	0.354	61.56		89.99	0.63	63.39
	82.91	0.354	47.81		79.44	0.65	67.17
	84.14	0.31	49.08		78.53	0.59	69.05
	87.44	0.35	50.3		79.05	0.56	77
	89	0.284	45.6		82.19	0.61	70.74
	88.74	0.36	54.31		91.11	0.57	80.19
	79.64	0.374	54.07		92.05	0.59	78.42
	88.32	0.294	64.71		86.03	0.59	67.23
	79.33	0.284	45.75		77.04	0.65	82.34
	85.55	0.34	64.65		92.79	0.66	71.03
	75.07	0.29	51.92		78.04	0.68	74.39
	83.22	0.32	57.47		79.12	0.55	71.57
	82.34	0.28	60.63		76.28	0.58	75.63
	80.2	0.304	59.68		87.67	0.64	69.01
	93.55	0.284	51.76		88.54	0.67	80.05
	86.72	0.35	64.46		80.05	0.63	68.98
	85.5	0.3	63.69		81.95	0.62	77.32
	91.87	0.364	61.74		86.33	0.63	69.5
	86.81	0.324	57.24		90.27	0.55	80.88
	80.97	0.294	46.46		89.26	0.61	73.77
	93.19	0.274	45.96		80.2	0.68	78.65
	76.43	0.344	62.55		86.87	0.64	64.19
	86.13	0.344	51.89		92.4	0.58	73.37
	80.66	0.31	50.32		83.4	0.6	70.24
	89.85	0.29	64.28		82.44	0.57	63.8
	83.3	0.344	46.92		85.17	0.7	77.63
	80.6	0.364	45.11		87.95	0.59	71.5
	81.08	0.3	63.44		83.11	0.6	72.4
	77.81	0.3	56.53		92.34	0.57	70.57
	92.95	0.31	55.66		94.84	0.56	74.8
	79.47	0.32	57.6		78	0.65	64.39
	76.88	0.34	53.7		89.96	0.57	73.67
	86.54	0.37	55		89.6	0.56	74.39
	93.29	0.34	48.29		83.5	0.68	67.55
	90.04	0.364	59.62		86.28	0.56	72.37
	87.33	0.34	63.96		93.97	0.69	63.25
	87.74	0.284	48.41		90.8	0.6	76.3
	81.24	0.36	64.58		87.6	0.56	70.89
	80.53	0.274	46.36		80.47	0.67	66.68
	81.34	0.354	53.29		81.04	0.68	72
	84.56	0.324	64.35		86.76	0.55	80.3
	76.7	0.314	48.51		79.33	0.63	68.23
	84.66	0.31	54.49		77.36	0.66	78.19
	93.98	0.34	56.53		91.93	0.68	64.05
	78.93	0.334	54.14		79.54	0.64	72.5
	92.32	0.374	48.39		81.58	0.58	73.58
	87.71	0.28	45.76		79.56	0.65	72.27
	85.09	0.37	56.02		84.26	0.69	68.99
	92.78	0.36	49.54		94.19	0.61	65.22
	76.88	0.36	51.06		91.85	0.62	76.67
	87.66	0.28	64.7		87.18	0.56	68.94
	92.29	0.284	56.33		77.52	0.56	71.73
	85.71	0.37	56.55		90.41	0.6	76.85
	76.31	0.33	52.9		92.98	0.59	65.33
	79.78	0.334	64.37		89.9	0.66	74.29
	84.3	0.334	57.06		83.29	0.6	69.44
	78.48	0.354	47.15		86.08	0.62	66.09
	74.94	0.344	45.03		92.15	0.7	77.15
	80.87	0.35	51.47		92.13	0.69	68.06
	74.63	0.364	58.18		83.29	0.66	80.59
	81.71	0.35	48.14		76.86	0.62	71.77
	86.79	0.304	61.37		87.73	0.61	64.17
	79.41	0.274	63		84.33	0.57	69.58
	82.69	0.274	56.94		81.1	0.58	70.24
	85.4	0.344	53.74		89.37	0.56	68.23
	90.1	0.34	48.28		91.67	0.63	71.12
	82.28	0.294	64.41		82.89	0.66	67.61
	77.48	0.29	56.38		84.81	0.62	77.26
	85.69	0.32	47.23		83.67	0.7	70.69
	85.5	0.294	61.08		85.84	0.64	73.33
	80.65	0.334	47.49		81.38	0.66	79.9
	78.21	0.38	50.86		92.46	0.69	82.2
	78.45	0.29	51.47		87.7	0.58	74.62
	90.73	0.35	51.9		86.05	0.69	66.09
	74.95	0.354	47.25		86.53	0.69	69.62
	89.02	0.34	51.41		93.83	0.64	78.94
	84.07	0.32	62.35		85.66	0.62	74.34
	78.28	0.36	53.95		84.53	0.65	63.47
	88.72	0.3	56.76		82.44	0.63	70.29
	87.03	0.34	47.75		82.31	0.57	77.8
	91.74	0.364	53.26		90.15	0.7	78.77
	76.26	0.334	55.29		90.79	0.69	69.9
	86.31	0.32	62.09		78	0.66	81.57
	80.74	0.324	63.89		76.46	0.57	81.91
	83.23	0.284	49.29		78.35	0.67	82.46
	91.08	0.37	64.32		86.1	0.56	63.84
	74.45	0.31	55.3		86.51	0.63	80.48
	80.41	0.344	47.52		90.59	0.7	71.2
	88.29	0.334	51.6		94.75	0.64	65.14
	90.17	0.324	60.08		90.06	0.63	76.49
	89.53	0.304	56.49		88.29	0.6	73.33
	74.69	0.304	51.33		91.83	0.66	66.82
	85.33	0.344	50.62		81.1	0.69	71.68
	92.98	0.364	61.28		77.54	0.66	63.84
	74.84	0.374	61.62		93.26	0.65	82.2
	83.97	0.32	56		78.74	0.67	71
	74.71	0.3	54.72		92.42	0.6	82.81
	80.61	0.38	46.02		85.25	0.68	74.3
	86.88	0.354	51.57		78.48	0.67	74.19
	77.35	0.29	59.56		90.06	0.64	67.37
	80.83	0.31	59.72		81.13	0.56	79.24
	83.98	0.36	61.73		77.46	0.63	71.45
	85.17	0.304	58.03		80.26	0.68	79.77
	93.08	0.34	46.97		93.8	0.61	71.21
	76.97	0.364	47.19		81.73	0.56	80.08
	92.1	0.344	48.31		90.57	0.61	71.15
	88.3	0.35	55.71		94.39	0.61	66.28
	91.61	0.28	61.31		88.79	0.7	66.86
	89.17	0.32	53.89		77.03	0.59	80.23
	77.16	0.324	58.26		81.55	0.6	82.79
	91.91	0.294	51.73		83.17	0.7	64.44
	87.68	0.274	47.87		87.75	0.68	71.05
	74.8	0.33	59.32		90.16	0.58	65.89
	85.09	0.294	47		79.96	0.7	65.24
	85.71	0.344	52.32		92.79	0.56	76.21
	89.77	0.334	52.19		88.63	0.6	79.52
	92.83	0.314	59.92		77.53	0.7	79.51
	83.31	0.314	50.57		90.61	0.63	82.12
	86.89	0.344	63.54		80.93	0.64	68.74
	83.71	0.28	62.88		91.03	0.64	78.84
	75.21	0.364	47.35		80.84	0.56	68.91
	76.72	0.31	51.76		85.53	0.62	70.64
	90.5	0.344	55.91		78.75	0.61	74.32
	76.12	0.34	62.61		85.17	0.66	64.78
	76.93	0.35	54.66		78.75	0.56	79.17
	90.85	0.35	47.62		82.06	0.56	78.49
	81.52	0.36	57.45		93.89	0.61	72.22
	77.23	0.28	63.64		86.73	0.65	74.9
	84.14	0.304	58.75		92.72	0.6	74.02
	88.65	0.31	63.52		81.07	0.58	68.44
	85.4	0.28	54.9		76.94	0.68	74.5
	77.2	0.344	57.92		91.98	0.58	64.13
	78.88	0.354	53.01		90.46	0.68	63.48
	89.02	0.354	45.91		87.76	0.7	82.24
	82.6	0.36	52.24		84.45	0.57	80.23
	86.07	0.374	58.83		89.57	0.59	71.55
	80.95	0.314	63.17		77.21	0.57	77.48
	89.08	0.32	51.25		92.77	0.59	79.31
	84.26	0.37	46.05		80.85	0.61	80.25
	84.3	0.32	55.91		79.58	0.59	67.37
	81.07	0.374	50.24		81.48	0.58	69.68
	87.16	0.364	55.93		86.87	0.63	82.53
	89.72	0.374	59.1		90.76	0.68	79.29
	92.98	0.354	47.55		90.05	0.69	66.63
	80.47	0.33	46.55		89.23	0.56	67.1
	87.69	0.344	50.93		92.68	0.67	81.66
	82.57	0.37	46.49		89.59	0.62	75.81
	90.41	0.354	48.34		82.29	0.57	71.04
	85.91	0.3	55.29		86.43	0.66	64.34
	74.78	0.284	62.38		79.99	0.69	77.29
	79.86	0.37	49.96		82.22	0.67	68.79
	77.74	0.334	47.29		78.12	0.67	67.32
	92.24	0.36	52.84		91.31	0.67	73.41
	90.88	0.374	49.2		88.02	0.6	78.17
	92.09	0.29	49.56		92.85	0.58	82.75
	75.9	0.3	57.67		78.87	0.6	65.28
	77.16	0.28	63.42		79.82	0.6	79.89
	81.18	0.35	64.58		79.33	0.65	73.19
	81.31	0.324	51.93		89.61	0.68	77.85
	76.51	0.37	62.29		81.01	0.6	69.61
	77.52	0.31	51.04		81.14	0.56	79.37
	89.71	0.334	55.19		84.12	0.59	71.61
	77.74	0.284	50.65		78.37	0.66	73.32
	85.27	0.314	51.05		94.81	0.65	64.29
	88.3	0.28	55.21		90.58	0.65	77.77
	83.84	0.33	53.12		93.69	0.65	79.68
	83.55	0.274	58.2		83.69	0.62	76.67
	85.5	0.33	46.25		87.14	0.69	82.9
	78.54	0.34	59.05		87.88	0.67	69.65
	93.45	0.274	52.25		83.14	0.58	79.89
	77.19	0.34	49.32		79.14	0.59	72.74
	81.15	0.374	48.43		94.72	0.63	72.53
	91.28	0.3	64.89		82.07	0.66	78.14
	74.53	0.29	64.33		94.11	0.66	72.47
	91.08	0.274	57.85		82.87	0.58	64.1
	90.67	0.284	59.87		92.78	0.61	75.17
	79.13	0.344	50.55		80.49	0.55	67.24
	88.89	0.374	47.99		91.69	0.68	74.47
	83.81	0.354	58.62		90.09	0.6	73.25
	78.56	0.344	59.92		78.8	0.57	69.68
	91.51	0.284	45.45		77.43	0.57	79.78
	89.08	0.364	54.82		91.1	0.64	70.6
	93.5	0.284	55.12		86.18	0.6	81.8
	79.2	0.36	47.29		84.1	0.56	77.91
	87.9	0.294	59.12		82.11	0.55	68.47
	84.45	0.334	62.87		78.59	0.6	74.97
	77.01	0.34	54.08		80.64	0.56	74.33
	92.75	0.294	59.78		93.89	0.67	67.01
	77.56	0.34	60.05		83.7	0.62	67.83
	79.09	0.364	57.8		94.21	0.65	66.68
	91.28	0.304	53.8		87.16	0.55	63.53
	78.17	0.29	58.56		78.5	0.61	66.55
	92.62	0.34	62.4		83.16	0.55	76.76
	77.08	0.364	54.49		88.94	0.61	80.9
	85.42	0.294	53.83		87.47	0.7	69.89
	92.35	0.38	59.35		86.48	0.59	77.45
	75.17	0.32	53.5		82.84	0.58	75.59
	76.39	0.37	51.38		82.98	0.6	70.19
	83.64	0.3	46.03		78.83	0.66	76.23
	87.76	0.324	58.46		82.37	0.58	80
	78.66	0.354	64.1		77.25	0.61	65.43
	86.14	0.35	55.09		84.22	0.64	74.93
	75.24	0.344	45.85		87.94	0.61	66.73
	90.88	0.37	55.35		84.04	0.67	70.42
	81.49	0.31	49.91		88.9	0.59	73.3
	86.53	0.284	61.72		78.27	0.6	74.87
	81.43	0.304	64.79		82.53	0.66	65.25
	91.35	0.34	58.03		89.83	0.58	77.01
	81.86	0.38	61.05		82.22	0.6	66.38
	82.43	0.34	50.94		82.05	0.65	78.45
	87.88	0.314	59.45		94.46	0.55	69.59
	80.62	0.34	53.95		87.3	0.58	63.58
	80	0.304	52.08		82.68	0.57	82.95
	77.97	0.3	57.37		85.31	0.65	71.68
	77.54	0.364	64.33		88.64	0.57	75.33
	78.9	0.324	52.92		90.44	0.62	73.68
	86.79	0.36	63.98		81.54	0.61	78.64
	76.6	0.33	62.78		81.92	0.69	69.09
	79	0.334	50.77		77.92	0.65	73.88
	90.29	0.3	45.08		88.58	0.7	68.48
	77.75	0.284	54.65		86.32	0.67	76.76
	84.6	0.31	52.87		87.29	0.57	75.32
	79.93	0.33	51.38		79.86	0.57	65.73
	91.8	0.364	58.71		84.24	0.62	75.94
	80.53	0.34	50.84		92.11	0.68	72.86
	90.86	0.31	58.83		94.94	0.57	63.1
	86.73	0.294	61.78		84.49	0.56	79.23
	89.73	0.324	46.93		87.1	0.61	75.54
	93.27	0.324	61.83		81.44	0.56	76.26
	87.93	0.28	47.49		86.55	0.64	69.15
	80.55	0.35	48.1		90.75	0.55	69.46
	85.49	0.324	47.67		85.14	0.65	77.66
	93.41	0.33	54.06		94.7	0.69	68.57
	88.93	0.34	55.61		87.69	0.7	71.26
	80.43	0.364	47.22		79.73	0.6	72.9
	83.67	0.304	46.83		80.87	0.64	68.08
	82.34	0.344	62.91		87.36	0.64	74.61
	91.56	0.37	56.5		84.26	0.65	82.32
	88.36	0.33	48.39		87.85	0.67	68.71
	89.75	0.354	48.45		94.42	0.7	79.61
	92.77	0.3	57.39		86.55	0.66	64.26
	86.37	0.284	48.17		93.43	0.57	76.24
	93.55	0.284	52.65		82.42	0.69	81.33
	91.29	0.32	53.8		82.89	0.7	79.36
	93.7	0.284	63.94		94.98	0.56	77.46
	86.38	0.334	59.9		82.1	0.59	81.26
	85.93	0.304	48.48		81.15	0.63	71.76
	87.13	0.31	64.39		90.8	0.69	70.77
	88.24	0.364	57.28		83.34	0.57	72.94
	80.59	0.37	49.51		89.17	0.67	82.17
	77.11	0.334	55.32		87.73	0.67	66.48
	84.7	0.28	55.18		91.28	0.67	81.54
	91.49	0.364	48.01		78.17	0.65	71.73
	90.86	0.294	54.65		76.76	0.58	66.72
	74.85	0.35	56.41		83.02	0.59	68.07
	82.83	0.33	58.61		90.22	0.66	70.15
	86.42	0.314	56.16		85.55	0.59	77.94
	77.55	0.36	45.26		89.97	0.61	76.51
	86.31	0.36	60.3		91.07	0.65	82.82
	87.76	0.324	46.1		82.13	0.61	65.89
	91.53	0.314	58.64		88.09	0.57	67.22
	93.14	0.374	64.01		91.91	0.61	65.8
	93.22	0.314	62.96		90.28	0.69	76.35
	77.29	0.33	59.17		84.69	0.7	82.16
[truncated: 6,855 more rows]
