# Supplementary material for: Self-aware face emotion accelerated recognition algorithm: a novel neural network acceleration algorithm of emotion recognition for international students
Source: PeerJ Comput Sci. 2023 Sep 26;9:e1611. doi: 10.7717/peerj-cs.1611 (PMC10557955; doi:10.7717/peerj-cs.1611)
Supplement: Supplemental Information 3 [file peerj-cs-09-1611-s003.xlsx]

## Sheet: ResNet
		SFEARA(ResNet)		180			ResNet	180
	acc	sirt	ec	sumtime		acc	sirt	ec	sumtime
	74.29	0.15	30.43	0.142		76.74	0.258	42.32	0.23
	72.06	0.134	29.11	0.132		74.75	0.198	32.37	0.2
	71.91	0.134	28.68	0.142		78.21	0.21	34.91	0.21
	72.71	0.144	25.08	0.142		79.46	0.258	39.78	0.17
	72.48	0.15	18.89	0.11		77.34	0.238	31.38	0.19
	72.17	0.14	19.61	0.14		78.97	0.21	32.43	0.18
	74.2	0.144	19.55	0.102		79.93	0.228	39.05	0.16
	74.63	0.144	27.83	0.122		75.95	0.19	39.43	0.16
	73.88	0.14	22.01	0.11		75.65	0.26	30.88	0.24
	73.33	0.134	29.72	0.142		71.29	0.188	36.53	0.22
	73.37	0.144	21.12	0.132		75.61	0.23	34.6	0.23
	72.35	0.144	24.55	0.132		74.34	0.238	33.11	0.17
	73.25	0.14	33.45	0.122		72.94	0.208	34.23	0.21
	73.56	0.14	25.75	0.122		76.79	0.238	32.74	0.22
	72.6	0.14	27.55	0.1		78.58	0.198	36.49	0.15
	73.99	0.144	32.95	0.14		78.32	0.228	41.04	0.2
	73.55	0.144	23.37	0.122		78.35	0.268	37.81	0.21
	74.54	0.14	24.05	0.12		72.04	0.21	40.91	0.23
	72.7	0.15	21.97	0.13		70.47	0.25	31.24	0.21
	73.43	0.14	18.09	0.1		71.72	0.208	35.87	0.23
	72.46	0.15	27.79	0.142		70.97	0.21	40.91	0.21
	73.24	0.134	22.52	0.112		73.17	0.19	40.95	0.17
	72.92	0.134	32.12	0.1		78.02	0.22	30.32	0.21
	73.24	0.14	22.58	0.122		72.91	0.19	31.1	0.18
	74.83	0.14	27.95	0.12		75.3	0.26	30.91	0.21
	73.38	0.14	27.54	0.132		76.43	0.23	32	0.15
	74.43	0.144	20.5	0.132		77.01	0.25	39.48	0.15
	74.9	0.144	17.88	0.112		76.77	0.25	32.34	0.22
	71.91	0.144	24.4	0.13		74.41	0.188	39.97	0.2
	72.3	0.14	16.85	0.1		73.38	0.258	37.08	0.17
	73.52	0.134	24.02	0.13		73	0.23	36.11	0.14
	73.91	0.144	19.99	0.092		70.69	0.2	35.77	0.24
	73.82	0.14	30.19	0.1		72.59	0.228	39.17	0.23
	74.39	0.14	17.6	0.122		76.05	0.19	31.82	0.14
	74.59	0.15	21.97	0.092		77.49	0.268	37.35	0.22
	73.59	0.14	23.65	0.1		75.99	0.218	33.57	0.24
	74.77	0.14	16.43	0.122		77.4	0.268	40.06	0.16
	72.6	0.15	32.39	0.1		70.8	0.248	30.08	0.17
	74.34	0.144	28.2	0.132		76.87	0.2	39.05	0.14
	74.89	0.134	19.37	0.12		75.21	0.198	41.68	0.21
	72.47	0.144	30.25	0.12		70.95	0.258	31.36	0.15
	73.96	0.144	27.25	0.112		76.52	0.238	32.92	0.19
	72.5	0.14	23.4	0.12		73.65	0.218	33.87	0.14
	73.47	0.144	16.56	0.102		73.61	0.198	37.99	0.21
	74.33	0.134	16.06	0.15		72.09	0.248	36.29	0.17
	74.5	0.14	26.71	0.122		78.19	0.26	37.84	0.18
	73.89	0.144	30.94	0.11		76.44	0.21	31.49	0.15
	73.26	0.144	29.14	0.112		74.45	0.23	38.17	0.19
	71.93	0.144	32.45	0.122		73.22	0.248	41.3	0.22
	72.16	0.134	18.35	0.11		79.43	0.2	41.2	0.15
	73.7	0.134	18.13	0.142		77.81	0.188	37.16	0.18
	72.72	0.14	33.42	0.112		73.3	0.258	30.48	0.23
	73.06	0.14	27.28	0.132		78.75	0.2	38.07	0.15
	74.77	0.134	27.46	0.12		76.95	0.258	31.2	0.17
	74.78	0.134	21.27	0.122		78.62	0.208	35.13	0.17
	73.7	0.144	27.49	0.102		74.07	0.218	31.59	0.21
	72.21	0.144	17.73	0.112		70.6	0.228	31.45	0.22
	73.3	0.15	33.74	0.14		77.36	0.218	33.35	0.18
	74.89	0.144	31.45	0.132		70.77	0.208	31.77	0.18
	73.42	0.144	22.41	0.102		73.88	0.23	32.92	0.2
	72.02	0.15	23.09	0.122		73.66	0.22	41.16	0.23
	72.03	0.15	31.67	0.11		71.88	0.188	33.37	0.16
	73.74	0.15	22.11	0.142		79.17	0.25	31.17	0.18
	72.34	0.14	21.85	0.132		70.47	0.19	40.63	0.24
	74.74	0.144	23.94	0.13		70.68	0.248	34.11	0.23
	73.39	0.144	22.25	0.11		70.68	0.22	32.66	0.2
	74.9	0.134	22.26	0.15		76.79	0.198	35.32	0.2
	72.59	0.144	22.34	0.15		76.83	0.188	33.23	0.21
	72.66	0.14	22.27	0.142		78.38	0.19	36.63	0.19
	71.83	0.144	28.72	0.12		71.61	0.198	33.07	0.22
	74.96	0.134	17.68	0.142		79.33	0.22	33.24	0.22
	72.02	0.14	32.86	0.14		73.06	0.2	34.33	0.21
	74.21	0.14	22.27	0.13		78.36	0.248	34.74	0.22
	72.89	0.134	18.36	0.11		74.42	0.25	31.49	0.21
	74.45	0.14	23.86	0.112		74.81	0.2	34.45	0.17
	74.67	0.134	16.1	0.102		71.23	0.24	39.66	0.21
	72.61	0.14	26.83	0.122		74.21	0.228	39.99	0.17
	73.74	0.144	23.24	0.13		77.95	0.2	38.47	0.22
	71.92	0.14	18.15	0.112		79.48	0.218	33.72	0.16
	72.54	0.134	25.04	0.132		72.02	0.2	40.81	0.15
	72.13	0.14	26.75	0.122		79.8	0.238	39.74	0.2
	74.3	0.14	33.7	0.15		78.72	0.228	34.08	0.2
	73.1	0.144	27.9	0.132		73.54	0.24	38.68	0.17
	72.74	0.14	27.53	0.122		78.31	0.25	42.21	0.15
	72.71	0.144	17.5	0.12		72.19	0.18	35.05	0.22
	72.06	0.134	26.43	0.102		78.88	0.22	34.23	0.16
	73.15	0.14	22.97	0.092		74.97	0.26	38.83	0.24
	73.28	0.144	23.05	0.142		74.67	0.22	36.99	0.17
	72.22	0.144	17.6	0.1		72.05	0.22	34.18	0.23
	72.31	0.15	24.76	0.14		79.72	0.238	39.29	0.2
	74.97	0.14	16.94	0.102		72.09	0.228	38.73	0.17
	72.91	0.14	32.1	0.132		77.46	0.228	41.68	0.23
	73.59	0.144	22.55	0.122		77.23	0.248	31.74	0.18
	74.2	0.14	27.03	0.112		79.11	0.24	32.41	0.19
	73.19	0.144	32.07	0.092		78.31	0.25	40.03	0.16
	72.08	0.15	26.56	0.112		77.1	0.21	35.52	0.15
	74.9	0.144	29.87	0.092		76.86	0.198	34.59	0.14
	74.38	0.144	26.89	0.1		71.65	0.2	37.8	0.23
	73.61	0.15	21.9	0.112		71.07	0.21	41.92	0.19
	72.84	0.15	32.6	0.12		73.53	0.238	36.88	0.16
	72.17	0.14	29.81	0.112		71.38	0.2	37.08	0.15
	74.46	0.144	32.3	0.1		70.94	0.22	35.91	0.22
	74.09	0.144	22.55	0.13		73.96	0.2	37.95	0.16
	71.84	0.144	28.53	0.13		72.08	0.24	38.32	0.21
	73.71	0.15	22.77	0.112		72.67	0.23	38.74	0.15
	72.98	0.14	25.57	0.11		78.68	0.25	37.49	0.23
	73.81	0.15	26.11	0.11		72.21	0.228	38.53	0.21
	74.64	0.144	31.65	0.142		78.68	0.228	41.49	0.23
	73.21	0.14	16.38	0.102		73.37	0.228	39.57	0.21
	74.28	0.14	20.14	0.11		79.6	0.2	33.66	0.21
	72.37	0.144	21.6	0.132		71.08	0.22	36.5	0.22
	74.58	0.134	17.01	0.13		75.43	0.248	41.52	0.2
	71.88	0.15	27.69	0.11		74.79	0.23	32.62	0.16
	73.41	0.14	19.93	0.14		70.66	0.248	35.24	0.22
	72.02	0.14	16.52	0.112		73.42	0.208	38.53	0.16
	74.88	0.144	16.15	0.12		75.98	0.18	37.35	0.24
	72.52	0.144	23.23	0.13		76.33	0.218	32.1	0.23
	74.19	0.14	31.44	0.12		75.19	0.248	37.27	0.14
	73.28	0.144	22.31	0.12		79.71	0.238	33.35	0.21
	74.87	0.144	29.3	0.14		73.04	0.238	32.41	0.15
	71.9	0.144	17.34	0.11		73.61	0.228	41.08	0.15
	72.26	0.14	25.4	0.15		74.35	0.208	34.41	0.17
	73.06	0.14	26.57	0.102		79.74	0.24	33.61	0.17
	71.91	0.14	29.66	0.102		75.59	0.188	32.97	0.19
	72.83	0.134	24.72	0.13		73.39	0.248	32.35	0.18
	74.32	0.15	33.28	0.13		78.25	0.22	38.79	0.16
	74.26	0.144	21.21	0.112		78.79	0.25	37.69	0.14
	73.68	0.15	21.08	0.14		74.01	0.258	35.9	0.17
	73.97	0.14	27.25	0.132		79.93	0.228	35.05	0.18
	74.63	0.144	28.73	0.11		78.52	0.21	36.79	0.23
	73.52	0.144	20.66	0.13		75.1	0.248	34.71	0.15
	74.78	0.15	21.9	0.14		70.92	0.25	36.67	0.17
	72.51	0.144	33.24	0.12		79.02	0.25	40.4	0.18
	72.44	0.14	16.5	0.14		71.82	0.198	35.03	0.17
	74.72	0.14	33.65	0.092		79.32	0.188	37.81	0.18
	72.03	0.144	17.2	0.13		78.07	0.198	38.17	0.2
	74.72	0.134	31.92	0.132		76.39	0.2	42.08	0.19
	73.56	0.144	31.71	0.13		71.52	0.2	40.24	0.15
	72.81	0.14	17.41	0.11		79.05	0.24	33.67	0.17
	73.12	0.14	22.19	0.122		72.15	0.26	38.22	0.15
	73.38	0.15	25.94	0.11		76.19	0.198	32.79	0.22
	73.55	0.14	33.48	0.11		71.78	0.198	40.3	0.17
	71.9	0.14	31.19	0.1		76.98	0.26	33.87	0.2
	74.09	0.134	21.85	0.122		72.33	0.248	35.73	0.15
	73.21	0.134	25.78	0.092		76.94	0.268	37.35	0.21
	73.09	0.144	27.95	0.11		79.72	0.218	37.37	0.18
	72.22	0.144	32.2	0.1		75.73	0.23	37.66	0.22
	73.59	0.14	32.46	0.12		73.63	0.188	34.56	0.24
	73.42	0.14	28.59	0.13		72.26	0.22	35.05	0.14
	74.91	0.14	32.2	0.142		77.02	0.218	32.83	0.21
	71.98	0.14	28.32	0.14		72.45	0.258	31.32	0.23
	74.74	0.144	27.53	0.112		75.71	0.19	39.33	0.19
	74.1	0.144	24.23	0.102		78.23	0.258	34.59	0.2
	74.36	0.14	20.69	0.132		79.9	0.23	36.35	0.21
	74.89	0.144	16.35	0.132		73.57	0.218	37.65	0.15
	73.5	0.14	20.08	0.14		70.5	0.18	41.02	0.24
	72.41	0.14	16.32	0.13		76.23	0.2	35.41	0.2
	72.99	0.144	26.15	0.112		76.06	0.248	37.89	0.23
	74.49	0.14	21.07	0.112		79.45	0.218	40.05	0.16
	74.08	0.14	26.4	0.14		79.6	0.18	39.03	0.17
	74.78	0.14	27.61	0.092		79.63	0.19	34.51	0.23
	71.89	0.144	30.91	0.12		71.35	0.25	34.75	0.24
	74.58	0.14	20.76	0.1		77.18	0.22	30.72	0.17
	72.42	0.14	25.25	0.142		74.69	0.23	41.23	0.18
	74.14	0.14	17.35	0.132		76.75	0.25	35.61	0.18
	71.97	0.14	33.3	0.13		73.81	0.26	40.66	0.17
	73.1	0.144	29.04	0.122		77.03	0.218	40.58	0.21
	73.21	0.14	25.86	0.102		72.17	0.248	30.72	0.16
	74.92	0.14	22.91	0.11		71.43	0.198	30.19	0.16
	73.54	0.144	23.69	0.142		70.8	0.218	37.25	0.23
	73.25	0.144	27.83	0.15		71.68	0.228	32.16	0.16
	73.25	0.144	18.86	0.15		73.45	0.26	39.16	0.16
	74.82	0.14	27.9	0.12		77.73	0.248	39.99	0.22
	73.65	0.144	27.22	0.15		73.46	0.23	35.15	0.22
	73.55	0.144	27.39	0.12		78.14	0.23	35.32	0.16
	74.06	0.15	18.61	0.12		72.38	0.21	39.48	0.2
	72.08	0.144	21.48	0.102		71.72	0.19	39.61	0.24
	72.22	0.144	17.7	0.1		76.59	0.22	38.29	0.14
	74.58	0.144	32.79	0.132		74.17	0.198	33.93	0.19
	71.9	0.15	33.37	0.11		73.97	0.22	36.05	0.14
avg	73.4	0.142	24.9	0.121		75.2	0.224	36.2	0.19

## Sheet: AlexNet
		SFEARA(AlexNet)					AlexNet
	acc	sirt	ec	sumtime		acc	sirt	ec	sumtime
	92.84	0.224	40.03	0.204		90.98	0.37	44.05	0.278
	83.12	0.274	42.58	0.204		87.03	0.36	49.85	0.368
	83.7	0.194	33.48	0.18		86.29	0.33	41.47	0.35
	80.8	0.24	35.06	0.22		92.59	0.39	45.44	0.378
	86.52	0.214	40.43	0.214		81.88	0.33	42.72	0.29
	82.79	0.224	42.04	0.2		80.93	0.358	50.38	0.37
	80.79	0.274	40.08	0.18		90.01	0.33	44.75	0.28
	81.33	0.24	43.92	0.21		86.49	0.4	43.5	0.308
	81.4	0.254	36.06	0.214		89.2	0.368	44.92	0.338
	80.55	0.254	30.81	0.19		92.98	0.368	46.43	0.36
	92.98	0.204	38.18	0.194		82.51	0.37	45.93	0.37
	84.7	0.2	41.42	0.2		80.17	0.37	47.7	0.3
	89.87	0.27	34.84	0.204		94.22	0.388	54.49	0.35
	91.51	0.214	30.85	0.184		93.47	0.35	41.38	0.328
	84.61	0.194	41.23	0.194		82.4	0.338	47.58	0.26
	89.4	0.224	34.17	0.19		88.22	0.348	53.28	0.32
	84.8	0.19	39.36	0.21		91.42	0.39	42.13	0.29
	89.66	0.194	42.59	0.174		82.24	0.35	42.48	0.25
	92.68	0.28	40.61	0.184		94.23	0.38	43.7	0.34
	82.36	0.25	34.11	0.204		80.13	0.34	45.71	0.34
	82.28	0.224	43.37	0.21		94.08	0.36	41.46	0.24
	93.5	0.27	32.78	0.204		93.24	0.378	42.23	0.26
	93.49	0.224	31.02	0.184		86.29	0.36	51.37	0.288
	88.23	0.274	30.4	0.194		82.98	0.388	41.28	0.348
	79.45	0.194	33.49	0.19		80.64	0.35	49.56	0.248
	91.95	0.24	31.66	0.2		87.34	0.34	49.82	0.35
	83.76	0.21	35.75	0.214		91.2	0.34	42.79	0.35
	86.67	0.214	31.83	0.194		87.37	0.358	42.97	0.268
	89.68	0.27	43.55	0.214		90.24	0.36	44.63	0.33
	90.09	0.264	34.15	0.18		92.16	0.4	54.16	0.36
	86.46	0.264	39.93	0.2		93.83	0.348	54.62	0.338
	83.34	0.234	42.97	0.214		84.88	0.398	53.46	0.33
	85.67	0.22	40.09	0.2		80.89	0.33	50.61	0.35
	93.92	0.23	35.65	0.174		81.18	0.39	54.78	0.34
	83.37	0.264	35.53	0.184		87.72	0.358	45.26	0.258
	79.31	0.194	42.1	0.214		84.39	0.398	47.19	0.248
	86.75	0.2	40.28	0.194		80.57	0.36	41.21	0.368
	80.68	0.194	41.5	0.194		93.51	0.38	52.86	0.358
	84.57	0.224	30.31	0.174		82.98	0.37	46.85	0.288
	90.69	0.254	43.29	0.194		91.51	0.378	49.93	0.3
	93.29	0.24	33.64	0.214		81.54	0.338	43.98	0.36
	89.3	0.26	39.67	0.214		81.71	0.328	46.38	0.3
	93.94	0.25	30.91	0.194		80.11	0.358	45.08	0.36
	90.05	0.264	30.91	0.2		84.34	0.338	54.79	0.27
	88.27	0.2	43.91	0.2		88.94	0.36	41.51	0.248
	87.7	0.204	41.99	0.204		83.12	0.36	49.57	0.24
	89.09	0.264	38.45	0.2		92	0.358	48.91	0.288
	83.48	0.24	43.41	0.214		89.58	0.36	41.05	0.25
	89.13	0.21	32.32	0.204		93.39	0.39	52.3	0.28
	89.73	0.24	38.37	0.194		88.04	0.348	51.04	0.24
	87.9	0.19	34.27	0.214		81.46	0.338	41.14	0.32
	79.53	0.22	43.35	0.21		86.65	0.388	54.08	0.25
	91.37	0.2	32.76	0.214		83.68	0.338	53.04	0.29
	91.39	0.28	40.45	0.204		93.62	0.35	45.37	0.27
	83	0.204	43.18	0.19		85.2	0.35	53.28	0.248
	89.66	0.224	38.16	0.2		84.7	0.34	44.83	0.25
	86.34	0.2	43.01	0.19		84.15	0.37	43.2	0.278
	80.8	0.24	38.13	0.18		94.27	0.37	48.23	0.36
	87.13	0.194	40.75	0.19		86.07	0.4	47.39	0.348
	89.68	0.27	42	0.214		82.67	0.338	43.57	0.348
	85.61	0.27	31.62	0.19		94.13	0.38	54.72	0.37
	92	0.19	33.57	0.184		92.52	0.378	44.51	0.33
	81.29	0.26	30.65	0.204		92.64	0.398	48.97	0.358
	86.31	0.204	42.54	0.204		81.63	0.338	54.49	0.318
	87.19	0.194	36.32	0.194		90.06	0.33	47	0.328
	88.19	0.264	33.45	0.22		85.55	0.358	45.39	0.318
	92.01	0.23	39.42	0.2		84.16	0.36	50.64	0.358
	80.79	0.25	38.5	0.18		93.05	0.348	50.74	0.37
	80.6	0.26	31.04	0.194		93.89	0.398	51.74	0.33
	88.09	0.26	33.77	0.184		90.43	0.33	53.2	0.33
	79.21	0.234	34.12	0.19		82.64	0.358	41	0.348
	81.29	0.27	38.67	0.204		81.42	0.398	45.36	0.33
	83.14	0.224	32.97	0.194		80.91	0.358	50.29	0.288
	83.12	0.264	33.59	0.19		82.01	0.35	54.95	0.34
	84.9	0.184	31.5	0.184		80.32	0.368	51.17	0.358
	89.43	0.2	38.1	0.184		85.46	0.398	42.22	0.27
	86.49	0.28	31.1	0.214		86.35	0.37	41.26	0.27
	81.13	0.224	40.56	0.204		82.89	0.39	46.27	0.25
	80.57	0.224	30.83	0.2		88.33	0.37	45.78	0.328
	89.55	0.234	37.37	0.174		85.58	0.38	50.35	0.338
	83.27	0.244	43.1	0.2		89.77	0.328	53.44	0.288
	89.19	0.244	41.99	0.2		83.92	0.34	41.31	0.268
	85.06	0.204	41.44	0.2		92.69	0.33	43.14	0.328
	88	0.25	41.88	0.18		85.1	0.39	49.15	0.288
	86.04	0.184	43.76	0.2		87.43	0.368	45.33	0.278
	79.17	0.2	37.82	0.174		80.18	0.378	51.38	0.26
	82.71	0.194	41.34	0.21		92.77	0.37	47.77	0.29
	80.48	0.2	42.67	0.194		83.7	0.378	42.18	0.298
	84.68	0.26	42.12	0.2		89.51	0.4	54.74	0.37
	90.7	0.27	32.1	0.214		83.2	0.33	49.56	0.308
	79.26	0.224	39.49	0.194		90.14	0.368	50.22	0.348
	89.27	0.27	33.75	0.2		92.39	0.37	50.03	0.308
	93.27	0.27	34.53	0.204		82.5	0.37	52.35	0.368
	90.01	0.244	39.45	0.194		82.16	0.34	45.48	0.268
	81.41	0.194	33.92	0.174		80.78	0.34	51.71	0.33
	92.26	0.21	41.45	0.19		88.85	0.33	45.97	0.35
	86.68	0.234	32.86	0.18		87.51	0.33	52.83	0.298
	92.6	0.274	36.07	0.18		81.16	0.338	51.25	0.358
	92.12	0.234	36.38	0.184		81.32	0.35	48.61	0.34
	89.04	0.274	39.39	0.18		86.99	0.39	51.3	0.26
	83.86	0.21	42.7	0.21		88.11	0.33	50.67	0.248
	91.47	0.184	36.09	0.22		90.73	0.378	47.09	0.338
	89.1	0.23	37.3	0.21		84.26	0.398	48.42	0.248
	84.53	0.274	36.02	0.204		91.24	0.368	45.56	0.378
	83.61	0.19	35.6	0.19		88.6	0.338	44.29	0.348
	92.6	0.19	32.86	0.18		91.9	0.358	46.44	0.37
	80.12	0.23	37.88	0.2		92.86	0.368	46.15	0.26
	91.51	0.254	32.7	0.2		91.76	0.358	53.77	0.28
	85.36	0.2	36.13	0.174		81.81	0.358	53.78	0.288
	92.32	0.184	34.13	0.194		92.24	0.37	51.49	0.318
	79.51	0.184	41.22	0.19		81.43	0.39	48.3	0.348
	82.93	0.204	40.43	0.18		86.18	0.36	50.52	0.29
	83.25	0.234	34.81	0.174		90.73	0.348	41.51	0.268
	89.53	0.264	34.78	0.2		88.05	0.34	49.12	0.358
	90.31	0.25	40.05	0.22		88.82	0.378	51.68	0.37
	92	0.224	33.77	0.19		89.8	0.358	50.07	0.27
	82.49	0.2	36.83	0.214		91.42	0.39	50.92	0.3
	93.63	0.27	43.8	0.174		92.94	0.348	53.03	0.26
	87.44	0.24	39.14	0.204		92.77	0.358	41.22	0.288
	81.43	0.24	31.19	0.194		86.68	0.378	45.62	0.258
	89.32	0.26	43.89	0.204		90.25	0.338	41.92	0.28
	86.31	0.264	38.96	0.184		89.3	0.38	49	0.28
	82.1	0.224	35.87	0.204		87.32	0.39	53.98	0.29
	93.54	0.28	33.5	0.2		84.63	0.39	44.65	0.32
	91.67	0.204	36.1	0.21		83.16	0.38	43.65	0.248
	82.75	0.24	36.24	0.19		90.59	0.35	53.82	0.268
	93.35	0.22	32.16	0.19		81.35	0.37	42.8	0.248
	81.24	0.224	35.7	0.22		90.59	0.328	50.73	0.27
	91.4	0.26	44	0.19		83.67	0.398	47.03	0.248
	80.54	0.214	41.5	0.2		80.27	0.388	44.96	0.268
	93.59	0.21	41.34	0.22		91.73	0.368	54.69	0.298
	82.11	0.2	31.83	0.214		92.97	0.38	53.37	0.27
	79.95	0.24	32.2	0.184		81.76	0.378	53.52	0.24
	78.88	0.204	41.19	0.22		81.54	0.388	54.53	0.268
	78.86	0.24	38.6	0.184		92.86	0.35	54.67	0.33
	92.32	0.194	43.16	0.22		80.51	0.378	42.72	0.32
	92.25	0.2	30.28	0.174		94.29	0.398	45.65	0.338
	80.2	0.244	30.79	0.19		91.89	0.388	49.62	0.358
	83.71	0.23	34.02	0.22		83.97	0.398	53.21	0.27
	83.14	0.24	40.07	0.214		92.74	0.33	45.39	0.31
	79.96	0.28	31.53	0.18		81.66	0.37	51.08	0.33
	89.46	0.224	36.9	0.194		83.42	0.33	42.54	0.25
	87.15	0.24	36.91	0.18		83.67	0.358	50.56	0.368
	83.4	0.234	34.77	0.194		86.36	0.398	50.63	0.298
	92.85	0.27	32.7	0.2		88.77	0.398	49.73	0.37
	85.65	0.23	43.29	0.184		85.37	0.368	45.27	0.248
	92.2	0.214	32.21	0.194		87.41	0.34	41.33	0.37
	91.56	0.194	31.23	0.194		90.72	0.348	42.63	0.26
	86.49	0.244	40.72	0.204		84.82	0.37	51.26	0.288
	83.07	0.23	37.96	0.21		87.06	0.368	50.61	0.278
	86.12	0.274	32.98	0.18		93.76	0.39	52.43	0.26
	80.48	0.19	32.75	0.21		84.89	0.36	46.44	0.258
	90.52	0.204	38.55	0.21		87.08	0.4	42.96	0.298
	86.76	0.254	31.61	0.204		93.08	0.348	48.81	0.35
	79.17	0.24	42.37	0.22		89.52	0.398	51.95	0.298
	83.67	0.2	39.43	0.19		86.97	0.33	51.34	0.328
	88.12	0.25	35.24	0.194		87.75	0.34	54.86	0.288
	85.1	0.264	40.71	0.194		85.63	0.38	46.07	0.33
	79.3	0.254	38.14	0.194		92.29	0.38	42.02	0.33
	86.13	0.27	40.7	0.18		82.11	0.328	50.44	0.368
	89.8	0.264	38.07	0.18		81.63	0.388	44.66	0.258
	83.53	0.25	32.08	0.2		83.81	0.388	42.56	0.378
	80.2	0.25	34.71	0.194		84.6	0.38	46.18	0.288
	90.44	0.214	43.39	0.18		81.01	0.388	46.88	0.258
	82.63	0.22	32.6	0.194		93.22	0.388	43.17	0.31
	93.63	0.21	38.11	0.21		81.17	0.34	52.02	0.37
	87.74	0.194	40.63	0.194		90.48	0.38	55	0.358
	88.1	0.264	40.18	0.194		89.7	0.36	41.84	0.358
	80.85	0.22	35.83	0.214		87.91	0.368	52.8	0.278
	84.71	0.19	30.44	0.2		86.07	0.338	44.7	0.348
	92.01	0.27	36.04	0.21		86.89	0.398	44.26	0.268
	80.32	0.27	42.37	0.174		83.81	0.358	52.5	0.32
	92.48	0.26	33.01	0.174		85.8	0.348	51.35	0.32
	88.94	0.26	38.33	0.22		88.11	0.368	44.62	0.378
	92.23	0.194	30.2	0.22		93.49	0.35	48.88	0.368
	86.05	0.264	34.75	0.18		90.7	0.338	44.74	0.31
	83.5	0.214	30.29	0.2		93.23	0.328	54.54	0.318
	86.28	0.214	41.6	0.19		89.03	0.388	53.87	0.328
	90.17	0.23	32.21	0.2		88.33	0.348	44.32	0.35
	79.82	0.234	37.29	0.2		91.28	0.348	47.12	0.26
avg	86.4	0.232	37.1	0.197		87.2	0.364	48	0.309

## Sheet: GoogleNet
		SFEARA(GoogleNet)					GoogleNet
	acc	sirt	ec	sumtime		acc	sirt	ec	sumtime
	94.31	0.204	40.43	0.15		92.21	0.508	72.44	0.558
	87.17	0.16	34.2	0.12		91.29	0.52	58.01	0.47
	89.99	0.214	33.35	0.2		91.44	0.628	58.98	0.568
	87.1	0.174	41.28	0.12		93.61	0.648	62.83	0.568
	88.8	0.164	42.23	0.12		93.8	0.538	66.51	0.548
	91.73	0.18	40.43	0.19		91.75	0.49	57.82	0.41
	92.22	0.214	32.33	0.23		92.18	0.518	71.45	0.56
	89.93	0.204	38.2	0.19		92.76	0.608	65.73	0.558
	84.1	0.18	39.39	0.21		91.15	0.49	75.94	0.54
	92.5	0.25	45.41	0.12		93.53	0.62	57.28	0.43
	91.11	0.22	44.99	0.23		93.85	0.59	58.34	0.51
	90.2	0.21	33.37	0.25		93.86	0.648	56.94	0.398
	86.09	0.174	35.12	0.15		93.01	0.588	64.72	0.518
	92.24	0.24	34.91	0.19		93.42	0.48	70.21	0.45
	88.85	0.16	45.53	0.25		92.12	0.498	72.67	0.488
	94.74	0.214	45.29	0.23		93.83	0.478	66.09	0.42
	89.97	0.23	40.2	0.23		92.79	0.508	66.96	0.4
	91.93	0.2	45.15	0.22		92.66	0.61	61.18	0.438
	92.18	0.16	41.35	0.12		93.46	0.498	66.11	0.54
	92.58	0.174	42.25	0.19		92.94	0.53	69.94	0.4
	94.96	0.214	35.43	0.11		93.98	0.538	57.16	0.528
	88.47	0.19	42.62	0.15		91.04	0.618	57.95	0.448
	84.08	0.244	36.04	0.19		93.5	0.52	56.46	0.488
	94.34	0.17	32.16	0.18		91.1	0.598	60.77	0.47
	83.66	0.184	32.52	0.11		91.59	0.628	59.73	0.558
	88.43	0.214	43.48	0.22		92.4	0.508	69.57	0.5
	87.96	0.16	39.16	0.19		92.13	0.578	75.09	0.52
	83.61	0.254	42.63	0.17		91.42	0.64	64.18	0.39
	92.3	0.27	36.94	0.22		91.03	0.63	60.99	0.54
	91.45	0.15	30.76	0.17		91.5	0.55	62.2	0.568
	91.33	0.23	44.89	0.15		91.4	0.48	71.67	0.478
	85.34	0.24	30.82	0.17		92.31	0.608	57.43	0.398
	87.63	0.26	36.29	0.24		91.64	0.5	69.71	0.488
	94.26	0.264	33.38	0.19		91.92	0.628	73.42	0.5
	88.29	0.234	38.56	0.21		92.87	0.638	57.31	0.538
	84.06	0.24	31.66	0.2		91.32	0.498	58.88	0.56
	93.63	0.24	44.88	0.24		91.33	0.59	63.92	0.47
	93.29	0.264	32.34	0.22		92.8	0.53	68.89	0.52
	90.44	0.25	35.8	0.14		91.2	0.59	65.89	0.56
	87.05	0.22	31.11	0.21		91.16	0.54	75.24	0.558
	90.99	0.2	31.47	0.19		92.16	0.63	60.59	0.57
	88.91	0.264	30.2	0.24		93.16	0.53	65.44	0.52
	84.85	0.2	32.74	0.14		93.46	0.65	71.63	0.55
	86	0.164	41.65	0.23		92.43	0.648	62.3	0.39
	84.78	0.194	36.19	0.19		93.61	0.53	66.65	0.46
	94.05	0.21	31.6	0.21		91.34	0.52	66.31	0.44
	87.37	0.18	35.21	0.23		92.16	0.558	74.97	0.43
	93.32	0.24	45.76	0.25		93.79	0.51	72.88	0.48
	87.38	0.244	39.3	0.19		92.79	0.598	62.46	0.39
	85.22	0.204	30.4	0.24		92.92	0.568	74.01	0.54
	87.64	0.254	43.02	0.16		93.9	0.54	67.05	0.428
	92.56	0.26	42.93	0.24		92.06	0.618	72.87	0.49
	92.4	0.164	36.16	0.24		91.26	0.578	58.35	0.49
	83.52	0.24	45.45	0.13		93.9	0.648	70.48	0.518
	89.49	0.184	31.25	0.16		92.2	0.588	60.37	0.44
	89.93	0.21	43.26	0.15		91.72	0.538	57.29	0.41
	90.11	0.24	41.09	0.14		91.54	0.49	61.45	0.478
	85.11	0.264	44.53	0.19		93.68	0.568	73.26	0.488
	94.28	0.25	32.09	0.21		92.01	0.55	67.58	0.498
	86.95	0.164	32.98	0.24		92.99	0.62	66.29	0.458
	89.55	0.214	40.93	0.23		91.92	0.5	75.46	0.54
	91.12	0.174	40.16	0.15		91.01	0.56	75.25	0.53
	89.81	0.244	40.15	0.14		92.02	0.588	60.73	0.5
	90.25	0.23	45.23	0.17		92.4	0.6	69.72	0.42
	89.44	0.214	36.7	0.12		91.56	0.53	74.58	0.548
	92.96	0.194	33.23	0.19		91.21	0.6	65.35	0.53
	94.36	0.23	33.07	0.19		93.12	0.52	60.67	0.438
	92.1	0.16	38.75	0.13		92.29	0.568	73.68	0.52
	94.96	0.25	43.6	0.23		91.47	0.648	56.83	0.528
	94.06	0.164	44.55	0.13		91.69	0.608	75.12	0.408
	93.22	0.154	30.22	0.17		93.44	0.568	60.11	0.418
	88.96	0.224	33.28	0.19		91.58	0.608	74.33	0.548
	84.35	0.21	39.06	0.13		93.05	0.55	63.74	0.43
	83.44	0.17	33.77	0.22		91.32	0.58	74.45	0.398
	87.21	0.21	30.71	0.14		91.04	0.52	59.52	0.458
	83.98	0.204	44.98	0.18		91.39	0.638	71.41	0.49
	89.54	0.184	44.7	0.18		91.17	0.61	75.11	0.518
	84.14	0.274	37.28	0.21		91.86	0.538	57.59	0.46
	85.18	0.23	34.61	0.17		92.04	0.588	59.53	0.398
	83.44	0.204	30.59	0.22		92.28	0.598	71.5	0.418
	94.88	0.174	37.44	0.14		92.6	0.558	57.15	0.46
	90.13	0.214	45.88	0.17		91.73	0.58	72.03	0.48
	92.31	0.22	38.99	0.13		91.17	0.61	74.68	0.42
	85.67	0.23	34.35	0.2		92.96	0.52	69.13	0.488
	90.42	0.23	31.3	0.2		92.68	0.61	74.81	0.4
	85.82	0.224	34.72	0.11		93.84	0.65	62.19	0.47
	94.53	0.274	39.46	0.22		93.68	0.618	60.9	0.4
	84.12	0.25	45.24	0.23		93.41	0.59	66.67	0.538
	91.17	0.21	35.84	0.13		91.17	0.508	59.03	0.43
	90.76	0.24	32.9	0.17		93.99	0.5	62.69	0.538
	92.41	0.194	36.1	0.19		92.3	0.648	63.59	0.41
	86.3	0.24	31.12	0.25		93.92	0.648	57.72	0.438
	89.77	0.26	43.91	0.22		93.73	0.51	68.81	0.538
	89.6	0.26	39.84	0.13		93.08	0.498	66.34	0.568
	88.24	0.244	35.33	0.15		93.58	0.51	63.51	0.51
	86.29	0.214	45.88	0.24		91.71	0.638	72.32	0.5
	89.41	0.224	45.12	0.21		93.26	0.618	67.7	0.458
	84.34	0.15	39.96	0.13		93.25	0.64	74.05	0.39
	91.46	0.204	45.7	0.21		91.2	0.53	70.2	0.4
	89.28	0.22	42.81	0.13		93.96	0.65	59.96	0.498
	87.98	0.18	35.07	0.17		92.24	0.608	58.39	0.42
	86.94	0.26	43.84	0.24		93.68	0.63	60.78	0.44
	86.1	0.184	39.71	0.13		93.35	0.52	68.36	0.508
	84.77	0.26	35.57	0.18		93.74	0.57	66.06	0.53
	93.55	0.184	41.88	0.2		91.84	0.508	65.28	0.548
	89.22	0.254	30.47	0.21		93.71	0.49	70.1	0.508
	90.14	0.264	43.1	0.12		93.75	0.48	63.67	0.388
	87.24	0.214	36.86	0.24		92.21	0.548	61.19	0.44
	89.7	0.154	33.64	0.18		92.13	0.578	68.66	0.41
	83.87	0.18	43.67	0.12		91.32	0.64	71.98	0.47
	85.9	0.194	40.88	0.25		91.88	0.638	71.22	0.468
	88.99	0.184	45.8	0.16		92.88	0.63	68.73	0.41
	88.2	0.19	34.25	0.19		93.96	0.478	74.36	0.428
	94.23	0.214	38.72	0.15		91.39	0.618	60.08	0.458
	88.1	0.21	34.21	0.2		91.09	0.48	73.03	0.518
	92.14	0.24	32.4	0.14		93.47	0.62	58.62	0.53
	84.17	0.274	43.05	0.17		93.16	0.58	67.12	0.52
	94.24	0.174	32.95	0.15		93.6	0.48	71.46	0.45
	93.06	0.27	33.82	0.15		92.71	0.59	62.68	0.47
	87.28	0.22	30.12	0.12		93.08	0.56	63.27	0.43
	84.29	0.234	44.4	0.23		91.02	0.56	68.22	0.398
	88.26	0.154	42.18	0.17		91.25	0.54	57.07	0.4
	91.03	0.15	36.61	0.23		92.84	0.48	71.91	0.468
	86.47	0.23	36.54	0.16		91.54	0.528	60.05	0.408
	90.35	0.164	30.12	0.13		93.27	0.528	62.82	0.428
	87.07	0.194	43.66	0.2		91.65	0.648	64.82	0.558
	85.84	0.23	35.01	0.16		91.53	0.48	71.73	0.418
	92.83	0.194	42.65	0.21		92.32	0.518	58.72	0.488
	94.32	0.21	44.75	0.22		92.94	0.608	71.81	0.42
	86.26	0.184	30.24	0.11		93.14	0.608	62.65	0.558
	86.16	0.204	33.19	0.23		91.32	0.558	71.5	0.47
	93.62	0.184	39.9	0.24		92.98	0.5	60.95	0.458
	93.18	0.23	30.3	0.14		92.06	0.648	58.07	0.48
	88.7	0.26	31.45	0.21		92.6	0.48	73.37	0.418
	91.19	0.184	41.42	0.13		91.92	0.598	73.52	0.47
	87.23	0.25	30.88	0.23		93	0.57	65.75	0.5
	83.71	0.244	44.34	0.23		92.84	0.56	61.8	0.56
	88.86	0.21	44.8	0.25		93.28	0.518	64.04	0.458
	91.8	0.2	42.77	0.13		93.68	0.62	73.78	0.47
	91.23	0.224	37.38	0.17		92.53	0.498	69.75	0.51
	86.22	0.204	37.01	0.11		93.56	0.488	72.36	0.53
	88.41	0.22	30.85	0.19		93.36	0.51	64.7	0.568
	92.73	0.19	40.57	0.24		91.99	0.648	73.65	0.428
	89.12	0.18	36	0.13		93.08	0.638	75.57	0.418
	94.79	0.22	39.14	0.18		92	0.65	56.77	0.54
	88.59	0.25	30.77	0.14		92.17	0.51	59.37	0.558
	86.67	0.22	31.59	0.14		93.7	0.54	58.04	0.468
	86.18	0.194	34.58	0.23		92.34	0.63	58.75	0.468
	85.99	0.214	35.57	0.15		92.08	0.478	70.6	0.538
	84.09	0.26	37.8	0.12		91.14	0.548	63.42	0.448
	88.27	0.194	44.41	0.15		93.31	0.498	74.74	0.39
	83.81	0.25	37.53	0.12		92.83	0.57	60.94	0.448
	88.05	0.174	40.79	0.18		93.66	0.598	68.48	0.54
	91.3	0.164	41.8	0.17		93.98	0.51	68.98	0.488
	94.3	0.17	38.47	0.21		92.49	0.628	63.95	0.4
	91.02	0.174	40.67	0.17		93.91	0.518	68.45	0.528
	85.57	0.204	37.25	0.11		93.83	0.48	60.42	0.468
	94.42	0.234	38.62	0.17		91.3	0.59	64.23	0.49
	84.16	0.184	40.72	0.16		92.51	0.568	70.95	0.49
	85.44	0.164	45.6	0.17		93.97	0.518	75.12	0.55
	90.16	0.21	31.02	0.19		93.83	0.618	68.17	0.478
	84.04	0.27	39.81	0.15		91.74	0.48	75.63	0.438
	94.69	0.244	34.12	0.12		93.8	0.538	60.04	0.548
	94.11	0.184	31.01	0.16		91.27	0.488	74.39	0.488
	87.41	0.194	35.28	0.13		91.02	0.538	69.58	0.54
	88.47	0.23	42.72	0.17		91.08	0.478	59.14	0.47
	89.18	0.22	31.2	0.21		92.47	0.548	72.35	0.5
	91.16	0.21	35.85	0.21		93.67	0.52	74.06	0.448
	88.63	0.224	36.84	0.15		92.87	0.62	61.92	0.498
	92.11	0.21	33.75	0.19		93.29	0.608	57.28	0.438
	94.59	0.25	41.79	0.18		91.51	0.63	60.49	0.488
	85.08	0.21	30.55	0.17		92.57	0.49	57.66	0.488
	91.35	0.224	42.36	0.12		92.72	0.598	62.25	0.56
	88.15	0.174	45.78	0.22		92.7	0.56	72.29	0.428
	90.35	0.214	40	0.13		91.1	0.538	60.9	0.418
	87.29	0.24	41.39	0.14		92.69	0.528	67.68	0.528
	90.77	0.194	45.18	0.22		91.95	0.61	71.62	0.528
	90.3	0.2	40.99	0.17		92.82	0.59	70.15	0.418
	88.05	0.2	41.75	0.23		93.49	0.488	75.33	0.418
	86.6	0.194	34.65	0.24		91.84	0.6	71.21	0.51
avg	89.2	0.212	38	0.18		92.5	0.564	66.2	0.479

## Sheet: VGGNet
		SFEARA(VGGNet)					VGGNet
	acc	sirt	ec	sumtime		acc	sirt	ec	sumtime
	81.7	0.399	43.9	37.7		91.5	0.629	70.6	53.5
	83.5	0.309	37.1	43.7		86.3	0.513	69.9	49.7
	82.7	0.346	48.9	26.5		84.1	0.485	71.8	54.6
	93.4	0.37	48.5	37.9		95.5	0.492	74.8	57.5
	82.7	0.317	49.7	39		85.8	0.486	68.2	49.2
	85.7	0.398	47.4	34		93.3	0.652	77.7	55.2
	80.2	0.386	39.4	25		89.4	0.615	72.8	49.9
	79.5	0.317	37.7	27.1		82.1	0.577	69.8	56.9
	92.6	0.333	40.6	26.6		89.8	0.677	68.2	48.3
	94.3	0.365	38.3	40		83.9	0.48	70.2	54
	94.1	0.309	49.1	43		85	0.636	73.9	48.9
	88	0.326	38.7	37.7		83.9	0.585	69.6	57.1
	78	0.38	46.6	36.7		95	0.541	74.9	56.8
	93.5	0.305	39.7	44.2		85.9	0.509	74.6	49.4
	89.1	0.338	35.1	35.8		77.8	0.642	73.1	49.8
	81.4	0.369	40.9	43.6		80.4	0.676	77.1	57.3
	76.4	0.387	44.3	36		85.4	0.63	76.6	54.3
	75.9	0.316	48.2	43.1		82.1	0.587	71.5	54.9
	85.8	0.352	39.4	30.3		95.8	0.483	76.8	54.3
	94.1	0.328	46.4	39.2		95.1	0.599	76.5	48
	87	0.39	36.3	33.6		95	0.666	71.5	49.7
	75.2	0.311	45.8	26.7		92.7	0.675	69.8	57.3
	82.3	0.369	42.9	32.8		92	0.675	78	57.2
	77.2	0.305	40.4	38.1		78.1	0.566	68.3	57.5
	94.8	0.319	38.6	36.8		87.2	0.526	71.9	56.9
	85.4	0.339	37.8	35.6		86	0.63	74	54.4
	77.1	0.343	44.9	37.3		81.7	0.644	76.1	57.8
	75.6	0.376	37	33.6		92.8	0.625	73.9	50.7
	91.5	0.347	39	27.5		83.5	0.673	74.3	54.8
	86	0.397	40.9	36.3		80.4	0.603	76.9	54
	83.2	0.373	47.4	38.2		77.3	0.489	69.9	54.1
	81.8	0.357	49	42.8		78.6	0.493	77.7	55
	89.1	0.305	35.7	32.9		78	0.574	74.3	56.6
	81.9	0.368	47	42.4		83	0.622	71.8	49.4
	89.8	0.335	40.3	35.4		85.1	0.575	75.1	57.7
	76.7	0.335	42.7	32.3		79.7	0.653	71.8	49.7
	78	0.319	38.7	34		88.6	0.486	68.9	49.4
	84.3	0.347	40.2	36.2		86.2	0.635	69.3	48.4
	87.4	0.336	48.1	30.7		78.1	0.607	75.4	48.7
	90.8	0.397	43.5	35		85.4	0.621	73.4	54.1
	91.5	0.329	46	33.8		93.4	0.654	71.7	49.7
	86	0.322	41.6	34		85.9	0.643	72.9	53.4
	81.8	0.307	46.7	25.7		94.4	0.49	71.5	51.7
	91.1	0.362	48	42		92.6	0.534	69	53.3
	89	0.351	46.6	43.5		80.4	0.55	72	52.7
	77.2	0.302	42	30.1		89.7	0.482	75.8	49
	84	0.309	45.7	33.3		89.5	0.633	76.9	50.3
	81.5	0.366	47.9	39.8		83.7	0.492	68	52.1
	82.2	0.348	35.3	35.2		93.1	0.621	70.8	51.5
	86	0.346	35.1	34.6		88.8	0.559	77.9	51.1
	82.9	0.309	41.4	27.1		88.6	0.665	74.1	57.1
	75.8	0.358	37.4	37.4		80.9	0.637	77.4	52.4
	82.7	0.322	48.4	41.7		81.2	0.658	68.2	51.6
	78.6	0.351	38.2	43.8		84.4	0.634	72.9	48.8
	83.6	0.398	45.5	28.1		87.6	0.628	74.3	52.9
	90	0.356	41.8	36.1		91	0.538	69.7	57
	89.4	0.379	47.5	29.6		86.3	0.551	77.8	54.6
	80.1	0.337	48.3	38.1		81.7	0.679	73.7	50.9
	85.1	0.324	39.3	39.9		88	0.671	70.8	57.1
	78	0.306	50	43.8		80.6	0.6	72.6	51.8
	86.3	0.302	41.5	37.5		88.7	0.516	71.2	50.3
	80.2	0.305	42.4	25.9		83	0.67	74.6	49.3
	78.8	0.313	36	30.8		77.1	0.504	76.3	52.6
	81.1	0.371	35.4	35.2		77.8	0.615	70.6	54.3
	79.1	0.361	45.2	43.3		79.8	0.597	72.8	51
	75	0.364	44.3	38.5		92	0.54	75	49.3
	84.2	0.4	44.3	40.5		88.1	0.663	72.7	48.7
	88.6	0.393	40.1	42.3		93.5	0.578	74.2	57.2
	85.8	0.369	39.6	30.5		83.9	0.651	72.6	49.5
	80.1	0.328	36.7	26.9		85.6	0.562	74.2	48.2
	93.2	0.345	49.7	29		91.1	0.594	68.7	52.9
	85	0.316	36.8	26.3		92.3	0.65	75	52.7
	89.9	0.335	46.2	42.8		85	0.59	70.2	56.9
	93.9	0.352	45.4	31.9		95.8	0.579	70.6	52.4
	92.6	0.354	44.5	38.6		87.6	0.563	76.5	51.4
	90.2	0.315	35.4	30.2		94.2	0.61	76.7	49.2
	80.9	0.335	45.6	37.3		90.7	0.641	72.1	50.7
	80.1	0.306	40.3	44		89.2	0.545	69.6	52.6
	86.8	0.312	39.1	32.8		86.1	0.642	73.6	55
	77.8	0.372	49.7	25.9		80.3	0.531	72.9	52.2
	82.7	0.39	38.6	36.2		81.4	0.661	77.5	52.5
	88.3	0.331	49.6	34.3		77.3	0.642	70	57.5
	89.6	0.353	48.9	31.7		88.5	0.638	74.1	50.9
	86.7	0.347	39.3	44.3		94.2	0.632	71.2	57.8
	92.7	0.357	42.2	43.7		93.6	0.659	69.4	54.3
	93.4	0.321	48.8	28		95.2	0.618	74.1	48.4
	77.9	0.368	48.8	36.4		91.4	0.582	72.4	51.7
	88.3	0.303	35.2	43.8		82.2	0.596	70	51.3
	83.6	0.353	45.6	43.7		77.6	0.519	73.5	55.8
	91.8	0.332	47	31.6		95	0.524	74.9	55
	86.9	0.3	41.8	39.7		77.8	0.603	73.4	55.3
	82.4	0.303	44.5	43.8		94	0.587	76.6	48.3
	85	0.325	37.1	34.1		93.7	0.634	77.8	52.5
	86.8	0.372	44.9	31.7		82	0.575	68.7	49.5
	87.5	0.383	40.2	41.2		81.8	0.578	74	49.9
	89.6	0.369	40.7	31.5		87.3	0.554	72.7	54
	91.7	0.369	39.1	41.9		92.1	0.641	68.8	49
	89	0.33	40.5	30.5		90.3	0.512	75	51.4
	76.5	0.367	36.3	25.8		77.5	0.626	69.3	56.3
	77.1	0.392	42.5	34.5		90.5	0.484	75.4	52.8
	89.4	0.367	47.8	28.7		81.9	0.515	68.3	57.3
	85.3	0.398	38.3	35.3		85.8	0.6	69.6	49.3
	83.3	0.369	39.2	27.4		78.2	0.602	72.4	53.1
	78.9	0.318	42.2	43.5		82.7	0.546	73.6	52.8
	94	0.331	48.6	37.4		83.8	0.669	74	48.1
	77.2	0.394	39.8	29.4		93.8	0.634	71.6	50.4
	78.4	0.319	39.5	31.9		90.5	0.506	68.2	52.5
	85.5	0.345	41.7	38.3		87.6	0.592	75.5	55.6
	77.5	0.385	48.3	33.5		92.7	0.619	74.2	56.4
	91.7	0.309	37.4	37.2		91.7	0.675	76.1	49.5
	84.9	0.374	38.8	30.7		77.5	0.621	76.4	53.9
	87.3	0.368	48.5	35.8		81.8	0.514	76.9	53.6
	82.2	0.381	46.7	30.3		95.4	0.54	71.4	51.1
	92.4	0.332	43.6	36		82.3	0.632	71.2	50.9
	94.1	0.301	48.5	39.9		91.4	0.674	69.1	48.5
	82.3	0.361	49	44.1		84.8	0.503	68.8	48.8
	86.6	0.35	40.8	31.1		79.9	0.564	76.1	50.1
	81.1	0.369	41.4	26.2		87.4	0.571	69.1	52.3
	84	0.325	48.7	32.8		92.3	0.593	76.6	55.4
	89.6	0.331	41.5	39.9		81.3	0.557	73.8	53.2
	81.2	0.332	47.2	43.3		83.2	0.493	71.9	57.6
	78.8	0.322	48.5	25.5		82.9	0.587	71.2	56.6
	93.7	0.4	44.7	31.7		92.4	0.546	68.3	53.7
	79.5	0.312	36.5	29.8		84.8	0.658	70.2	56
	83.4	0.322	48.9	41.3		92	0.543	77.1	48.8
	91.7	0.318	40.2	38		90.2	0.509	73.8	48.8
	78.3	0.396	41.7	30.7		86.8	0.632	73	51.3
	84.5	0.377	47.4	29.4		94.1	0.48	71.8	57
	84	0.319	35.8	43		77.1	0.658	76.9	51.1
	90.1	0.374	45.7	39.4		91.1	0.546	74.8	48.5
	94.1	0.348	42.3	28.4		92.2	0.524	77.1	55.6
	90.6	0.305	38	34.9		89.2	0.578	70.5	54.7
	83.4	0.304	49	40.3		80	0.644	68.7	48.5
	87.1	0.399	42.3	43.7		92.2	0.592	77.6	54.1
	83.6	0.375	44.3	28		88	0.6	68.3	51
	79.4	0.329	44.1	26.8		82.5	0.64	71.3	49.1
	92.1	0.337	45.1	27.2		77.2	0.676	71.5	55.6
	87.3	0.329	47.6	38.6		91.4	0.556	70.6	56.1
	75.3	0.337	39.8	28.1		77	0.665	70.1	57.8
	87.3	0.309	42.6	35.8		79.3	0.482	76	52.3
	86.9	0.353	39.2	32.1		95.9	0.642	75.8	51.8
	85.5	0.334	40.1	35.7		87.6	0.601	77.5	51.1
	75.9	0.311	39.8	31.5		80.8	0.607	76.9	51.9
	78	0.306	35.4	42		89.4	0.504	68.4	55.8
	84.2	0.324	36.8	34.7		94.6	0.637	76.1	53.4
	91.5	0.303	39.2	35.6		83.7	0.565	77.2	49.4
	86.4	0.396	42.1	34.9		86.3	0.632	74.8	48
	76.4	0.344	36.4	25.8		86.5	0.6	78	54.2
	84	0.31	48.1	42		78.4	0.643	76.2	49.2
	92.7	0.394	37	35.9		91.1	0.651	68.8	57
	83	0.378	46.4	32.7		83.1	0.657	73.5	49.6
	91.8	0.391	45.4	39.9		86.9	0.588	76.5	51.6
	94.9	0.303	40.2	33.2		84.8	0.567	73.6	52.8
	83.6	0.391	38.7	36.5		95.1	0.64	76.6	56.3
	82.5	0.34	40.9	33.8		85	0.653	77	57.5
	79	0.362	43.1	32.6		85.3	0.677	69.4	55.6
	91	0.305	48.5	36.2		84.1	0.628	73.2	55.9
	77.8	0.372	36.7	39.6		85.8	0.577	74.5	50.8
	75.7	0.395	46.5	39.1		84.5	0.596	71.4	55.6
	81.4	0.365	48.7	37.1		83.5	0.668	72	52.5
	78.3	0.31	47	26		82.2	0.655	75.3	51.8
	85.7	0.338	35.2	38.6		80.4	0.581	74.9	57.1
	84	0.327	45.3	33.4		88.1	0.658	75.6	53.7
	87.6	0.305	49.2	32.7		81.6	0.605	74.8	57.5
	91.2	0.333	48.9	41		85	0.522	77.4	57.5
	76.1	0.352	39.2	25.5		81.5	0.555	77.5	53.1
	85.3	0.318	47.2	30.9		92.1	0.543	70.9	56.9
	78.7	0.367	35.8	43		81.5	0.673	75	52.4
	84.3	0.334	41.9	41.3		86.7	0.553	70.3	50.8
	87.4	0.367	46.9	38.1		83.1	0.657	76.1	52.5
	93.8	0.345	47.5	27.1		91.1	0.553	75.5	54.1
	77.6	0.369	44.5	44.2		80.1	0.623	74.7	50.1
	86.1	0.397	46.6	30.9		82.8	0.645	70.8	54.8
	86.1	0.369	38.3	33.4		77.2	0.579	73.1	54.7
	87.1	0.386	43.5	35.8		87.6	0.564	76.9	57.5
	93.2	0.349	43	35.9		89.3	0.663	74.3	50.8
	90.6	0.361	41.6	29.8		94.2	0.655	76.7	54.2
	91.7	0.331	41.1	29.9		82.6	0.593	77.9	48.1
	84.8	0.316	35.6	28.4		83.1	0.534	69.2	54.1
	76.5	0.386	45.4	25.8		88.8	0.503	69.6	50.7
avg	86.6	0.372	45.1	31.6		88.5	0.593	71.2	50.4
